# Supplementary material for: Drosophila SUMM4 complex couples insulator function and DNA replication timing control
Source: bioRxiv preprint, doi:10.1101/2021.10.02.462895, version 3 (2022-07-11)
Supplement: Data S1 [file 462895_file02.xlsx]

## Sheet: ILR proteins
N	Unused	Total	%Cov(95)	Accession	Name	Symbol	Peptides(95%)
1	166.38	166.38	62.71	sp|Q16881|TRXR1_DROME	Thioredoxin reductase 1, cytoplasmic OS=Homo sapiens GN=TXNRD1 PE=1 SV=3	hTXNRD1	152
1	0	166.38	66.29	sp|Q16881-6|TRXR1_DROME	Isoform 6 of Thioredoxin reductase 1, cytoplasmic OS=Homo sapiens GN=TXNRD1	hTXNRD1	152
1	0	166.38	81.56	sp|Q16881-5|TRXR1_DROME	Isoform 5 of Thioredoxin reductase 1, cytoplasmic OS=Homo sapiens GN=TXNRD1	hTXNRD1	152
1	0	166.38	73.87	sp|Q16881-4|TRXR1_DROME	Isoform 4 of Thioredoxin reductase 1, cytoplasmic OS=Homo sapiens GN=TXNRD1	hTXNRD1	152
1	0	166.38	68.06	sp|Q16881-3|TRXR1_DROME	Isoform 3 of Thioredoxin reductase 1, cytoplasmic OS=Homo sapiens GN=TXNRD1	hTXNRD1	152
1	0	166.38	74.95	sp|Q16881-2|TRXR1_DROME	Isoform 2 of Thioredoxin reductase 1, cytoplasmic OS=Homo sapiens GN=TXNRD1	hTXNRD1	152
2	147.26	160.04	74.43	sp|Q9NNW7|TRXR2_DROME	Thioredoxin reductase 2, mitochondrial OS=Homo sapiens GN=TXNRD2 PE=1 SV=3	hTXNRD2	147
2	0	160.04	78.31	sp|Q9NNW7-2|TRXR2_DROME	Isoform 2 of Thioredoxin reductase 2, mitochondrial OS=Homo sapiens GN=TXNRD2	hTXNRD2	147
3	48	48	24.01	sp|Q9VTE2|SUUR_DROME	Protein suppressor of underreplication OS=Drosophila melanogaster OX=7227 GN=SuUR PE=1 SV=3	SuUR	24
4	2	2	1.105	tr|X2JDL2|X2JDL2_DROME	Pigment-dispersing factor receptor, isoform C OS=Drosophila melanogaster OX=7227 GN=Pdfr PE=3 SV=1	Pdfr	1
4	0	2	1.084	tr|M9NET6|M9NET6_DROME	Pigment-dispersing factor receptor, isoform B OS=Drosophila melanogaster OX=7227 GN=Pdfr PE=3 SV=1	Pdfr	1
4	0	2	1.196	sp|Q9W4Y2|PDFR_DROME	PDF receptor OS=Drosophila melanogaster OX=7227 GN=Pdfr PE=1 SV=2	Pdfr	1
5	2	2	2.555	tr|Q8T017|Q8T017_DROME	Double hit, isoform B OS=Drosophila melanogaster OX=7227 GN=Dhit PE=1 SV=1	Dhit	1
5	0	2	2.583	tr|A0A0B4LFL6|A0A0B4LFL6_DROME	Double hit, isoform C OS=Drosophila melanogaster OX=7227 GN=Dhit PE=4 SV=1	Dhit	1
3							26
unique proteins							unique peptides

## Sheet: ILR peptides
N	Accessions	Names	Contrib	Conf	Sequence	Modifications	ProteinModifications	Cleavages	dMass	Obs MW	Obs m/z	Theor MW	Theor m/z	Theor z	Sc	Spectrum	Acq Time	Intensity (Peptide)	PrecursorIntensityAcquisition	Apex Time (Peptide)	Elution Peak Width (Peptide)	MS2Counts
1	sp|Q16881|TRXR1_DROME; sp|Q16881-6|TRXR1_DROME; sp|Q16881-5|TRXR1_DROME; sp|Q16881-4|TRXR1_DROME; sp|Q16881-3|TRXR1_DROME; sp|Q16881-2|TRXR1_DROME	Thioredoxin reductase 1, cytoplasmic OS=Homo sapiens GN=TXNRD1 PE=1 SV=3; Isoform 6 of Thioredoxin reductase 1, cytoplasmic OS=Homo sapiens GN=TXNRD1; Isoform 5 of Thioredoxin reductase 1, cytoplasmic OS=Homo sapiens GN=TXNRD1; Isoform 4 of Thioredoxin reductase 1, cytoplasmic OS=Homo sapiens GN=TXNRD1; Isoform 3 of Thioredoxin reductase 1, cytoplasmic OS=Homo sapiens GN=TXNRD1; Isoform 2 of Thio…	2	99	AGEVTQGFAAALK			cleaved N-A@N-term	0.015902	1261.68	631.849	1261.67	631.841	2	18	1.1.1.2264.18	33.4923	5785.29	5750.28	33.66	0.49	1720.23
1	sp|Q16881|TRXR1_DROME; sp|Q16881-6|TRXR1_DROME; sp|Q16881-5|TRXR1_DROME; sp|Q16881-4|TRXR1_DROME; sp|Q16881-3|TRXR1_DROME; sp|Q16881-2|TRXR1_DROME	Thioredoxin reductase 1, cytoplasmic OS=Homo sapiens GN=TXNRD1 PE=1 SV=3; Isoform 6 of Thioredoxin reductase 1, cytoplasmic OS=Homo sapiens GN=TXNRD1; Isoform 5 of Thioredoxin reductase 1, cytoplasmic OS=Homo sapiens GN=TXNRD1; Isoform 4 of Thioredoxin reductase 1, cytoplasmic OS=Homo sapiens GN=TXNRD1; Isoform 3 of Thioredoxin reductase 1, cytoplasmic OS=Homo sapiens GN=TXNRD1; Isoform 2 of Thio…	2	99	AIGDILEDK			cleaved Y-A@N-term	0.00070047	972.513	487.264	972.513	487.264	2	14	1.1.1.2247.8	32.6353	28285.8	27195.5	32.62	0.25	4353.82
1	sp|Q16881|TRXR1_DROME; sp|Q16881-6|TRXR1_DROME; sp|Q16881-5|TRXR1_DROME; sp|Q16881-4|TRXR1_DROME; sp|Q16881-3|TRXR1_DROME; sp|Q16881-2|TRXR1_DROME	Thioredoxin reductase 1, cytoplasmic OS=Homo sapiens GN=TXNRD1 PE=1 SV=3; Isoform 6 of Thioredoxin reductase 1, cytoplasmic OS=Homo sapiens GN=TXNRD1; Isoform 5 of Thioredoxin reductase 1, cytoplasmic OS=Homo sapiens GN=TXNRD1; Isoform 4 of Thioredoxin reductase 1, cytoplasmic OS=Homo sapiens GN=TXNRD1; Isoform 3 of Thioredoxin reductase 1, cytoplasmic OS=Homo sapiens GN=TXNRD1; Isoform 2 of Thio…	2	99	AIGDILEDKVELTPV			cleaved Y-A@N-term; cleaved V-A@C-term; missed K-V@9	0.00273587	1610.88	806.447	1610.88	806.446	2	14	1.1.1.2486.12	44.3764	7490.22	6332.32	44.35	0.1	1784.72
1	sp|Q16881|TRXR1_DROME; sp|Q16881-6|TRXR1_DROME; sp|Q16881-5|TRXR1_DROME; sp|Q16881-4|TRXR1_DROME; sp|Q16881-3|TRXR1_DROME; sp|Q16881-2|TRXR1_DROME	Thioredoxin reductase 1, cytoplasmic OS=Homo sapiens GN=TXNRD1 PE=1 SV=3; Isoform 6 of Thioredoxin reductase 1, cytoplasmic OS=Homo sapiens GN=TXNRD1; Isoform 5 of Thioredoxin reductase 1, cytoplasmic OS=Homo sapiens GN=TXNRD1; Isoform 4 of Thioredoxin reductase 1, cytoplasmic OS=Homo sapiens GN=TXNRD1; Isoform 3 of Thioredoxin reductase 1, cytoplasmic OS=Homo sapiens GN=TXNRD1; Isoform 2 of Thio…	2	99	AIGDILEDKVELTPVAIQ			cleaved Y-A@N-term; cleaved Q-A@C-term; missed K-V@9	-3.72491e-05	1923.06	642.026	1923.06	642.026	3	17	1.1.1.2496.13	44.8716	119692	97792.4	44.84	0.1	13441.9
1	sp|Q16881|TRXR1_DROME; sp|Q16881-6|TRXR1_DROME; sp|Q16881-5|TRXR1_DROME; sp|Q16881-4|TRXR1_DROME; sp|Q16881-3|TRXR1_DROME; sp|Q16881-2|TRXR1_DROME	Thioredoxin reductase 1, cytoplasmic OS=Homo sapiens GN=TXNRD1 PE=1 SV=3; Isoform 6 of Thioredoxin reductase 1, cytoplasmic OS=Homo sapiens GN=TXNRD1; Isoform 5 of Thioredoxin reductase 1, cytoplasmic OS=Homo sapiens GN=TXNRD1; Isoform 4 of Thioredoxin reductase 1, cytoplasmic OS=Homo sapiens GN=TXNRD1; Isoform 3 of Thioredoxin reductase 1, cytoplasmic OS=Homo sapiens GN=TXNRD1; Isoform 2 of Thio…	2	99	AIGDILEDKVELTPVAIQAGR			cleaved Y-A@N-term; missed K-V@9	-0.0024985	2207.21	736.745	2207.22	736.746	3	18	1.1.1.2481.12	44.1298	470499	7093.16	43.75	0.15	2017.39
1	sp|Q16881|TRXR1_DROME; sp|Q16881-6|TRXR1_DROME; sp|Q16881-5|TRXR1_DROME; sp|Q16881-4|TRXR1_DROME; sp|Q16881-3|TRXR1_DROME; sp|Q16881-2|TRXR1_DROME	Thioredoxin reductase 1, cytoplasmic OS=Homo sapiens GN=TXNRD1 PE=1 SV=3; Isoform 6 of Thioredoxin reductase 1, cytoplasmic OS=Homo sapiens GN=TXNRD1; Isoform 5 of Thioredoxin reductase 1, cytoplasmic OS=Homo sapiens GN=TXNRD1; Isoform 4 of Thioredoxin reductase 1, cytoplasmic OS=Homo sapiens GN=TXNRD1; Isoform 3 of Thioredoxin reductase 1, cytoplasmic OS=Homo sapiens GN=TXNRD1; Isoform 2 of Thio…	2	99	CDYENVPTTVFTPLEYGAC	Carbamidomethyl(C)@1; Carbamidomethyl(C)@19		cleaved C-G@C-term	0.00423934	2234.95	745.992	2234.95	745.991	3	16	1.1.1.2506.6	45.3614	7048.33	6340.06	45.34	0.1	1902.34
1	sp|Q16881|TRXR1_DROME; sp|Q16881-6|TRXR1_DROME; sp|Q16881-5|TRXR1_DROME; sp|Q16881-4|TRXR1_DROME; sp|Q16881-3|TRXR1_DROME; sp|Q16881-2|TRXR1_DROME	Thioredoxin reductase 1, cytoplasmic OS=Homo sapiens GN=TXNRD1 PE=1 SV=3; Isoform 6 of Thioredoxin reductase 1, cytoplasmic OS=Homo sapiens GN=TXNRD1; Isoform 5 of Thioredoxin reductase 1, cytoplasmic OS=Homo sapiens GN=TXNRD1; Isoform 4 of Thioredoxin reductase 1, cytoplasmic OS=Homo sapiens GN=TXNRD1; Isoform 3 of Thioredoxin reductase 1, cytoplasmic OS=Homo sapiens GN=TXNRD1; Isoform 2 of Thio…	2	99	CDYENVPTTVFTPLEYGACGLSEEK	Carbamidomethyl(C)@1; Ammonia-loss(N)@5; Carbamidomethyl(C)@19			0.000316267	2861.24	954.755	2861.24	954.754	3	14	1.1.1.2531.12	46.6172	20511.7	9535.73	46.53	0.1	1763.46
1	sp|Q16881|TRXR1_DROME; sp|Q16881-6|TRXR1_DROME; sp|Q16881-5|TRXR1_DROME; sp|Q16881-4|TRXR1_DROME; sp|Q16881-3|TRXR1_DROME; sp|Q16881-2|TRXR1_DROME	Thioredoxin reductase 1, cytoplasmic OS=Homo sapiens GN=TXNRD1 PE=1 SV=3; Isoform 6 of Thioredoxin reductase 1, cytoplasmic OS=Homo sapiens GN=TXNRD1; Isoform 5 of Thioredoxin reductase 1, cytoplasmic OS=Homo sapiens GN=TXNRD1; Isoform 4 of Thioredoxin reductase 1, cytoplasmic OS=Homo sapiens GN=TXNRD1; Isoform 3 of Thioredoxin reductase 1, cytoplasmic OS=Homo sapiens GN=TXNRD1; Isoform 2 of Thio…	2	99	DFVTPTPLGTR			cleaved L-D@N-term	-0.000462829	1202.63	602.322	1202.63	602.322	2	13	1.1.1.2286.16	34.5726	86824.7	40655.3	34.45	0.2	7238.28
1	sp|Q16881|TRXR1_DROME; sp|Q16881-6|TRXR1_DROME; sp|Q16881-5|TRXR1_DROME; sp|Q16881-4|TRXR1_DROME; sp|Q16881-3|TRXR1_DROME; sp|Q16881-2|TRXR1_DROME	Thioredoxin reductase 1, cytoplasmic OS=Homo sapiens GN=TXNRD1 PE=1 SV=3; Isoform 6 of Thioredoxin reductase 1, cytoplasmic OS=Homo sapiens GN=TXNRD1; Isoform 5 of Thioredoxin reductase 1, cytoplasmic OS=Homo sapiens GN=TXNRD1; Isoform 4 of Thioredoxin reductase 1, cytoplasmic OS=Homo sapiens GN=TXNRD1; Isoform 3 of Thioredoxin reductase 1, cytoplasmic OS=Homo sapiens GN=TXNRD1; Isoform 2 of Thio…	2	99	FLIATGER			cleaved R-P@C-term	0.000420191	905.497	453.756	905.497	453.756	2	10	1.1.1.2126.3	26.6743	8017.54	7957.62	26.71	0.29	2505.05
1	sp|Q16881|TRXR1_DROME; sp|Q16881-6|TRXR1_DROME; sp|Q16881-5|TRXR1_DROME; sp|Q16881-4|TRXR1_DROME; sp|Q16881-3|TRXR1_DROME; sp|Q16881-2|TRXR1_DROME	Thioredoxin reductase 1, cytoplasmic OS=Homo sapiens GN=TXNRD1 PE=1 SV=3; Isoform 6 of Thioredoxin reductase 1, cytoplasmic OS=Homo sapiens GN=TXNRD1; Isoform 5 of Thioredoxin reductase 1, cytoplasmic OS=Homo sapiens GN=TXNRD1; Isoform 4 of Thioredoxin reductase 1, cytoplasmic OS=Homo sapiens GN=TXNRD1; Isoform 3 of Thioredoxin reductase 1, cytoplasmic OS=Homo sapiens GN=TXNRD1; Isoform 2 of Thio…	2	99	FLIATGERPR				0.000871615	1158.65	580.333	1158.65	580.333	2	16	1.1.1.2085.18	24.6737	207126	149345	24.54	0.3	28483.4
1	sp|Q16881|TRXR1_DROME; sp|Q16881-6|TRXR1_DROME; sp|Q16881-5|TRXR1_DROME; sp|Q16881-4|TRXR1_DROME; sp|Q16881-3|TRXR1_DROME; sp|Q16881-2|TRXR1_DROME	Thioredoxin reductase 1, cytoplasmic OS=Homo sapiens GN=TXNRD1 PE=1 SV=3; Isoform 6 of Thioredoxin reductase 1, cytoplasmic OS=Homo sapiens GN=TXNRD1; Isoform 5 of Thioredoxin reductase 1, cytoplasmic OS=Homo sapiens GN=TXNRD1; Isoform 4 of Thioredoxin reductase 1, cytoplasmic OS=Homo sapiens GN=TXNRD1; Isoform 3 of Thioredoxin reductase 1, cytoplasmic OS=Homo sapiens GN=TXNRD1; Isoform 2 of Thio…	2	99	FWPLEWTIPSR			cleaved Y-F@N-term	-0.00199691	1430.73	716.374	1430.73	716.375	2	10	1.1.1.2519.10	46.0038	5380.4	4841.99	46.08	0.25	987.212
1	sp|Q16881|TRXR1_DROME; sp|Q16881-6|TRXR1_DROME; sp|Q16881-5|TRXR1_DROME; sp|Q16881-4|TRXR1_DROME; sp|Q16881-3|TRXR1_DROME; sp|Q16881-2|TRXR1_DROME	Thioredoxin reductase 1, cytoplasmic OS=Homo sapiens GN=TXNRD1 PE=1 SV=3; Isoform 6 of Thioredoxin reductase 1, cytoplasmic OS=Homo sapiens GN=TXNRD1; Isoform 5 of Thioredoxin reductase 1, cytoplasmic OS=Homo sapiens GN=TXNRD1; Isoform 4 of Thioredoxin reductase 1, cytoplasmic OS=Homo sapiens GN=TXNRD1; Isoform 3 of Thioredoxin reductase 1, cytoplasmic OS=Homo sapiens GN=TXNRD1; Isoform 2 of Thio…	2	99	GFDQDMANK				0.000408887	1024.43	513.222	1024.43	513.221	2	15	1.1.1.1954.8	18.346	192241	48877.1	18.12	0.25	7855.35
1	sp|Q16881|TRXR1_DROME; sp|Q16881-6|TRXR1_DROME; sp|Q16881-5|TRXR1_DROME; sp|Q16881-4|TRXR1_DROME; sp|Q16881-3|TRXR1_DROME; sp|Q16881-2|TRXR1_DROME	Thioredoxin reductase 1, cytoplasmic OS=Homo sapiens GN=TXNRD1 PE=1 SV=3; Isoform 6 of Thioredoxin reductase 1, cytoplasmic OS=Homo sapiens GN=TXNRD1; Isoform 5 of Thioredoxin reductase 1, cytoplasmic OS=Homo sapiens GN=TXNRD1; Isoform 4 of Thioredoxin reductase 1, cytoplasmic OS=Homo sapiens GN=TXNRD1; Isoform 3 of Thioredoxin reductase 1, cytoplasmic OS=Homo sapiens GN=TXNRD1; Isoform 2 of Thio…	2	99	GLGGTCVNVGCIPK	Carbamidomethyl(C)@6; Carbamidomethyl(C)@11		cleaved W-G@N-term	0.000494943	1430.7	716.358	1430.7	716.358	2	19	1.1.1.2276.9	34.0869	14399.8	9453.7	34	0.2	2194.98
1	sp|Q16881|TRXR1_DROME; sp|Q16881-6|TRXR1_DROME; sp|Q16881-5|TRXR1_DROME; sp|Q16881-4|TRXR1_DROME; sp|Q16881-3|TRXR1_DROME; sp|Q16881-2|TRXR1_DROME	Thioredoxin reductase 1, cytoplasmic OS=Homo sapiens GN=TXNRD1 PE=1 SV=3; Isoform 6 of Thioredoxin reductase 1, cytoplasmic OS=Homo sapiens GN=TXNRD1; Isoform 5 of Thioredoxin reductase 1, cytoplasmic OS=Homo sapiens GN=TXNRD1; Isoform 4 of Thioredoxin reductase 1, cytoplasmic OS=Homo sapiens GN=TXNRD1; Isoform 3 of Thioredoxin reductase 1, cytoplasmic OS=Homo sapiens GN=TXNRD1; Isoform 2 of Thio…	2	99	GPNAGEVTQGFAAALK			cleaved L-G@N-term	-0.000998017	1529.78	765.899	1529.78	765.899	2	25	1.1.1.2391.10	39.706	20554	19178.3	39.67	0.2	5228.35
1	sp|Q16881|TRXR1_DROME; sp|Q16881-6|TRXR1_DROME; sp|Q16881-5|TRXR1_DROME; sp|Q16881-4|TRXR1_DROME; sp|Q16881-3|TRXR1_DROME; sp|Q16881-2|TRXR1_DROME	Thioredoxin reductase 1, cytoplasmic OS=Homo sapiens GN=TXNRD1 PE=1 SV=3; Isoform 6 of Thioredoxin reductase 1, cytoplasmic OS=Homo sapiens GN=TXNRD1; Isoform 5 of Thioredoxin reductase 1, cytoplasmic OS=Homo sapiens GN=TXNRD1; Isoform 4 of Thioredoxin reductase 1, cytoplasmic OS=Homo sapiens GN=TXNRD1; Isoform 3 of Thioredoxin reductase 1, cytoplasmic OS=Homo sapiens GN=TXNRD1; Isoform 2 of Thio…	2	99	HSYFWPLEW			cleaved Y-H@N-term; cleaved W-T@C-term	-0.00142333	1263.57	632.792	1263.57	632.793	2	11	1.1.1.2533.3	46.6823	91873.5	86475.3	46.63	0.15	5041.14
1	sp|Q16881|TRXR1_DROME; sp|Q16881-6|TRXR1_DROME; sp|Q16881-5|TRXR1_DROME; sp|Q16881-4|TRXR1_DROME; sp|Q16881-3|TRXR1_DROME; sp|Q16881-2|TRXR1_DROME	Thioredoxin reductase 1, cytoplasmic OS=Homo sapiens GN=TXNRD1 PE=1 SV=3; Isoform 6 of Thioredoxin reductase 1, cytoplasmic OS=Homo sapiens GN=TXNRD1; Isoform 5 of Thioredoxin reductase 1, cytoplasmic OS=Homo sapiens GN=TXNRD1; Isoform 4 of Thioredoxin reductase 1, cytoplasmic OS=Homo sapiens GN=TXNRD1; Isoform 3 of Thioredoxin reductase 1, cytoplasmic OS=Homo sapiens GN=TXNRD1; Isoform 2 of Thio…	2	99	HVLGPNAGEVTQGF			cleaved F-H@N-term; cleaved F-A@C-term	-0.00149774	1424.7	713.359	1424.7	713.36	2	21	1.1.1.2288.21	34.6796	97711	69393.8	34.6	0.15	10732
1	sp|Q16881|TRXR1_DROME; sp|Q16881-6|TRXR1_DROME; sp|Q16881-5|TRXR1_DROME; sp|Q16881-4|TRXR1_DROME; sp|Q16881-3|TRXR1_DROME; sp|Q16881-2|TRXR1_DROME	Thioredoxin reductase 1, cytoplasmic OS=Homo sapiens GN=TXNRD1 PE=1 SV=3; Isoform 6 of Thioredoxin reductase 1, cytoplasmic OS=Homo sapiens GN=TXNRD1; Isoform 5 of Thioredoxin reductase 1, cytoplasmic OS=Homo sapiens GN=TXNRD1; Isoform 4 of Thioredoxin reductase 1, cytoplasmic OS=Homo sapiens GN=TXNRD1; Isoform 3 of Thioredoxin reductase 1, cytoplasmic OS=Homo sapiens GN=TXNRD1; Isoform 2 of Thio…	2	99	HVLGPNAGEVTQGFAA			cleaved F-H@N-term; cleaved A-A@C-term	-0.000272507	1566.78	784.397	1566.78	784.397	2	21	1.1.1.2296.18	35.0819	29943.5	29903.8	35.08	0.15	6086.52
1	sp|Q16881|TRXR1_DROME; sp|Q16881-6|TRXR1_DROME; sp|Q16881-5|TRXR1_DROME; sp|Q16881-4|TRXR1_DROME; sp|Q16881-3|TRXR1_DROME; sp|Q16881-2|TRXR1_DROME	Thioredoxin reductase 1, cytoplasmic OS=Homo sapiens GN=TXNRD1 PE=1 SV=3; Isoform 6 of Thioredoxin reductase 1, cytoplasmic OS=Homo sapiens GN=TXNRD1; Isoform 5 of Thioredoxin reductase 1, cytoplasmic OS=Homo sapiens GN=TXNRD1; Isoform 4 of Thioredoxin reductase 1, cytoplasmic OS=Homo sapiens GN=TXNRD1; Isoform 3 of Thioredoxin reductase 1, cytoplasmic OS=Homo sapiens GN=TXNRD1; Isoform 2 of Thio…	2	99	HVLGPNAGEVTQGFAAALK			cleaved F-H@N-term	0.000616095	1879	627.339	1879	627.339	3	22	1.1.1.2425.7	41.3582	24592.2	18269.3	41.29	0.15	2279.96
1	sp|Q16881|TRXR1_DROME; sp|Q16881-6|TRXR1_DROME; sp|Q16881-5|TRXR1_DROME; sp|Q16881-4|TRXR1_DROME; sp|Q16881-3|TRXR1_DROME; sp|Q16881-2|TRXR1_DROME	Thioredoxin reductase 1, cytoplasmic OS=Homo sapiens GN=TXNRD1 PE=1 SV=3; Isoform 6 of Thioredoxin reductase 1, cytoplasmic OS=Homo sapiens GN=TXNRD1; Isoform 5 of Thioredoxin reductase 1, cytoplasmic OS=Homo sapiens GN=TXNRD1; Isoform 4 of Thioredoxin reductase 1, cytoplasmic OS=Homo sapiens GN=TXNRD1; Isoform 3 of Thioredoxin reductase 1, cytoplasmic OS=Homo sapiens GN=TXNRD1; Isoform 2 of Thio…	2	99	IGLETVGVK				0.000801586	914.544	458.279	914.544	458.279	2	15	1.1.1.2176.4	29.1343	417172	401289	29.12	0.2	70823.9
1	sp|Q16881|TRXR1_DROME; sp|Q16881-6|TRXR1_DROME; sp|Q16881-5|TRXR1_DROME; sp|Q16881-4|TRXR1_DROME; sp|Q16881-3|TRXR1_DROME; sp|Q16881-2|TRXR1_DROME	Thioredoxin reductase 1, cytoplasmic OS=Homo sapiens GN=TXNRD1 PE=1 SV=3; Isoform 6 of Thioredoxin reductase 1, cytoplasmic OS=Homo sapiens GN=TXNRD1; Isoform 5 of Thioredoxin reductase 1, cytoplasmic OS=Homo sapiens GN=TXNRD1; Isoform 4 of Thioredoxin reductase 1, cytoplasmic OS=Homo sapiens GN=TXNRD1; Isoform 3 of Thioredoxin reductase 1, cytoplasmic OS=Homo sapiens GN=TXNRD1; Isoform 2 of Thio…	2	99	IPVTDEEQTNVPYIY			cleaved Y-A@C-term	0.00131792	1779.86	890.936	1779.86	890.936	2	15	1.1.1.2457.19	42.956	180064	23183.3	42.78	0.15	2752.94
1	sp|Q16881|TRXR1_DROME; sp|Q16881-6|TRXR1_DROME; sp|Q16881-5|TRXR1_DROME; sp|Q16881-4|TRXR1_DROME; sp|Q16881-3|TRXR1_DROME; sp|Q16881-2|TRXR1_DROME	Thioredoxin reductase 1, cytoplasmic OS=Homo sapiens GN=TXNRD1 PE=1 SV=3; Isoform 6 of Thioredoxin reductase 1, cytoplasmic OS=Homo sapiens GN=TXNRD1; Isoform 5 of Thioredoxin reductase 1, cytoplasmic OS=Homo sapiens GN=TXNRD1; Isoform 4 of Thioredoxin reductase 1, cytoplasmic OS=Homo sapiens GN=TXNRD1; Isoform 3 of Thioredoxin reductase 1, cytoplasmic OS=Homo sapiens GN=TXNRD1; Isoform 2 of Thio…	2	99	IYAIGDILEDKVELTPVAIQ			cleaved Y-I@N-term; cleaved Q-A@C-term; missed K-V@11	-0.00086926	2199.2	734.075	2199.2	734.075	3	18	1.1.1.2524.7	46.2455	87723.1	74761.4	46.19	0.1	5971.9
1	sp|Q16881|TRXR1_DROME; sp|Q16881-6|TRXR1_DROME; sp|Q16881-5|TRXR1_DROME; sp|Q16881-4|TRXR1_DROME; sp|Q16881-3|TRXR1_DROME; sp|Q16881-2|TRXR1_DROME	Thioredoxin reductase 1, cytoplasmic OS=Homo sapiens GN=TXNRD1 PE=1 SV=3; Isoform 6 of Thioredoxin reductase 1, cytoplasmic OS=Homo sapiens GN=TXNRD1; Isoform 5 of Thioredoxin reductase 1, cytoplasmic OS=Homo sapiens GN=TXNRD1; Isoform 4 of Thioredoxin reductase 1, cytoplasmic OS=Homo sapiens GN=TXNRD1; Isoform 3 of Thioredoxin reductase 1, cytoplasmic OS=Homo sapiens GN=TXNRD1; Isoform 2 of Thio…	2	99	IYAIGDILEDKVELTPVAIQAGR			cleaved Y-I@N-term; missed K-V@11	-0.000807562	2483.36	828.795	2483.36	828.795	3	18	1.1.1.2532.12	46.6578	2889.18	2410.57	46.62	0.3	1205.82
1	sp|Q16881|TRXR1_DROME; sp|Q16881-6|TRXR1_DROME; sp|Q16881-5|TRXR1_DROME; sp|Q16881-4|TRXR1_DROME; sp|Q16881-3|TRXR1_DROME; sp|Q16881-2|TRXR1_DROME	Thioredoxin reductase 1, cytoplasmic OS=Homo sapiens GN=TXNRD1 PE=1 SV=3; Isoform 6 of Thioredoxin reductase 1, cytoplasmic OS=Homo sapiens GN=TXNRD1; Isoform 5 of Thioredoxin reductase 1, cytoplasmic OS=Homo sapiens GN=TXNRD1; Isoform 4 of Thioredoxin reductase 1, cytoplasmic OS=Homo sapiens GN=TXNRD1; Isoform 3 of Thioredoxin reductase 1, cytoplasmic OS=Homo sapiens GN=TXNRD1; Isoform 2 of Thio…	2	99	KIGLETVGVK			missed K-I@1	0.000373447	1042.64	522.327	1042.64	522.327	2	17	1.1.1.2097.11	25.2525	282553	87138.2	25.08	0.25	13013
1	sp|Q16881|TRXR1_DROME; sp|Q16881-6|TRXR1_DROME; sp|Q16881-5|TRXR1_DROME; sp|Q16881-4|TRXR1_DROME; sp|Q16881-3|TRXR1_DROME; sp|Q16881-2|TRXR1_DROME	Thioredoxin reductase 1, cytoplasmic OS=Homo sapiens GN=TXNRD1 PE=1 SV=3; Isoform 6 of Thioredoxin reductase 1, cytoplasmic OS=Homo sapiens GN=TXNRD1; Isoform 5 of Thioredoxin reductase 1, cytoplasmic OS=Homo sapiens GN=TXNRD1; Isoform 4 of Thioredoxin reductase 1, cytoplasmic OS=Homo sapiens GN=TXNRD1; Isoform 3 of Thioredoxin reductase 1, cytoplasmic OS=Homo sapiens GN=TXNRD1; Isoform 2 of Thio…	2	99	KLMHQAALLGQALQDSR			missed K-L@1	0.000477201	1879.01	627.344	1879.01	627.344	3	26	1.1.1.2266.11	33.5795	115978	103089	33.61	0.3	31866.6
1	sp|Q16881|TRXR1_DROME; sp|Q16881-6|TRXR1_DROME; sp|Q16881-5|TRXR1_DROME; sp|Q16881-4|TRXR1_DROME; sp|Q16881-3|TRXR1_DROME; sp|Q16881-2|TRXR1_DROME	Thioredoxin reductase 1, cytoplasmic OS=Homo sapiens GN=TXNRD1 PE=1 SV=3; Isoform 6 of Thioredoxin reductase 1, cytoplasmic OS=Homo sapiens GN=TXNRD1; Isoform 5 of Thioredoxin reductase 1, cytoplasmic OS=Homo sapiens GN=TXNRD1; Isoform 4 of Thioredoxin reductase 1, cytoplasmic OS=Homo sapiens GN=TXNRD1; Isoform 3 of Thioredoxin reductase 1, cytoplasmic OS=Homo sapiens GN=TXNRD1; Isoform 2 of Thio…	2	99	KVMVLDFVTPTPL			cleaved L-G@C-term; missed K-V@1	-0.00011338	1458.82	730.415	1458.82	730.415	2	14	1.1.1.2503.7	45.2066	68571.5	47877.7	45.15	0.1	3839.42
1	sp|Q16881|TRXR1_DROME; sp|Q16881-6|TRXR1_DROME; sp|Q16881-5|TRXR1_DROME; sp|Q16881-4|TRXR1_DROME; sp|Q16881-3|TRXR1_DROME; sp|Q16881-2|TRXR1_DROME	Thioredoxin reductase 1, cytoplasmic OS=Homo sapiens GN=TXNRD1 PE=1 SV=3; Isoform 6 of Thioredoxin reductase 1, cytoplasmic OS=Homo sapiens GN=TXNRD1; Isoform 5 of Thioredoxin reductase 1, cytoplasmic OS=Homo sapiens GN=TXNRD1; Isoform 4 of Thioredoxin reductase 1, cytoplasmic OS=Homo sapiens GN=TXNRD1; Isoform 3 of Thioredoxin reductase 1, cytoplasmic OS=Homo sapiens GN=TXNRD1; Isoform 2 of Thio…	2	99	KVMVLDFVTPTPLGTR			missed K-V@1	0.0022839	1772.99	592.003	1772.99	592.003	3	22	1.1.1.2462.8	43.1833	407059	398557	43.21	0.1	95726.6
1	sp|Q16881|TRXR1_DROME; sp|Q16881-6|TRXR1_DROME; sp|Q16881-5|TRXR1_DROME; sp|Q16881-4|TRXR1_DROME; sp|Q16881-3|TRXR1_DROME; sp|Q16881-2|TRXR1_DROME	Thioredoxin reductase 1, cytoplasmic OS=Homo sapiens GN=TXNRD1 PE=1 SV=3; Isoform 6 of Thioredoxin reductase 1, cytoplasmic OS=Homo sapiens GN=TXNRD1; Isoform 5 of Thioredoxin reductase 1, cytoplasmic OS=Homo sapiens GN=TXNRD1; Isoform 4 of Thioredoxin reductase 1, cytoplasmic OS=Homo sapiens GN=TXNRD1; Isoform 3 of Thioredoxin reductase 1, cytoplasmic OS=Homo sapiens GN=TXNRD1; Isoform 2 of Thio…	2	99	KVVYENAYGQFIGPHR			missed K-V@1	0.0016452	1876.96	470.247	1876.96	470.247	4	21	1.1.1.2203.4	30.4641	71456.8	70893.5	30.46	0.25	28210.4
1	sp|Q16881|TRXR1_DROME; sp|Q16881-6|TRXR1_DROME; sp|Q16881-5|TRXR1_DROME; sp|Q16881-4|TRXR1_DROME; sp|Q16881-3|TRXR1_DROME; sp|Q16881-2|TRXR1_DROME	Thioredoxin reductase 1, cytoplasmic OS=Homo sapiens GN=TXNRD1 PE=1 SV=3; Isoform 6 of Thioredoxin reductase 1, cytoplasmic OS=Homo sapiens GN=TXNRD1; Isoform 5 of Thioredoxin reductase 1, cytoplasmic OS=Homo sapiens GN=TXNRD1; Isoform 4 of Thioredoxin reductase 1, cytoplasmic OS=Homo sapiens GN=TXNRD1; Isoform 3 of Thioredoxin reductase 1, cytoplasmic OS=Homo sapiens GN=TXNRD1; Isoform 2 of Thio…	2	99	LAGIGLDVTVM			cleaved F-L@N-term; cleaved M-V@C-term	0.00128606	1087.6	544.805	1087.59	544.805	2	11	1.1.1.2503.2	45.1982	9524.93	9367.37	45.19	0.15	1699.64
1	sp|Q16881|TRXR1_DROME; sp|Q16881-6|TRXR1_DROME; sp|Q16881-5|TRXR1_DROME; sp|Q16881-4|TRXR1_DROME; sp|Q16881-3|TRXR1_DROME; sp|Q16881-2|TRXR1_DROME	Thioredoxin reductase 1, cytoplasmic OS=Homo sapiens GN=TXNRD1 PE=1 SV=3; Isoform 6 of Thioredoxin reductase 1, cytoplasmic OS=Homo sapiens GN=TXNRD1; Isoform 5 of Thioredoxin reductase 1, cytoplasmic OS=Homo sapiens GN=TXNRD1; Isoform 4 of Thioredoxin reductase 1, cytoplasmic OS=Homo sapiens GN=TXNRD1; Isoform 3 of Thioredoxin reductase 1, cytoplasmic OS=Homo sapiens GN=TXNRD1; Isoform 2 of Thio…	2	99	LAGIGLDVTVMVR			cleaved F-L@N-term	-0.00774906	1342.76	672.386	1342.76	672.389	2	10	1.1.1.2551.5	47.5831	1054.61	980.91	47.57	0.4	720.479
1	sp|Q16881|TRXR1_DROME; sp|Q16881-6|TRXR1_DROME; sp|Q16881-5|TRXR1_DROME; sp|Q16881-4|TRXR1_DROME; sp|Q16881-3|TRXR1_DROME; sp|Q16881-2|TRXR1_DROME	Thioredoxin reductase 1, cytoplasmic OS=Homo sapiens GN=TXNRD1 PE=1 SV=3; Isoform 6 of Thioredoxin reductase 1, cytoplasmic OS=Homo sapiens GN=TXNRD1; Isoform 5 of Thioredoxin reductase 1, cytoplasmic OS=Homo sapiens GN=TXNRD1; Isoform 4 of Thioredoxin reductase 1, cytoplasmic OS=Homo sapiens GN=TXNRD1; Isoform 3 of Thioredoxin reductase 1, cytoplasmic OS=Homo sapiens GN=TXNRD1; Isoform 2 of Thio…	2	99	LMHQAALLGQALQDSR				0.00105291	1750.92	584.646	1750.91	584.646	3	22	1.1.1.2335.9	36.9298	468444	430557	36.91	0.1	132728
1	sp|Q16881|TRXR1_DROME; sp|Q16881-6|TRXR1_DROME; sp|Q16881-5|TRXR1_DROME; sp|Q16881-4|TRXR1_DROME; sp|Q16881-3|TRXR1_DROME; sp|Q16881-2|TRXR1_DROME	Thioredoxin reductase 1, cytoplasmic OS=Homo sapiens GN=TXNRD1 PE=1 SV=3; Isoform 6 of Thioredoxin reductase 1, cytoplasmic OS=Homo sapiens GN=TXNRD1; Isoform 5 of Thioredoxin reductase 1, cytoplasmic OS=Homo sapiens GN=TXNRD1; Isoform 4 of Thioredoxin reductase 1, cytoplasmic OS=Homo sapiens GN=TXNRD1; Isoform 3 of Thioredoxin reductase 1, cytoplasmic OS=Homo sapiens GN=TXNRD1; Isoform 2 of Thio…	2	99	MIEAVQNHIGSL			cleaved L-N@C-term	-0.00114184	1310.66	656.339	1310.67	656.34	2	20	1.1.1.2313.13	35.897	148859	111638	35.82	0.25	19062.9
1	sp|Q16881|TRXR1_DROME; sp|Q16881-6|TRXR1_DROME; sp|Q16881-5|TRXR1_DROME; sp|Q16881-4|TRXR1_DROME; sp|Q16881-3|TRXR1_DROME; sp|Q16881-2|TRXR1_DROME	Thioredoxin reductase 1, cytoplasmic OS=Homo sapiens GN=TXNRD1 PE=1 SV=3; Isoform 6 of Thioredoxin reductase 1, cytoplasmic OS=Homo sapiens GN=TXNRD1; Isoform 5 of Thioredoxin reductase 1, cytoplasmic OS=Homo sapiens GN=TXNRD1; Isoform 4 of Thioredoxin reductase 1, cytoplasmic OS=Homo sapiens GN=TXNRD1; Isoform 3 of Thioredoxin reductase 1, cytoplasmic OS=Homo sapiens GN=TXNRD1; Isoform 2 of Thio…	2	99	MIEAVQNHIGSLNW	Deamidated(N)@7		cleaved W-G@C-term	0.00457298	1611.78	806.895	1611.77	806.893	2	20	1.1.1.2461.21	43.1557	61957.4	50920.4	43.12	0.1	6474.52
1	sp|Q16881|TRXR1_DROME; sp|Q16881-6|TRXR1_DROME; sp|Q16881-5|TRXR1_DROME; sp|Q16881-4|TRXR1_DROME; sp|Q16881-3|TRXR1_DROME; sp|Q16881-2|TRXR1_DROME	Thioredoxin reductase 1, cytoplasmic OS=Homo sapiens GN=TXNRD1 PE=1 SV=3; Isoform 6 of Thioredoxin reductase 1, cytoplasmic OS=Homo sapiens GN=TXNRD1; Isoform 5 of Thioredoxin reductase 1, cytoplasmic OS=Homo sapiens GN=TXNRD1; Isoform 4 of Thioredoxin reductase 1, cytoplasmic OS=Homo sapiens GN=TXNRD1; Isoform 3 of Thioredoxin reductase 1, cytoplasmic OS=Homo sapiens GN=TXNRD1; Isoform 2 of Thio…	2	99	MIEAVQNHIGSLNWGYR				0.000809769	1986.97	663.332	1986.97	663.332	3	17	1.1.1.2424.9	41.3171	93452.4	42291.1	41.2	0.25	5031.48
1	sp|Q16881|TRXR1_DROME; sp|Q16881-6|TRXR1_DROME; sp|Q16881-5|TRXR1_DROME; sp|Q16881-4|TRXR1_DROME; sp|Q16881-3|TRXR1_DROME; sp|Q16881-2|TRXR1_DROME	Thioredoxin reductase 1, cytoplasmic OS=Homo sapiens GN=TXNRD1 PE=1 SV=3; Isoform 6 of Thioredoxin reductase 1, cytoplasmic OS=Homo sapiens GN=TXNRD1; Isoform 5 of Thioredoxin reductase 1, cytoplasmic OS=Homo sapiens GN=TXNRD1; Isoform 4 of Thioredoxin reductase 1, cytoplasmic OS=Homo sapiens GN=TXNRD1; Isoform 3 of Thioredoxin reductase 1, cytoplasmic OS=Homo sapiens GN=TXNRD1; Isoform 2 of Thio…	2	99	NYGWKVEETVK			missed K-V@5	-0.000199401	1351.68	676.846	1351.68	676.846	2	19	1.1.1.2127.5	26.7333	11163.1	10325.6	26.71	0.25	1860.22
1	sp|Q16881|TRXR1_DROME; sp|Q16881-6|TRXR1_DROME; sp|Q16881-5|TRXR1_DROME; sp|Q16881-4|TRXR1_DROME; sp|Q16881-3|TRXR1_DROME; sp|Q16881-2|TRXR1_DROME	Thioredoxin reductase 1, cytoplasmic OS=Homo sapiens GN=TXNRD1 PE=1 SV=3; Isoform 6 of Thioredoxin reductase 1, cytoplasmic OS=Homo sapiens GN=TXNRD1; Isoform 5 of Thioredoxin reductase 1, cytoplasmic OS=Homo sapiens GN=TXNRD1; Isoform 4 of Thioredoxin reductase 1, cytoplasmic OS=Homo sapiens GN=TXNRD1; Isoform 3 of Thioredoxin reductase 1, cytoplasmic OS=Homo sapiens GN=TXNRD1; Isoform 2 of Thio…	2	99	NYGWKVEETVKHDWDR			missed K-V@5; missed K-H@11	-0.000902017	2060.97	687.997	2060.97	687.997	3	14	1.1.1.2283.11	34.4411	1563.52	1549.2	34.44	0.3	829.941
1	sp|Q16881|TRXR1_DROME; sp|Q16881-6|TRXR1_DROME; sp|Q16881-5|TRXR1_DROME; sp|Q16881-4|TRXR1_DROME; sp|Q16881-3|TRXR1_DROME; sp|Q16881-2|TRXR1_DROME	Thioredoxin reductase 1, cytoplasmic OS=Homo sapiens GN=TXNRD1 PE=1 SV=3; Isoform 6 of Thioredoxin reductase 1, cytoplasmic OS=Homo sapiens GN=TXNRD1; Isoform 5 of Thioredoxin reductase 1, cytoplasmic OS=Homo sapiens GN=TXNRD1; Isoform 4 of Thioredoxin reductase 1, cytoplasmic OS=Homo sapiens GN=TXNRD1; Isoform 3 of Thioredoxin reductase 1, cytoplasmic OS=Homo sapiens GN=TXNRD1; Isoform 2 of Thio…	2	99	QAALLGQALQDSR			cleaved H-Q@N-term	0.000510466	1369.73	685.873	1369.73	685.873	2	15	1.1.1.2263.24	33.4528	10771.8	7271.15	33.36	0.15	2056.15
1	sp|Q16881|TRXR1_DROME; sp|Q16881-6|TRXR1_DROME; sp|Q16881-5|TRXR1_DROME; sp|Q16881-4|TRXR1_DROME; sp|Q16881-3|TRXR1_DROME; sp|Q16881-2|TRXR1_DROME	Thioredoxin reductase 1, cytoplasmic OS=Homo sapiens GN=TXNRD1 PE=1 SV=3; Isoform 6 of Thioredoxin reductase 1, cytoplasmic OS=Homo sapiens GN=TXNRD1; Isoform 5 of Thioredoxin reductase 1, cytoplasmic OS=Homo sapiens GN=TXNRD1; Isoform 4 of Thioredoxin reductase 1, cytoplasmic OS=Homo sapiens GN=TXNRD1; Isoform 3 of Thioredoxin reductase 1, cytoplasmic OS=Homo sapiens GN=TXNRD1; Isoform 2 of Thio…	2	99	QFVPIKVEQIEAGTPGR	Gln->pyro-Glu@N-term		missed K-V@6	0.00592903	1851	926.505	1850.99	926.502	2	25	1.1.1.2461.25	43.1623	303018	247071	43.12	0.1	19581.3
1	sp|Q16881|TRXR1_DROME; sp|Q16881-6|TRXR1_DROME; sp|Q16881-5|TRXR1_DROME; sp|Q16881-4|TRXR1_DROME; sp|Q16881-3|TRXR1_DROME; sp|Q16881-2|TRXR1_DROME	Thioredoxin reductase 1, cytoplasmic OS=Homo sapiens GN=TXNRD1 PE=1 SV=3; Isoform 6 of Thioredoxin reductase 1, cytoplasmic OS=Homo sapiens GN=TXNRD1; Isoform 5 of Thioredoxin reductase 1, cytoplasmic OS=Homo sapiens GN=TXNRD1; Isoform 4 of Thioredoxin reductase 1, cytoplasmic OS=Homo sapiens GN=TXNRD1; Isoform 3 of Thioredoxin reductase 1, cytoplasmic OS=Homo sapiens GN=TXNRD1; Isoform 2 of Thio…	2	99	QLDSTIGIHPVCAEVF	Gln->pyro-Glu@N-term; Carbamidomethyl(C)@12		cleaved F-T@C-term	0.00198548	1767.85	884.933	1767.85	884.932	2	17	1.1.1.2511.19	45.6222	61557.8	47548.2	45.58	0.1	3252.75
1	sp|Q16881|TRXR1_DROME; sp|Q16881-6|TRXR1_DROME; sp|Q16881-5|TRXR1_DROME; sp|Q16881-4|TRXR1_DROME; sp|Q16881-3|TRXR1_DROME; sp|Q16881-2|TRXR1_DROME	Thioredoxin reductase 1, cytoplasmic OS=Homo sapiens GN=TXNRD1 PE=1 SV=3; Isoform 6 of Thioredoxin reductase 1, cytoplasmic OS=Homo sapiens GN=TXNRD1; Isoform 5 of Thioredoxin reductase 1, cytoplasmic OS=Homo sapiens GN=TXNRD1; Isoform 4 of Thioredoxin reductase 1, cytoplasmic OS=Homo sapiens GN=TXNRD1; Isoform 3 of Thioredoxin reductase 1, cytoplasmic OS=Homo sapiens GN=TXNRD1; Isoform 2 of Thio…	2	99	QLDSTIGIHPVCAEVFTTL	Gln->pyro-Glu@N-term; Carbamidomethyl(C)@12		cleaved L-S@C-term	1.06399e-05	2083.03	1042.52	2083.03	1042.52	2	16	1.1.1.2539.12	47.0071	34737.7	26711.5	46.97	0.1	3132.3
1	sp|Q16881|TRXR1_DROME; sp|Q16881-6|TRXR1_DROME; sp|Q16881-5|TRXR1_DROME; sp|Q16881-4|TRXR1_DROME; sp|Q16881-3|TRXR1_DROME; sp|Q16881-2|TRXR1_DROME	Thioredoxin reductase 1, cytoplasmic OS=Homo sapiens GN=TXNRD1 PE=1 SV=3; Isoform 6 of Thioredoxin reductase 1, cytoplasmic OS=Homo sapiens GN=TXNRD1; Isoform 5 of Thioredoxin reductase 1, cytoplasmic OS=Homo sapiens GN=TXNRD1; Isoform 4 of Thioredoxin reductase 1, cytoplasmic OS=Homo sapiens GN=TXNRD1; Isoform 3 of Thioredoxin reductase 1, cytoplasmic OS=Homo sapiens GN=TXNRD1; Isoform 2 of Thio…	2	99	SDDLFSLPYCPGK	Carbamidomethyl(C)@10		cleaved S-S@N-term	0.00062848	1497.68	749.848	1497.68	749.848	2	17	1.1.1.2456.13	42.895	87722.8	64547.2	42.93	0.15	8363.35
1	sp|Q16881|TRXR1_DROME; sp|Q16881-6|TRXR1_DROME; sp|Q16881-5|TRXR1_DROME; sp|Q16881-4|TRXR1_DROME; sp|Q16881-3|TRXR1_DROME; sp|Q16881-2|TRXR1_DROME	Thioredoxin reductase 1, cytoplasmic OS=Homo sapiens GN=TXNRD1 PE=1 SV=3; Isoform 6 of Thioredoxin reductase 1, cytoplasmic OS=Homo sapiens GN=TXNRD1; Isoform 5 of Thioredoxin reductase 1, cytoplasmic OS=Homo sapiens GN=TXNRD1; Isoform 4 of Thioredoxin reductase 1, cytoplasmic OS=Homo sapiens GN=TXNRD1; Isoform 3 of Thioredoxin reductase 1, cytoplasmic OS=Homo sapiens GN=TXNRD1; Isoform 2 of Thio…	2	99	STNSEEIIEGEYNTVML			cleaved Q-S@N-term; cleaved L-A@C-term	0.00232536	1927.87	964.944	1927.87	964.943	2	17	1.1.1.2489.16	44.5414	61515.8	46914	44.5	0.1	5796.29
1	sp|Q16881|TRXR1_DROME; sp|Q16881-6|TRXR1_DROME; sp|Q16881-5|TRXR1_DROME; sp|Q16881-4|TRXR1_DROME; sp|Q16881-3|TRXR1_DROME; sp|Q16881-2|TRXR1_DROME	Thioredoxin reductase 1, cytoplasmic OS=Homo sapiens GN=TXNRD1 PE=1 SV=3; Isoform 6 of Thioredoxin reductase 1, cytoplasmic OS=Homo sapiens GN=TXNRD1; Isoform 5 of Thioredoxin reductase 1, cytoplasmic OS=Homo sapiens GN=TXNRD1; Isoform 4 of Thioredoxin reductase 1, cytoplasmic OS=Homo sapiens GN=TXNRD1; Isoform 3 of Thioredoxin reductase 1, cytoplasmic OS=Homo sapiens GN=TXNRD1; Isoform 2 of Thio…	2	99	SYDYDLIIIGGGSGGLAAAK				0.000330733	1939.99	647.67	1939.99	647.67	3	13	1.1.1.2575.6	48.6757	3613.22	3064.59	48.96	0.84	565.061
1	sp|Q16881|TRXR1_DROME; sp|Q16881-6|TRXR1_DROME; sp|Q16881-5|TRXR1_DROME; sp|Q16881-4|TRXR1_DROME; sp|Q16881-3|TRXR1_DROME; sp|Q16881-2|TRXR1_DROME	Thioredoxin reductase 1, cytoplasmic OS=Homo sapiens GN=TXNRD1 PE=1 SV=3; Isoform 6 of Thioredoxin reductase 1, cytoplasmic OS=Homo sapiens GN=TXNRD1; Isoform 5 of Thioredoxin reductase 1, cytoplasmic OS=Homo sapiens GN=TXNRD1; Isoform 4 of Thioredoxin reductase 1, cytoplasmic OS=Homo sapiens GN=TXNRD1; Isoform 3 of Thioredoxin reductase 1, cytoplasmic OS=Homo sapiens GN=TXNRD1; Isoform 2 of Thio…	2	99	TGKIPVTDEEQTNVPYIYAIGDILEDKVELTPVAIQAGR			missed K-I@3; missed K-V@27	-0.00515308	4255.22	852.052	4255.23	852.053	5	13	1.1.1.2540.9	47.0518	10555.2	6349.99	46.98	0.1	1269.32
1	sp|Q16881|TRXR1_DROME; sp|Q16881-6|TRXR1_DROME; sp|Q16881-5|TRXR1_DROME; sp|Q16881-4|TRXR1_DROME; sp|Q16881-3|TRXR1_DROME; sp|Q16881-2|TRXR1_DROME	Thioredoxin reductase 1, cytoplasmic OS=Homo sapiens GN=TXNRD1 PE=1 SV=3; Isoform 6 of Thioredoxin reductase 1, cytoplasmic OS=Homo sapiens GN=TXNRD1; Isoform 5 of Thioredoxin reductase 1, cytoplasmic OS=Homo sapiens GN=TXNRD1; Isoform 4 of Thioredoxin reductase 1, cytoplasmic OS=Homo sapiens GN=TXNRD1; Isoform 3 of Thioredoxin reductase 1, cytoplasmic OS=Homo sapiens GN=TXNRD1; Isoform 2 of Thio…	2	99	TLVVGASYVAL			cleaved L-E@C-term	0.000450626	1091.62	546.819	1091.62	546.819	2	12	1.1.1.2476.3	43.8671	58035.7	32469	43.96	0.15	3280.14
1	sp|Q16881|TRXR1_DROME; sp|Q16881-6|TRXR1_DROME; sp|Q16881-5|TRXR1_DROME; sp|Q16881-4|TRXR1_DROME; sp|Q16881-3|TRXR1_DROME; sp|Q16881-2|TRXR1_DROME	Thioredoxin reductase 1, cytoplasmic OS=Homo sapiens GN=TXNRD1 PE=1 SV=3; Isoform 6 of Thioredoxin reductase 1, cytoplasmic OS=Homo sapiens GN=TXNRD1; Isoform 5 of Thioredoxin reductase 1, cytoplasmic OS=Homo sapiens GN=TXNRD1; Isoform 4 of Thioredoxin reductase 1, cytoplasmic OS=Homo sapiens GN=TXNRD1; Isoform 3 of Thioredoxin reductase 1, cytoplasmic OS=Homo sapiens GN=TXNRD1; Isoform 2 of Thio…	2	99	VELTPVAIQ			cleaved Q-A@C-term	0.000604922	968.555	485.285	968.554	485.284	2	13	1.1.1.2349.2	37.6129	2962.95	2245.95	37.7	0.15	471.096
1	sp|Q16881|TRXR1_DROME; sp|Q16881-6|TRXR1_DROME; sp|Q16881-5|TRXR1_DROME; sp|Q16881-4|TRXR1_DROME; sp|Q16881-3|TRXR1_DROME; sp|Q16881-2|TRXR1_DROME	Thioredoxin reductase 1, cytoplasmic OS=Homo sapiens GN=TXNRD1 PE=1 SV=3; Isoform 6 of Thioredoxin reductase 1, cytoplasmic OS=Homo sapiens GN=TXNRD1; Isoform 5 of Thioredoxin reductase 1, cytoplasmic OS=Homo sapiens GN=TXNRD1; Isoform 4 of Thioredoxin reductase 1, cytoplasmic OS=Homo sapiens GN=TXNRD1; Isoform 3 of Thioredoxin reductase 1, cytoplasmic OS=Homo sapiens GN=TXNRD1; Isoform 2 of Thio…	2	99	VELTPVAIQAGR				-0.000138837	1252.71	627.364	1252.71	627.364	2	18	1.1.1.2251.21	32.8552	52234.4	50722.5	32.87	0.15	12719.2
1	sp|Q16881|TRXR1_DROME; sp|Q16881-6|TRXR1_DROME; sp|Q16881-5|TRXR1_DROME; sp|Q16881-4|TRXR1_DROME; sp|Q16881-3|TRXR1_DROME; sp|Q16881-2|TRXR1_DROME	Thioredoxin reductase 1, cytoplasmic OS=Homo sapiens GN=TXNRD1 PE=1 SV=3; Isoform 6 of Thioredoxin reductase 1, cytoplasmic OS=Homo sapiens GN=TXNRD1; Isoform 5 of Thioredoxin reductase 1, cytoplasmic OS=Homo sapiens GN=TXNRD1; Isoform 4 of Thioredoxin reductase 1, cytoplasmic OS=Homo sapiens GN=TXNRD1; Isoform 3 of Thioredoxin reductase 1, cytoplasmic OS=Homo sapiens GN=TXNRD1; Isoform 2 of Thio…	2	99	VEQIEAGTPGR				0.000426164	1155.59	578.802	1155.59	578.801	2	17	1.1.1.1949.12	18.1139	57974	23020.3	17.93	0.2	4861.3
1	sp|Q16881|TRXR1_DROME; sp|Q16881-6|TRXR1_DROME; sp|Q16881-5|TRXR1_DROME; sp|Q16881-4|TRXR1_DROME; sp|Q16881-3|TRXR1_DROME; sp|Q16881-2|TRXR1_DROME	Thioredoxin reductase 1, cytoplasmic OS=Homo sapiens GN=TXNRD1 PE=1 SV=3; Isoform 6 of Thioredoxin reductase 1, cytoplasmic OS=Homo sapiens GN=TXNRD1; Isoform 5 of Thioredoxin reductase 1, cytoplasmic OS=Homo sapiens GN=TXNRD1; Isoform 4 of Thioredoxin reductase 1, cytoplasmic OS=Homo sapiens GN=TXNRD1; Isoform 3 of Thioredoxin reductase 1, cytoplasmic OS=Homo sapiens GN=TXNRD1; Isoform 2 of Thio…	2	99	VLDFVTPTPLGTR			cleaved M-V@N-term	0.000292869	1414.78	708.398	1414.78	708.398	2	15	1.1.1.2443.9	42.2467	8925.53	7642.33	42.22	0.15	3675.1
1	sp|Q16881|TRXR1_DROME; sp|Q16881-6|TRXR1_DROME; sp|Q16881-5|TRXR1_DROME; sp|Q16881-4|TRXR1_DROME; sp|Q16881-3|TRXR1_DROME; sp|Q16881-2|TRXR1_DROME	Thioredoxin reductase 1, cytoplasmic OS=Homo sapiens GN=TXNRD1 PE=1 SV=3; Isoform 6 of Thioredoxin reductase 1, cytoplasmic OS=Homo sapiens GN=TXNRD1; Isoform 5 of Thioredoxin reductase 1, cytoplasmic OS=Homo sapiens GN=TXNRD1; Isoform 4 of Thioredoxin reductase 1, cytoplasmic OS=Homo sapiens GN=TXNRD1; Isoform 3 of Thioredoxin reductase 1, cytoplasmic OS=Homo sapiens GN=TXNRD1; Isoform 2 of Thio…	2	99	VLGPNAGEVTQGFAAALK			cleaved H-V@N-term	0.00254026	1741.94	871.977	1741.94	871.975	2	22	1.1.1.2459.23	43.0598	65459.7	38649.7	42.98	0.1	4105.95
1	sp|Q16881|TRXR1_DROME; sp|Q16881-6|TRXR1_DROME; sp|Q16881-5|TRXR1_DROME; sp|Q16881-4|TRXR1_DROME; sp|Q16881-3|TRXR1_DROME; sp|Q16881-2|TRXR1_DROME	Thioredoxin reductase 1, cytoplasmic OS=Homo sapiens GN=TXNRD1 PE=1 SV=3; Isoform 6 of Thioredoxin reductase 1, cytoplasmic OS=Homo sapiens GN=TXNRD1; Isoform 5 of Thioredoxin reductase 1, cytoplasmic OS=Homo sapiens GN=TXNRD1; Isoform 4 of Thioredoxin reductase 1, cytoplasmic OS=Homo sapiens GN=TXNRD1; Isoform 3 of Thioredoxin reductase 1, cytoplasmic OS=Homo sapiens GN=TXNRD1; Isoform 2 of Thio…	2	99	VMVLDFVTPTPL			cleaved L-G@C-term	-0.00270686	1330.72	666.366	1330.72	666.368	2	16	1.1.1.2545.8	47.2856	363113	322400	47.32	0.1	37451.7
1	sp|Q16881|TRXR1_DROME; sp|Q16881-6|TRXR1_DROME; sp|Q16881-5|TRXR1_DROME; sp|Q16881-4|TRXR1_DROME; sp|Q16881-3|TRXR1_DROME; sp|Q16881-2|TRXR1_DROME	Thioredoxin reductase 1, cytoplasmic OS=Homo sapiens GN=TXNRD1 PE=1 SV=3; Isoform 6 of Thioredoxin reductase 1, cytoplasmic OS=Homo sapiens GN=TXNRD1; Isoform 5 of Thioredoxin reductase 1, cytoplasmic OS=Homo sapiens GN=TXNRD1; Isoform 4 of Thioredoxin reductase 1, cytoplasmic OS=Homo sapiens GN=TXNRD1; Isoform 3 of Thioredoxin reductase 1, cytoplasmic OS=Homo sapiens GN=TXNRD1; Isoform 2 of Thio…	2	99	VMVLDFVTPTPLGTR	Dehydrated(T)@10	Dehydrated(T)@197		0.0010498	1626.88	543.301	1626.88	543.301	3	9	1.1.1.2496.6	44.8599	17887	16172.8	44.84	0.1	501.568
1	sp|Q16881|TRXR1_DROME; sp|Q16881-6|TRXR1_DROME; sp|Q16881-5|TRXR1_DROME; sp|Q16881-4|TRXR1_DROME; sp|Q16881-3|TRXR1_DROME; sp|Q16881-2|TRXR1_DROME	Thioredoxin reductase 1, cytoplasmic OS=Homo sapiens GN=TXNRD1 PE=1 SV=3; Isoform 6 of Thioredoxin reductase 1, cytoplasmic OS=Homo sapiens GN=TXNRD1; Isoform 5 of Thioredoxin reductase 1, cytoplasmic OS=Homo sapiens GN=TXNRD1; Isoform 4 of Thioredoxin reductase 1, cytoplasmic OS=Homo sapiens GN=TXNRD1; Isoform 3 of Thioredoxin reductase 1, cytoplasmic OS=Homo sapiens GN=TXNRD1; Isoform 2 of Thio…	2	99	VMVLDFVTPTPLGTRW			cleaved W-G@C-term; missed R-W@15	-0.00271844	1830.97	916.491	1830.97	916.492	2	9	1.1.1.2533.12	46.704	5590.06	3785.52	46.64	0.15	1198.42
1	sp|Q16881|TRXR1_DROME; sp|Q16881-6|TRXR1_DROME; sp|Q16881-5|TRXR1_DROME; sp|Q16881-4|TRXR1_DROME; sp|Q16881-3|TRXR1_DROME; sp|Q16881-2|TRXR1_DROME	Thioredoxin reductase 1, cytoplasmic OS=Homo sapiens GN=TXNRD1 PE=1 SV=3; Isoform 6 of Thioredoxin reductase 1, cytoplasmic OS=Homo sapiens GN=TXNRD1; Isoform 5 of Thioredoxin reductase 1, cytoplasmic OS=Homo sapiens GN=TXNRD1; Isoform 4 of Thioredoxin reductase 1, cytoplasmic OS=Homo sapiens GN=TXNRD1; Isoform 3 of Thioredoxin reductase 1, cytoplasmic OS=Homo sapiens GN=TXNRD1; Isoform 2 of Thio…	2	99	VVAQSTNSEEIIEGEYNTVML			cleaved L-A@C-term	6.89308e-07	2325.1	776.042	2325.1	776.042	3	15	1.1.1.2504.9	45.2609	124751	16911.8	44.7	0.15	2136.91
1	sp|Q16881|TRXR1_DROME; sp|Q16881-6|TRXR1_DROME; sp|Q16881-5|TRXR1_DROME; sp|Q16881-4|TRXR1_DROME; sp|Q16881-3|TRXR1_DROME; sp|Q16881-2|TRXR1_DROME	Thioredoxin reductase 1, cytoplasmic OS=Homo sapiens GN=TXNRD1 PE=1 SV=3; Isoform 6 of Thioredoxin reductase 1, cytoplasmic OS=Homo sapiens GN=TXNRD1; Isoform 5 of Thioredoxin reductase 1, cytoplasmic OS=Homo sapiens GN=TXNRD1; Isoform 4 of Thioredoxin reductase 1, cytoplasmic OS=Homo sapiens GN=TXNRD1; Isoform 3 of Thioredoxin reductase 1, cytoplasmic OS=Homo sapiens GN=TXNRD1; Isoform 2 of Thio…	2	99	VVAQSTNSEEIIEGEYNTVMLAIGR				-0.000869603	2722.35	908.456	2722.35	908.457	3	21	1.1.1.2533.11	46.7007	22833.4	18270.4	46.67	0.1	2452.48
1	sp|Q16881|TRXR1_DROME; sp|Q16881-6|TRXR1_DROME; sp|Q16881-5|TRXR1_DROME; sp|Q16881-4|TRXR1_DROME; sp|Q16881-3|TRXR1_DROME; sp|Q16881-2|TRXR1_DROME	Thioredoxin reductase 1, cytoplasmic OS=Homo sapiens GN=TXNRD1 PE=1 SV=3; Isoform 6 of Thioredoxin reductase 1, cytoplasmic OS=Homo sapiens GN=TXNRD1; Isoform 5 of Thioredoxin reductase 1, cytoplasmic OS=Homo sapiens GN=TXNRD1; Isoform 4 of Thioredoxin reductase 1, cytoplasmic OS=Homo sapiens GN=TXNRD1; Isoform 3 of Thioredoxin reductase 1, cytoplasmic OS=Homo sapiens GN=TXNRD1; Isoform 2 of Thio…	2	99	VVGFHVLGPNAGEVTQGF			cleaved F-A@C-term	0.00327725	1826.93	609.986	1826.93	609.984	3	13	1.1.1.2468.5	43.4743	83469.6	29012.2	43.37	0.1	1735.99
1	sp|Q16881|TRXR1_DROME; sp|Q16881-6|TRXR1_DROME; sp|Q16881-5|TRXR1_DROME; sp|Q16881-4|TRXR1_DROME; sp|Q16881-3|TRXR1_DROME; sp|Q16881-2|TRXR1_DROME	Thioredoxin reductase 1, cytoplasmic OS=Homo sapiens GN=TXNRD1 PE=1 SV=3; Isoform 6 of Thioredoxin reductase 1, cytoplasmic OS=Homo sapiens GN=TXNRD1; Isoform 5 of Thioredoxin reductase 1, cytoplasmic OS=Homo sapiens GN=TXNRD1; Isoform 4 of Thioredoxin reductase 1, cytoplasmic OS=Homo sapiens GN=TXNRD1; Isoform 3 of Thioredoxin reductase 1, cytoplasmic OS=Homo sapiens GN=TXNRD1; Isoform 2 of Thio…	2	99	VVGFHVLGPNAGEVTQGFAA			cleaved A-A@C-term	0.00255056	1969.01	657.343	1969.01	657.343	3	14	1.1.1.2465.11	43.3363	52927.7	44857.9	43.31	0.1	8208.97
1	sp|Q16881|TRXR1_DROME; sp|Q16881-6|TRXR1_DROME; sp|Q16881-5|TRXR1_DROME; sp|Q16881-4|TRXR1_DROME; sp|Q16881-3|TRXR1_DROME; sp|Q16881-2|TRXR1_DROME	Thioredoxin reductase 1, cytoplasmic OS=Homo sapiens GN=TXNRD1 PE=1 SV=3; Isoform 6 of Thioredoxin reductase 1, cytoplasmic OS=Homo sapiens GN=TXNRD1; Isoform 5 of Thioredoxin reductase 1, cytoplasmic OS=Homo sapiens GN=TXNRD1; Isoform 4 of Thioredoxin reductase 1, cytoplasmic OS=Homo sapiens GN=TXNRD1; Isoform 3 of Thioredoxin reductase 1, cytoplasmic OS=Homo sapiens GN=TXNRD1; Isoform 2 of Thio…	2	99	VVGFHVLGPNAGEVTQGFAAA			cleaved A-L@C-term	0.00511221	2040.05	681.023	2040.04	681.022	3	16	1.1.1.2466.12	43.3873	17773.5	16854.5	43.41	0.1	4552.14
1	sp|Q16881|TRXR1_DROME; sp|Q16881-6|TRXR1_DROME; sp|Q16881-5|TRXR1_DROME; sp|Q16881-4|TRXR1_DROME; sp|Q16881-3|TRXR1_DROME; sp|Q16881-2|TRXR1_DROME	Thioredoxin reductase 1, cytoplasmic OS=Homo sapiens GN=TXNRD1 PE=1 SV=3; Isoform 6 of Thioredoxin reductase 1, cytoplasmic OS=Homo sapiens GN=TXNRD1; Isoform 5 of Thioredoxin reductase 1, cytoplasmic OS=Homo sapiens GN=TXNRD1; Isoform 4 of Thioredoxin reductase 1, cytoplasmic OS=Homo sapiens GN=TXNRD1; Isoform 3 of Thioredoxin reductase 1, cytoplasmic OS=Homo sapiens GN=TXNRD1; Isoform 2 of Thio…	2	99	VVGFHVLGPNAGEVTQGFAAAL			cleaved L-K@C-term	0.00221195	2153.13	718.717	2153.13	718.716	3	11	1.1.1.2504.5	45.2525	3976.86	3487.89	45.2	0.15	1090.4
1	sp|Q16881|TRXR1_DROME; sp|Q16881-6|TRXR1_DROME; sp|Q16881-5|TRXR1_DROME; sp|Q16881-4|TRXR1_DROME; sp|Q16881-3|TRXR1_DROME; sp|Q16881-2|TRXR1_DROME	Thioredoxin reductase 1, cytoplasmic OS=Homo sapiens GN=TXNRD1 PE=1 SV=3; Isoform 6 of Thioredoxin reductase 1, cytoplasmic OS=Homo sapiens GN=TXNRD1; Isoform 5 of Thioredoxin reductase 1, cytoplasmic OS=Homo sapiens GN=TXNRD1; Isoform 4 of Thioredoxin reductase 1, cytoplasmic OS=Homo sapiens GN=TXNRD1; Isoform 3 of Thioredoxin reductase 1, cytoplasmic OS=Homo sapiens GN=TXNRD1; Isoform 2 of Thio…	2	99	VVGFHVLGPNAGEVTQGFAAALK				-0.000269041	2281.22	761.414	2281.22	761.415	3	18	1.1.1.2487.12	44.4261	548354	6962.07	43.96	0.1	1953.44
1	sp|Q16881|TRXR1_DROME; sp|Q16881-6|TRXR1_DROME; sp|Q16881-5|TRXR1_DROME; sp|Q16881-4|TRXR1_DROME; sp|Q16881-3|TRXR1_DROME; sp|Q16881-2|TRXR1_DROME	Thioredoxin reductase 1, cytoplasmic OS=Homo sapiens GN=TXNRD1 PE=1 SV=3; Isoform 6 of Thioredoxin reductase 1, cytoplasmic OS=Homo sapiens GN=TXNRD1; Isoform 5 of Thioredoxin reductase 1, cytoplasmic OS=Homo sapiens GN=TXNRD1; Isoform 4 of Thioredoxin reductase 1, cytoplasmic OS=Homo sapiens GN=TXNRD1; Isoform 3 of Thioredoxin reductase 1, cytoplasmic OS=Homo sapiens GN=TXNRD1; Isoform 2 of Thio…	2	99	VVYENAYGQFIGPHR	Deamidated(N)@5			-0.000182768	1749.85	584.29	1749.85	584.29	3	19	1.1.1.2317.4	36.0843	19806.5	14586.3	36.02	0.15	4522.44
1	sp|Q16881|TRXR1_DROME; sp|Q16881-6|TRXR1_DROME; sp|Q16881-5|TRXR1_DROME; sp|Q16881-4|TRXR1_DROME; sp|Q16881-3|TRXR1_DROME; sp|Q16881-2|TRXR1_DROME	Thioredoxin reductase 1, cytoplasmic OS=Homo sapiens GN=TXNRD1 PE=1 SV=3; Isoform 6 of Thioredoxin reductase 1, cytoplasmic OS=Homo sapiens GN=TXNRD1; Isoform 5 of Thioredoxin reductase 1, cytoplasmic OS=Homo sapiens GN=TXNRD1; Isoform 4 of Thioredoxin reductase 1, cytoplasmic OS=Homo sapiens GN=TXNRD1; Isoform 3 of Thioredoxin reductase 1, cytoplasmic OS=Homo sapiens GN=TXNRD1; Isoform 2 of Thio…	2	99	WGLGGTCVN	Carbamidomethyl(C)@7		cleaved N-V@C-term	-0.00175194	962.426	482.22	962.428	482.221	2	14	1.1.1.2297.4	35.0945	9266.58	8678.81	35.04	0.15	2422.74
1	sp|Q16881|TRXR1_DROME; sp|Q16881-6|TRXR1_DROME; sp|Q16881-5|TRXR1_DROME; sp|Q16881-4|TRXR1_DROME; sp|Q16881-3|TRXR1_DROME; sp|Q16881-2|TRXR1_DROME	Thioredoxin reductase 1, cytoplasmic OS=Homo sapiens GN=TXNRD1 PE=1 SV=3; Isoform 6 of Thioredoxin reductase 1, cytoplasmic OS=Homo sapiens GN=TXNRD1; Isoform 5 of Thioredoxin reductase 1, cytoplasmic OS=Homo sapiens GN=TXNRD1; Isoform 4 of Thioredoxin reductase 1, cytoplasmic OS=Homo sapiens GN=TXNRD1; Isoform 3 of Thioredoxin reductase 1, cytoplasmic OS=Homo sapiens GN=TXNRD1; Isoform 2 of Thio…	2	99	WGLGGTCVNVGCIPK	Carbamidomethyl(C)@7; Carbamidomethyl(C)@12			-0.00299661	1616.78	809.396	1616.78	809.397	2	24	1.1.1.2435.19	41.8692	1898011	176312	41.64	0.15	15223.6
1	sp|Q16881|TRXR1_DROME; sp|Q16881-6|TRXR1_DROME; sp|Q16881-5|TRXR1_DROME; sp|Q16881-4|TRXR1_DROME; sp|Q16881-3|TRXR1_DROME; sp|Q16881-2|TRXR1_DROME	Thioredoxin reductase 1, cytoplasmic OS=Homo sapiens GN=TXNRD1 PE=1 SV=3; Isoform 6 of Thioredoxin reductase 1, cytoplasmic OS=Homo sapiens GN=TXNRD1; Isoform 5 of Thioredoxin reductase 1, cytoplasmic OS=Homo sapiens GN=TXNRD1; Isoform 4 of Thioredoxin reductase 1, cytoplasmic OS=Homo sapiens GN=TXNRD1; Isoform 3 of Thioredoxin reductase 1, cytoplasmic OS=Homo sapiens GN=TXNRD1; Isoform 2 of Thio…	2	99	WGLGGTCVNVGCIPKK	Carbamidomethyl(C)@7; Carbamidomethyl(C)@12; Lys-loss@C-term		missed K-K@15	-0.00299661	1616.78	809.396	1616.78	809.397	2	22	1.1.1.2436.12	41.9067	1898011	89602	41.64	0.15	8426.09
1	sp|Q16881|TRXR1_DROME; sp|Q16881-6|TRXR1_DROME; sp|Q16881-5|TRXR1_DROME; sp|Q16881-4|TRXR1_DROME; sp|Q16881-3|TRXR1_DROME; sp|Q16881-2|TRXR1_DROME	Thioredoxin reductase 1, cytoplasmic OS=Homo sapiens GN=TXNRD1 PE=1 SV=3; Isoform 6 of Thioredoxin reductase 1, cytoplasmic OS=Homo sapiens GN=TXNRD1; Isoform 5 of Thioredoxin reductase 1, cytoplasmic OS=Homo sapiens GN=TXNRD1; Isoform 4 of Thioredoxin reductase 1, cytoplasmic OS=Homo sapiens GN=TXNRD1; Isoform 3 of Thioredoxin reductase 1, cytoplasmic OS=Homo sapiens GN=TXNRD1; Isoform 2 of Thio…	2	99	YLGIPGDK				0.000451426	861.46	431.737	861.46	431.737	2	10	1.1.1.2118.6	26.2793	27396.8	16226.5	26.47	0.64	5066.24
1	sp|Q16881|TRXR1_DROME; sp|Q16881-6|TRXR1_DROME; sp|Q16881-5|TRXR1_DROME; sp|Q16881-4|TRXR1_DROME; sp|Q16881-3|TRXR1_DROME; sp|Q16881-2|TRXR1_DROME	Thioredoxin reductase 1, cytoplasmic OS=Homo sapiens GN=TXNRD1 PE=1 SV=3; Isoform 6 of Thioredoxin reductase 1, cytoplasmic OS=Homo sapiens GN=TXNRD1; Isoform 5 of Thioredoxin reductase 1, cytoplasmic OS=Homo sapiens GN=TXNRD1; Isoform 4 of Thioredoxin reductase 1, cytoplasmic OS=Homo sapiens GN=TXNRD1; Isoform 3 of Thioredoxin reductase 1, cytoplasmic OS=Homo sapiens GN=TXNRD1; Isoform 2 of Thio…	2	99	YVALECAGF	Carbamidomethyl(C)@6		cleaved S-Y@N-term; cleaved F-L@C-term	-0.00131418	1028.46	515.239	1028.46	515.239	2	13	1.1.1.2432.5	41.6987	5685.24	5450.43	41.69	0.1	1783.72
1	sp|Q16881|TRXR1_DROME; sp|Q16881-6|TRXR1_DROME; sp|Q16881-5|TRXR1_DROME; sp|Q16881-4|TRXR1_DROME; sp|Q16881-3|TRXR1_DROME; sp|Q16881-2|TRXR1_DROME	Thioredoxin reductase 1, cytoplasmic OS=Homo sapiens GN=TXNRD1 PE=1 SV=3; Isoform 6 of Thioredoxin reductase 1, cytoplasmic OS=Homo sapiens GN=TXNRD1; Isoform 5 of Thioredoxin reductase 1, cytoplasmic OS=Homo sapiens GN=TXNRD1; Isoform 4 of Thioredoxin reductase 1, cytoplasmic OS=Homo sapiens GN=TXNRD1; Isoform 3 of Thioredoxin reductase 1, cytoplasmic OS=Homo sapiens GN=TXNRD1; Isoform 2 of Thio…	1.85387	99	IPVTDEEQTNVPY			cleaved Y-I@C-term	1.57712e-05	1503.71	752.862	1503.71	752.862	2	14	1.1.1.2285.24	34.5366	366472	73645.9	34.69	0.2	5225.06
1	sp|Q16881|TRXR1_DROME; sp|Q16881-6|TRXR1_DROME; sp|Q16881-5|TRXR1_DROME; sp|Q16881-4|TRXR1_DROME; sp|Q16881-3|TRXR1_DROME; sp|Q16881-2|TRXR1_DROME	Thioredoxin reductase 1, cytoplasmic OS=Homo sapiens GN=TXNRD1 PE=1 SV=3; Isoform 6 of Thioredoxin reductase 1, cytoplasmic OS=Homo sapiens GN=TXNRD1; Isoform 5 of Thioredoxin reductase 1, cytoplasmic OS=Homo sapiens GN=TXNRD1; Isoform 4 of Thioredoxin reductase 1, cytoplasmic OS=Homo sapiens GN=TXNRD1; Isoform 3 of Thioredoxin reductase 1, cytoplasmic OS=Homo sapiens GN=TXNRD1; Isoform 2 of Thio…	1.85387	99	IYAIGDILEDK			cleaved Y-I@N-term	0.000775452	1248.66	625.338	1248.66	625.337	2	16	1.1.1.2455.5	42.8325	22363.8	20824	42.82	0.1	8923.13
1	sp|Q16881|TRXR1_DROME; sp|Q16881-6|TRXR1_DROME; sp|Q16881-5|TRXR1_DROME; sp|Q16881-4|TRXR1_DROME; sp|Q16881-3|TRXR1_DROME; sp|Q16881-2|TRXR1_DROME	Thioredoxin reductase 1, cytoplasmic OS=Homo sapiens GN=TXNRD1 PE=1 SV=3; Isoform 6 of Thioredoxin reductase 1, cytoplasmic OS=Homo sapiens GN=TXNRD1; Isoform 5 of Thioredoxin reductase 1, cytoplasmic OS=Homo sapiens GN=TXNRD1; Isoform 4 of Thioredoxin reductase 1, cytoplasmic OS=Homo sapiens GN=TXNRD1; Isoform 3 of Thioredoxin reductase 1, cytoplasmic OS=Homo sapiens GN=TXNRD1; Isoform 2 of Thio…	1.82391	99	FGEENIEVYHSY			cleaved Y-F@C-term	-0.00124231	1485.64	743.827	1485.64	743.828	2	20	1.1.1.2319.15	36.1962	224125	149353	36.12	0.15	39709.8
1	sp|Q16881|TRXR1_DROME; sp|Q16881-6|TRXR1_DROME; sp|Q16881-5|TRXR1_DROME; sp|Q16881-4|TRXR1_DROME; sp|Q16881-3|TRXR1_DROME; sp|Q16881-2|TRXR1_DROME	Thioredoxin reductase 1, cytoplasmic OS=Homo sapiens GN=TXNRD1 PE=1 SV=3; Isoform 6 of Thioredoxin reductase 1, cytoplasmic OS=Homo sapiens GN=TXNRD1; Isoform 5 of Thioredoxin reductase 1, cytoplasmic OS=Homo sapiens GN=TXNRD1; Isoform 4 of Thioredoxin reductase 1, cytoplasmic OS=Homo sapiens GN=TXNRD1; Isoform 3 of Thioredoxin reductase 1, cytoplasmic OS=Homo sapiens GN=TXNRD1; Isoform 2 of Thio…	1.79588	99	TGKIPVTDEEQTNVPY			cleaved Y-I@C-term; missed K-I@3	-0.00229876	1789.87	895.943	1789.87	895.944	2	17	1.1.1.2225.26	31.5802	144531	78861.6	31.68	0.2	9509.58
1	sp|Q16881|TRXR1_DROME; sp|Q16881-6|TRXR1_DROME; sp|Q16881-5|TRXR1_DROME; sp|Q16881-4|TRXR1_DROME; sp|Q16881-3|TRXR1_DROME; sp|Q16881-2|TRXR1_DROME	Thioredoxin reductase 1, cytoplasmic OS=Homo sapiens GN=TXNRD1 PE=1 SV=3; Isoform 6 of Thioredoxin reductase 1, cytoplasmic OS=Homo sapiens GN=TXNRD1; Isoform 5 of Thioredoxin reductase 1, cytoplasmic OS=Homo sapiens GN=TXNRD1; Isoform 4 of Thioredoxin reductase 1, cytoplasmic OS=Homo sapiens GN=TXNRD1; Isoform 3 of Thioredoxin reductase 1, cytoplasmic OS=Homo sapiens GN=TXNRD1; Isoform 2 of Thio…	1.63827	99	TPLEYGACGLSEEK	Carbamidomethyl(C)@8		cleaved F-T@N-term	-0.000486603	1552.71	777.361	1552.71	777.361	2	21	1.1.1.2189.20	29.8016	23091.6	22903.8	29.81	0.2	4644.19
1	sp|Q16881|TRXR1_DROME; sp|Q16881-6|TRXR1_DROME; sp|Q16881-5|TRXR1_DROME; sp|Q16881-4|TRXR1_DROME; sp|Q16881-3|TRXR1_DROME; sp|Q16881-2|TRXR1_DROME	Thioredoxin reductase 1, cytoplasmic OS=Homo sapiens GN=TXNRD1 PE=1 SV=3; Isoform 6 of Thioredoxin reductase 1, cytoplasmic OS=Homo sapiens GN=TXNRD1; Isoform 5 of Thioredoxin reductase 1, cytoplasmic OS=Homo sapiens GN=TXNRD1; Isoform 4 of Thioredoxin reductase 1, cytoplasmic OS=Homo sapiens GN=TXNRD1; Isoform 3 of Thioredoxin reductase 1, cytoplasmic OS=Homo sapiens GN=TXNRD1; Isoform 2 of Thio…	1.61979	99	KQLDSTIGIHPVCAEVF	Carbamidomethyl(C)@13		cleaved F-T@C-term; missed K-Q@1	-0.000145058	1912.97	957.493	1912.97	957.493	2	19	1.1.1.2415.15	40.8981	29604	25754.3	40.85	0.2	3218.99
1	sp|Q16881|TRXR1_DROME; sp|Q16881-6|TRXR1_DROME; sp|Q16881-5|TRXR1_DROME; sp|Q16881-4|TRXR1_DROME; sp|Q16881-3|TRXR1_DROME; sp|Q16881-2|TRXR1_DROME	Thioredoxin reductase 1, cytoplasmic OS=Homo sapiens GN=TXNRD1 PE=1 SV=3; Isoform 6 of Thioredoxin reductase 1, cytoplasmic OS=Homo sapiens GN=TXNRD1; Isoform 5 of Thioredoxin reductase 1, cytoplasmic OS=Homo sapiens GN=TXNRD1; Isoform 4 of Thioredoxin reductase 1, cytoplasmic OS=Homo sapiens GN=TXNRD1; Isoform 3 of Thioredoxin reductase 1, cytoplasmic OS=Homo sapiens GN=TXNRD1; Isoform 2 of Thio…	1.60206	99	LIATGERPR			cleaved F-L@N-term	0.000709029	1011.58	506.799	1011.58	506.799	2	12	1.1.1.2083.13	24.5669	11423	11295.7	24.59	0.3	1151.79
1	sp|Q16881|TRXR1_DROME; sp|Q16881-6|TRXR1_DROME; sp|Q16881-5|TRXR1_DROME; sp|Q16881-4|TRXR1_DROME; sp|Q16881-3|TRXR1_DROME; sp|Q16881-2|TRXR1_DROME	Thioredoxin reductase 1, cytoplasmic OS=Homo sapiens GN=TXNRD1 PE=1 SV=3; Isoform 6 of Thioredoxin reductase 1, cytoplasmic OS=Homo sapiens GN=TXNRD1; Isoform 5 of Thioredoxin reductase 1, cytoplasmic OS=Homo sapiens GN=TXNRD1; Isoform 4 of Thioredoxin reductase 1, cytoplasmic OS=Homo sapiens GN=TXNRD1; Isoform 3 of Thioredoxin reductase 1, cytoplasmic OS=Homo sapiens GN=TXNRD1; Isoform 2 of Thio…	1.48149	99	TGKIPVTDEEQTNVPYIY			cleaved Y-A@C-term; missed K-I@3	0.00175526	2066.02	1034.02	2066.02	1034.02	2	12	1.1.1.2397.25	40.0118	136101	25251.6	39.87	0.1	1982.84
1	sp|Q16881|TRXR1_DROME; sp|Q16881-6|TRXR1_DROME; sp|Q16881-5|TRXR1_DROME; sp|Q16881-4|TRXR1_DROME; sp|Q16881-3|TRXR1_DROME; sp|Q16881-2|TRXR1_DROME	Thioredoxin reductase 1, cytoplasmic OS=Homo sapiens GN=TXNRD1 PE=1 SV=3; Isoform 6 of Thioredoxin reductase 1, cytoplasmic OS=Homo sapiens GN=TXNRD1; Isoform 5 of Thioredoxin reductase 1, cytoplasmic OS=Homo sapiens GN=TXNRD1; Isoform 4 of Thioredoxin reductase 1, cytoplasmic OS=Homo sapiens GN=TXNRD1; Isoform 3 of Thioredoxin reductase 1, cytoplasmic OS=Homo sapiens GN=TXNRD1; Isoform 2 of Thio…	1.46852	99	MHQAALLGQALQDSR			cleaved L-M@N-term	-0.00073605	1637.83	546.951	1637.83	546.951	3	15	1.1.1.2242.12	32.3955	4640.39	3914.75	32.33	0.35	1601.53
1	sp|Q16881|TRXR1_DROME; sp|Q16881-6|TRXR1_DROME; sp|Q16881-5|TRXR1_DROME; sp|Q16881-4|TRXR1_DROME; sp|Q16881-3|TRXR1_DROME; sp|Q16881-2|TRXR1_DROME	Thioredoxin reductase 1, cytoplasmic OS=Homo sapiens GN=TXNRD1 PE=1 SV=3; Isoform 6 of Thioredoxin reductase 1, cytoplasmic OS=Homo sapiens GN=TXNRD1; Isoform 5 of Thioredoxin reductase 1, cytoplasmic OS=Homo sapiens GN=TXNRD1; Isoform 4 of Thioredoxin reductase 1, cytoplasmic OS=Homo sapiens GN=TXNRD1; Isoform 3 of Thioredoxin reductase 1, cytoplasmic OS=Homo sapiens GN=TXNRD1; Isoform 2 of Thio…	1.3279	99	KVVYENAYGQF			cleaved F-I@C-term; missed K-V@1	0.000917701	1316.64	659.328	1316.64	659.327	2	18	1.1.1.2240.14	32.3002	77707.3	72724.1	32.28	0.2	12250.9
1	sp|Q16881|TRXR1_DROME; sp|Q16881-6|TRXR1_DROME; sp|Q16881-5|TRXR1_DROME; sp|Q16881-4|TRXR1_DROME; sp|Q16881-3|TRXR1_DROME; sp|Q16881-2|TRXR1_DROME	Thioredoxin reductase 1, cytoplasmic OS=Homo sapiens GN=TXNRD1 PE=1 SV=3; Isoform 6 of Thioredoxin reductase 1, cytoplasmic OS=Homo sapiens GN=TXNRD1; Isoform 5 of Thioredoxin reductase 1, cytoplasmic OS=Homo sapiens GN=TXNRD1; Isoform 4 of Thioredoxin reductase 1, cytoplasmic OS=Homo sapiens GN=TXNRD1; Isoform 3 of Thioredoxin reductase 1, cytoplasmic OS=Homo sapiens GN=TXNRD1; Isoform 2 of Thio…	1.20066	99	ALLGQALQDSR			cleaved A-A@N-term	0.000499621	1170.64	586.325	1170.64	586.325	2	19	1.1.1.2191.14	29.8908	101871	93312.5	29.92	0.15	22177.8
1	sp|Q16881|TRXR1_DROME; sp|Q16881-6|TRXR1_DROME; sp|Q16881-5|TRXR1_DROME; sp|Q16881-4|TRXR1_DROME; sp|Q16881-3|TRXR1_DROME; sp|Q16881-2|TRXR1_DROME	Thioredoxin reductase 1, cytoplasmic OS=Homo sapiens GN=TXNRD1 PE=1 SV=3; Isoform 6 of Thioredoxin reductase 1, cytoplasmic OS=Homo sapiens GN=TXNRD1; Isoform 5 of Thioredoxin reductase 1, cytoplasmic OS=Homo sapiens GN=TXNRD1; Isoform 4 of Thioredoxin reductase 1, cytoplasmic OS=Homo sapiens GN=TXNRD1; Isoform 3 of Thioredoxin reductase 1, cytoplasmic OS=Homo sapiens GN=TXNRD1; Isoform 2 of Thio…	1.16749	99	VVGFHVLGPN			cleaved N-A@C-term	-0.00135793	1037.56	519.789	1037.57	519.79	2	13	1.1.1.2301.3	35.2894	5665.17	5577.09	35.28	0.15	2182.07
1	sp|Q16881|TRXR1_DROME; sp|Q16881-6|TRXR1_DROME; sp|Q16881-5|TRXR1_DROME; sp|Q16881-4|TRXR1_DROME; sp|Q16881-3|TRXR1_DROME; sp|Q16881-2|TRXR1_DROME	Thioredoxin reductase 1, cytoplasmic OS=Homo sapiens GN=TXNRD1 PE=1 SV=3; Isoform 6 of Thioredoxin reductase 1, cytoplasmic OS=Homo sapiens GN=TXNRD1; Isoform 5 of Thioredoxin reductase 1, cytoplasmic OS=Homo sapiens GN=TXNRD1; Isoform 4 of Thioredoxin reductase 1, cytoplasmic OS=Homo sapiens GN=TXNRD1; Isoform 3 of Thioredoxin reductase 1, cytoplasmic OS=Homo sapiens GN=TXNRD1; Isoform 2 of Thio…	1.11919	99	CDYENVPTTVF	Carbamidomethyl(C)@1		cleaved F-T@C-term	0.00233615	1343.57	672.794	1343.57	672.792	2	10	1.1.1.2443.6	42.2417	9606.02	7361.64	42.19	0.1	1334.07
1	sp|Q16881|TRXR1_DROME; sp|Q16881-6|TRXR1_DROME; sp|Q16881-5|TRXR1_DROME; sp|Q16881-4|TRXR1_DROME; sp|Q16881-3|TRXR1_DROME; sp|Q16881-2|TRXR1_DROME	Thioredoxin reductase 1, cytoplasmic OS=Homo sapiens GN=TXNRD1 PE=1 SV=3; Isoform 6 of Thioredoxin reductase 1, cytoplasmic OS=Homo sapiens GN=TXNRD1; Isoform 5 of Thioredoxin reductase 1, cytoplasmic OS=Homo sapiens GN=TXNRD1; Isoform 4 of Thioredoxin reductase 1, cytoplasmic OS=Homo sapiens GN=TXNRD1; Isoform 3 of Thioredoxin reductase 1, cytoplasmic OS=Homo sapiens GN=TXNRD1; Isoform 2 of Thio…	1.11351	99	SGASILQAGC	Carbamidomethyl(C)@10		cleaved C-U@C-term	-0.00144878	962.448	482.231	962.449	482.232	2	17	1.1.1.2142.6	27.4593	189298	88512.5	27.35	0.2	17927.7
1	sp|Q16881|TRXR1_DROME; sp|Q16881-6|TRXR1_DROME; sp|Q16881-5|TRXR1_DROME; sp|Q16881-4|TRXR1_DROME; sp|Q16881-3|TRXR1_DROME; sp|Q16881-2|TRXR1_DROME	Thioredoxin reductase 1, cytoplasmic OS=Homo sapiens GN=TXNRD1 PE=1 SV=3; Isoform 6 of Thioredoxin reductase 1, cytoplasmic OS=Homo sapiens GN=TXNRD1; Isoform 5 of Thioredoxin reductase 1, cytoplasmic OS=Homo sapiens GN=TXNRD1; Isoform 4 of Thioredoxin reductase 1, cytoplasmic OS=Homo sapiens GN=TXNRD1; Isoform 3 of Thioredoxin reductase 1, cytoplasmic OS=Homo sapiens GN=TXNRD1; Isoform 2 of Thio…	1.03621	99	AALLGQALQDSR			cleaved Q-A@N-term	-0.00184531	1241.67	621.843	1241.67	621.844	2	21	1.1.1.2232.22	31.919	41803.3	40839.4	31.93	0.2	10685.3
1	sp|Q16881|TRXR1_DROME; sp|Q16881-6|TRXR1_DROME; sp|Q16881-5|TRXR1_DROME; sp|Q16881-4|TRXR1_DROME; sp|Q16881-3|TRXR1_DROME; sp|Q16881-2|TRXR1_DROME	Thioredoxin reductase 1, cytoplasmic OS=Homo sapiens GN=TXNRD1 PE=1 SV=3; Isoform 6 of Thioredoxin reductase 1, cytoplasmic OS=Homo sapiens GN=TXNRD1; Isoform 5 of Thioredoxin reductase 1, cytoplasmic OS=Homo sapiens GN=TXNRD1; Isoform 4 of Thioredoxin reductase 1, cytoplasmic OS=Homo sapiens GN=TXNRD1; Isoform 3 of Thioredoxin reductase 1, cytoplasmic OS=Homo sapiens GN=TXNRD1; Isoform 2 of Thio…	1.01773	99	LMHQAALLGQ			cleaved Q-A@C-term	-0.00153831	1080.57	541.294	1080.57	541.295	2	11	1.1.1.2157.13	28.2097	25443.9	17024.9	28.29	0.15	3236.35
1	sp|Q16881|TRXR1_DROME; sp|Q16881-6|TRXR1_DROME; sp|Q16881-5|TRXR1_DROME; sp|Q16881-4|TRXR1_DROME; sp|Q16881-3|TRXR1_DROME; sp|Q16881-2|TRXR1_DROME	Thioredoxin reductase 1, cytoplasmic OS=Homo sapiens GN=TXNRD1 PE=1 SV=3; Isoform 6 of Thioredoxin reductase 1, cytoplasmic OS=Homo sapiens GN=TXNRD1; Isoform 5 of Thioredoxin reductase 1, cytoplasmic OS=Homo sapiens GN=TXNRD1; Isoform 4 of Thioredoxin reductase 1, cytoplasmic OS=Homo sapiens GN=TXNRD1; Isoform 3 of Thioredoxin reductase 1, cytoplasmic OS=Homo sapiens GN=TXNRD1; Isoform 2 of Thio…	0.943095	99	HQAALLGQALQDSR			cleaved M-H@N-term	-0.000942749	1506.79	503.27	1506.79	503.271	3	15	1.1.1.2161.14	28.4099	2112.94	1908.05	28.34	0.15	736.441
1	sp|Q16881|TRXR1_DROME; sp|Q16881-6|TRXR1_DROME; sp|Q16881-5|TRXR1_DROME; sp|Q16881-4|TRXR1_DROME; sp|Q16881-3|TRXR1_DROME; sp|Q16881-2|TRXR1_DROME	Thioredoxin reductase 1, cytoplasmic OS=Homo sapiens GN=TXNRD1 PE=1 SV=3; Isoform 6 of Thioredoxin reductase 1, cytoplasmic OS=Homo sapiens GN=TXNRD1; Isoform 5 of Thioredoxin reductase 1, cytoplasmic OS=Homo sapiens GN=TXNRD1; Isoform 4 of Thioredoxin reductase 1, cytoplasmic OS=Homo sapiens GN=TXNRD1; Isoform 3 of Thioredoxin reductase 1, cytoplasmic OS=Homo sapiens GN=TXNRD1; Isoform 2 of Thio…	0.869666	99	FGEENIEVYH			cleaved H-S@C-term	-0.0074798	1235.54	618.777	1235.55	618.78	2	11	1.1.1.2238.10	32.2049	2076.27	1994.99	32.47	0.49	1051.64
1	sp|Q16881|TRXR1_DROME; sp|Q16881-6|TRXR1_DROME; sp|Q16881-5|TRXR1_DROME; sp|Q16881-4|TRXR1_DROME; sp|Q16881-3|TRXR1_DROME; sp|Q16881-2|TRXR1_DROME	Thioredoxin reductase 1, cytoplasmic OS=Homo sapiens GN=TXNRD1 PE=1 SV=3; Isoform 6 of Thioredoxin reductase 1, cytoplasmic OS=Homo sapiens GN=TXNRD1; Isoform 5 of Thioredoxin reductase 1, cytoplasmic OS=Homo sapiens GN=TXNRD1; Isoform 4 of Thioredoxin reductase 1, cytoplasmic OS=Homo sapiens GN=TXNRD1; Isoform 3 of Thioredoxin reductase 1, cytoplasmic OS=Homo sapiens GN=TXNRD1; Isoform 2 of Thio…	0.703335	99	ENAYGQFIGPHR			cleaved Y-E@N-term	0.00303842	1387.67	463.563	1387.66	463.562	3	14	1.1.1.2114.7	26.0846	6702.14	6033.35	26.12	0.34	2632.56
1	sp|Q16881|TRXR1_DROME; sp|Q16881-6|TRXR1_DROME; sp|Q16881-5|TRXR1_DROME; sp|Q16881-4|TRXR1_DROME; sp|Q16881-3|TRXR1_DROME; sp|Q16881-2|TRXR1_DROME	Thioredoxin reductase 1, cytoplasmic OS=Homo sapiens GN=TXNRD1 PE=1 SV=3; Isoform 6 of Thioredoxin reductase 1, cytoplasmic OS=Homo sapiens GN=TXNRD1; Isoform 5 of Thioredoxin reductase 1, cytoplasmic OS=Homo sapiens GN=TXNRD1; Isoform 4 of Thioredoxin reductase 1, cytoplasmic OS=Homo sapiens GN=TXNRD1; Isoform 3 of Thioredoxin reductase 1, cytoplasmic OS=Homo sapiens GN=TXNRD1; Isoform 2 of Thio…	0.66354	99	LLGQALQDSR			cleaved A-L@N-term	0.00113099	1099.6	550.807	1099.6	550.807	2	15	1.1.1.2101.16	25.4588	46664.8	44809.2	25.48	0.15	10914.8
1	sp|Q16881|TRXR1_DROME; sp|Q16881-6|TRXR1_DROME; sp|Q16881-5|TRXR1_DROME; sp|Q16881-4|TRXR1_DROME; sp|Q16881-3|TRXR1_DROME; sp|Q16881-2|TRXR1_DROME	Thioredoxin reductase 1, cytoplasmic OS=Homo sapiens GN=TXNRD1 PE=1 SV=3; Isoform 6 of Thioredoxin reductase 1, cytoplasmic OS=Homo sapiens GN=TXNRD1; Isoform 5 of Thioredoxin reductase 1, cytoplasmic OS=Homo sapiens GN=TXNRD1; Isoform 4 of Thioredoxin reductase 1, cytoplasmic OS=Homo sapiens GN=TXNRD1; Isoform 3 of Thioredoxin reductase 1, cytoplasmic OS=Homo sapiens GN=TXNRD1; Isoform 2 of Thio…	0.632644	99	MIEAVQNHIGSLN			cleaved N-W@C-term	-0.00106274	1424.71	713.361	1424.71	713.361	2	14	1.1.1.2250.21	32.8055	4242.13	4195.34	32.82	0.15	1263.48
1	sp|Q16881|TRXR1_DROME; sp|Q16881-6|TRXR1_DROME; sp|Q16881-5|TRXR1_DROME; sp|Q16881-4|TRXR1_DROME; sp|Q16881-3|TRXR1_DROME; sp|Q16881-2|TRXR1_DROME	Thioredoxin reductase 1, cytoplasmic OS=Homo sapiens GN=TXNRD1 PE=1 SV=3; Isoform 6 of Thioredoxin reductase 1, cytoplasmic OS=Homo sapiens GN=TXNRD1; Isoform 5 of Thioredoxin reductase 1, cytoplasmic OS=Homo sapiens GN=TXNRD1; Isoform 4 of Thioredoxin reductase 1, cytoplasmic OS=Homo sapiens GN=TXNRD1; Isoform 3 of Thioredoxin reductase 1, cytoplasmic OS=Homo sapiens GN=TXNRD1; Isoform 2 of Thio…	0.585027	99	VVYENAYGQF			cleaved F-I@C-term	0.00202327	1188.55	595.281	1188.55	595.28	2	15	1.1.1.2339.9	37.1264	56974.5	56074.2	37.16	0.25	10569.9
1	sp|Q16881|TRXR1_DROME; sp|Q16881-6|TRXR1_DROME; sp|Q16881-5|TRXR1_DROME; sp|Q16881-4|TRXR1_DROME; sp|Q16881-3|TRXR1_DROME; sp|Q16881-2|TRXR1_DROME	Thioredoxin reductase 1, cytoplasmic OS=Homo sapiens GN=TXNRD1 PE=1 SV=3; Isoform 6 of Thioredoxin reductase 1, cytoplasmic OS=Homo sapiens GN=TXNRD1; Isoform 5 of Thioredoxin reductase 1, cytoplasmic OS=Homo sapiens GN=TXNRD1; Isoform 4 of Thioredoxin reductase 1, cytoplasmic OS=Homo sapiens GN=TXNRD1; Isoform 3 of Thioredoxin reductase 1, cytoplasmic OS=Homo sapiens GN=TXNRD1; Isoform 2 of Thio…	0.575118	99	FGEENIEVYHS			cleaved S-Y@C-term	0.00147621	1322.58	662.297	1322.58	662.296	2	14	1.1.1.2241.15	32.3512	16466	8891.48	32.23	0.2	1645.34
1	sp|Q16881|TRXR1_DROME; sp|Q16881-6|TRXR1_DROME; sp|Q16881-5|TRXR1_DROME; sp|Q16881-4|TRXR1_DROME; sp|Q16881-3|TRXR1_DROME; sp|Q16881-2|TRXR1_DROME	Thioredoxin reductase 1, cytoplasmic OS=Homo sapiens GN=TXNRD1 PE=1 SV=3; Isoform 6 of Thioredoxin reductase 1, cytoplasmic OS=Homo sapiens GN=TXNRD1; Isoform 5 of Thioredoxin reductase 1, cytoplasmic OS=Homo sapiens GN=TXNRD1; Isoform 4 of Thioredoxin reductase 1, cytoplasmic OS=Homo sapiens GN=TXNRD1; Isoform 3 of Thioredoxin reductase 1, cytoplasmic OS=Homo sapiens GN=TXNRD1; Isoform 2 of Thio…	0.519993	99	MIEAVQNHIG			cleaved G-S@C-term	-0.000991898	1110.55	556.281	1110.55	556.282	2	12	1.1.1.2107.20	25.7618	9752.84	9525.44	25.77	0.1	4101.91
1	sp|Q16881|TRXR1_DROME; sp|Q16881-6|TRXR1_DROME; sp|Q16881-5|TRXR1_DROME; sp|Q16881-4|TRXR1_DROME; sp|Q16881-3|TRXR1_DROME; sp|Q16881-2|TRXR1_DROME	Thioredoxin reductase 1, cytoplasmic OS=Homo sapiens GN=TXNRD1 PE=1 SV=3; Isoform 6 of Thioredoxin reductase 1, cytoplasmic OS=Homo sapiens GN=TXNRD1; Isoform 5 of Thioredoxin reductase 1, cytoplasmic OS=Homo sapiens GN=TXNRD1; Isoform 4 of Thioredoxin reductase 1, cytoplasmic OS=Homo sapiens GN=TXNRD1; Isoform 3 of Thioredoxin reductase 1, cytoplasmic OS=Homo sapiens GN=TXNRD1; Isoform 2 of Thio…	0.488117	99	GACGLSEEK	Carbamidomethyl(C)@3		cleaved Y-G@N-term	0.00257439	949.42	475.717	949.417	475.716	2	14	1.1.1.1831.11	12.4201	7462.01	7327.52	12.4	0.2	1817.02
1	sp|Q16881|TRXR1_DROME; sp|Q16881-6|TRXR1_DROME; sp|Q16881-5|TRXR1_DROME; sp|Q16881-4|TRXR1_DROME; sp|Q16881-3|TRXR1_DROME; sp|Q16881-2|TRXR1_DROME	Thioredoxin reductase 1, cytoplasmic OS=Homo sapiens GN=TXNRD1 PE=1 SV=3; Isoform 6 of Thioredoxin reductase 1, cytoplasmic OS=Homo sapiens GN=TXNRD1; Isoform 5 of Thioredoxin reductase 1, cytoplasmic OS=Homo sapiens GN=TXNRD1; Isoform 4 of Thioredoxin reductase 1, cytoplasmic OS=Homo sapiens GN=TXNRD1; Isoform 3 of Thioredoxin reductase 1, cytoplasmic OS=Homo sapiens GN=TXNRD1; Isoform 2 of Thio…	0.476254	99	VVYENAYGQ			cleaved Q-F@C-term	0.000550824	1041.48	521.746	1041.48	521.746	2	14	1.1.1.2070.8	23.9206	6891.38	5707.06	23.86	0.15	1273.01
1	sp|Q16881|TRXR1_DROME; sp|Q16881-6|TRXR1_DROME; sp|Q16881-5|TRXR1_DROME; sp|Q16881-4|TRXR1_DROME; sp|Q16881-3|TRXR1_DROME; sp|Q16881-2|TRXR1_DROME	Thioredoxin reductase 1, cytoplasmic OS=Homo sapiens GN=TXNRD1 PE=1 SV=3; Isoform 6 of Thioredoxin reductase 1, cytoplasmic OS=Homo sapiens GN=TXNRD1; Isoform 5 of Thioredoxin reductase 1, cytoplasmic OS=Homo sapiens GN=TXNRD1; Isoform 4 of Thioredoxin reductase 1, cytoplasmic OS=Homo sapiens GN=TXNRD1; Isoform 3 of Thioredoxin reductase 1, cytoplasmic OS=Homo sapiens GN=TXNRD1; Isoform 2 of Thio…	0.458421	99	KLMHQAALL			cleaved L-G@C-term; missed K-L@1	0.000882463	1023.59	512.803	1023.59	512.802	2	14	1.1.1.2089.15	24.8657	67465.7	47291.6	24.93	0.1	6994.61
1	sp|Q16881|TRXR1_DROME; sp|Q16881-6|TRXR1_DROME; sp|Q16881-5|TRXR1_DROME; sp|Q16881-4|TRXR1_DROME; sp|Q16881-3|TRXR1_DROME; sp|Q16881-2|TRXR1_DROME	Thioredoxin reductase 1, cytoplasmic OS=Homo sapiens GN=TXNRD1 PE=1 SV=3; Isoform 6 of Thioredoxin reductase 1, cytoplasmic OS=Homo sapiens GN=TXNRD1; Isoform 5 of Thioredoxin reductase 1, cytoplasmic OS=Homo sapiens GN=TXNRD1; Isoform 4 of Thioredoxin reductase 1, cytoplasmic OS=Homo sapiens GN=TXNRD1; Isoform 3 of Thioredoxin reductase 1, cytoplasmic OS=Homo sapiens GN=TXNRD1; Isoform 2 of Thio…	0.434152	99	GPNAGEVTQGF			cleaved L-G@N-term; cleaved F-A@C-term	-0.000420162	1075.49	538.754	1075.49	538.754	2	11	1.1.1.2202.12	30.4283	2036.24	1987.17	30.46	0.25	704.944
1	sp|Q16881|TRXR1_DROME; sp|Q16881-6|TRXR1_DROME; sp|Q16881-5|TRXR1_DROME; sp|Q16881-4|TRXR1_DROME; sp|Q16881-3|TRXR1_DROME; sp|Q16881-2|TRXR1_DROME	Thioredoxin reductase 1, cytoplasmic OS=Homo sapiens GN=TXNRD1 PE=1 SV=3; Isoform 6 of Thioredoxin reductase 1, cytoplasmic OS=Homo sapiens GN=TXNRD1; Isoform 5 of Thioredoxin reductase 1, cytoplasmic OS=Homo sapiens GN=TXNRD1; Isoform 4 of Thioredoxin reductase 1, cytoplasmic OS=Homo sapiens GN=TXNRD1; Isoform 3 of Thioredoxin reductase 1, cytoplasmic OS=Homo sapiens GN=TXNRD1; Isoform 2 of Thio…	0.343902	99	QLDSTIGIHPVCAE	Carbamidomethyl(C)@12		cleaved E-V@C-term	-0.00151717	1538.74	770.376	1538.74	770.377	2	15	1.1.1.2279.17	34.2381	7941.92	7211.43	34.2	0.15	2459.17
1	sp|Q16881|TRXR1_DROME; sp|Q16881-6|TRXR1_DROME; sp|Q16881-5|TRXR1_DROME; sp|Q16881-4|TRXR1_DROME; sp|Q16881-3|TRXR1_DROME; sp|Q16881-2|TRXR1_DROME	Thioredoxin reductase 1, cytoplasmic OS=Homo sapiens GN=TXNRD1 PE=1 SV=3; Isoform 6 of Thioredoxin reductase 1, cytoplasmic OS=Homo sapiens GN=TXNRD1; Isoform 5 of Thioredoxin reductase 1, cytoplasmic OS=Homo sapiens GN=TXNRD1; Isoform 4 of Thioredoxin reductase 1, cytoplasmic OS=Homo sapiens GN=TXNRD1; Isoform 3 of Thioredoxin reductase 1, cytoplasmic OS=Homo sapiens GN=TXNRD1; Isoform 2 of Thio…	0.244125	99	RSGASILQAGC	Carbamidomethyl(C)@11		cleaved C-U@C-term; missed R-S@1	-0.00123995	1118.55	560.282	1118.55	560.282	2	15	1.1.1.2036.17	22.346	71037.1	56423.4	22.31	0.15	13663.6
1	sp|Q16881|TRXR1_DROME; sp|Q16881-6|TRXR1_DROME; sp|Q16881-5|TRXR1_DROME; sp|Q16881-4|TRXR1_DROME; sp|Q16881-3|TRXR1_DROME; sp|Q16881-2|TRXR1_DROME	Thioredoxin reductase 1, cytoplasmic OS=Homo sapiens GN=TXNRD1 PE=1 SV=3; Isoform 6 of Thioredoxin reductase 1, cytoplasmic OS=Homo sapiens GN=TXNRD1; Isoform 5 of Thioredoxin reductase 1, cytoplasmic OS=Homo sapiens GN=TXNRD1; Isoform 4 of Thioredoxin reductase 1, cytoplasmic OS=Homo sapiens GN=TXNRD1; Isoform 3 of Thioredoxin reductase 1, cytoplasmic OS=Homo sapiens GN=TXNRD1; Isoform 2 of Thio…	0.183096	99	LMHQAALLGQAL			cleaved L-Q@C-term	-0.00105023	1264.7	633.355	1264.7	633.355	2	11	1.1.1.2386.9	39.4485	5599.33	4949.38	39.42	0.15	1699.96
1	sp|Q16881|TRXR1_DROME; sp|Q16881-6|TRXR1_DROME; sp|Q16881-5|TRXR1_DROME; sp|Q16881-4|TRXR1_DROME; sp|Q16881-3|TRXR1_DROME; sp|Q16881-2|TRXR1_DROME	Thioredoxin reductase 1, cytoplasmic OS=Homo sapiens GN=TXNRD1 PE=1 SV=3; Isoform 6 of Thioredoxin reductase 1, cytoplasmic OS=Homo sapiens GN=TXNRD1; Isoform 5 of Thioredoxin reductase 1, cytoplasmic OS=Homo sapiens GN=TXNRD1; Isoform 4 of Thioredoxin reductase 1, cytoplasmic OS=Homo sapiens GN=TXNRD1; Isoform 3 of Thioredoxin reductase 1, cytoplasmic OS=Homo sapiens GN=TXNRD1; Isoform 2 of Thio…	0.138466	99	LGQALQDSR			cleaved L-L@N-term	-0.000959523	986.513	494.264	986.515	494.265	2	14	1.1.1.1910.10	16.1803	15543.8	11704.1	16.12	0.1	1832.58
1	sp|Q16881|TRXR1_DROME; sp|Q16881-6|TRXR1_DROME; sp|Q16881-5|TRXR1_DROME; sp|Q16881-4|TRXR1_DROME; sp|Q16881-3|TRXR1_DROME; sp|Q16881-2|TRXR1_DROME	Thioredoxin reductase 1, cytoplasmic OS=Homo sapiens GN=TXNRD1 PE=1 SV=3; Isoform 6 of Thioredoxin reductase 1, cytoplasmic OS=Homo sapiens GN=TXNRD1; Isoform 5 of Thioredoxin reductase 1, cytoplasmic OS=Homo sapiens GN=TXNRD1; Isoform 4 of Thioredoxin reductase 1, cytoplasmic OS=Homo sapiens GN=TXNRD1; Isoform 3 of Thioredoxin reductase 1, cytoplasmic OS=Homo sapiens GN=TXNRD1; Isoform 2 of Thio…	0.0535477	99	YLGIPGDKEYCIS	Carbamidomethyl(C)@11		cleaved S-S@C-term; missed K-E@8	0.00082394	1513.71	757.864	1513.71	757.863	2	12	1.1.1.2371.17	38.7219	68430.9	25345	38.98	0.39	2560.16
1	sp|Q16881|TRXR1_DROME; sp|Q16881-6|TRXR1_DROME; sp|Q16881-5|TRXR1_DROME; sp|Q16881-4|TRXR1_DROME; sp|Q16881-3|TRXR1_DROME; sp|Q16881-2|TRXR1_DROME	Thioredoxin reductase 1, cytoplasmic OS=Homo sapiens GN=TXNRD1 PE=1 SV=3; Isoform 6 of Thioredoxin reductase 1, cytoplasmic OS=Homo sapiens GN=TXNRD1; Isoform 5 of Thioredoxin reductase 1, cytoplasmic OS=Homo sapiens GN=TXNRD1; Isoform 4 of Thioredoxin reductase 1, cytoplasmic OS=Homo sapiens GN=TXNRD1; Isoform 3 of Thioredoxin reductase 1, cytoplasmic OS=Homo sapiens GN=TXNRD1; Isoform 2 of Thio…	0.048177	99	KVVYENAYGQ			cleaved Q-F@C-term; missed K-V@1	-0.000671879	1169.57	585.793	1169.57	585.793	2	16	1.1.1.1997.11	20.4706	4314.37	4056.56	20.44	0.2	899.559
1	sp|Q16881|TRXR1_DROME; sp|Q16881-6|TRXR1_DROME; sp|Q16881-5|TRXR1_DROME; sp|Q16881-4|TRXR1_DROME; sp|Q16881-3|TRXR1_DROME; sp|Q16881-2|TRXR1_DROME	Thioredoxin reductase 1, cytoplasmic OS=Homo sapiens GN=TXNRD1 PE=1 SV=3; Isoform 6 of Thioredoxin reductase 1, cytoplasmic OS=Homo sapiens GN=TXNRD1; Isoform 5 of Thioredoxin reductase 1, cytoplasmic OS=Homo sapiens GN=TXNRD1; Isoform 4 of Thioredoxin reductase 1, cytoplasmic OS=Homo sapiens GN=TXNRD1; Isoform 3 of Thioredoxin reductase 1, cytoplasmic OS=Homo sapiens GN=TXNRD1; Isoform 2 of Thio…	0.0400052	99	VALECAGF	Carbamidomethyl(C)@5		cleaved Y-V@N-term; cleaved F-L@C-term	0.00183561	865.402	433.708	865.4	433.707	2	9	1.1.1.2326.3	36.5206	1259.33	590.46	36.42	0.2	441.975
1	sp|Q16881|TRXR1_DROME; sp|Q16881-6|TRXR1_DROME; sp|Q16881-5|TRXR1_DROME; sp|Q16881-4|TRXR1_DROME; sp|Q16881-3|TRXR1_DROME; sp|Q16881-2|TRXR1_DROME	Thioredoxin reductase 1, cytoplasmic OS=Homo sapiens GN=TXNRD1 PE=1 SV=3; Isoform 6 of Thioredoxin reductase 1, cytoplasmic OS=Homo sapiens GN=TXNRD1; Isoform 5 of Thioredoxin reductase 1, cytoplasmic OS=Homo sapiens GN=TXNRD1; Isoform 4 of Thioredoxin reductase 1, cytoplasmic OS=Homo sapiens GN=TXNRD1; Isoform 3 of Thioredoxin reductase 1, cytoplasmic OS=Homo sapiens GN=TXNRD1; Isoform 2 of Thio…	0.0381045	99	FGEENIEVY	Cation:Na(E)@4		cleaved Y-H@C-term	0.000365139	1120.47	561.242	1120.47	561.242	2	11	1.1.1.2378.4	39.0407	4345.34	4325.88	39.03	0.3	705.244
1	sp|Q16881|TRXR1_DROME; sp|Q16881-6|TRXR1_DROME; sp|Q16881-5|TRXR1_DROME; sp|Q16881-4|TRXR1_DROME; sp|Q16881-3|TRXR1_DROME; sp|Q16881-2|TRXR1_DROME	Thioredoxin reductase 1, cytoplasmic OS=Homo sapiens GN=TXNRD1 PE=1 SV=3; Isoform 6 of Thioredoxin reductase 1, cytoplasmic OS=Homo sapiens GN=TXNRD1; Isoform 5 of Thioredoxin reductase 1, cytoplasmic OS=Homo sapiens GN=TXNRD1; Isoform 4 of Thioredoxin reductase 1, cytoplasmic OS=Homo sapiens GN=TXNRD1; Isoform 3 of Thioredoxin reductase 1, cytoplasmic OS=Homo sapiens GN=TXNRD1; Isoform 2 of Thio…	0.0259491	99	EYGACGLSEEK	Carbamidomethyl(C)@5		cleaved L-E@N-term	-0.000926719	1241.52	621.769	1241.52	621.769	2	14	1.1.1.1995.17	20.3704	16757.8	16553.5	20.39	0.2	3788.28
1	sp|Q16881|TRXR1_DROME; sp|Q16881-6|TRXR1_DROME; sp|Q16881-5|TRXR1_DROME; sp|Q16881-4|TRXR1_DROME; sp|Q16881-3|TRXR1_DROME; sp|Q16881-2|TRXR1_DROME	Thioredoxin reductase 1, cytoplasmic OS=Homo sapiens GN=TXNRD1 PE=1 SV=3; Isoform 6 of Thioredoxin reductase 1, cytoplasmic OS=Homo sapiens GN=TXNRD1; Isoform 5 of Thioredoxin reductase 1, cytoplasmic OS=Homo sapiens GN=TXNRD1; Isoform 4 of Thioredoxin reductase 1, cytoplasmic OS=Homo sapiens GN=TXNRD1; Isoform 3 of Thioredoxin reductase 1, cytoplasmic OS=Homo sapiens GN=TXNRD1; Isoform 2 of Thio…	0.0245682	99	STNSEEIIEGEYNTV			cleaved Q-S@N-term; cleaved V-M@C-term	0.000853362	1683.75	842.881	1683.75	842.881	2	16	1.1.1.2379.6	39.1065	6759.17	6554.22	39.08	0.25	1120.81
1	sp|Q16881|TRXR1_DROME; sp|Q16881-6|TRXR1_DROME; sp|Q16881-5|TRXR1_DROME; sp|Q16881-4|TRXR1_DROME; sp|Q16881-3|TRXR1_DROME; sp|Q16881-2|TRXR1_DROME	Thioredoxin reductase 1, cytoplasmic OS=Homo sapiens GN=TXNRD1 PE=1 SV=3; Isoform 6 of Thioredoxin reductase 1, cytoplasmic OS=Homo sapiens GN=TXNRD1; Isoform 5 of Thioredoxin reductase 1, cytoplasmic OS=Homo sapiens GN=TXNRD1; Isoform 4 of Thioredoxin reductase 1, cytoplasmic OS=Homo sapiens GN=TXNRD1; Isoform 3 of Thioredoxin reductase 1, cytoplasmic OS=Homo sapiens GN=TXNRD1; Isoform 2 of Thio…	0.0204516	99	YLGIPGDKEY			cleaved Y-C@C-term; missed K-E@8	-0.000685644	1153.56	577.79	1153.57	577.79	2	12	1.1.1.2274.9	33.9704	19127.8	18680.4	33.96	0.2	4851.56
1	sp|Q16881|TRXR1_DROME; sp|Q16881-6|TRXR1_DROME; sp|Q16881-5|TRXR1_DROME; sp|Q16881-4|TRXR1_DROME; sp|Q16881-3|TRXR1_DROME; sp|Q16881-2|TRXR1_DROME	Thioredoxin reductase 1, cytoplasmic OS=Homo sapiens GN=TXNRD1 PE=1 SV=3; Isoform 6 of Thioredoxin reductase 1, cytoplasmic OS=Homo sapiens GN=TXNRD1; Isoform 5 of Thioredoxin reductase 1, cytoplasmic OS=Homo sapiens GN=TXNRD1; Isoform 4 of Thioredoxin reductase 1, cytoplasmic OS=Homo sapiens GN=TXNRD1; Isoform 3 of Thioredoxin reductase 1, cytoplasmic OS=Homo sapiens GN=TXNRD1; Isoform 2 of Thio…	0.0101054	99	VLGPNAGEVTQGFAA			cleaved H-V@N-term; cleaved A-A@C-term	3.28518e-05	1429.72	715.867	1429.72	715.867	2	11	1.1.1.2396.16	39.9473	6900.65	6362.71	39.92	0.2	1898.4
1	sp|Q16881|TRXR1_DROME; sp|Q16881-6|TRXR1_DROME; sp|Q16881-5|TRXR1_DROME; sp|Q16881-4|TRXR1_DROME; sp|Q16881-3|TRXR1_DROME; sp|Q16881-2|TRXR1_DROME	Thioredoxin reductase 1, cytoplasmic OS=Homo sapiens GN=TXNRD1 PE=1 SV=3; Isoform 6 of Thioredoxin reductase 1, cytoplasmic OS=Homo sapiens GN=TXNRD1; Isoform 5 of Thioredoxin reductase 1, cytoplasmic OS=Homo sapiens GN=TXNRD1; Isoform 4 of Thioredoxin reductase 1, cytoplasmic OS=Homo sapiens GN=TXNRD1; Isoform 3 of Thioredoxin reductase 1, cytoplasmic OS=Homo sapiens GN=TXNRD1; Isoform 2 of Thio…	0.00348834	99	TPLEYGAC	Carbamidomethyl(C)@8		cleaved F-T@N-term; cleaved C-G@C-term	0.00125054	909.391	455.703	909.39	455.702	2	10	1.1.1.2097.6	25.2442	3949.08	3371.1	25.18	0.25	1454.16
1	sp|Q16881|TRXR1_DROME; sp|Q16881-6|TRXR1_DROME; sp|Q16881-5|TRXR1_DROME; sp|Q16881-4|TRXR1_DROME; sp|Q16881-3|TRXR1_DROME; sp|Q16881-2|TRXR1_DROME	Thioredoxin reductase 1, cytoplasmic OS=Homo sapiens GN=TXNRD1 PE=1 SV=3; Isoform 6 of Thioredoxin reductase 1, cytoplasmic OS=Homo sapiens GN=TXNRD1; Isoform 5 of Thioredoxin reductase 1, cytoplasmic OS=Homo sapiens GN=TXNRD1; Isoform 4 of Thioredoxin reductase 1, cytoplasmic OS=Homo sapiens GN=TXNRD1; Isoform 3 of Thioredoxin reductase 1, cytoplasmic OS=Homo sapiens GN=TXNRD1; Isoform 2 of Thio…	0	99	AALLGQALQDSR			cleaved Q-A@N-term	-0.00184531	1241.67	621.843	1241.67	621.844	2	15	1.1.1.2231.18	31.8632	41803.3	32694.8	31.93	0.2	1180.49
1	sp|Q16881|TRXR1_DROME; sp|Q16881-6|TRXR1_DROME; sp|Q16881-5|TRXR1_DROME; sp|Q16881-4|TRXR1_DROME; sp|Q16881-3|TRXR1_DROME; sp|Q16881-2|TRXR1_DROME	Thioredoxin reductase 1, cytoplasmic OS=Homo sapiens GN=TXNRD1 PE=1 SV=3; Isoform 6 of Thioredoxin reductase 1, cytoplasmic OS=Homo sapiens GN=TXNRD1; Isoform 5 of Thioredoxin reductase 1, cytoplasmic OS=Homo sapiens GN=TXNRD1; Isoform 4 of Thioredoxin reductase 1, cytoplasmic OS=Homo sapiens GN=TXNRD1; Isoform 3 of Thioredoxin reductase 1, cytoplasmic OS=Homo sapiens GN=TXNRD1; Isoform 2 of Thio…	0	99	AALLGQALQDSR			cleaved Q-A@N-term	-0.00184531	1241.67	621.843	1241.67	621.844	2	21	1.1.1.2233.11	31.9515	41803.3	38096.6	31.93	0.2	10302.6
1	sp|Q16881|TRXR1_DROME; sp|Q16881-6|TRXR1_DROME; sp|Q16881-5|TRXR1_DROME; sp|Q16881-4|TRXR1_DROME; sp|Q16881-3|TRXR1_DROME; sp|Q16881-2|TRXR1_DROME	Thioredoxin reductase 1, cytoplasmic OS=Homo sapiens GN=TXNRD1 PE=1 SV=3; Isoform 6 of Thioredoxin reductase 1, cytoplasmic OS=Homo sapiens GN=TXNRD1; Isoform 5 of Thioredoxin reductase 1, cytoplasmic OS=Homo sapiens GN=TXNRD1; Isoform 4 of Thioredoxin reductase 1, cytoplasmic OS=Homo sapiens GN=TXNRD1; Isoform 3 of Thioredoxin reductase 1, cytoplasmic OS=Homo sapiens GN=TXNRD1; Isoform 2 of Thio…	0	99	AALLGQALQDSR			cleaved Q-A@N-term	-0.00184531	1241.67	621.843	1241.67	621.844	2	21	1.1.1.2234.3	32.009	41803.3	27221.8	31.93	0.2	8355.15
1	sp|Q16881|TRXR1_DROME; sp|Q16881-6|TRXR1_DROME; sp|Q16881-5|TRXR1_DROME; sp|Q16881-4|TRXR1_DROME; sp|Q16881-3|TRXR1_DROME; sp|Q16881-2|TRXR1_DROME	Thioredoxin reductase 1, cytoplasmic OS=Homo sapiens GN=TXNRD1 PE=1 SV=3; Isoform 6 of Thioredoxin reductase 1, cytoplasmic OS=Homo sapiens GN=TXNRD1; Isoform 5 of Thioredoxin reductase 1, cytoplasmic OS=Homo sapiens GN=TXNRD1; Isoform 4 of Thioredoxin reductase 1, cytoplasmic OS=Homo sapiens GN=TXNRD1; Isoform 3 of Thioredoxin reductase 1, cytoplasmic OS=Homo sapiens GN=TXNRD1; Isoform 2 of Thio…	0	99	AALLGQALQDSR			cleaved Q-A@N-term	-0.00184531	1241.67	621.843	1241.67	621.844	2	21	1.1.1.2235.3	32.0515	41803.3	20133.4	31.93	0.2	7507.65
1	sp|Q16881|TRXR1_DROME; sp|Q16881-6|TRXR1_DROME; sp|Q16881-5|TRXR1_DROME; sp|Q16881-4|TRXR1_DROME; sp|Q16881-3|TRXR1_DROME; sp|Q16881-2|TRXR1_DROME	Thioredoxin reductase 1, cytoplasmic OS=Homo sapiens GN=TXNRD1 PE=1 SV=3; Isoform 6 of Thioredoxin reductase 1, cytoplasmic OS=Homo sapiens GN=TXNRD1; Isoform 5 of Thioredoxin reductase 1, cytoplasmic OS=Homo sapiens GN=TXNRD1; Isoform 4 of Thioredoxin reductase 1, cytoplasmic OS=Homo sapiens GN=TXNRD1; Isoform 3 of Thioredoxin reductase 1, cytoplasmic OS=Homo sapiens GN=TXNRD1; Isoform 2 of Thio…	0	99	AALLGQALQDSR			cleaved Q-A@N-term	-0.00184531	1241.67	621.843	1241.67	621.844	2	19	1.1.1.2236.4	32.0962	41803.3	14318.5	31.93	0.2	6369.8
1	sp|Q16881|TRXR1_DROME; sp|Q16881-6|TRXR1_DROME; sp|Q16881-5|TRXR1_DROME; sp|Q16881-4|TRXR1_DROME; sp|Q16881-3|TRXR1_DROME; sp|Q16881-2|TRXR1_DROME	Thioredoxin reductase 1, cytoplasmic OS=Homo sapiens GN=TXNRD1 PE=1 SV=3; Isoform 6 of Thioredoxin reductase 1, cytoplasmic OS=Homo sapiens GN=TXNRD1; Isoform 5 of Thioredoxin reductase 1, cytoplasmic OS=Homo sapiens GN=TXNRD1; Isoform 4 of Thioredoxin reductase 1, cytoplasmic OS=Homo sapiens GN=TXNRD1; Isoform 3 of Thioredoxin reductase 1, cytoplasmic OS=Homo sapiens GN=TXNRD1; Isoform 2 of Thio…	0	99	AGEVTQGFAAALK			cleaved N-A@N-term	0.015902	1261.68	631.849	1261.67	631.841	2	13	1.1.1.2266.12	33.5811	5785.29	5240.52	33.66	0.49	1722.33
1	sp|Q16881|TRXR1_DROME; sp|Q16881-6|TRXR1_DROME; sp|Q16881-5|TRXR1_DROME; sp|Q16881-4|TRXR1_DROME; sp|Q16881-3|TRXR1_DROME; sp|Q16881-2|TRXR1_DROME	Thioredoxin reductase 1, cytoplasmic OS=Homo sapiens GN=TXNRD1 PE=1 SV=3; Isoform 6 of Thioredoxin reductase 1, cytoplasmic OS=Homo sapiens GN=TXNRD1; Isoform 5 of Thioredoxin reductase 1, cytoplasmic OS=Homo sapiens GN=TXNRD1; Isoform 4 of Thioredoxin reductase 1, cytoplasmic OS=Homo sapiens GN=TXNRD1; Isoform 3 of Thioredoxin reductase 1, cytoplasmic OS=Homo sapiens GN=TXNRD1; Isoform 2 of Thio…	0	99	AIGDILEDKVELTPVAIQ			cleaved Y-A@N-term; cleaved Q-A@C-term; missed K-V@9	-0.00137094	1923.06	962.535	1923.06	962.536	2	23	1.1.1.2495.16	44.8407	135641	134301	44.84	0.1	20825.6
1	sp|Q16881|TRXR1_DROME; sp|Q16881-6|TRXR1_DROME; sp|Q16881-5|TRXR1_DROME; sp|Q16881-4|TRXR1_DROME; sp|Q16881-3|TRXR1_DROME; sp|Q16881-2|TRXR1_DROME	Thioredoxin reductase 1, cytoplasmic OS=Homo sapiens GN=TXNRD1 PE=1 SV=3; Isoform 6 of Thioredoxin reductase 1, cytoplasmic OS=Homo sapiens GN=TXNRD1; Isoform 5 of Thioredoxin reductase 1, cytoplasmic OS=Homo sapiens GN=TXNRD1; Isoform 4 of Thioredoxin reductase 1, cytoplasmic OS=Homo sapiens GN=TXNRD1; Isoform 3 of Thioredoxin reductase 1, cytoplasmic OS=Homo sapiens GN=TXNRD1; Isoform 2 of Thio…	0	99	AIGDILEDKVELTPVAIQ			cleaved Y-A@N-term; cleaved Q-A@C-term; missed K-V@9	-0.00137094	1923.06	962.535	1923.06	962.536	2	18	1.1.1.2497.13	44.9291	135641	42285.4	44.84	0.1	2347.46
1	sp|Q16881|TRXR1_DROME; sp|Q16881-6|TRXR1_DROME; sp|Q16881-5|TRXR1_DROME; sp|Q16881-4|TRXR1_DROME; sp|Q16881-3|TRXR1_DROME; sp|Q16881-2|TRXR1_DROME	Thioredoxin reductase 1, cytoplasmic OS=Homo sapiens GN=TXNRD1 PE=1 SV=3; Isoform 6 of Thioredoxin reductase 1, cytoplasmic OS=Homo sapiens GN=TXNRD1; Isoform 5 of Thioredoxin reductase 1, cytoplasmic OS=Homo sapiens GN=TXNRD1; Isoform 4 of Thioredoxin reductase 1, cytoplasmic OS=Homo sapiens GN=TXNRD1; Isoform 3 of Thioredoxin reductase 1, cytoplasmic OS=Homo sapiens GN=TXNRD1; Isoform 2 of Thio…	0	99	AIGDILEDKVELTPVAIQAGR			cleaved Y-A@N-term; missed K-V@9	-0.0024985	2207.21	736.745	2207.22	736.746	3	26	1.1.1.2472.11	43.6826	470499	378478	43.75	0.15	121059
1	sp|Q16881|TRXR1_DROME; sp|Q16881-6|TRXR1_DROME; sp|Q16881-5|TRXR1_DROME; sp|Q16881-4|TRXR1_DROME; sp|Q16881-3|TRXR1_DROME; sp|Q16881-2|TRXR1_DROME	Thioredoxin reductase 1, cytoplasmic OS=Homo sapiens GN=TXNRD1 PE=1 SV=3; Isoform 6 of Thioredoxin reductase 1, cytoplasmic OS=Homo sapiens GN=TXNRD1; Isoform 5 of Thioredoxin reductase 1, cytoplasmic OS=Homo sapiens GN=TXNRD1; Isoform 4 of Thioredoxin reductase 1, cytoplasmic OS=Homo sapiens GN=TXNRD1; Isoform 3 of Thioredoxin reductase 1, cytoplasmic OS=Homo sapiens GN=TXNRD1; Isoform 2 of Thio…	0	99	AIGDILEDKVELTPVAIQAGR			cleaved Y-A@N-term; missed K-V@9	-0.0024985	2207.21	736.745	2207.22	736.746	3	26	1.1.1.2473.15	43.7388	470499	463725	43.75	0.15	173875
1	sp|Q16881|TRXR1_DROME; sp|Q16881-6|TRXR1_DROME; sp|Q16881-5|TRXR1_DROME; sp|Q16881-4|TRXR1_DROME; sp|Q16881-3|TRXR1_DROME; sp|Q16881-2|TRXR1_DROME	Thioredoxin reductase 1, cytoplasmic OS=Homo sapiens GN=TXNRD1 PE=1 SV=3; Isoform 6 of Thioredoxin reductase 1, cytoplasmic OS=Homo sapiens GN=TXNRD1; Isoform 5 of Thioredoxin reductase 1, cytoplasmic OS=Homo sapiens GN=TXNRD1; Isoform 4 of Thioredoxin reductase 1, cytoplasmic OS=Homo sapiens GN=TXNRD1; Isoform 3 of Thioredoxin reductase 1, cytoplasmic OS=Homo sapiens GN=TXNRD1; Isoform 2 of Thio…	0	99	AIGDILEDKVELTPVAIQAGR			cleaved Y-A@N-term; missed K-V@9	0.00245377	2207.22	552.812	2207.22	552.811	4	22	1.1.1.2474.4	43.7698	140376	129327	43.75	0.1	19296.2
1	sp|Q16881|TRXR1_DROME; sp|Q16881-6|TRXR1_DROME; sp|Q16881-5|TRXR1_DROME; sp|Q16881-4|TRXR1_DROME; sp|Q16881-3|TRXR1_DROME; sp|Q16881-2|TRXR1_DROME	Thioredoxin reductase 1, cytoplasmic OS=Homo sapiens GN=TXNRD1 PE=1 SV=3; Isoform 6 of Thioredoxin reductase 1, cytoplasmic OS=Homo sapiens GN=TXNRD1; Isoform 5 of Thioredoxin reductase 1, cytoplasmic OS=Homo sapiens GN=TXNRD1; Isoform 4 of Thioredoxin reductase 1, cytoplasmic OS=Homo sapiens GN=TXNRD1; Isoform 3 of Thioredoxin reductase 1, cytoplasmic OS=Homo sapiens GN=TXNRD1; Isoform 2 of Thio…	0	99	AIGDILEDKVELTPVAIQAGR			cleaved Y-A@N-term; missed K-V@9	-0.0024985	2207.21	736.745	2207.22	736.746	3	26	1.1.1.2475.7	43.8358	470499	172287	43.75	0.15	23296.6
1	sp|Q16881|TRXR1_DROME; sp|Q16881-6|TRXR1_DROME; sp|Q16881-5|TRXR1_DROME; sp|Q16881-4|TRXR1_DROME; sp|Q16881-3|TRXR1_DROME; sp|Q16881-2|TRXR1_DROME	Thioredoxin reductase 1, cytoplasmic OS=Homo sapiens GN=TXNRD1 PE=1 SV=3; Isoform 6 of Thioredoxin reductase 1, cytoplasmic OS=Homo sapiens GN=TXNRD1; Isoform 5 of Thioredoxin reductase 1, cytoplasmic OS=Homo sapiens GN=TXNRD1; Isoform 4 of Thioredoxin reductase 1, cytoplasmic OS=Homo sapiens GN=TXNRD1; Isoform 3 of Thioredoxin reductase 1, cytoplasmic OS=Homo sapiens GN=TXNRD1; Isoform 2 of Thio…	0	99	AIGDILEDKVELTPVAIQAGR			cleaved Y-A@N-term; missed K-V@9	-0.0024985	2207.21	736.745	2207.22	736.746	3	19	1.1.1.2476.9	43.8771	470499	86865	43.75	0.15	2263.66
1	sp|Q16881|TRXR1_DROME; sp|Q16881-6|TRXR1_DROME; sp|Q16881-5|TRXR1_DROME; sp|Q16881-4|TRXR1_DROME; sp|Q16881-3|TRXR1_DROME; sp|Q16881-2|TRXR1_DROME	Thioredoxin reductase 1, cytoplasmic OS=Homo sapiens GN=TXNRD1 PE=1 SV=3; Isoform 6 of Thioredoxin reductase 1, cytoplasmic OS=Homo sapiens GN=TXNRD1; Isoform 5 of Thioredoxin reductase 1, cytoplasmic OS=Homo sapiens GN=TXNRD1; Isoform 4 of Thioredoxin reductase 1, cytoplasmic OS=Homo sapiens GN=TXNRD1; Isoform 3 of Thioredoxin reductase 1, cytoplasmic OS=Homo sapiens GN=TXNRD1; Isoform 2 of Thio…	0	99	AIGDILEDKVELTPVAIQAGR			cleaved Y-A@N-term; missed K-V@9	-0.0024985	2207.21	736.745	2207.22	736.746	3	23	1.1.1.2476.10	43.8788	470499	84313.8	43.75	0.15	9201.35
1	sp|Q16881|TRXR1_DROME; sp|Q16881-6|TRXR1_DROME; sp|Q16881-5|TRXR1_DROME; sp|Q16881-4|TRXR1_DROME; sp|Q16881-3|TRXR1_DROME; sp|Q16881-2|TRXR1_DROME	Thioredoxin reductase 1, cytoplasmic OS=Homo sapiens GN=TXNRD1 PE=1 SV=3; Isoform 6 of Thioredoxin reductase 1, cytoplasmic OS=Homo sapiens GN=TXNRD1; Isoform 5 of Thioredoxin reductase 1, cytoplasmic OS=Homo sapiens GN=TXNRD1; Isoform 4 of Thioredoxin reductase 1, cytoplasmic OS=Homo sapiens GN=TXNRD1; Isoform 3 of Thioredoxin reductase 1, cytoplasmic OS=Homo sapiens GN=TXNRD1; Isoform 2 of Thio…	0	99	AIGDILEDKVELTPVAIQAGR			cleaved Y-A@N-term; missed K-V@9	-0.0024985	2207.21	736.745	2207.22	736.746	3	22	1.1.1.2477.10	43.9284	470499	29750.7	43.75	0.15	4142.04
1	sp|Q16881|TRXR1_DROME; sp|Q16881-6|TRXR1_DROME; sp|Q16881-5|TRXR1_DROME; sp|Q16881-4|TRXR1_DROME; sp|Q16881-3|TRXR1_DROME; sp|Q16881-2|TRXR1_DROME	Thioredoxin reductase 1, cytoplasmic OS=Homo sapiens GN=TXNRD1 PE=1 SV=3; Isoform 6 of Thioredoxin reductase 1, cytoplasmic OS=Homo sapiens GN=TXNRD1; Isoform 5 of Thioredoxin reductase 1, cytoplasmic OS=Homo sapiens GN=TXNRD1; Isoform 4 of Thioredoxin reductase 1, cytoplasmic OS=Homo sapiens GN=TXNRD1; Isoform 3 of Thioredoxin reductase 1, cytoplasmic OS=Homo sapiens GN=TXNRD1; Isoform 2 of Thio…	0	99	ALLGQALQDSR			cleaved A-A@N-term	0.000499621	1170.64	586.325	1170.64	586.325	2	19	1.1.1.2192.16	29.9434	101871	92455	29.92	0.15	16658.9
1	sp|Q16881|TRXR1_DROME; sp|Q16881-6|TRXR1_DROME; sp|Q16881-5|TRXR1_DROME; sp|Q16881-4|TRXR1_DROME; sp|Q16881-3|TRXR1_DROME; sp|Q16881-2|TRXR1_DROME	Thioredoxin reductase 1, cytoplasmic OS=Homo sapiens GN=TXNRD1 PE=1 SV=3; Isoform 6 of Thioredoxin reductase 1, cytoplasmic OS=Homo sapiens GN=TXNRD1; Isoform 5 of Thioredoxin reductase 1, cytoplasmic OS=Homo sapiens GN=TXNRD1; Isoform 4 of Thioredoxin reductase 1, cytoplasmic OS=Homo sapiens GN=TXNRD1; Isoform 3 of Thioredoxin reductase 1, cytoplasmic OS=Homo sapiens GN=TXNRD1; Isoform 2 of Thio…	0	99	CDYENVPTTVFTPLEYGACGLSEEK	Carbamidomethyl(C)@1; Carbamidomethyl(C)@19			0.000526316	2878.27	960.43	2878.27	960.43	3	19	1.1.1.2495.15	44.8374	19069	13765.7	44.8	0.1	2933.52
1	sp|Q16881|TRXR1_DROME; sp|Q16881-6|TRXR1_DROME; sp|Q16881-5|TRXR1_DROME; sp|Q16881-4|TRXR1_DROME; sp|Q16881-3|TRXR1_DROME; sp|Q16881-2|TRXR1_DROME	Thioredoxin reductase 1, cytoplasmic OS=Homo sapiens GN=TXNRD1 PE=1 SV=3; Isoform 6 of Thioredoxin reductase 1, cytoplasmic OS=Homo sapiens GN=TXNRD1; Isoform 5 of Thioredoxin reductase 1, cytoplasmic OS=Homo sapiens GN=TXNRD1; Isoform 4 of Thioredoxin reductase 1, cytoplasmic OS=Homo sapiens GN=TXNRD1; Isoform 3 of Thioredoxin reductase 1, cytoplasmic OS=Homo sapiens GN=TXNRD1; Isoform 2 of Thio…	0	99	DFVTPTPLGTR			cleaved L-D@N-term	-0.000462829	1202.63	602.322	1202.63	602.322	2	15	1.1.1.2283.9	34.4311	86824.7	82124.9	34.45	0.2	19062
1	sp|Q16881|TRXR1_DROME; sp|Q16881-6|TRXR1_DROME; sp|Q16881-5|TRXR1_DROME; sp|Q16881-4|TRXR1_DROME; sp|Q16881-3|TRXR1_DROME; sp|Q16881-2|TRXR1_DROME	Thioredoxin reductase 1, cytoplasmic OS=Homo sapiens GN=TXNRD1 PE=1 SV=3; Isoform 6 of Thioredoxin reductase 1, cytoplasmic OS=Homo sapiens GN=TXNRD1; Isoform 5 of Thioredoxin reductase 1, cytoplasmic OS=Homo sapiens GN=TXNRD1; Isoform 4 of Thioredoxin reductase 1, cytoplasmic OS=Homo sapiens GN=TXNRD1; Isoform 3 of Thioredoxin reductase 1, cytoplasmic OS=Homo sapiens GN=TXNRD1; Isoform 2 of Thio…	0	99	DFVTPTPLGTR			cleaved L-D@N-term	-0.000462829	1202.63	602.322	1202.63	602.322	2	16	1.1.1.2284.13	34.4704	86824.7	83360.3	34.45	0.2	17957.4
1	sp|Q16881|TRXR1_DROME; sp|Q16881-6|TRXR1_DROME; sp|Q16881-5|TRXR1_DROME; sp|Q16881-4|TRXR1_DROME; sp|Q16881-3|TRXR1_DROME; sp|Q16881-2|TRXR1_DROME	Thioredoxin reductase 1, cytoplasmic OS=Homo sapiens GN=TXNRD1 PE=1 SV=3; Isoform 6 of Thioredoxin reductase 1, cytoplasmic OS=Homo sapiens GN=TXNRD1; Isoform 5 of Thioredoxin reductase 1, cytoplasmic OS=Homo sapiens GN=TXNRD1; Isoform 4 of Thioredoxin reductase 1, cytoplasmic OS=Homo sapiens GN=TXNRD1; Isoform 3 of Thioredoxin reductase 1, cytoplasmic OS=Homo sapiens GN=TXNRD1; Isoform 2 of Thio…	0	99	DFVTPTPLGTR			cleaved L-D@N-term	-0.000462829	1202.63	602.322	1202.63	602.322	2	12	1.1.1.2285.18	34.5266	86824.7	64701.2	34.45	0.2	12266.9
1	sp|Q16881|TRXR1_DROME; sp|Q16881-6|TRXR1_DROME; sp|Q16881-5|TRXR1_DROME; sp|Q16881-4|TRXR1_DROME; sp|Q16881-3|TRXR1_DROME; sp|Q16881-2|TRXR1_DROME	Thioredoxin reductase 1, cytoplasmic OS=Homo sapiens GN=TXNRD1 PE=1 SV=3; Isoform 6 of Thioredoxin reductase 1, cytoplasmic OS=Homo sapiens GN=TXNRD1; Isoform 5 of Thioredoxin reductase 1, cytoplasmic OS=Homo sapiens GN=TXNRD1; Isoform 4 of Thioredoxin reductase 1, cytoplasmic OS=Homo sapiens GN=TXNRD1; Isoform 3 of Thioredoxin reductase 1, cytoplasmic OS=Homo sapiens GN=TXNRD1; Isoform 2 of Thio…	0	99	EYGACGLSEEK	Carbamidomethyl(C)@5		cleaved L-E@N-term	-0.000926719	1241.52	621.769	1241.52	621.769	2	15	1.1.1.1994.23	20.3313	16757.8	15077.8	20.39	0.2	3806.88
1	sp|Q16881|TRXR1_DROME; sp|Q16881-6|TRXR1_DROME; sp|Q16881-5|TRXR1_DROME; sp|Q16881-4|TRXR1_DROME; sp|Q16881-3|TRXR1_DROME; sp|Q16881-2|TRXR1_DROME	Thioredoxin reductase 1, cytoplasmic OS=Homo sapiens GN=TXNRD1 PE=1 SV=3; Isoform 6 of Thioredoxin reductase 1, cytoplasmic OS=Homo sapiens GN=TXNRD1; Isoform 5 of Thioredoxin reductase 1, cytoplasmic OS=Homo sapiens GN=TXNRD1; Isoform 4 of Thioredoxin reductase 1, cytoplasmic OS=Homo sapiens GN=TXNRD1; Isoform 3 of Thioredoxin reductase 1, cytoplasmic OS=Homo sapiens GN=TXNRD1; Isoform 2 of Thio…	0	99	FGEENIEVY	Cation:Na(E)@7		cleaved Y-H@C-term	0.000365139	1120.47	561.242	1120.47	561.242	2	12	1.1.1.2380.5	39.1405	4345.34	3404.68	39.03	0.3	684.347
1	sp|Q16881|TRXR1_DROME; sp|Q16881-6|TRXR1_DROME; sp|Q16881-5|TRXR1_DROME; sp|Q16881-4|TRXR1_DROME; sp|Q16881-3|TRXR1_DROME; sp|Q16881-2|TRXR1_DROME	Thioredoxin reductase 1, cytoplasmic OS=Homo sapiens GN=TXNRD1 PE=1 SV=3; Isoform 6 of Thioredoxin reductase 1, cytoplasmic OS=Homo sapiens GN=TXNRD1; Isoform 5 of Thioredoxin reductase 1, cytoplasmic OS=Homo sapiens GN=TXNRD1; Isoform 4 of Thioredoxin reductase 1, cytoplasmic OS=Homo sapiens GN=TXNRD1; Isoform 3 of Thioredoxin reductase 1, cytoplasmic OS=Homo sapiens GN=TXNRD1; Isoform 2 of Thio…	0	99	FGEENIEVY	Cation:Na(E)@4		cleaved Y-H@C-term	0.000365139	1120.47	561.242	1120.47	561.242	2	10	1.1.1.2376.5	38.9572	4345.34	3865	39.03	0.3	741.233
1	sp|Q16881|TRXR1_DROME; sp|Q16881-6|TRXR1_DROME; sp|Q16881-5|TRXR1_DROME; sp|Q16881-4|TRXR1_DROME; sp|Q16881-3|TRXR1_DROME; sp|Q16881-2|TRXR1_DROME	Thioredoxin reductase 1, cytoplasmic OS=Homo sapiens GN=TXNRD1 PE=1 SV=3; Isoform 6 of Thioredoxin reductase 1, cytoplasmic OS=Homo sapiens GN=TXNRD1; Isoform 5 of Thioredoxin reductase 1, cytoplasmic OS=Homo sapiens GN=TXNRD1; Isoform 4 of Thioredoxin reductase 1, cytoplasmic OS=Homo sapiens GN=TXNRD1; Isoform 3 of Thioredoxin reductase 1, cytoplasmic OS=Homo sapiens GN=TXNRD1; Isoform 2 of Thio…	0	99	FGEENIEVY	Cation:Na(E)@7		cleaved Y-H@C-term	0.000365139	1120.47	561.242	1120.47	561.242	2	11	1.1.1.2376.5	38.9572	4345.34	3865	39.03	0.3	741.233
1	sp|Q16881|TRXR1_DROME; sp|Q16881-6|TRXR1_DROME; sp|Q16881-5|TRXR1_DROME; sp|Q16881-4|TRXR1_DROME; sp|Q16881-3|TRXR1_DROME; sp|Q16881-2|TRXR1_DROME	Thioredoxin reductase 1, cytoplasmic OS=Homo sapiens GN=TXNRD1 PE=1 SV=3; Isoform 6 of Thioredoxin reductase 1, cytoplasmic OS=Homo sapiens GN=TXNRD1; Isoform 5 of Thioredoxin reductase 1, cytoplasmic OS=Homo sapiens GN=TXNRD1; Isoform 4 of Thioredoxin reductase 1, cytoplasmic OS=Homo sapiens GN=TXNRD1; Isoform 3 of Thioredoxin reductase 1, cytoplasmic OS=Homo sapiens GN=TXNRD1; Isoform 2 of Thio…	0	99	FGEENIEVYHS			cleaved S-Y@C-term	0.00147621	1322.58	662.297	1322.58	662.296	2	16	1.1.1.2240.15	32.3018	16466	13059.6	32.23	0.2	2577.73
1	sp|Q16881|TRXR1_DROME; sp|Q16881-6|TRXR1_DROME; sp|Q16881-5|TRXR1_DROME; sp|Q16881-4|TRXR1_DROME; sp|Q16881-3|TRXR1_DROME; sp|Q16881-2|TRXR1_DROME	Thioredoxin reductase 1, cytoplasmic OS=Homo sapiens GN=TXNRD1 PE=1 SV=3; Isoform 6 of Thioredoxin reductase 1, cytoplasmic OS=Homo sapiens GN=TXNRD1; Isoform 5 of Thioredoxin reductase 1, cytoplasmic OS=Homo sapiens GN=TXNRD1; Isoform 4 of Thioredoxin reductase 1, cytoplasmic OS=Homo sapiens GN=TXNRD1; Isoform 3 of Thioredoxin reductase 1, cytoplasmic OS=Homo sapiens GN=TXNRD1; Isoform 2 of Thio…	0	99	FGEENIEVYHSY			cleaved Y-F@C-term	0.0032743	1485.64	743.83	1485.64	743.828	2	20	1.1.1.2321.6	36.299	135.229	135.229			18390.5
1	sp|Q16881|TRXR1_DROME; sp|Q16881-6|TRXR1_DROME; sp|Q16881-5|TRXR1_DROME; sp|Q16881-4|TRXR1_DROME; sp|Q16881-3|TRXR1_DROME; sp|Q16881-2|TRXR1_DROME	Thioredoxin reductase 1, cytoplasmic OS=Homo sapiens GN=TXNRD1 PE=1 SV=3; Isoform 6 of Thioredoxin reductase 1, cytoplasmic OS=Homo sapiens GN=TXNRD1; Isoform 5 of Thioredoxin reductase 1, cytoplasmic OS=Homo sapiens GN=TXNRD1; Isoform 4 of Thioredoxin reductase 1, cytoplasmic OS=Homo sapiens GN=TXNRD1; Isoform 3 of Thioredoxin reductase 1, cytoplasmic OS=Homo sapiens GN=TXNRD1; Isoform 2 of Thio…	0	99	FGEENIEVYHSY			cleaved Y-F@C-term	-0.00124231	1485.64	743.827	1485.64	743.828	2	20	1.1.1.2318.7	36.1437	224125	198490	36.12	0.15	42924.6
1	sp|Q16881|TRXR1_DROME; sp|Q16881-6|TRXR1_DROME; sp|Q16881-5|TRXR1_DROME; sp|Q16881-4|TRXR1_DROME; sp|Q16881-3|TRXR1_DROME; sp|Q16881-2|TRXR1_DROME	Thioredoxin reductase 1, cytoplasmic OS=Homo sapiens GN=TXNRD1 PE=1 SV=3; Isoform 6 of Thioredoxin reductase 1, cytoplasmic OS=Homo sapiens GN=TXNRD1; Isoform 5 of Thioredoxin reductase 1, cytoplasmic OS=Homo sapiens GN=TXNRD1; Isoform 4 of Thioredoxin reductase 1, cytoplasmic OS=Homo sapiens GN=TXNRD1; Isoform 3 of Thioredoxin reductase 1, cytoplasmic OS=Homo sapiens GN=TXNRD1; Isoform 2 of Thio…	0	99	FGEENIEVYHSY			cleaved Y-F@C-term	-0.00124231	1485.64	743.827	1485.64	743.828	2	20	1.1.1.2317.9	36.101	224125	199452	36.12	0.15	38974.4
1	sp|Q16881|TRXR1_DROME; sp|Q16881-6|TRXR1_DROME; sp|Q16881-5|TRXR1_DROME; sp|Q16881-4|TRXR1_DROME; sp|Q16881-3|TRXR1_DROME; sp|Q16881-2|TRXR1_DROME	Thioredoxin reductase 1, cytoplasmic OS=Homo sapiens GN=TXNRD1 PE=1 SV=3; Isoform 6 of Thioredoxin reductase 1, cytoplasmic OS=Homo sapiens GN=TXNRD1; Isoform 5 of Thioredoxin reductase 1, cytoplasmic OS=Homo sapiens GN=TXNRD1; Isoform 4 of Thioredoxin reductase 1, cytoplasmic OS=Homo sapiens GN=TXNRD1; Isoform 3 of Thioredoxin reductase 1, cytoplasmic OS=Homo sapiens GN=TXNRD1; Isoform 2 of Thio…	0	99	FLIATGER			cleaved R-P@C-term	0.000420191	905.497	453.756	905.497	453.756	2	10	1.1.1.2124.2	26.5675	8017.54	5236.85	26.71	0.29	1465.86
1	sp|Q16881|TRXR1_DROME; sp|Q16881-6|TRXR1_DROME; sp|Q16881-5|TRXR1_DROME; sp|Q16881-4|TRXR1_DROME; sp|Q16881-3|TRXR1_DROME; sp|Q16881-2|TRXR1_DROME	Thioredoxin reductase 1, cytoplasmic OS=Homo sapiens GN=TXNRD1 PE=1 SV=3; Isoform 6 of Thioredoxin reductase 1, cytoplasmic OS=Homo sapiens GN=TXNRD1; Isoform 5 of Thioredoxin reductase 1, cytoplasmic OS=Homo sapiens GN=TXNRD1; Isoform 4 of Thioredoxin reductase 1, cytoplasmic OS=Homo sapiens GN=TXNRD1; Isoform 3 of Thioredoxin reductase 1, cytoplasmic OS=Homo sapiens GN=TXNRD1; Isoform 2 of Thio…	0	99	FLIATGERPR				0.000871615	1158.65	580.333	1158.65	580.333	2	16	1.1.1.2081.19	24.4782	207126	190834	24.54	0.3	36509.7
1	sp|Q16881|TRXR1_DROME; sp|Q16881-6|TRXR1_DROME; sp|Q16881-5|TRXR1_DROME; sp|Q16881-4|TRXR1_DROME; sp|Q16881-3|TRXR1_DROME; sp|Q16881-2|TRXR1_DROME	Thioredoxin reductase 1, cytoplasmic OS=Homo sapiens GN=TXNRD1 PE=1 SV=3; Isoform 6 of Thioredoxin reductase 1, cytoplasmic OS=Homo sapiens GN=TXNRD1; Isoform 5 of Thioredoxin reductase 1, cytoplasmic OS=Homo sapiens GN=TXNRD1; Isoform 4 of Thioredoxin reductase 1, cytoplasmic OS=Homo sapiens GN=TXNRD1; Isoform 3 of Thioredoxin reductase 1, cytoplasmic OS=Homo sapiens GN=TXNRD1; Isoform 2 of Thio…	0	99	FLIATGERPR				0.000871615	1158.65	580.333	1158.65	580.333	2	17	1.1.1.2082.20	24.5292	207126	207090	24.54	0.3	38742.3
1	sp|Q16881|TRXR1_DROME; sp|Q16881-6|TRXR1_DROME; sp|Q16881-5|TRXR1_DROME; sp|Q16881-4|TRXR1_DROME; sp|Q16881-3|TRXR1_DROME; sp|Q16881-2|TRXR1_DROME	Thioredoxin reductase 1, cytoplasmic OS=Homo sapiens GN=TXNRD1 PE=1 SV=3; Isoform 6 of Thioredoxin reductase 1, cytoplasmic OS=Homo sapiens GN=TXNRD1; Isoform 5 of Thioredoxin reductase 1, cytoplasmic OS=Homo sapiens GN=TXNRD1; Isoform 4 of Thioredoxin reductase 1, cytoplasmic OS=Homo sapiens GN=TXNRD1; Isoform 3 of Thioredoxin reductase 1, cytoplasmic OS=Homo sapiens GN=TXNRD1; Isoform 2 of Thio…	0	99	FLIATGERPR				0.000871615	1158.65	580.333	1158.65	580.333	2	16	1.1.1.2083.18	24.5752	207126	196272	24.54	0.3	35843.6
1	sp|Q16881|TRXR1_DROME; sp|Q16881-6|TRXR1_DROME; sp|Q16881-5|TRXR1_DROME; sp|Q16881-4|TRXR1_DROME; sp|Q16881-3|TRXR1_DROME; sp|Q16881-2|TRXR1_DROME	Thioredoxin reductase 1, cytoplasmic OS=Homo sapiens GN=TXNRD1 PE=1 SV=3; Isoform 6 of Thioredoxin reductase 1, cytoplasmic OS=Homo sapiens GN=TXNRD1; Isoform 5 of Thioredoxin reductase 1, cytoplasmic OS=Homo sapiens GN=TXNRD1; Isoform 4 of Thioredoxin reductase 1, cytoplasmic OS=Homo sapiens GN=TXNRD1; Isoform 3 of Thioredoxin reductase 1, cytoplasmic OS=Homo sapiens GN=TXNRD1; Isoform 2 of Thio…	0	99	FLIATGERPR				0.000871615	1158.65	580.333	1158.65	580.333	2	16	1.1.1.2084.17	24.6227	207126	177318	24.54	0.3	34063.4
1	sp|Q16881|TRXR1_DROME; sp|Q16881-6|TRXR1_DROME; sp|Q16881-5|TRXR1_DROME; sp|Q16881-4|TRXR1_DROME; sp|Q16881-3|TRXR1_DROME; sp|Q16881-2|TRXR1_DROME	Thioredoxin reductase 1, cytoplasmic OS=Homo sapiens GN=TXNRD1 PE=1 SV=3; Isoform 6 of Thioredoxin reductase 1, cytoplasmic OS=Homo sapiens GN=TXNRD1; Isoform 5 of Thioredoxin reductase 1, cytoplasmic OS=Homo sapiens GN=TXNRD1; Isoform 4 of Thioredoxin reductase 1, cytoplasmic OS=Homo sapiens GN=TXNRD1; Isoform 3 of Thioredoxin reductase 1, cytoplasmic OS=Homo sapiens GN=TXNRD1; Isoform 2 of Thio…	0	99	FLIATGERPR				0.000871615	1158.65	580.333	1158.65	580.333	2	17	1.1.1.2086.13	24.7264	207126	115005	24.54	0.3	21862.8
1	sp|Q16881|TRXR1_DROME; sp|Q16881-6|TRXR1_DROME; sp|Q16881-5|TRXR1_DROME; sp|Q16881-4|TRXR1_DROME; sp|Q16881-3|TRXR1_DROME; sp|Q16881-2|TRXR1_DROME	Thioredoxin reductase 1, cytoplasmic OS=Homo sapiens GN=TXNRD1 PE=1 SV=3; Isoform 6 of Thioredoxin reductase 1, cytoplasmic OS=Homo sapiens GN=TXNRD1; Isoform 5 of Thioredoxin reductase 1, cytoplasmic OS=Homo sapiens GN=TXNRD1; Isoform 4 of Thioredoxin reductase 1, cytoplasmic OS=Homo sapiens GN=TXNRD1; Isoform 3 of Thioredoxin reductase 1, cytoplasmic OS=Homo sapiens GN=TXNRD1; Isoform 2 of Thio…	0	99	FLIATGERPR				0.000871615	1158.65	580.333	1158.65	580.333	2	16	1.1.1.2087.15	24.7674	207126	87358.9	24.54	0.3	16295.3
1	sp|Q16881|TRXR1_DROME; sp|Q16881-6|TRXR1_DROME; sp|Q16881-5|TRXR1_DROME; sp|Q16881-4|TRXR1_DROME; sp|Q16881-3|TRXR1_DROME; sp|Q16881-2|TRXR1_DROME	Thioredoxin reductase 1, cytoplasmic OS=Homo sapiens GN=TXNRD1 PE=1 SV=3; Isoform 6 of Thioredoxin reductase 1, cytoplasmic OS=Homo sapiens GN=TXNRD1; Isoform 5 of Thioredoxin reductase 1, cytoplasmic OS=Homo sapiens GN=TXNRD1; Isoform 4 of Thioredoxin reductase 1, cytoplasmic OS=Homo sapiens GN=TXNRD1; Isoform 3 of Thioredoxin reductase 1, cytoplasmic OS=Homo sapiens GN=TXNRD1; Isoform 2 of Thio…	0	99	FLIATGERPR				0.000871615	1158.65	580.333	1158.65	580.333	2	14	1.1.1.2088.22	24.828	207126	48626.9	24.54	0.3	8984.48
1	sp|Q16881|TRXR1_DROME; sp|Q16881-6|TRXR1_DROME; sp|Q16881-5|TRXR1_DROME; sp|Q16881-4|TRXR1_DROME; sp|Q16881-3|TRXR1_DROME; sp|Q16881-2|TRXR1_DROME	Thioredoxin reductase 1, cytoplasmic OS=Homo sapiens GN=TXNRD1 PE=1 SV=3; Isoform 6 of Thioredoxin reductase 1, cytoplasmic OS=Homo sapiens GN=TXNRD1; Isoform 5 of Thioredoxin reductase 1, cytoplasmic OS=Homo sapiens GN=TXNRD1; Isoform 4 of Thioredoxin reductase 1, cytoplasmic OS=Homo sapiens GN=TXNRD1; Isoform 3 of Thioredoxin reductase 1, cytoplasmic OS=Homo sapiens GN=TXNRD1; Isoform 2 of Thio…	0	99	GACGLSEEK	Carbamidomethyl(C)@3		cleaved Y-G@N-term	0.00257439	949.42	475.717	949.417	475.716	2	12	1.1.1.1833.5	12.5215	7462.01	4251.12	12.4	0.2	1033.92
1	sp|Q16881|TRXR1_DROME; sp|Q16881-6|TRXR1_DROME; sp|Q16881-5|TRXR1_DROME; sp|Q16881-4|TRXR1_DROME; sp|Q16881-3|TRXR1_DROME; sp|Q16881-2|TRXR1_DROME	Thioredoxin reductase 1, cytoplasmic OS=Homo sapiens GN=TXNRD1 PE=1 SV=3; Isoform 6 of Thioredoxin reductase 1, cytoplasmic OS=Homo sapiens GN=TXNRD1; Isoform 5 of Thioredoxin reductase 1, cytoplasmic OS=Homo sapiens GN=TXNRD1; Isoform 4 of Thioredoxin reductase 1, cytoplasmic OS=Homo sapiens GN=TXNRD1; Isoform 3 of Thioredoxin reductase 1, cytoplasmic OS=Homo sapiens GN=TXNRD1; Isoform 2 of Thio…	0	99	GLGGTCVNVGCIPK	Carbamidomethyl(C)@6; Carbamidomethyl(C)@11		cleaved W-G@N-term	0.000494943	1430.7	716.358	1430.7	716.358	2	20	1.1.1.2274.20	33.9888	14399.8	13774.5	34	0.2	3639.5
1	sp|Q16881|TRXR1_DROME; sp|Q16881-6|TRXR1_DROME; sp|Q16881-5|TRXR1_DROME; sp|Q16881-4|TRXR1_DROME; sp|Q16881-3|TRXR1_DROME; sp|Q16881-2|TRXR1_DROME	Thioredoxin reductase 1, cytoplasmic OS=Homo sapiens GN=TXNRD1 PE=1 SV=3; Isoform 6 of Thioredoxin reductase 1, cytoplasmic OS=Homo sapiens GN=TXNRD1; Isoform 5 of Thioredoxin reductase 1, cytoplasmic OS=Homo sapiens GN=TXNRD1; Isoform 4 of Thioredoxin reductase 1, cytoplasmic OS=Homo sapiens GN=TXNRD1; Isoform 3 of Thioredoxin reductase 1, cytoplasmic OS=Homo sapiens GN=TXNRD1; Isoform 2 of Thio…	0	99	HSYFWPLEW			cleaved Y-H@N-term; cleaved W-T@C-term	-0.00142333	1263.57	632.792	1263.57	632.793	2	12	1.1.1.2532.4	46.6345	91873.5	91625.4	46.63	0.15	11579.4
1	sp|Q16881|TRXR1_DROME; sp|Q16881-6|TRXR1_DROME; sp|Q16881-5|TRXR1_DROME; sp|Q16881-4|TRXR1_DROME; sp|Q16881-3|TRXR1_DROME; sp|Q16881-2|TRXR1_DROME	Thioredoxin reductase 1, cytoplasmic OS=Homo sapiens GN=TXNRD1 PE=1 SV=3; Isoform 6 of Thioredoxin reductase 1, cytoplasmic OS=Homo sapiens GN=TXNRD1; Isoform 5 of Thioredoxin reductase 1, cytoplasmic OS=Homo sapiens GN=TXNRD1; Isoform 4 of Thioredoxin reductase 1, cytoplasmic OS=Homo sapiens GN=TXNRD1; Isoform 3 of Thioredoxin reductase 1, cytoplasmic OS=Homo sapiens GN=TXNRD1; Isoform 2 of Thio…	0	99	HSYFWPLEW			cleaved Y-H@N-term; cleaved W-T@C-term	-0.00142333	1263.57	632.792	1263.57	632.793	2	12	1.1.1.2534.4	46.7368	91873.5	52977.8	46.63	0.15	5174.76
1	sp|Q16881|TRXR1_DROME; sp|Q16881-6|TRXR1_DROME; sp|Q16881-5|TRXR1_DROME; sp|Q16881-4|TRXR1_DROME; sp|Q16881-3|TRXR1_DROME; sp|Q16881-2|TRXR1_DROME	Thioredoxin reductase 1, cytoplasmic OS=Homo sapiens GN=TXNRD1 PE=1 SV=3; Isoform 6 of Thioredoxin reductase 1, cytoplasmic OS=Homo sapiens GN=TXNRD1; Isoform 5 of Thioredoxin reductase 1, cytoplasmic OS=Homo sapiens GN=TXNRD1; Isoform 4 of Thioredoxin reductase 1, cytoplasmic OS=Homo sapiens GN=TXNRD1; Isoform 3 of Thioredoxin reductase 1, cytoplasmic OS=Homo sapiens GN=TXNRD1; Isoform 2 of Thio…	0	99	HSYFWPLEW			cleaved Y-H@N-term; cleaved W-T@C-term	-0.00142333	1263.57	632.792	1263.57	632.793	2	11	1.1.1.2535.6	46.7863	91873.5	25924.3	46.63	0.15	2139.88
1	sp|Q16881|TRXR1_DROME; sp|Q16881-6|TRXR1_DROME; sp|Q16881-5|TRXR1_DROME; sp|Q16881-4|TRXR1_DROME; sp|Q16881-3|TRXR1_DROME; sp|Q16881-2|TRXR1_DROME	Thioredoxin reductase 1, cytoplasmic OS=Homo sapiens GN=TXNRD1 PE=1 SV=3; Isoform 6 of Thioredoxin reductase 1, cytoplasmic OS=Homo sapiens GN=TXNRD1; Isoform 5 of Thioredoxin reductase 1, cytoplasmic OS=Homo sapiens GN=TXNRD1; Isoform 4 of Thioredoxin reductase 1, cytoplasmic OS=Homo sapiens GN=TXNRD1; Isoform 3 of Thioredoxin reductase 1, cytoplasmic OS=Homo sapiens GN=TXNRD1; Isoform 2 of Thio…	0	99	HVLGPNAGEVTQGF			cleaved F-H@N-term; cleaved F-A@C-term	-0.00149774	1424.7	713.359	1424.7	713.36	2	22	1.1.1.2286.20	34.5826	97711	90881.8	34.6	0.15	16614.3
1	sp|Q16881|TRXR1_DROME; sp|Q16881-6|TRXR1_DROME; sp|Q16881-5|TRXR1_DROME; sp|Q16881-4|TRXR1_DROME; sp|Q16881-3|TRXR1_DROME; sp|Q16881-2|TRXR1_DROME	Thioredoxin reductase 1, cytoplasmic OS=Homo sapiens GN=TXNRD1 PE=1 SV=3; Isoform 6 of Thioredoxin reductase 1, cytoplasmic OS=Homo sapiens GN=TXNRD1; Isoform 5 of Thioredoxin reductase 1, cytoplasmic OS=Homo sapiens GN=TXNRD1; Isoform 4 of Thioredoxin reductase 1, cytoplasmic OS=Homo sapiens GN=TXNRD1; Isoform 3 of Thioredoxin reductase 1, cytoplasmic OS=Homo sapiens GN=TXNRD1; Isoform 2 of Thio…	0	99	HVLGPNAGEVTQGF			cleaved F-H@N-term; cleaved F-A@C-term	-0.00149774	1424.7	713.359	1424.7	713.36	2	21	1.1.1.2287.18	34.6252	97711	95956.7	34.6	0.15	17610.6
1	sp|Q16881|TRXR1_DROME; sp|Q16881-6|TRXR1_DROME; sp|Q16881-5|TRXR1_DROME; sp|Q16881-4|TRXR1_DROME; sp|Q16881-3|TRXR1_DROME; sp|Q16881-2|TRXR1_DROME	Thioredoxin reductase 1, cytoplasmic OS=Homo sapiens GN=TXNRD1 PE=1 SV=3; Isoform 6 of Thioredoxin reductase 1, cytoplasmic OS=Homo sapiens GN=TXNRD1; Isoform 5 of Thioredoxin reductase 1, cytoplasmic OS=Homo sapiens GN=TXNRD1; Isoform 4 of Thioredoxin reductase 1, cytoplasmic OS=Homo sapiens GN=TXNRD1; Isoform 3 of Thioredoxin reductase 1, cytoplasmic OS=Homo sapiens GN=TXNRD1; Isoform 2 of Thio…	0	99	HVLGPNAGEVTQGF			cleaved F-H@N-term; cleaved F-A@C-term	-0.00149774	1424.7	713.359	1424.7	713.36	2	16	1.1.1.2289.21	34.7291	97711	35000.7	34.6	0.15	4129.32
1	sp|Q16881|TRXR1_DROME; sp|Q16881-6|TRXR1_DROME; sp|Q16881-5|TRXR1_DROME; sp|Q16881-4|TRXR1_DROME; sp|Q16881-3|TRXR1_DROME; sp|Q16881-2|TRXR1_DROME	Thioredoxin reductase 1, cytoplasmic OS=Homo sapiens GN=TXNRD1 PE=1 SV=3; Isoform 6 of Thioredoxin reductase 1, cytoplasmic OS=Homo sapiens GN=TXNRD1; Isoform 5 of Thioredoxin reductase 1, cytoplasmic OS=Homo sapiens GN=TXNRD1; Isoform 4 of Thioredoxin reductase 1, cytoplasmic OS=Homo sapiens GN=TXNRD1; Isoform 3 of Thioredoxin reductase 1, cytoplasmic OS=Homo sapiens GN=TXNRD1; Isoform 2 of Thio…	0	99	HVLGPNAGEVTQGFAAALK			cleaved F-H@N-term	-0.00082977	1878.99	940.505	1879	940.505	2	28	1.1.1.2413.19	40.7969	68651.6	54417.8	40.86	0.2	7041.94
1	sp|Q16881|TRXR1_DROME; sp|Q16881-6|TRXR1_DROME; sp|Q16881-5|TRXR1_DROME; sp|Q16881-4|TRXR1_DROME; sp|Q16881-3|TRXR1_DROME; sp|Q16881-2|TRXR1_DROME	Thioredoxin reductase 1, cytoplasmic OS=Homo sapiens GN=TXNRD1 PE=1 SV=3; Isoform 6 of Thioredoxin reductase 1, cytoplasmic OS=Homo sapiens GN=TXNRD1; Isoform 5 of Thioredoxin reductase 1, cytoplasmic OS=Homo sapiens GN=TXNRD1; Isoform 4 of Thioredoxin reductase 1, cytoplasmic OS=Homo sapiens GN=TXNRD1; Isoform 3 of Thioredoxin reductase 1, cytoplasmic OS=Homo sapiens GN=TXNRD1; Isoform 2 of Thio…	0	99	HVLGPNAGEVTQGFAAALK			cleaved F-H@N-term	6.67787e-05	1879	627.339	1879	627.339	3	26	1.1.1.2414.7	40.8274	226880	205604	40.86	0.2	32089.6
1	sp|Q16881|TRXR1_DROME; sp|Q16881-6|TRXR1_DROME; sp|Q16881-5|TRXR1_DROME; sp|Q16881-4|TRXR1_DROME; sp|Q16881-3|TRXR1_DROME; sp|Q16881-2|TRXR1_DROME	Thioredoxin reductase 1, cytoplasmic OS=Homo sapiens GN=TXNRD1 PE=1 SV=3; Isoform 6 of Thioredoxin reductase 1, cytoplasmic OS=Homo sapiens GN=TXNRD1; Isoform 5 of Thioredoxin reductase 1, cytoplasmic OS=Homo sapiens GN=TXNRD1; Isoform 4 of Thioredoxin reductase 1, cytoplasmic OS=Homo sapiens GN=TXNRD1; Isoform 3 of Thioredoxin reductase 1, cytoplasmic OS=Homo sapiens GN=TXNRD1; Isoform 2 of Thio…	0	99	HVLGPNAGEVTQGFAAALK			cleaved F-H@N-term	-0.00082977	1878.99	940.505	1879	940.505	2	28	1.1.1.2415.14	40.8948	68651.6	66743.9	40.86	0.2	8080.22
1	sp|Q16881|TRXR1_DROME; sp|Q16881-6|TRXR1_DROME; sp|Q16881-5|TRXR1_DROME; sp|Q16881-4|TRXR1_DROME; sp|Q16881-3|TRXR1_DROME; sp|Q16881-2|TRXR1_DROME	Thioredoxin reductase 1, cytoplasmic OS=Homo sapiens GN=TXNRD1 PE=1 SV=3; Isoform 6 of Thioredoxin reductase 1, cytoplasmic OS=Homo sapiens GN=TXNRD1; Isoform 5 of Thioredoxin reductase 1, cytoplasmic OS=Homo sapiens GN=TXNRD1; Isoform 4 of Thioredoxin reductase 1, cytoplasmic OS=Homo sapiens GN=TXNRD1; Isoform 3 of Thioredoxin reductase 1, cytoplasmic OS=Homo sapiens GN=TXNRD1; Isoform 2 of Thio…	0	99	HVLGPNAGEVTQGFAAALK			cleaved F-H@N-term	-0.00082977	1878.99	940.505	1879	940.505	2	28	1.1.1.2416.14	40.9471	68651.6	53105.3	40.86	0.2	7621.18
1	sp|Q16881|TRXR1_DROME; sp|Q16881-6|TRXR1_DROME; sp|Q16881-5|TRXR1_DROME; sp|Q16881-4|TRXR1_DROME; sp|Q16881-3|TRXR1_DROME; sp|Q16881-2|TRXR1_DROME	Thioredoxin reductase 1, cytoplasmic OS=Homo sapiens GN=TXNRD1 PE=1 SV=3; Isoform 6 of Thioredoxin reductase 1, cytoplasmic OS=Homo sapiens GN=TXNRD1; Isoform 5 of Thioredoxin reductase 1, cytoplasmic OS=Homo sapiens GN=TXNRD1; Isoform 4 of Thioredoxin reductase 1, cytoplasmic OS=Homo sapiens GN=TXNRD1; Isoform 3 of Thioredoxin reductase 1, cytoplasmic OS=Homo sapiens GN=TXNRD1; Isoform 2 of Thio…	0	99	HVLGPNAGEVTQGFAAALK			cleaved F-H@N-term	-0.00082977	1878.99	940.505	1879	940.505	2	26	1.1.1.2417.14	40.9964	68651.6	36083.6	40.86	0.2	6131.95
1	sp|Q16881|TRXR1_DROME; sp|Q16881-6|TRXR1_DROME; sp|Q16881-5|TRXR1_DROME; sp|Q16881-4|TRXR1_DROME; sp|Q16881-3|TRXR1_DROME; sp|Q16881-2|TRXR1_DROME	Thioredoxin reductase 1, cytoplasmic OS=Homo sapiens GN=TXNRD1 PE=1 SV=3; Isoform 6 of Thioredoxin reductase 1, cytoplasmic OS=Homo sapiens GN=TXNRD1; Isoform 5 of Thioredoxin reductase 1, cytoplasmic OS=Homo sapiens GN=TXNRD1; Isoform 4 of Thioredoxin reductase 1, cytoplasmic OS=Homo sapiens GN=TXNRD1; Isoform 3 of Thioredoxin reductase 1, cytoplasmic OS=Homo sapiens GN=TXNRD1; Isoform 2 of Thio…	0	99	HVLGPNAGEVTQGFAAALK			cleaved F-H@N-term	-0.00082977	1878.99	940.505	1879	940.505	2	26	1.1.1.2418.16	41.0389	68651.6	22317.4	40.86	0.2	4015.67
1	sp|Q16881|TRXR1_DROME; sp|Q16881-6|TRXR1_DROME; sp|Q16881-5|TRXR1_DROME; sp|Q16881-4|TRXR1_DROME; sp|Q16881-3|TRXR1_DROME; sp|Q16881-2|TRXR1_DROME	Thioredoxin reductase 1, cytoplasmic OS=Homo sapiens GN=TXNRD1 PE=1 SV=3; Isoform 6 of Thioredoxin reductase 1, cytoplasmic OS=Homo sapiens GN=TXNRD1; Isoform 5 of Thioredoxin reductase 1, cytoplasmic OS=Homo sapiens GN=TXNRD1; Isoform 4 of Thioredoxin reductase 1, cytoplasmic OS=Homo sapiens GN=TXNRD1; Isoform 3 of Thioredoxin reductase 1, cytoplasmic OS=Homo sapiens GN=TXNRD1; Isoform 2 of Thio…	0	99	HVLGPNAGEVTQGFAAALK	Deamidated(N)@6		cleaved F-H@N-term	0.00280676	1879.98	627.668	1879.98	627.667	3	19	1.1.1.2451.6	42.6362	7291.81	6600.17	42.62	0.1	2655.56
1	sp|Q16881|TRXR1_DROME; sp|Q16881-6|TRXR1_DROME; sp|Q16881-5|TRXR1_DROME; sp|Q16881-4|TRXR1_DROME; sp|Q16881-3|TRXR1_DROME; sp|Q16881-2|TRXR1_DROME	Thioredoxin reductase 1, cytoplasmic OS=Homo sapiens GN=TXNRD1 PE=1 SV=3; Isoform 6 of Thioredoxin reductase 1, cytoplasmic OS=Homo sapiens GN=TXNRD1; Isoform 5 of Thioredoxin reductase 1, cytoplasmic OS=Homo sapiens GN=TXNRD1; Isoform 4 of Thioredoxin reductase 1, cytoplasmic OS=Homo sapiens GN=TXNRD1; Isoform 3 of Thioredoxin reductase 1, cytoplasmic OS=Homo sapiens GN=TXNRD1; Isoform 2 of Thio…	0	99	HVLGPNAGEVTQGFAAALK			cleaved F-H@N-term	6.67787e-05	1879	627.339	1879	627.339	3	18	1.1.1.2417.7	40.9731	226880	151458	40.86	0.2	3284.98
1	sp|Q16881|TRXR1_DROME; sp|Q16881-6|TRXR1_DROME; sp|Q16881-5|TRXR1_DROME; sp|Q16881-4|TRXR1_DROME; sp|Q16881-3|TRXR1_DROME; sp|Q16881-2|TRXR1_DROME	Thioredoxin reductase 1, cytoplasmic OS=Homo sapiens GN=TXNRD1 PE=1 SV=3; Isoform 6 of Thioredoxin reductase 1, cytoplasmic OS=Homo sapiens GN=TXNRD1; Isoform 5 of Thioredoxin reductase 1, cytoplasmic OS=Homo sapiens GN=TXNRD1; Isoform 4 of Thioredoxin reductase 1, cytoplasmic OS=Homo sapiens GN=TXNRD1; Isoform 3 of Thioredoxin reductase 1, cytoplasmic OS=Homo sapiens GN=TXNRD1; Isoform 2 of Thio…	0	99	HVLGPNAGEVTQGFAAALK			cleaved F-H@N-term	6.67787e-05	1879	627.339	1879	627.339	3	24	1.1.1.2416.8	40.9271	226880	197671	40.86	0.2	24441.2
1	sp|Q16881|TRXR1_DROME; sp|Q16881-6|TRXR1_DROME; sp|Q16881-5|TRXR1_DROME; sp|Q16881-4|TRXR1_DROME; sp|Q16881-3|TRXR1_DROME; sp|Q16881-2|TRXR1_DROME	Thioredoxin reductase 1, cytoplasmic OS=Homo sapiens GN=TXNRD1 PE=1 SV=3; Isoform 6 of Thioredoxin reductase 1, cytoplasmic OS=Homo sapiens GN=TXNRD1; Isoform 5 of Thioredoxin reductase 1, cytoplasmic OS=Homo sapiens GN=TXNRD1; Isoform 4 of Thioredoxin reductase 1, cytoplasmic OS=Homo sapiens GN=TXNRD1; Isoform 3 of Thioredoxin reductase 1, cytoplasmic OS=Homo sapiens GN=TXNRD1; Isoform 2 of Thio…	0	99	HVLGPNAGEVTQGFAAALK			cleaved F-H@N-term	6.67787e-05	1879	627.339	1879	627.339	3	23	1.1.1.2414.8	40.8308	226880	208253	40.86	0.2	28050.3
1	sp|Q16881|TRXR1_DROME; sp|Q16881-6|TRXR1_DROME; sp|Q16881-5|TRXR1_DROME; sp|Q16881-4|TRXR1_DROME; sp|Q16881-3|TRXR1_DROME; sp|Q16881-2|TRXR1_DROME	Thioredoxin reductase 1, cytoplasmic OS=Homo sapiens GN=TXNRD1 PE=1 SV=3; Isoform 6 of Thioredoxin reductase 1, cytoplasmic OS=Homo sapiens GN=TXNRD1; Isoform 5 of Thioredoxin reductase 1, cytoplasmic OS=Homo sapiens GN=TXNRD1; Isoform 4 of Thioredoxin reductase 1, cytoplasmic OS=Homo sapiens GN=TXNRD1; Isoform 3 of Thioredoxin reductase 1, cytoplasmic OS=Homo sapiens GN=TXNRD1; Isoform 2 of Thio…	0	99	IPVTDEEQTNVPY			cleaved Y-I@C-term	1.57712e-05	1503.71	752.862	1503.71	752.862	2	14	1.1.1.2295.14	35.0294	366472	16886	34.69	0.2	1869.25
1	sp|Q16881|TRXR1_DROME; sp|Q16881-6|TRXR1_DROME; sp|Q16881-5|TRXR1_DROME; sp|Q16881-4|TRXR1_DROME; sp|Q16881-3|TRXR1_DROME; sp|Q16881-2|TRXR1_DROME	Thioredoxin reductase 1, cytoplasmic OS=Homo sapiens GN=TXNRD1 PE=1 SV=3; Isoform 6 of Thioredoxin reductase 1, cytoplasmic OS=Homo sapiens GN=TXNRD1; Isoform 5 of Thioredoxin reductase 1, cytoplasmic OS=Homo sapiens GN=TXNRD1; Isoform 4 of Thioredoxin reductase 1, cytoplasmic OS=Homo sapiens GN=TXNRD1; Isoform 3 of Thioredoxin reductase 1, cytoplasmic OS=Homo sapiens GN=TXNRD1; Isoform 2 of Thio…	0	99	IPVTDEEQTNVPY			cleaved Y-I@C-term	1.57712e-05	1503.71	752.862	1503.71	752.862	2	14	1.1.1.2293.20	34.9247	366472	65505.6	34.69	0.2	6906.52
1	sp|Q16881|TRXR1_DROME; sp|Q16881-6|TRXR1_DROME; sp|Q16881-5|TRXR1_DROME; sp|Q16881-4|TRXR1_DROME; sp|Q16881-3|TRXR1_DROME; sp|Q16881-2|TRXR1_DROME	Thioredoxin reductase 1, cytoplasmic OS=Homo sapiens GN=TXNRD1 PE=1 SV=3; Isoform 6 of Thioredoxin reductase 1, cytoplasmic OS=Homo sapiens GN=TXNRD1; Isoform 5 of Thioredoxin reductase 1, cytoplasmic OS=Homo sapiens GN=TXNRD1; Isoform 4 of Thioredoxin reductase 1, cytoplasmic OS=Homo sapiens GN=TXNRD1; Isoform 3 of Thioredoxin reductase 1, cytoplasmic OS=Homo sapiens GN=TXNRD1; Isoform 2 of Thio…	0	99	IPVTDEEQTNVPY	Cation:Na(E)@7		cleaved Y-I@C-term	0.0017156	1525.69	763.854	1525.69	763.853	2	12	1.1.1.2289.23	34.7324	12414.7	11156.6	34.69	0.25	2261.06
1	sp|Q16881|TRXR1_DROME; sp|Q16881-6|TRXR1_DROME; sp|Q16881-5|TRXR1_DROME; sp|Q16881-4|TRXR1_DROME; sp|Q16881-3|TRXR1_DROME; sp|Q16881-2|TRXR1_DROME	Thioredoxin reductase 1, cytoplasmic OS=Homo sapiens GN=TXNRD1 PE=1 SV=3; Isoform 6 of Thioredoxin reductase 1, cytoplasmic OS=Homo sapiens GN=TXNRD1; Isoform 5 of Thioredoxin reductase 1, cytoplasmic OS=Homo sapiens GN=TXNRD1; Isoform 4 of Thioredoxin reductase 1, cytoplasmic OS=Homo sapiens GN=TXNRD1; Isoform 3 of Thioredoxin reductase 1, cytoplasmic OS=Homo sapiens GN=TXNRD1; Isoform 2 of Thio…	0	99	IPVTDEEQTNVPY			cleaved Y-I@C-term	1.57712e-05	1503.71	752.862	1503.71	752.862	2	14	1.1.1.2294.7	34.9767	366472	34073.4	34.69	0.2	4074.03
1	sp|Q16881|TRXR1_DROME; sp|Q16881-6|TRXR1_DROME; sp|Q16881-5|TRXR1_DROME; sp|Q16881-4|TRXR1_DROME; sp|Q16881-3|TRXR1_DROME; sp|Q16881-2|TRXR1_DROME	Thioredoxin reductase 1, cytoplasmic OS=Homo sapiens GN=TXNRD1 PE=1 SV=3; Isoform 6 of Thioredoxin reductase 1, cytoplasmic OS=Homo sapiens GN=TXNRD1; Isoform 5 of Thioredoxin reductase 1, cytoplasmic OS=Homo sapiens GN=TXNRD1; Isoform 4 of Thioredoxin reductase 1, cytoplasmic OS=Homo sapiens GN=TXNRD1; Isoform 3 of Thioredoxin reductase 1, cytoplasmic OS=Homo sapiens GN=TXNRD1; Isoform 2 of Thio…	0	99	IPVTDEEQTNVPY	Cation:Na(E)@7		cleaved Y-I@C-term	0.0017156	1525.69	763.854	1525.69	763.853	2	11	1.1.1.2288.23	34.6829	12414.7	12058.5	34.69	0.25	2444.34
1	sp|Q16881|TRXR1_DROME; sp|Q16881-6|TRXR1_DROME; sp|Q16881-5|TRXR1_DROME; sp|Q16881-4|TRXR1_DROME; sp|Q16881-3|TRXR1_DROME; sp|Q16881-2|TRXR1_DROME	Thioredoxin reductase 1, cytoplasmic OS=Homo sapiens GN=TXNRD1 PE=1 SV=3; Isoform 6 of Thioredoxin reductase 1, cytoplasmic OS=Homo sapiens GN=TXNRD1; Isoform 5 of Thioredoxin reductase 1, cytoplasmic OS=Homo sapiens GN=TXNRD1; Isoform 4 of Thioredoxin reductase 1, cytoplasmic OS=Homo sapiens GN=TXNRD1; Isoform 3 of Thioredoxin reductase 1, cytoplasmic OS=Homo sapiens GN=TXNRD1; Isoform 2 of Thio…	0	99	IPVTDEEQTNVPY			cleaved Y-I@C-term	1.57712e-05	1503.71	752.862	1503.71	752.862	2	13	1.1.1.2291.22	34.8294	366472	177928	34.69	0.2	18123.1
1	sp|Q16881|TRXR1_DROME; sp|Q16881-6|TRXR1_DROME; sp|Q16881-5|TRXR1_DROME; sp|Q16881-4|TRXR1_DROME; sp|Q16881-3|TRXR1_DROME; sp|Q16881-2|TRXR1_DROME	Thioredoxin reductase 1, cytoplasmic OS=Homo sapiens GN=TXNRD1 PE=1 SV=3; Isoform 6 of Thioredoxin reductase 1, cytoplasmic OS=Homo sapiens GN=TXNRD1; Isoform 5 of Thioredoxin reductase 1, cytoplasmic OS=Homo sapiens GN=TXNRD1; Isoform 4 of Thioredoxin reductase 1, cytoplasmic OS=Homo sapiens GN=TXNRD1; Isoform 3 of Thioredoxin reductase 1, cytoplasmic OS=Homo sapiens GN=TXNRD1; Isoform 2 of Thio…	0	99	IPVTDEEQTNVPYIY			cleaved Y-A@C-term	0.00131792	1779.86	890.936	1779.86	890.936	2	17	1.1.1.2455.18	42.8542	180064	114104	42.78	0.15	11452.6
1	sp|Q16881|TRXR1_DROME; sp|Q16881-6|TRXR1_DROME; sp|Q16881-5|TRXR1_DROME; sp|Q16881-4|TRXR1_DROME; sp|Q16881-3|TRXR1_DROME; sp|Q16881-2|TRXR1_DROME	Thioredoxin reductase 1, cytoplasmic OS=Homo sapiens GN=TXNRD1 PE=1 SV=3; Isoform 6 of Thioredoxin reductase 1, cytoplasmic OS=Homo sapiens GN=TXNRD1; Isoform 5 of Thioredoxin reductase 1, cytoplasmic OS=Homo sapiens GN=TXNRD1; Isoform 4 of Thioredoxin reductase 1, cytoplasmic OS=Homo sapiens GN=TXNRD1; Isoform 3 of Thioredoxin reductase 1, cytoplasmic OS=Homo sapiens GN=TXNRD1; Isoform 2 of Thio…	0	99	IPVTDEEQTNVPYIY			cleaved Y-A@C-term	0.00131792	1779.86	890.936	1779.86	890.936	2	16	1.1.1.2456.19	42.905	180064	57023.9	42.78	0.15	5794.95
1	sp|Q16881|TRXR1_DROME; sp|Q16881-6|TRXR1_DROME; sp|Q16881-5|TRXR1_DROME; sp|Q16881-4|TRXR1_DROME; sp|Q16881-3|TRXR1_DROME; sp|Q16881-2|TRXR1_DROME	Thioredoxin reductase 1, cytoplasmic OS=Homo sapiens GN=TXNRD1 PE=1 SV=3; Isoform 6 of Thioredoxin reductase 1, cytoplasmic OS=Homo sapiens GN=TXNRD1; Isoform 5 of Thioredoxin reductase 1, cytoplasmic OS=Homo sapiens GN=TXNRD1; Isoform 4 of Thioredoxin reductase 1, cytoplasmic OS=Homo sapiens GN=TXNRD1; Isoform 3 of Thioredoxin reductase 1, cytoplasmic OS=Homo sapiens GN=TXNRD1; Isoform 2 of Thio…	0	99	IPVTDEEQTNVPYIY			cleaved Y-A@C-term	0.00131792	1779.86	890.936	1779.86	890.936	2	16	1.1.1.2452.17	42.704	180064	109478	42.78	0.15	12635.9
1	sp|Q16881|TRXR1_DROME; sp|Q16881-6|TRXR1_DROME; sp|Q16881-5|TRXR1_DROME; sp|Q16881-4|TRXR1_DROME; sp|Q16881-3|TRXR1_DROME; sp|Q16881-2|TRXR1_DROME	Thioredoxin reductase 1, cytoplasmic OS=Homo sapiens GN=TXNRD1 PE=1 SV=3; Isoform 6 of Thioredoxin reductase 1, cytoplasmic OS=Homo sapiens GN=TXNRD1; Isoform 5 of Thioredoxin reductase 1, cytoplasmic OS=Homo sapiens GN=TXNRD1; Isoform 4 of Thioredoxin reductase 1, cytoplasmic OS=Homo sapiens GN=TXNRD1; Isoform 3 of Thioredoxin reductase 1, cytoplasmic OS=Homo sapiens GN=TXNRD1; Isoform 2 of Thio…	0	99	IPVTDEEQTNVPYIY			cleaved Y-A@C-term	0.00131792	1779.86	890.936	1779.86	890.936	2	17	1.1.1.2453.21	42.7602	180064	169208	42.78	0.15	22754.4
1	sp|Q16881|TRXR1_DROME; sp|Q16881-6|TRXR1_DROME; sp|Q16881-5|TRXR1_DROME; sp|Q16881-4|TRXR1_DROME; sp|Q16881-3|TRXR1_DROME; sp|Q16881-2|TRXR1_DROME	Thioredoxin reductase 1, cytoplasmic OS=Homo sapiens GN=TXNRD1 PE=1 SV=3; Isoform 6 of Thioredoxin reductase 1, cytoplasmic OS=Homo sapiens GN=TXNRD1; Isoform 5 of Thioredoxin reductase 1, cytoplasmic OS=Homo sapiens GN=TXNRD1; Isoform 4 of Thioredoxin reductase 1, cytoplasmic OS=Homo sapiens GN=TXNRD1; Isoform 3 of Thioredoxin reductase 1, cytoplasmic OS=Homo sapiens GN=TXNRD1; Isoform 2 of Thio…	0	99	IPVTDEEQTNVPYIY			cleaved Y-A@C-term	0.00131792	1779.86	890.936	1779.86	890.936	2	17	1.1.1.2454.21	42.8097	180064	161989	42.78	0.15	19891.1
1	sp|Q16881|TRXR1_DROME; sp|Q16881-6|TRXR1_DROME; sp|Q16881-5|TRXR1_DROME; sp|Q16881-4|TRXR1_DROME; sp|Q16881-3|TRXR1_DROME; sp|Q16881-2|TRXR1_DROME	Thioredoxin reductase 1, cytoplasmic OS=Homo sapiens GN=TXNRD1 PE=1 SV=3; Isoform 6 of Thioredoxin reductase 1, cytoplasmic OS=Homo sapiens GN=TXNRD1; Isoform 5 of Thioredoxin reductase 1, cytoplasmic OS=Homo sapiens GN=TXNRD1; Isoform 4 of Thioredoxin reductase 1, cytoplasmic OS=Homo sapiens GN=TXNRD1; Isoform 3 of Thioredoxin reductase 1, cytoplasmic OS=Homo sapiens GN=TXNRD1; Isoform 2 of Thio…	0	99	IYAIGDILEDKVELTPVAIQ			cleaved Y-I@N-term; cleaved Q-A@C-term; missed K-V@11	-0.00086926	2199.2	734.075	2199.2	734.075	3	18	1.1.1.2522.13	46.1588	87723.1	75303.4	46.19	0.1	12929.1
1	sp|Q16881|TRXR1_DROME; sp|Q16881-6|TRXR1_DROME; sp|Q16881-5|TRXR1_DROME; sp|Q16881-4|TRXR1_DROME; sp|Q16881-3|TRXR1_DROME; sp|Q16881-2|TRXR1_DROME	Thioredoxin reductase 1, cytoplasmic OS=Homo sapiens GN=TXNRD1 PE=1 SV=3; Isoform 6 of Thioredoxin reductase 1, cytoplasmic OS=Homo sapiens GN=TXNRD1; Isoform 5 of Thioredoxin reductase 1, cytoplasmic OS=Homo sapiens GN=TXNRD1; Isoform 4 of Thioredoxin reductase 1, cytoplasmic OS=Homo sapiens GN=TXNRD1; Isoform 3 of Thioredoxin reductase 1, cytoplasmic OS=Homo sapiens GN=TXNRD1; Isoform 2 of Thio…	0	99	IYAIGDILEDKVELTPVAIQ			cleaved Y-I@N-term; cleaved Q-A@C-term; missed K-V@11	-0.00086926	2199.2	734.075	2199.2	734.075	3	18	1.1.1.2523.7	46.2047	87723.1	87377.6	46.19	0.1	14008.1
1	sp|Q16881|TRXR1_DROME; sp|Q16881-6|TRXR1_DROME; sp|Q16881-5|TRXR1_DROME; sp|Q16881-4|TRXR1_DROME; sp|Q16881-3|TRXR1_DROME; sp|Q16881-2|TRXR1_DROME	Thioredoxin reductase 1, cytoplasmic OS=Homo sapiens GN=TXNRD1 PE=1 SV=3; Isoform 6 of Thioredoxin reductase 1, cytoplasmic OS=Homo sapiens GN=TXNRD1; Isoform 5 of Thioredoxin reductase 1, cytoplasmic OS=Homo sapiens GN=TXNRD1; Isoform 4 of Thioredoxin reductase 1, cytoplasmic OS=Homo sapiens GN=TXNRD1; Isoform 3 of Thioredoxin reductase 1, cytoplasmic OS=Homo sapiens GN=TXNRD1; Isoform 2 of Thio…	0	99	IYAIGDILEDKVELTPVAIQAGR			cleaved Y-I@N-term; missed K-V@11	-0.00282172	2483.36	828.794	2483.36	828.795	3	27	1.1.1.2499.13	45.0196	308882	234334	45.09	0.15	57321.7
1	sp|Q16881|TRXR1_DROME; sp|Q16881-6|TRXR1_DROME; sp|Q16881-5|TRXR1_DROME; sp|Q16881-4|TRXR1_DROME; sp|Q16881-3|TRXR1_DROME; sp|Q16881-2|TRXR1_DROME	Thioredoxin reductase 1, cytoplasmic OS=Homo sapiens GN=TXNRD1 PE=1 SV=3; Isoform 6 of Thioredoxin reductase 1, cytoplasmic OS=Homo sapiens GN=TXNRD1; Isoform 5 of Thioredoxin reductase 1, cytoplasmic OS=Homo sapiens GN=TXNRD1; Isoform 4 of Thioredoxin reductase 1, cytoplasmic OS=Homo sapiens GN=TXNRD1; Isoform 3 of Thioredoxin reductase 1, cytoplasmic OS=Homo sapiens GN=TXNRD1; Isoform 2 of Thio…	0	99	IYAIGDILEDKVELTPVAIQAGR			cleaved Y-I@N-term; missed K-V@11	-0.00282172	2483.36	828.794	2483.36	828.795	3	27	1.1.1.2500.19	45.0787	308882	306072	45.09	0.15	78015.1
1	sp|Q16881|TRXR1_DROME; sp|Q16881-6|TRXR1_DROME; sp|Q16881-5|TRXR1_DROME; sp|Q16881-4|TRXR1_DROME; sp|Q16881-3|TRXR1_DROME; sp|Q16881-2|TRXR1_DROME	Thioredoxin reductase 1, cytoplasmic OS=Homo sapiens GN=TXNRD1 PE=1 SV=3; Isoform 6 of Thioredoxin reductase 1, cytoplasmic OS=Homo sapiens GN=TXNRD1; Isoform 5 of Thioredoxin reductase 1, cytoplasmic OS=Homo sapiens GN=TXNRD1; Isoform 4 of Thioredoxin reductase 1, cytoplasmic OS=Homo sapiens GN=TXNRD1; Isoform 3 of Thioredoxin reductase 1, cytoplasmic OS=Homo sapiens GN=TXNRD1; Isoform 2 of Thio…	0	99	IYAIGDILEDKVELTPVAIQAGR			cleaved Y-I@N-term; missed K-V@11	0.00185811	2483.37	621.849	2483.36	621.848	4	10	1.1.1.2501.7	45.108	127537	108898	45.05	0.1	941.517
1	sp|Q16881|TRXR1_DROME; sp|Q16881-6|TRXR1_DROME; sp|Q16881-5|TRXR1_DROME; sp|Q16881-4|TRXR1_DROME; sp|Q16881-3|TRXR1_DROME; sp|Q16881-2|TRXR1_DROME	Thioredoxin reductase 1, cytoplasmic OS=Homo sapiens GN=TXNRD1 PE=1 SV=3; Isoform 6 of Thioredoxin reductase 1, cytoplasmic OS=Homo sapiens GN=TXNRD1; Isoform 5 of Thioredoxin reductase 1, cytoplasmic OS=Homo sapiens GN=TXNRD1; Isoform 4 of Thioredoxin reductase 1, cytoplasmic OS=Homo sapiens GN=TXNRD1; Isoform 3 of Thioredoxin reductase 1, cytoplasmic OS=Homo sapiens GN=TXNRD1; Isoform 2 of Thio…	0	99	IYAIGDILEDKVELTPVAIQAGR			cleaved Y-I@N-term; missed K-V@11	-0.00282172	2483.36	828.794	2483.36	828.795	3	25	1.1.1.2501.18	45.1264	308882	230702	45.09	0.15	22841.5
1	sp|Q16881|TRXR1_DROME; sp|Q16881-6|TRXR1_DROME; sp|Q16881-5|TRXR1_DROME; sp|Q16881-4|TRXR1_DROME; sp|Q16881-3|TRXR1_DROME; sp|Q16881-2|TRXR1_DROME	Thioredoxin reductase 1, cytoplasmic OS=Homo sapiens GN=TXNRD1 PE=1 SV=3; Isoform 6 of Thioredoxin reductase 1, cytoplasmic OS=Homo sapiens GN=TXNRD1; Isoform 5 of Thioredoxin reductase 1, cytoplasmic OS=Homo sapiens GN=TXNRD1; Isoform 4 of Thioredoxin reductase 1, cytoplasmic OS=Homo sapiens GN=TXNRD1; Isoform 3 of Thioredoxin reductase 1, cytoplasmic OS=Homo sapiens GN=TXNRD1; Isoform 2 of Thio…	0	99	IYAIGDILEDKVELTPVAIQAGR			cleaved Y-I@N-term; missed K-V@11	-0.00282172	2483.36	828.794	2483.36	828.795	3	25	1.1.1.2502.9	45.169	308882	129441	45.09	0.15	10659.2
1	sp|Q16881|TRXR1_DROME; sp|Q16881-6|TRXR1_DROME; sp|Q16881-5|TRXR1_DROME; sp|Q16881-4|TRXR1_DROME; sp|Q16881-3|TRXR1_DROME; sp|Q16881-2|TRXR1_DROME	Thioredoxin reductase 1, cytoplasmic OS=Homo sapiens GN=TXNRD1 PE=1 SV=3; Isoform 6 of Thioredoxin reductase 1, cytoplasmic OS=Homo sapiens GN=TXNRD1; Isoform 5 of Thioredoxin reductase 1, cytoplasmic OS=Homo sapiens GN=TXNRD1; Isoform 4 of Thioredoxin reductase 1, cytoplasmic OS=Homo sapiens GN=TXNRD1; Isoform 3 of Thioredoxin reductase 1, cytoplasmic OS=Homo sapiens GN=TXNRD1; Isoform 2 of Thio…	0	99	IYAIGDILEDKVELTPVAIQAGR			cleaved Y-I@N-term; missed K-V@11	-0.00282172	2483.36	828.794	2483.36	828.795	3	25	1.1.1.2503.9	45.2116	308882	62588	45.09	0.15	7112.04
1	sp|Q16881|TRXR1_DROME; sp|Q16881-6|TRXR1_DROME; sp|Q16881-5|TRXR1_DROME; sp|Q16881-4|TRXR1_DROME; sp|Q16881-3|TRXR1_DROME; sp|Q16881-2|TRXR1_DROME	Thioredoxin reductase 1, cytoplasmic OS=Homo sapiens GN=TXNRD1 PE=1 SV=3; Isoform 6 of Thioredoxin reductase 1, cytoplasmic OS=Homo sapiens GN=TXNRD1; Isoform 5 of Thioredoxin reductase 1, cytoplasmic OS=Homo sapiens GN=TXNRD1; Isoform 4 of Thioredoxin reductase 1, cytoplasmic OS=Homo sapiens GN=TXNRD1; Isoform 3 of Thioredoxin reductase 1, cytoplasmic OS=Homo sapiens GN=TXNRD1; Isoform 2 of Thio…	0	99	IYAIGDILEDKVELTPVAIQAGR			cleaved Y-I@N-term; missed K-V@11	-0.00282172	2483.36	828.794	2483.36	828.795	3	20	1.1.1.2505.8	45.3069	308882	25984.8	45.09	0.15	3440.9
1	sp|Q16881|TRXR1_DROME; sp|Q16881-6|TRXR1_DROME; sp|Q16881-5|TRXR1_DROME; sp|Q16881-4|TRXR1_DROME; sp|Q16881-3|TRXR1_DROME; sp|Q16881-2|TRXR1_DROME	Thioredoxin reductase 1, cytoplasmic OS=Homo sapiens GN=TXNRD1 PE=1 SV=3; Isoform 6 of Thioredoxin reductase 1, cytoplasmic OS=Homo sapiens GN=TXNRD1; Isoform 5 of Thioredoxin reductase 1, cytoplasmic OS=Homo sapiens GN=TXNRD1; Isoform 4 of Thioredoxin reductase 1, cytoplasmic OS=Homo sapiens GN=TXNRD1; Isoform 3 of Thioredoxin reductase 1, cytoplasmic OS=Homo sapiens GN=TXNRD1; Isoform 2 of Thio…	0	99	IYAIGDILEDKVELTPVAIQAGR			cleaved Y-I@N-term; missed K-V@11	-0.00282172	2483.36	828.794	2483.36	828.795	3	15	1.1.1.2507.12	45.4124	308882	16500.5	45.09	0.15	2137.48
1	sp|Q16881|TRXR1_DROME; sp|Q16881-6|TRXR1_DROME; sp|Q16881-5|TRXR1_DROME; sp|Q16881-4|TRXR1_DROME; sp|Q16881-3|TRXR1_DROME; sp|Q16881-2|TRXR1_DROME	Thioredoxin reductase 1, cytoplasmic OS=Homo sapiens GN=TXNRD1 PE=1 SV=3; Isoform 6 of Thioredoxin reductase 1, cytoplasmic OS=Homo sapiens GN=TXNRD1; Isoform 5 of Thioredoxin reductase 1, cytoplasmic OS=Homo sapiens GN=TXNRD1; Isoform 4 of Thioredoxin reductase 1, cytoplasmic OS=Homo sapiens GN=TXNRD1; Isoform 3 of Thioredoxin reductase 1, cytoplasmic OS=Homo sapiens GN=TXNRD1; Isoform 2 of Thio…	0	99	IYAIGDILEDKVELTPVAIQAGR	Lys->Allysine(K)@11	Lys->Allysine(K)@489	cleaved Y-I@N-term; missed K-V@11	0.0336365	2482.37	828.462	2482.33	828.451	3	13	1.1.1.2522.17	46.1722	4820.29	1913.07	46.08	0.1	1406.5
1	sp|Q16881|TRXR1_DROME; sp|Q16881-6|TRXR1_DROME; sp|Q16881-5|TRXR1_DROME; sp|Q16881-4|TRXR1_DROME; sp|Q16881-3|TRXR1_DROME; sp|Q16881-2|TRXR1_DROME	Thioredoxin reductase 1, cytoplasmic OS=Homo sapiens GN=TXNRD1 PE=1 SV=3; Isoform 6 of Thioredoxin reductase 1, cytoplasmic OS=Homo sapiens GN=TXNRD1; Isoform 5 of Thioredoxin reductase 1, cytoplasmic OS=Homo sapiens GN=TXNRD1; Isoform 4 of Thioredoxin reductase 1, cytoplasmic OS=Homo sapiens GN=TXNRD1; Isoform 3 of Thioredoxin reductase 1, cytoplasmic OS=Homo sapiens GN=TXNRD1; Isoform 2 of Thio…	0	99	IYAIGDILEDKVELTPVAIQAGR	Formyl@N-term		cleaved Y-I@N-term; missed K-V@11	0.0017824	2511.36	838.127	2511.36	838.127	3	13	1.1.1.2562.14	48.1376	1740.13	1354.42	48.07	0.1	558.898
1	sp|Q16881|TRXR1_DROME; sp|Q16881-6|TRXR1_DROME; sp|Q16881-5|TRXR1_DROME; sp|Q16881-4|TRXR1_DROME; sp|Q16881-3|TRXR1_DROME; sp|Q16881-2|TRXR1_DROME	Thioredoxin reductase 1, cytoplasmic OS=Homo sapiens GN=TXNRD1 PE=1 SV=3; Isoform 6 of Thioredoxin reductase 1, cytoplasmic OS=Homo sapiens GN=TXNRD1; Isoform 5 of Thioredoxin reductase 1, cytoplasmic OS=Homo sapiens GN=TXNRD1; Isoform 4 of Thioredoxin reductase 1, cytoplasmic OS=Homo sapiens GN=TXNRD1; Isoform 3 of Thioredoxin reductase 1, cytoplasmic OS=Homo sapiens GN=TXNRD1; Isoform 2 of Thio…	0	99	KIGLETVGVK			missed K-I@1	0.000373447	1042.64	522.327	1042.64	522.327	2	17	1.1.1.2090.13	24.912	282553	108478	25.08	0.25	15481.6
1	sp|Q16881|TRXR1_DROME; sp|Q16881-6|TRXR1_DROME; sp|Q16881-5|TRXR1_DROME; sp|Q16881-4|TRXR1_DROME; sp|Q16881-3|TRXR1_DROME; sp|Q16881-2|TRXR1_DROME	Thioredoxin reductase 1, cytoplasmic OS=Homo sapiens GN=TXNRD1 PE=1 SV=3; Isoform 6 of Thioredoxin reductase 1, cytoplasmic OS=Homo sapiens GN=TXNRD1; Isoform 5 of Thioredoxin reductase 1, cytoplasmic OS=Homo sapiens GN=TXNRD1; Isoform 4 of Thioredoxin reductase 1, cytoplasmic OS=Homo sapiens GN=TXNRD1; Isoform 3 of Thioredoxin reductase 1, cytoplasmic OS=Homo sapiens GN=TXNRD1; Isoform 2 of Thio…	0	99	KIGLETVGVK			missed K-I@1	0.000373447	1042.64	522.327	1042.64	522.327	2	17	1.1.1.2091.15	24.9645	282553	198077	25.08	0.25	47993
1	sp|Q16881|TRXR1_DROME; sp|Q16881-6|TRXR1_DROME; sp|Q16881-5|TRXR1_DROME; sp|Q16881-4|TRXR1_DROME; sp|Q16881-3|TRXR1_DROME; sp|Q16881-2|TRXR1_DROME	Thioredoxin reductase 1, cytoplasmic OS=Homo sapiens GN=TXNRD1 PE=1 SV=3; Isoform 6 of Thioredoxin reductase 1, cytoplasmic OS=Homo sapiens GN=TXNRD1; Isoform 5 of Thioredoxin reductase 1, cytoplasmic OS=Homo sapiens GN=TXNRD1; Isoform 4 of Thioredoxin reductase 1, cytoplasmic OS=Homo sapiens GN=TXNRD1; Isoform 3 of Thioredoxin reductase 1, cytoplasmic OS=Homo sapiens GN=TXNRD1; Isoform 2 of Thio…	0	99	KIGLETVGVK			missed K-I@1	0.000373447	1042.64	522.327	1042.64	522.327	2	17	1.1.1.2094.12	25.1067	282553	262911	25.08	0.25	47430.5
1	sp|Q16881|TRXR1_DROME; sp|Q16881-6|TRXR1_DROME; sp|Q16881-5|TRXR1_DROME; sp|Q16881-4|TRXR1_DROME; sp|Q16881-3|TRXR1_DROME; sp|Q16881-2|TRXR1_DROME	Thioredoxin reductase 1, cytoplasmic OS=Homo sapiens GN=TXNRD1 PE=1 SV=3; Isoform 6 of Thioredoxin reductase 1, cytoplasmic OS=Homo sapiens GN=TXNRD1; Isoform 5 of Thioredoxin reductase 1, cytoplasmic OS=Homo sapiens GN=TXNRD1; Isoform 4 of Thioredoxin reductase 1, cytoplasmic OS=Homo sapiens GN=TXNRD1; Isoform 3 of Thioredoxin reductase 1, cytoplasmic OS=Homo sapiens GN=TXNRD1; Isoform 2 of Thio…	0	99	KIGLETVGVK			missed K-I@1	0.000373447	1042.64	522.327	1042.64	522.327	2	17	1.1.1.2095.14	25.1592	282553	202886	25.08	0.25	38515.5
1	sp|Q16881|TRXR1_DROME; sp|Q16881-6|TRXR1_DROME; sp|Q16881-5|TRXR1_DROME; sp|Q16881-4|TRXR1_DROME; sp|Q16881-3|TRXR1_DROME; sp|Q16881-2|TRXR1_DROME	Thioredoxin reductase 1, cytoplasmic OS=Homo sapiens GN=TXNRD1 PE=1 SV=3; Isoform 6 of Thioredoxin reductase 1, cytoplasmic OS=Homo sapiens GN=TXNRD1; Isoform 5 of Thioredoxin reductase 1, cytoplasmic OS=Homo sapiens GN=TXNRD1; Isoform 4 of Thioredoxin reductase 1, cytoplasmic OS=Homo sapiens GN=TXNRD1; Isoform 3 of Thioredoxin reductase 1, cytoplasmic OS=Homo sapiens GN=TXNRD1; Isoform 2 of Thio…	0	99	KIGLETVGVK			missed K-I@1	0.000373447	1042.64	522.327	1042.64	522.327	2	17	1.1.1.2096.5	25.2	282553	145925	25.08	0.25	27388.4
1	sp|Q16881|TRXR1_DROME; sp|Q16881-6|TRXR1_DROME; sp|Q16881-5|TRXR1_DROME; sp|Q16881-4|TRXR1_DROME; sp|Q16881-3|TRXR1_DROME; sp|Q16881-2|TRXR1_DROME	Thioredoxin reductase 1, cytoplasmic OS=Homo sapiens GN=TXNRD1 PE=1 SV=3; Isoform 6 of Thioredoxin reductase 1, cytoplasmic OS=Homo sapiens GN=TXNRD1; Isoform 5 of Thioredoxin reductase 1, cytoplasmic OS=Homo sapiens GN=TXNRD1; Isoform 4 of Thioredoxin reductase 1, cytoplasmic OS=Homo sapiens GN=TXNRD1; Isoform 3 of Thioredoxin reductase 1, cytoplasmic OS=Homo sapiens GN=TXNRD1; Isoform 2 of Thio…	0	99	KIGLETVGVK			missed K-I@1	0.000373447	1042.64	522.327	1042.64	522.327	2	17	1.1.1.2098.4	25.3	282553	50587.8	25.08	0.25	8918.8
1	sp|Q16881|TRXR1_DROME; sp|Q16881-6|TRXR1_DROME; sp|Q16881-5|TRXR1_DROME; sp|Q16881-4|TRXR1_DROME; sp|Q16881-3|TRXR1_DROME; sp|Q16881-2|TRXR1_DROME	Thioredoxin reductase 1, cytoplasmic OS=Homo sapiens GN=TXNRD1 PE=1 SV=3; Isoform 6 of Thioredoxin reductase 1, cytoplasmic OS=Homo sapiens GN=TXNRD1; Isoform 5 of Thioredoxin reductase 1, cytoplasmic OS=Homo sapiens GN=TXNRD1; Isoform 4 of Thioredoxin reductase 1, cytoplasmic OS=Homo sapiens GN=TXNRD1; Isoform 3 of Thioredoxin reductase 1, cytoplasmic OS=Homo sapiens GN=TXNRD1; Isoform 2 of Thio…	0	99	KIGLETVGVK			missed K-I@1	0.000373447	1042.64	522.327	1042.64	522.327	2	17	1.1.1.2099.8	25.3565	282553	25092.6	25.08	0.25	3736.73
1	sp|Q16881|TRXR1_DROME; sp|Q16881-6|TRXR1_DROME; sp|Q16881-5|TRXR1_DROME; sp|Q16881-4|TRXR1_DROME; sp|Q16881-3|TRXR1_DROME; sp|Q16881-2|TRXR1_DROME	Thioredoxin reductase 1, cytoplasmic OS=Homo sapiens GN=TXNRD1 PE=1 SV=3; Isoform 6 of Thioredoxin reductase 1, cytoplasmic OS=Homo sapiens GN=TXNRD1; Isoform 5 of Thioredoxin reductase 1, cytoplasmic OS=Homo sapiens GN=TXNRD1; Isoform 4 of Thioredoxin reductase 1, cytoplasmic OS=Homo sapiens GN=TXNRD1; Isoform 3 of Thioredoxin reductase 1, cytoplasmic OS=Homo sapiens GN=TXNRD1; Isoform 2 of Thio…	0	99	KIGLETVGVK			missed K-I@1	0.000373447	1042.64	522.327	1042.64	522.327	2	15	1.1.1.2100.9	25.3977	282553	14329.5	25.08	0.25	2997.28
1	sp|Q16881|TRXR1_DROME; sp|Q16881-6|TRXR1_DROME; sp|Q16881-5|TRXR1_DROME; sp|Q16881-4|TRXR1_DROME; sp|Q16881-3|TRXR1_DROME; sp|Q16881-2|TRXR1_DROME	Thioredoxin reductase 1, cytoplasmic OS=Homo sapiens GN=TXNRD1 PE=1 SV=3; Isoform 6 of Thioredoxin reductase 1, cytoplasmic OS=Homo sapiens GN=TXNRD1; Isoform 5 of Thioredoxin reductase 1, cytoplasmic OS=Homo sapiens GN=TXNRD1; Isoform 4 of Thioredoxin reductase 1, cytoplasmic OS=Homo sapiens GN=TXNRD1; Isoform 3 of Thioredoxin reductase 1, cytoplasmic OS=Homo sapiens GN=TXNRD1; Isoform 2 of Thio…	0	99	KIGLETVGVK	Formyl(K)@1		missed K-I@1	0.000693735	1070.63	536.324	1070.63	536.324	2	14	1.1.1.2245.7	32.5348	4518.41	4394.68	32.52	0.25	1325.47
1	sp|Q16881|TRXR1_DROME; sp|Q16881-6|TRXR1_DROME; sp|Q16881-5|TRXR1_DROME; sp|Q16881-4|TRXR1_DROME; sp|Q16881-3|TRXR1_DROME; sp|Q16881-2|TRXR1_DROME	Thioredoxin reductase 1, cytoplasmic OS=Homo sapiens GN=TXNRD1 PE=1 SV=3; Isoform 6 of Thioredoxin reductase 1, cytoplasmic OS=Homo sapiens GN=TXNRD1; Isoform 5 of Thioredoxin reductase 1, cytoplasmic OS=Homo sapiens GN=TXNRD1; Isoform 4 of Thioredoxin reductase 1, cytoplasmic OS=Homo sapiens GN=TXNRD1; Isoform 3 of Thioredoxin reductase 1, cytoplasmic OS=Homo sapiens GN=TXNRD1; Isoform 2 of Thio…	0	99	KIGLETVGVK	Formyl@N-term		missed K-I@1	0.000693735	1070.63	536.324	1070.63	536.324	2	14	1.1.1.2245.7	32.5348	4518.41	4394.68	32.52	0.25	1325.47
1	sp|Q16881|TRXR1_DROME; sp|Q16881-6|TRXR1_DROME; sp|Q16881-5|TRXR1_DROME; sp|Q16881-4|TRXR1_DROME; sp|Q16881-3|TRXR1_DROME; sp|Q16881-2|TRXR1_DROME	Thioredoxin reductase 1, cytoplasmic OS=Homo sapiens GN=TXNRD1 PE=1 SV=3; Isoform 6 of Thioredoxin reductase 1, cytoplasmic OS=Homo sapiens GN=TXNRD1; Isoform 5 of Thioredoxin reductase 1, cytoplasmic OS=Homo sapiens GN=TXNRD1; Isoform 4 of Thioredoxin reductase 1, cytoplasmic OS=Homo sapiens GN=TXNRD1; Isoform 3 of Thioredoxin reductase 1, cytoplasmic OS=Homo sapiens GN=TXNRD1; Isoform 2 of Thio…	0	99	KLMHQAALL			cleaved L-G@C-term; missed K-L@1	0.000882463	1023.59	512.803	1023.59	512.802	2	14	1.1.1.2093.4	25.0509	67465.7	20479.2	24.93	0.1	3759.5
1	sp|Q16881|TRXR1_DROME; sp|Q16881-6|TRXR1_DROME; sp|Q16881-5|TRXR1_DROME; sp|Q16881-4|TRXR1_DROME; sp|Q16881-3|TRXR1_DROME; sp|Q16881-2|TRXR1_DROME	Thioredoxin reductase 1, cytoplasmic OS=Homo sapiens GN=TXNRD1 PE=1 SV=3; Isoform 6 of Thioredoxin reductase 1, cytoplasmic OS=Homo sapiens GN=TXNRD1; Isoform 5 of Thioredoxin reductase 1, cytoplasmic OS=Homo sapiens GN=TXNRD1; Isoform 4 of Thioredoxin reductase 1, cytoplasmic OS=Homo sapiens GN=TXNRD1; Isoform 3 of Thioredoxin reductase 1, cytoplasmic OS=Homo sapiens GN=TXNRD1; Isoform 2 of Thio…	0	99	KLMHQAALLGQALQDSR			missed K-L@1	0.000477201	1879.01	627.344	1879.01	627.344	3	26	1.1.1.2265.19	33.5433	115978	82426.1	33.61	0.3	33637.7
1	sp|Q16881|TRXR1_DROME; sp|Q16881-6|TRXR1_DROME; sp|Q16881-5|TRXR1_DROME; sp|Q16881-4|TRXR1_DROME; sp|Q16881-3|TRXR1_DROME; sp|Q16881-2|TRXR1_DROME	Thioredoxin reductase 1, cytoplasmic OS=Homo sapiens GN=TXNRD1 PE=1 SV=3; Isoform 6 of Thioredoxin reductase 1, cytoplasmic OS=Homo sapiens GN=TXNRD1; Isoform 5 of Thioredoxin reductase 1, cytoplasmic OS=Homo sapiens GN=TXNRD1; Isoform 4 of Thioredoxin reductase 1, cytoplasmic OS=Homo sapiens GN=TXNRD1; Isoform 3 of Thioredoxin reductase 1, cytoplasmic OS=Homo sapiens GN=TXNRD1; Isoform 2 of Thio…	0	99	KLMHQAALLGQALQDSR			missed K-L@1	-0.00200626	1879.01	940.511	1879.01	940.512	2	24	1.1.1.2265.25	33.5533	28603.6	17590.5	33.71	0.49	3648.7
1	sp|Q16881|TRXR1_DROME; sp|Q16881-6|TRXR1_DROME; sp|Q16881-5|TRXR1_DROME; sp|Q16881-4|TRXR1_DROME; sp|Q16881-3|TRXR1_DROME; sp|Q16881-2|TRXR1_DROME	Thioredoxin reductase 1, cytoplasmic OS=Homo sapiens GN=TXNRD1 PE=1 SV=3; Isoform 6 of Thioredoxin reductase 1, cytoplasmic OS=Homo sapiens GN=TXNRD1; Isoform 5 of Thioredoxin reductase 1, cytoplasmic OS=Homo sapiens GN=TXNRD1; Isoform 4 of Thioredoxin reductase 1, cytoplasmic OS=Homo sapiens GN=TXNRD1; Isoform 3 of Thioredoxin reductase 1, cytoplasmic OS=Homo sapiens GN=TXNRD1; Isoform 2 of Thio…	0	99	KLMHQAALLGQALQDSR			missed K-L@1	-0.00200626	1879.01	940.511	1879.01	940.512	2	24	1.1.1.2267.3	33.6538	28603.6	26624.5	33.71	0.49	4920.34
1	sp|Q16881|TRXR1_DROME; sp|Q16881-6|TRXR1_DROME; sp|Q16881-5|TRXR1_DROME; sp|Q16881-4|TRXR1_DROME; sp|Q16881-3|TRXR1_DROME; sp|Q16881-2|TRXR1_DROME	Thioredoxin reductase 1, cytoplasmic OS=Homo sapiens GN=TXNRD1 PE=1 SV=3; Isoform 6 of Thioredoxin reductase 1, cytoplasmic OS=Homo sapiens GN=TXNRD1; Isoform 5 of Thioredoxin reductase 1, cytoplasmic OS=Homo sapiens GN=TXNRD1; Isoform 4 of Thioredoxin reductase 1, cytoplasmic OS=Homo sapiens GN=TXNRD1; Isoform 3 of Thioredoxin reductase 1, cytoplasmic OS=Homo sapiens GN=TXNRD1; Isoform 2 of Thio…	0	99	KLMHQAALLGQALQDSR			missed K-L@1	-0.00200626	1879.01	940.511	1879.01	940.512	2	25	1.1.1.2268.7	33.7031	28603.6	28156.9	33.71	0.49	4887.26
1	sp|Q16881|TRXR1_DROME; sp|Q16881-6|TRXR1_DROME; sp|Q16881-5|TRXR1_DROME; sp|Q16881-4|TRXR1_DROME; sp|Q16881-3|TRXR1_DROME; sp|Q16881-2|TRXR1_DROME	Thioredoxin reductase 1, cytoplasmic OS=Homo sapiens GN=TXNRD1 PE=1 SV=3; Isoform 6 of Thioredoxin reductase 1, cytoplasmic OS=Homo sapiens GN=TXNRD1; Isoform 5 of Thioredoxin reductase 1, cytoplasmic OS=Homo sapiens GN=TXNRD1; Isoform 4 of Thioredoxin reductase 1, cytoplasmic OS=Homo sapiens GN=TXNRD1; Isoform 3 of Thioredoxin reductase 1, cytoplasmic OS=Homo sapiens GN=TXNRD1; Isoform 2 of Thio…	0	99	KLMHQAALLGQALQDSR			missed K-L@1	-0.00200626	1879.01	940.511	1879.01	940.512	2	24	1.1.1.2269.8	33.7523	28603.6	28571.3	33.71	0.49	5346.12
1	sp|Q16881|TRXR1_DROME; sp|Q16881-6|TRXR1_DROME; sp|Q16881-5|TRXR1_DROME; sp|Q16881-4|TRXR1_DROME; sp|Q16881-3|TRXR1_DROME; sp|Q16881-2|TRXR1_DROME	Thioredoxin reductase 1, cytoplasmic OS=Homo sapiens GN=TXNRD1 PE=1 SV=3; Isoform 6 of Thioredoxin reductase 1, cytoplasmic OS=Homo sapiens GN=TXNRD1; Isoform 5 of Thioredoxin reductase 1, cytoplasmic OS=Homo sapiens GN=TXNRD1; Isoform 4 of Thioredoxin reductase 1, cytoplasmic OS=Homo sapiens GN=TXNRD1; Isoform 3 of Thioredoxin reductase 1, cytoplasmic OS=Homo sapiens GN=TXNRD1; Isoform 2 of Thio…	0	99	KLMHQAALLGQALQDSR			missed K-L@1	-0.00200626	1879.01	940.511	1879.01	940.512	2	25	1.1.1.2270.11	33.7966	28603.6	25442.4	33.71	0.49	4539.95
1	sp|Q16881|TRXR1_DROME; sp|Q16881-6|TRXR1_DROME; sp|Q16881-5|TRXR1_DROME; sp|Q16881-4|TRXR1_DROME; sp|Q16881-3|TRXR1_DROME; sp|Q16881-2|TRXR1_DROME	Thioredoxin reductase 1, cytoplasmic OS=Homo sapiens GN=TXNRD1 PE=1 SV=3; Isoform 6 of Thioredoxin reductase 1, cytoplasmic OS=Homo sapiens GN=TXNRD1; Isoform 5 of Thioredoxin reductase 1, cytoplasmic OS=Homo sapiens GN=TXNRD1; Isoform 4 of Thioredoxin reductase 1, cytoplasmic OS=Homo sapiens GN=TXNRD1; Isoform 3 of Thioredoxin reductase 1, cytoplasmic OS=Homo sapiens GN=TXNRD1; Isoform 2 of Thio…	0	99	KLMHQAALLGQALQDSR			missed K-L@1	-0.00200626	1879.01	940.511	1879.01	940.512	2	24	1.1.1.2271.10	33.8508	28603.6	23312.6	33.71	0.49	4294.84
1	sp|Q16881|TRXR1_DROME; sp|Q16881-6|TRXR1_DROME; sp|Q16881-5|TRXR1_DROME; sp|Q16881-4|TRXR1_DROME; sp|Q16881-3|TRXR1_DROME; sp|Q16881-2|TRXR1_DROME	Thioredoxin reductase 1, cytoplasmic OS=Homo sapiens GN=TXNRD1 PE=1 SV=3; Isoform 6 of Thioredoxin reductase 1, cytoplasmic OS=Homo sapiens GN=TXNRD1; Isoform 5 of Thioredoxin reductase 1, cytoplasmic OS=Homo sapiens GN=TXNRD1; Isoform 4 of Thioredoxin reductase 1, cytoplasmic OS=Homo sapiens GN=TXNRD1; Isoform 3 of Thioredoxin reductase 1, cytoplasmic OS=Homo sapiens GN=TXNRD1; Isoform 2 of Thio…	0	99	KLMHQAALLGQALQDSR			missed K-L@1	-0.00200626	1879.01	940.511	1879.01	940.512	2	23	1.1.1.2272.14	33.8966	28603.6	20361	33.71	0.49	4397.75
1	sp|Q16881|TRXR1_DROME; sp|Q16881-6|TRXR1_DROME; sp|Q16881-5|TRXR1_DROME; sp|Q16881-4|TRXR1_DROME; sp|Q16881-3|TRXR1_DROME; sp|Q16881-2|TRXR1_DROME	Thioredoxin reductase 1, cytoplasmic OS=Homo sapiens GN=TXNRD1 PE=1 SV=3; Isoform 6 of Thioredoxin reductase 1, cytoplasmic OS=Homo sapiens GN=TXNRD1; Isoform 5 of Thioredoxin reductase 1, cytoplasmic OS=Homo sapiens GN=TXNRD1; Isoform 4 of Thioredoxin reductase 1, cytoplasmic OS=Homo sapiens GN=TXNRD1; Isoform 3 of Thioredoxin reductase 1, cytoplasmic OS=Homo sapiens GN=TXNRD1; Isoform 2 of Thio…	0	99	KLMHQAALLGQALQDSR			missed K-L@1	-0.00200626	1879.01	940.511	1879.01	940.512	2	24	1.1.1.2273.12	33.9494	28603.6	19345.7	33.71	0.49	4171.55
1	sp|Q16881|TRXR1_DROME; sp|Q16881-6|TRXR1_DROME; sp|Q16881-5|TRXR1_DROME; sp|Q16881-4|TRXR1_DROME; sp|Q16881-3|TRXR1_DROME; sp|Q16881-2|TRXR1_DROME	Thioredoxin reductase 1, cytoplasmic OS=Homo sapiens GN=TXNRD1 PE=1 SV=3; Isoform 6 of Thioredoxin reductase 1, cytoplasmic OS=Homo sapiens GN=TXNRD1; Isoform 5 of Thioredoxin reductase 1, cytoplasmic OS=Homo sapiens GN=TXNRD1; Isoform 4 of Thioredoxin reductase 1, cytoplasmic OS=Homo sapiens GN=TXNRD1; Isoform 3 of Thioredoxin reductase 1, cytoplasmic OS=Homo sapiens GN=TXNRD1; Isoform 2 of Thio…	0	99	KLMHQAALLGQALQDSR	Oxidation(M)@3		missed K-L@1	0.000146276	1895.01	474.759	1895	474.758	4	14	1.1.1.2183.4	29.4793	8135.74	6637.56	29.43	0.1	2036.29
1	sp|Q16881|TRXR1_DROME; sp|Q16881-6|TRXR1_DROME; sp|Q16881-5|TRXR1_DROME; sp|Q16881-4|TRXR1_DROME; sp|Q16881-3|TRXR1_DROME; sp|Q16881-2|TRXR1_DROME	Thioredoxin reductase 1, cytoplasmic OS=Homo sapiens GN=TXNRD1 PE=1 SV=3; Isoform 6 of Thioredoxin reductase 1, cytoplasmic OS=Homo sapiens GN=TXNRD1; Isoform 5 of Thioredoxin reductase 1, cytoplasmic OS=Homo sapiens GN=TXNRD1; Isoform 4 of Thioredoxin reductase 1, cytoplasmic OS=Homo sapiens GN=TXNRD1; Isoform 3 of Thioredoxin reductase 1, cytoplasmic OS=Homo sapiens GN=TXNRD1; Isoform 2 of Thio…	0	99	KVMVLDFVTPTPL			cleaved L-G@C-term; missed K-V@1	-0.00011338	1458.82	730.415	1458.82	730.415	2	17	1.1.1.2501.13	45.118	68571.5	60445.9	45.15	0.1	10092.6
1	sp|Q16881|TRXR1_DROME; sp|Q16881-6|TRXR1_DROME; sp|Q16881-5|TRXR1_DROME; sp|Q16881-4|TRXR1_DROME; sp|Q16881-3|TRXR1_DROME; sp|Q16881-2|TRXR1_DROME	Thioredoxin reductase 1, cytoplasmic OS=Homo sapiens GN=TXNRD1 PE=1 SV=3; Isoform 6 of Thioredoxin reductase 1, cytoplasmic OS=Homo sapiens GN=TXNRD1; Isoform 5 of Thioredoxin reductase 1, cytoplasmic OS=Homo sapiens GN=TXNRD1; Isoform 4 of Thioredoxin reductase 1, cytoplasmic OS=Homo sapiens GN=TXNRD1; Isoform 3 of Thioredoxin reductase 1, cytoplasmic OS=Homo sapiens GN=TXNRD1; Isoform 2 of Thio…	0	99	KVMVLDFVTPTPL			cleaved L-G@C-term; missed K-V@1	-0.00011338	1458.82	730.415	1458.82	730.415	2	18	1.1.1.2502.8	45.1657	68571.5	64077.8	45.15	0.1	11062.5
1	sp|Q16881|TRXR1_DROME; sp|Q16881-6|TRXR1_DROME; sp|Q16881-5|TRXR1_DROME; sp|Q16881-4|TRXR1_DROME; sp|Q16881-3|TRXR1_DROME; sp|Q16881-2|TRXR1_DROME	Thioredoxin reductase 1, cytoplasmic OS=Homo sapiens GN=TXNRD1 PE=1 SV=3; Isoform 6 of Thioredoxin reductase 1, cytoplasmic OS=Homo sapiens GN=TXNRD1; Isoform 5 of Thioredoxin reductase 1, cytoplasmic OS=Homo sapiens GN=TXNRD1; Isoform 4 of Thioredoxin reductase 1, cytoplasmic OS=Homo sapiens GN=TXNRD1; Isoform 3 of Thioredoxin reductase 1, cytoplasmic OS=Homo sapiens GN=TXNRD1; Isoform 2 of Thio…	0	99	KVMVLDFVTPTPLGTR			missed K-V@1	0.0022839	1772.99	592.003	1772.99	592.003	3	19	1.1.1.2461.5	43.129	407059	272259	43.21	0.1	20309.6
1	sp|Q16881|TRXR1_DROME; sp|Q16881-6|TRXR1_DROME; sp|Q16881-5|TRXR1_DROME; sp|Q16881-4|TRXR1_DROME; sp|Q16881-3|TRXR1_DROME; sp|Q16881-2|TRXR1_DROME	Thioredoxin reductase 1, cytoplasmic OS=Homo sapiens GN=TXNRD1 PE=1 SV=3; Isoform 6 of Thioredoxin reductase 1, cytoplasmic OS=Homo sapiens GN=TXNRD1; Isoform 5 of Thioredoxin reductase 1, cytoplasmic OS=Homo sapiens GN=TXNRD1; Isoform 4 of Thioredoxin reductase 1, cytoplasmic OS=Homo sapiens GN=TXNRD1; Isoform 3 of Thioredoxin reductase 1, cytoplasmic OS=Homo sapiens GN=TXNRD1; Isoform 2 of Thio…	0	99	KVMVLDFVTPTPLGTR			missed K-V@1	0.0022839	1772.99	592.003	1772.99	592.003	3	22	1.1.1.2463.5	43.2276	407059	366134	43.21	0.1	50792.7
1	sp|Q16881|TRXR1_DROME; sp|Q16881-6|TRXR1_DROME; sp|Q16881-5|TRXR1_DROME; sp|Q16881-4|TRXR1_DROME; sp|Q16881-3|TRXR1_DROME; sp|Q16881-2|TRXR1_DROME	Thioredoxin reductase 1, cytoplasmic OS=Homo sapiens GN=TXNRD1 PE=1 SV=3; Isoform 6 of Thioredoxin reductase 1, cytoplasmic OS=Homo sapiens GN=TXNRD1; Isoform 5 of Thioredoxin reductase 1, cytoplasmic OS=Homo sapiens GN=TXNRD1; Isoform 4 of Thioredoxin reductase 1, cytoplasmic OS=Homo sapiens GN=TXNRD1; Isoform 3 of Thioredoxin reductase 1, cytoplasmic OS=Homo sapiens GN=TXNRD1; Isoform 2 of Thio…	0	99	KVVYENAYGQF	Deamidated(N)@6		cleaved F-I@C-term; missed K-V@1	0.00241497	1317.63	659.821	1317.62	659.819	2	11	1.1.1.2276.7	34.0769	2078.25	1743.91	34.05	0.2	568.872
1	sp|Q16881|TRXR1_DROME; sp|Q16881-6|TRXR1_DROME; sp|Q16881-5|TRXR1_DROME; sp|Q16881-4|TRXR1_DROME; sp|Q16881-3|TRXR1_DROME; sp|Q16881-2|TRXR1_DROME	Thioredoxin reductase 1, cytoplasmic OS=Homo sapiens GN=TXNRD1 PE=1 SV=3; Isoform 6 of Thioredoxin reductase 1, cytoplasmic OS=Homo sapiens GN=TXNRD1; Isoform 5 of Thioredoxin reductase 1, cytoplasmic OS=Homo sapiens GN=TXNRD1; Isoform 4 of Thioredoxin reductase 1, cytoplasmic OS=Homo sapiens GN=TXNRD1; Isoform 3 of Thioredoxin reductase 1, cytoplasmic OS=Homo sapiens GN=TXNRD1; Isoform 2 of Thio…	0	99	KVVYENAYGQF	Deamidated(N)@6		cleaved F-I@C-term; missed K-V@1	0.00265911	1317.63	659.821	1317.62	659.819	2	12	1.1.1.2262.16	33.3899	7057.12	6299.53	33.36	0.2	1566.69
1	sp|Q16881|TRXR1_DROME; sp|Q16881-6|TRXR1_DROME; sp|Q16881-5|TRXR1_DROME; sp|Q16881-4|TRXR1_DROME; sp|Q16881-3|TRXR1_DROME; sp|Q16881-2|TRXR1_DROME	Thioredoxin reductase 1, cytoplasmic OS=Homo sapiens GN=TXNRD1 PE=1 SV=3; Isoform 6 of Thioredoxin reductase 1, cytoplasmic OS=Homo sapiens GN=TXNRD1; Isoform 5 of Thioredoxin reductase 1, cytoplasmic OS=Homo sapiens GN=TXNRD1; Isoform 4 of Thioredoxin reductase 1, cytoplasmic OS=Homo sapiens GN=TXNRD1; Isoform 3 of Thioredoxin reductase 1, cytoplasmic OS=Homo sapiens GN=TXNRD1; Isoform 2 of Thio…	0	99	KVVYENAYGQFIGPHR	Deamidated(N)@6		missed K-V@1	0.0272504	1877.97	626.997	1877.94	626.988	3	25	1.1.1.2202.16	30.4416	50545.3	49476.8	30.46	0.25	19791.9
1	sp|Q16881|TRXR1_DROME; sp|Q16881-6|TRXR1_DROME; sp|Q16881-5|TRXR1_DROME; sp|Q16881-4|TRXR1_DROME; sp|Q16881-3|TRXR1_DROME; sp|Q16881-2|TRXR1_DROME	Thioredoxin reductase 1, cytoplasmic OS=Homo sapiens GN=TXNRD1 PE=1 SV=3; Isoform 6 of Thioredoxin reductase 1, cytoplasmic OS=Homo sapiens GN=TXNRD1; Isoform 5 of Thioredoxin reductase 1, cytoplasmic OS=Homo sapiens GN=TXNRD1; Isoform 4 of Thioredoxin reductase 1, cytoplasmic OS=Homo sapiens GN=TXNRD1; Isoform 3 of Thioredoxin reductase 1, cytoplasmic OS=Homo sapiens GN=TXNRD1; Isoform 2 of Thio…	0	99	KVVYENAYGQFIGPHR	Deamidated(N)@6		missed K-V@1	0.00493429	1877.95	470.494	1877.94	470.493	4	18	1.1.1.2239.4	32.2342	12791.4	12304.5	32.22	0.15	5419.9
1	sp|Q16881|TRXR1_DROME; sp|Q16881-6|TRXR1_DROME; sp|Q16881-5|TRXR1_DROME; sp|Q16881-4|TRXR1_DROME; sp|Q16881-3|TRXR1_DROME; sp|Q16881-2|TRXR1_DROME	Thioredoxin reductase 1, cytoplasmic OS=Homo sapiens GN=TXNRD1 PE=1 SV=3; Isoform 6 of Thioredoxin reductase 1, cytoplasmic OS=Homo sapiens GN=TXNRD1; Isoform 5 of Thioredoxin reductase 1, cytoplasmic OS=Homo sapiens GN=TXNRD1; Isoform 4 of Thioredoxin reductase 1, cytoplasmic OS=Homo sapiens GN=TXNRD1; Isoform 3 of Thioredoxin reductase 1, cytoplasmic OS=Homo sapiens GN=TXNRD1; Isoform 2 of Thio…	0	99	LIATGERPR			cleaved F-L@N-term	0.000709029	1011.58	506.799	1011.58	506.799	2	11	1.1.1.2086.9	24.713	11423	7432.92	24.59	0.3	879.361
1	sp|Q16881|TRXR1_DROME; sp|Q16881-6|TRXR1_DROME; sp|Q16881-5|TRXR1_DROME; sp|Q16881-4|TRXR1_DROME; sp|Q16881-3|TRXR1_DROME; sp|Q16881-2|TRXR1_DROME	Thioredoxin reductase 1, cytoplasmic OS=Homo sapiens GN=TXNRD1 PE=1 SV=3; Isoform 6 of Thioredoxin reductase 1, cytoplasmic OS=Homo sapiens GN=TXNRD1; Isoform 5 of Thioredoxin reductase 1, cytoplasmic OS=Homo sapiens GN=TXNRD1; Isoform 4 of Thioredoxin reductase 1, cytoplasmic OS=Homo sapiens GN=TXNRD1; Isoform 3 of Thioredoxin reductase 1, cytoplasmic OS=Homo sapiens GN=TXNRD1; Isoform 2 of Thio…	0	99	LLGQALQDSR			cleaved A-L@N-term	0.00113099	1099.6	550.807	1099.6	550.807	2	15	1.1.1.2100.14	25.406	46664.8	32856.3	25.48	0.15	6422.22
1	sp|Q16881|TRXR1_DROME; sp|Q16881-6|TRXR1_DROME; sp|Q16881-5|TRXR1_DROME; sp|Q16881-4|TRXR1_DROME; sp|Q16881-3|TRXR1_DROME; sp|Q16881-2|TRXR1_DROME	Thioredoxin reductase 1, cytoplasmic OS=Homo sapiens GN=TXNRD1 PE=1 SV=3; Isoform 6 of Thioredoxin reductase 1, cytoplasmic OS=Homo sapiens GN=TXNRD1; Isoform 5 of Thioredoxin reductase 1, cytoplasmic OS=Homo sapiens GN=TXNRD1; Isoform 4 of Thioredoxin reductase 1, cytoplasmic OS=Homo sapiens GN=TXNRD1; Isoform 3 of Thioredoxin reductase 1, cytoplasmic OS=Homo sapiens GN=TXNRD1; Isoform 2 of Thio…	0	99	LLGQALQDSR			cleaved A-L@N-term	0.00113099	1099.6	550.807	1099.6	550.807	2	15	1.1.1.2102.16	25.5082	46664.8	40454.7	25.48	0.15	7510.25
1	sp|Q16881|TRXR1_DROME; sp|Q16881-6|TRXR1_DROME; sp|Q16881-5|TRXR1_DROME; sp|Q16881-4|TRXR1_DROME; sp|Q16881-3|TRXR1_DROME; sp|Q16881-2|TRXR1_DROME	Thioredoxin reductase 1, cytoplasmic OS=Homo sapiens GN=TXNRD1 PE=1 SV=3; Isoform 6 of Thioredoxin reductase 1, cytoplasmic OS=Homo sapiens GN=TXNRD1; Isoform 5 of Thioredoxin reductase 1, cytoplasmic OS=Homo sapiens GN=TXNRD1; Isoform 4 of Thioredoxin reductase 1, cytoplasmic OS=Homo sapiens GN=TXNRD1; Isoform 3 of Thioredoxin reductase 1, cytoplasmic OS=Homo sapiens GN=TXNRD1; Isoform 2 of Thio…	0	99	LLGQALQDSR			cleaved A-L@N-term	0.00113099	1099.6	550.807	1099.6	550.807	2	17	1.1.1.2103.12	25.5505	46664.8	27670.2	25.48	0.15	5119.13
1	sp|Q16881|TRXR1_DROME; sp|Q16881-6|TRXR1_DROME; sp|Q16881-5|TRXR1_DROME; sp|Q16881-4|TRXR1_DROME; sp|Q16881-3|TRXR1_DROME; sp|Q16881-2|TRXR1_DROME	Thioredoxin reductase 1, cytoplasmic OS=Homo sapiens GN=TXNRD1 PE=1 SV=3; Isoform 6 of Thioredoxin reductase 1, cytoplasmic OS=Homo sapiens GN=TXNRD1; Isoform 5 of Thioredoxin reductase 1, cytoplasmic OS=Homo sapiens GN=TXNRD1; Isoform 4 of Thioredoxin reductase 1, cytoplasmic OS=Homo sapiens GN=TXNRD1; Isoform 3 of Thioredoxin reductase 1, cytoplasmic OS=Homo sapiens GN=TXNRD1; Isoform 2 of Thio…	0	99	LLGQALQDSR			cleaved A-L@N-term	0.00113099	1099.6	550.807	1099.6	550.807	2	15	1.1.1.2104.8	25.605	46664.8	11610.5	25.48	0.15	1939.01
1	sp|Q16881|TRXR1_DROME; sp|Q16881-6|TRXR1_DROME; sp|Q16881-5|TRXR1_DROME; sp|Q16881-4|TRXR1_DROME; sp|Q16881-3|TRXR1_DROME; sp|Q16881-2|TRXR1_DROME	Thioredoxin reductase 1, cytoplasmic OS=Homo sapiens GN=TXNRD1 PE=1 SV=3; Isoform 6 of Thioredoxin reductase 1, cytoplasmic OS=Homo sapiens GN=TXNRD1; Isoform 5 of Thioredoxin reductase 1, cytoplasmic OS=Homo sapiens GN=TXNRD1; Isoform 4 of Thioredoxin reductase 1, cytoplasmic OS=Homo sapiens GN=TXNRD1; Isoform 3 of Thioredoxin reductase 1, cytoplasmic OS=Homo sapiens GN=TXNRD1; Isoform 2 of Thio…	0	99	LMHQAALLGQ			cleaved Q-A@C-term	-0.00153831	1080.57	541.294	1080.57	541.295	2	12	1.1.1.2158.16	28.2645	25443.9	23867.8	28.29	0.15	5994.96
1	sp|Q16881|TRXR1_DROME; sp|Q16881-6|TRXR1_DROME; sp|Q16881-5|TRXR1_DROME; sp|Q16881-4|TRXR1_DROME; sp|Q16881-3|TRXR1_DROME; sp|Q16881-2|TRXR1_DROME	Thioredoxin reductase 1, cytoplasmic OS=Homo sapiens GN=TXNRD1 PE=1 SV=3; Isoform 6 of Thioredoxin reductase 1, cytoplasmic OS=Homo sapiens GN=TXNRD1; Isoform 5 of Thioredoxin reductase 1, cytoplasmic OS=Homo sapiens GN=TXNRD1; Isoform 4 of Thioredoxin reductase 1, cytoplasmic OS=Homo sapiens GN=TXNRD1; Isoform 3 of Thioredoxin reductase 1, cytoplasmic OS=Homo sapiens GN=TXNRD1; Isoform 2 of Thio…	0	99	LMHQAALLGQ			cleaved Q-A@C-term	-0.00153831	1080.57	541.294	1080.57	541.295	2	12	1.1.1.2159.18	28.3175	25443.9	22292.7	28.29	0.15	5204.82
1	sp|Q16881|TRXR1_DROME; sp|Q16881-6|TRXR1_DROME; sp|Q16881-5|TRXR1_DROME; sp|Q16881-4|TRXR1_DROME; sp|Q16881-3|TRXR1_DROME; sp|Q16881-2|TRXR1_DROME	Thioredoxin reductase 1, cytoplasmic OS=Homo sapiens GN=TXNRD1 PE=1 SV=3; Isoform 6 of Thioredoxin reductase 1, cytoplasmic OS=Homo sapiens GN=TXNRD1; Isoform 5 of Thioredoxin reductase 1, cytoplasmic OS=Homo sapiens GN=TXNRD1; Isoform 4 of Thioredoxin reductase 1, cytoplasmic OS=Homo sapiens GN=TXNRD1; Isoform 3 of Thioredoxin reductase 1, cytoplasmic OS=Homo sapiens GN=TXNRD1; Isoform 2 of Thio…	0	99	LMHQAALLGQ			cleaved Q-A@C-term	-0.00153831	1080.57	541.294	1080.57	541.295	2	12	1.1.1.2160.16	28.3635	25443.9	15162.6	28.29	0.15	2851.59
1	sp|Q16881|TRXR1_DROME; sp|Q16881-6|TRXR1_DROME; sp|Q16881-5|TRXR1_DROME; sp|Q16881-4|TRXR1_DROME; sp|Q16881-3|TRXR1_DROME; sp|Q16881-2|TRXR1_DROME	Thioredoxin reductase 1, cytoplasmic OS=Homo sapiens GN=TXNRD1 PE=1 SV=3; Isoform 6 of Thioredoxin reductase 1, cytoplasmic OS=Homo sapiens GN=TXNRD1; Isoform 5 of Thioredoxin reductase 1, cytoplasmic OS=Homo sapiens GN=TXNRD1; Isoform 4 of Thioredoxin reductase 1, cytoplasmic OS=Homo sapiens GN=TXNRD1; Isoform 3 of Thioredoxin reductase 1, cytoplasmic OS=Homo sapiens GN=TXNRD1; Isoform 2 of Thio…	0	99	LMHQAALLGQ			cleaved Q-A@C-term	-0.00153831	1080.57	541.294	1080.57	541.295	2	11	1.1.1.2161.20	28.4199	25443.9	6349.2	28.29	0.15	1252.76
1	sp|Q16881|TRXR1_DROME; sp|Q16881-6|TRXR1_DROME; sp|Q16881-5|TRXR1_DROME; sp|Q16881-4|TRXR1_DROME; sp|Q16881-3|TRXR1_DROME; sp|Q16881-2|TRXR1_DROME	Thioredoxin reductase 1, cytoplasmic OS=Homo sapiens GN=TXNRD1 PE=1 SV=3; Isoform 6 of Thioredoxin reductase 1, cytoplasmic OS=Homo sapiens GN=TXNRD1; Isoform 5 of Thioredoxin reductase 1, cytoplasmic OS=Homo sapiens GN=TXNRD1; Isoform 4 of Thioredoxin reductase 1, cytoplasmic OS=Homo sapiens GN=TXNRD1; Isoform 3 of Thioredoxin reductase 1, cytoplasmic OS=Homo sapiens GN=TXNRD1; Isoform 2 of Thio…	0	99	LMHQAALLGQALQDSR				0.00189259	1750.92	876.466	1750.91	876.465	2	25	1.1.1.2336.13	36.9973	72697.6	29805.5	36.91	0.1	3266.18
1	sp|Q16881|TRXR1_DROME; sp|Q16881-6|TRXR1_DROME; sp|Q16881-5|TRXR1_DROME; sp|Q16881-4|TRXR1_DROME; sp|Q16881-3|TRXR1_DROME; sp|Q16881-2|TRXR1_DROME	Thioredoxin reductase 1, cytoplasmic OS=Homo sapiens GN=TXNRD1 PE=1 SV=3; Isoform 6 of Thioredoxin reductase 1, cytoplasmic OS=Homo sapiens GN=TXNRD1; Isoform 5 of Thioredoxin reductase 1, cytoplasmic OS=Homo sapiens GN=TXNRD1; Isoform 4 of Thioredoxin reductase 1, cytoplasmic OS=Homo sapiens GN=TXNRD1; Isoform 3 of Thioredoxin reductase 1, cytoplasmic OS=Homo sapiens GN=TXNRD1; Isoform 2 of Thio…	0	99	LMHQAALLGQALQDSR				0.00105291	1750.92	584.646	1750.91	584.646	3	24	1.1.1.2334.5	36.8868	468444	426392	36.91	0.1	96561.9
1	sp|Q16881|TRXR1_DROME; sp|Q16881-6|TRXR1_DROME; sp|Q16881-5|TRXR1_DROME; sp|Q16881-4|TRXR1_DROME; sp|Q16881-3|TRXR1_DROME; sp|Q16881-2|TRXR1_DROME	Thioredoxin reductase 1, cytoplasmic OS=Homo sapiens GN=TXNRD1 PE=1 SV=3; Isoform 6 of Thioredoxin reductase 1, cytoplasmic OS=Homo sapiens GN=TXNRD1; Isoform 5 of Thioredoxin reductase 1, cytoplasmic OS=Homo sapiens GN=TXNRD1; Isoform 4 of Thioredoxin reductase 1, cytoplasmic OS=Homo sapiens GN=TXNRD1; Isoform 3 of Thioredoxin reductase 1, cytoplasmic OS=Homo sapiens GN=TXNRD1; Isoform 2 of Thio…	0	99	MIEAVQNHIGSL	Deamidated(N)@7		cleaved L-N@C-term	7.2233e-05	1311.65	656.832	1311.65	656.832	2	16	1.1.1.2328.18	36.6441	21376.8	19580.7	36.61	0.2	4467.31
1	sp|Q16881|TRXR1_DROME; sp|Q16881-6|TRXR1_DROME; sp|Q16881-5|TRXR1_DROME; sp|Q16881-4|TRXR1_DROME; sp|Q16881-3|TRXR1_DROME; sp|Q16881-2|TRXR1_DROME	Thioredoxin reductase 1, cytoplasmic OS=Homo sapiens GN=TXNRD1 PE=1 SV=3; Isoform 6 of Thioredoxin reductase 1, cytoplasmic OS=Homo sapiens GN=TXNRD1; Isoform 5 of Thioredoxin reductase 1, cytoplasmic OS=Homo sapiens GN=TXNRD1; Isoform 4 of Thioredoxin reductase 1, cytoplasmic OS=Homo sapiens GN=TXNRD1; Isoform 3 of Thioredoxin reductase 1, cytoplasmic OS=Homo sapiens GN=TXNRD1; Isoform 2 of Thio…	0	99	MIEAVQNHIGSL			cleaved L-N@C-term	-0.00114184	1310.66	656.339	1310.67	656.34	2	20	1.1.1.2312.7	35.8432	148859	140731	35.82	0.25	26192.8
1	sp|Q16881|TRXR1_DROME; sp|Q16881-6|TRXR1_DROME; sp|Q16881-5|TRXR1_DROME; sp|Q16881-4|TRXR1_DROME; sp|Q16881-3|TRXR1_DROME; sp|Q16881-2|TRXR1_DROME	Thioredoxin reductase 1, cytoplasmic OS=Homo sapiens GN=TXNRD1 PE=1 SV=3; Isoform 6 of Thioredoxin reductase 1, cytoplasmic OS=Homo sapiens GN=TXNRD1; Isoform 5 of Thioredoxin reductase 1, cytoplasmic OS=Homo sapiens GN=TXNRD1; Isoform 4 of Thioredoxin reductase 1, cytoplasmic OS=Homo sapiens GN=TXNRD1; Isoform 3 of Thioredoxin reductase 1, cytoplasmic OS=Homo sapiens GN=TXNRD1; Isoform 2 of Thio…	0	99	MIEAVQNHIGSL	Deamidated(N)@7		cleaved L-N@C-term	-0.000782259	1311.65	656.832	1311.65	656.832	2	13	1.1.1.2361.15	38.2217	7721.56	6615.63	38.19	0.15	1890.01
1	sp|Q16881|TRXR1_DROME; sp|Q16881-6|TRXR1_DROME; sp|Q16881-5|TRXR1_DROME; sp|Q16881-4|TRXR1_DROME; sp|Q16881-3|TRXR1_DROME; sp|Q16881-2|TRXR1_DROME	Thioredoxin reductase 1, cytoplasmic OS=Homo sapiens GN=TXNRD1 PE=1 SV=3; Isoform 6 of Thioredoxin reductase 1, cytoplasmic OS=Homo sapiens GN=TXNRD1; Isoform 5 of Thioredoxin reductase 1, cytoplasmic OS=Homo sapiens GN=TXNRD1; Isoform 4 of Thioredoxin reductase 1, cytoplasmic OS=Homo sapiens GN=TXNRD1; Isoform 3 of Thioredoxin reductase 1, cytoplasmic OS=Homo sapiens GN=TXNRD1; Isoform 2 of Thio…	0	99	MIEAVQNHIGSL			cleaved L-N@C-term	-0.00114184	1310.66	656.339	1310.67	656.34	2	20	1.1.1.2311.12	35.8103	148859	147193	35.82	0.25	29950.1
1	sp|Q16881|TRXR1_DROME; sp|Q16881-6|TRXR1_DROME; sp|Q16881-5|TRXR1_DROME; sp|Q16881-4|TRXR1_DROME; sp|Q16881-3|TRXR1_DROME; sp|Q16881-2|TRXR1_DROME	Thioredoxin reductase 1, cytoplasmic OS=Homo sapiens GN=TXNRD1 PE=1 SV=3; Isoform 6 of Thioredoxin reductase 1, cytoplasmic OS=Homo sapiens GN=TXNRD1; Isoform 5 of Thioredoxin reductase 1, cytoplasmic OS=Homo sapiens GN=TXNRD1; Isoform 4 of Thioredoxin reductase 1, cytoplasmic OS=Homo sapiens GN=TXNRD1; Isoform 3 of Thioredoxin reductase 1, cytoplasmic OS=Homo sapiens GN=TXNRD1; Isoform 2 of Thio…	0	99	MIEAVQNHIGSLNW	Oxidation(M)@1		cleaved W-G@C-term	-0.00241902	1626.78	814.397	1626.78	814.398	2	20	1.1.1.2426.22	41.4322	10992.8	10650.2	41.47	0.1	4674.48
1	sp|Q16881|TRXR1_DROME; sp|Q16881-6|TRXR1_DROME; sp|Q16881-5|TRXR1_DROME; sp|Q16881-4|TRXR1_DROME; sp|Q16881-3|TRXR1_DROME; sp|Q16881-2|TRXR1_DROME	Thioredoxin reductase 1, cytoplasmic OS=Homo sapiens GN=TXNRD1 PE=1 SV=3; Isoform 6 of Thioredoxin reductase 1, cytoplasmic OS=Homo sapiens GN=TXNRD1; Isoform 5 of Thioredoxin reductase 1, cytoplasmic OS=Homo sapiens GN=TXNRD1; Isoform 4 of Thioredoxin reductase 1, cytoplasmic OS=Homo sapiens GN=TXNRD1; Isoform 3 of Thioredoxin reductase 1, cytoplasmic OS=Homo sapiens GN=TXNRD1; Isoform 2 of Thio…	0	99	MIEAVQNHIGSLNW			cleaved W-G@C-term	6.31101e-05	1610.79	806.401	1610.79	806.401	2	23	1.1.1.2455.16	42.8508	783881	415510	42.78	0.1	16373
1	sp|Q16881|TRXR1_DROME; sp|Q16881-6|TRXR1_DROME; sp|Q16881-5|TRXR1_DROME; sp|Q16881-4|TRXR1_DROME; sp|Q16881-3|TRXR1_DROME; sp|Q16881-2|TRXR1_DROME	Thioredoxin reductase 1, cytoplasmic OS=Homo sapiens GN=TXNRD1 PE=1 SV=3; Isoform 6 of Thioredoxin reductase 1, cytoplasmic OS=Homo sapiens GN=TXNRD1; Isoform 5 of Thioredoxin reductase 1, cytoplasmic OS=Homo sapiens GN=TXNRD1; Isoform 4 of Thioredoxin reductase 1, cytoplasmic OS=Homo sapiens GN=TXNRD1; Isoform 3 of Thioredoxin reductase 1, cytoplasmic OS=Homo sapiens GN=TXNRD1; Isoform 2 of Thio…	0	99	MIEAVQNHIGSLNW			cleaved W-G@C-term	6.31101e-05	1610.79	806.401	1610.79	806.401	2	25	1.1.1.2454.15	42.7997	783881	746653	42.78	0.1	102486
1	sp|Q16881|TRXR1_DROME; sp|Q16881-6|TRXR1_DROME; sp|Q16881-5|TRXR1_DROME; sp|Q16881-4|TRXR1_DROME; sp|Q16881-3|TRXR1_DROME; sp|Q16881-2|TRXR1_DROME	Thioredoxin reductase 1, cytoplasmic OS=Homo sapiens GN=TXNRD1 PE=1 SV=3; Isoform 6 of Thioredoxin reductase 1, cytoplasmic OS=Homo sapiens GN=TXNRD1; Isoform 5 of Thioredoxin reductase 1, cytoplasmic OS=Homo sapiens GN=TXNRD1; Isoform 4 of Thioredoxin reductase 1, cytoplasmic OS=Homo sapiens GN=TXNRD1; Isoform 3 of Thioredoxin reductase 1, cytoplasmic OS=Homo sapiens GN=TXNRD1; Isoform 2 of Thio…	0	99	MIEAVQNHIGSLNW			cleaved W-G@C-term	6.31101e-05	1610.79	806.401	1610.79	806.401	2	25	1.1.1.2453.17	42.7535	783881	726084	42.78	0.1	129229
1	sp|Q16881|TRXR1_DROME; sp|Q16881-6|TRXR1_DROME; sp|Q16881-5|TRXR1_DROME; sp|Q16881-4|TRXR1_DROME; sp|Q16881-3|TRXR1_DROME; sp|Q16881-2|TRXR1_DROME	Thioredoxin reductase 1, cytoplasmic OS=Homo sapiens GN=TXNRD1 PE=1 SV=3; Isoform 6 of Thioredoxin reductase 1, cytoplasmic OS=Homo sapiens GN=TXNRD1; Isoform 5 of Thioredoxin reductase 1, cytoplasmic OS=Homo sapiens GN=TXNRD1; Isoform 4 of Thioredoxin reductase 1, cytoplasmic OS=Homo sapiens GN=TXNRD1; Isoform 3 of Thioredoxin reductase 1, cytoplasmic OS=Homo sapiens GN=TXNRD1; Isoform 2 of Thio…	0	99	MIEAVQNHIGSLNWGYR				-0.000655075	1986.97	663.332	1986.97	663.332	3	18	1.1.1.2417.9	40.9798	98816.6	96054.6	40.96	0.2	15395.9
1	sp|Q16881|TRXR1_DROME; sp|Q16881-6|TRXR1_DROME; sp|Q16881-5|TRXR1_DROME; sp|Q16881-4|TRXR1_DROME; sp|Q16881-3|TRXR1_DROME; sp|Q16881-2|TRXR1_DROME	Thioredoxin reductase 1, cytoplasmic OS=Homo sapiens GN=TXNRD1 PE=1 SV=3; Isoform 6 of Thioredoxin reductase 1, cytoplasmic OS=Homo sapiens GN=TXNRD1; Isoform 5 of Thioredoxin reductase 1, cytoplasmic OS=Homo sapiens GN=TXNRD1; Isoform 4 of Thioredoxin reductase 1, cytoplasmic OS=Homo sapiens GN=TXNRD1; Isoform 3 of Thioredoxin reductase 1, cytoplasmic OS=Homo sapiens GN=TXNRD1; Isoform 2 of Thio…	0	99	MIEAVQNHIGSLNWGYR				-0.000902495	1986.97	994.494	1986.97	994.494	2	22	1.1.1.2418.17	41.0423	17814.7	16963.5	41	0.34	2381.19
1	sp|Q16881|TRXR1_DROME; sp|Q16881-6|TRXR1_DROME; sp|Q16881-5|TRXR1_DROME; sp|Q16881-4|TRXR1_DROME; sp|Q16881-3|TRXR1_DROME; sp|Q16881-2|TRXR1_DROME	Thioredoxin reductase 1, cytoplasmic OS=Homo sapiens GN=TXNRD1 PE=1 SV=3; Isoform 6 of Thioredoxin reductase 1, cytoplasmic OS=Homo sapiens GN=TXNRD1; Isoform 5 of Thioredoxin reductase 1, cytoplasmic OS=Homo sapiens GN=TXNRD1; Isoform 4 of Thioredoxin reductase 1, cytoplasmic OS=Homo sapiens GN=TXNRD1; Isoform 3 of Thioredoxin reductase 1, cytoplasmic OS=Homo sapiens GN=TXNRD1; Isoform 2 of Thio…	0	99	NYGWKVEETVK			missed K-V@5	-0.000199401	1351.68	676.846	1351.68	676.846	2	17	1.1.1.2120.13	26.4048	11163.1	2026.16	26.71	0.25	505.404
1	sp|Q16881|TRXR1_DROME; sp|Q16881-6|TRXR1_DROME; sp|Q16881-5|TRXR1_DROME; sp|Q16881-4|TRXR1_DROME; sp|Q16881-3|TRXR1_DROME; sp|Q16881-2|TRXR1_DROME	Thioredoxin reductase 1, cytoplasmic OS=Homo sapiens GN=TXNRD1 PE=1 SV=3; Isoform 6 of Thioredoxin reductase 1, cytoplasmic OS=Homo sapiens GN=TXNRD1; Isoform 5 of Thioredoxin reductase 1, cytoplasmic OS=Homo sapiens GN=TXNRD1; Isoform 4 of Thioredoxin reductase 1, cytoplasmic OS=Homo sapiens GN=TXNRD1; Isoform 3 of Thioredoxin reductase 1, cytoplasmic OS=Homo sapiens GN=TXNRD1; Isoform 2 of Thio…	0	99	QAALLGQALQDSR			cleaved H-Q@N-term	0.000510466	1369.73	685.873	1369.73	685.873	2	12	1.1.1.2261.22	33.3503	10771.8	10144.8	33.36	0.15	2116.62
1	sp|Q16881|TRXR1_DROME; sp|Q16881-6|TRXR1_DROME; sp|Q16881-5|TRXR1_DROME; sp|Q16881-4|TRXR1_DROME; sp|Q16881-3|TRXR1_DROME; sp|Q16881-2|TRXR1_DROME	Thioredoxin reductase 1, cytoplasmic OS=Homo sapiens GN=TXNRD1 PE=1 SV=3; Isoform 6 of Thioredoxin reductase 1, cytoplasmic OS=Homo sapiens GN=TXNRD1; Isoform 5 of Thioredoxin reductase 1, cytoplasmic OS=Homo sapiens GN=TXNRD1; Isoform 4 of Thioredoxin reductase 1, cytoplasmic OS=Homo sapiens GN=TXNRD1; Isoform 3 of Thioredoxin reductase 1, cytoplasmic OS=Homo sapiens GN=TXNRD1; Isoform 2 of Thio…	0	99	QFVPIKVEQIEAGTPGR			missed K-V@6	0.00175831	1868.02	623.68	1868.02	623.679	3	21	1.1.1.2336.6	36.974	765486	263598	37.11	0.2	16096.5
1	sp|Q16881|TRXR1_DROME; sp|Q16881-6|TRXR1_DROME; sp|Q16881-5|TRXR1_DROME; sp|Q16881-4|TRXR1_DROME; sp|Q16881-3|TRXR1_DROME; sp|Q16881-2|TRXR1_DROME	Thioredoxin reductase 1, cytoplasmic OS=Homo sapiens GN=TXNRD1 PE=1 SV=3; Isoform 6 of Thioredoxin reductase 1, cytoplasmic OS=Homo sapiens GN=TXNRD1; Isoform 5 of Thioredoxin reductase 1, cytoplasmic OS=Homo sapiens GN=TXNRD1; Isoform 4 of Thioredoxin reductase 1, cytoplasmic OS=Homo sapiens GN=TXNRD1; Isoform 3 of Thioredoxin reductase 1, cytoplasmic OS=Homo sapiens GN=TXNRD1; Isoform 2 of Thio…	0	99	QFVPIKVEQIEAGTPGR			missed K-V@6	0.00175831	1868.02	623.68	1868.02	623.679	3	26	1.1.1.2338.12	37.0823	765486	743612	37.11	0.2	220881
1	sp|Q16881|TRXR1_DROME; sp|Q16881-6|TRXR1_DROME; sp|Q16881-5|TRXR1_DROME; sp|Q16881-4|TRXR1_DROME; sp|Q16881-3|TRXR1_DROME; sp|Q16881-2|TRXR1_DROME	Thioredoxin reductase 1, cytoplasmic OS=Homo sapiens GN=TXNRD1 PE=1 SV=3; Isoform 6 of Thioredoxin reductase 1, cytoplasmic OS=Homo sapiens GN=TXNRD1; Isoform 5 of Thioredoxin reductase 1, cytoplasmic OS=Homo sapiens GN=TXNRD1; Isoform 4 of Thioredoxin reductase 1, cytoplasmic OS=Homo sapiens GN=TXNRD1; Isoform 3 of Thioredoxin reductase 1, cytoplasmic OS=Homo sapiens GN=TXNRD1; Isoform 2 of Thio…	0	99	QFVPIKVEQIEAGTPGR			missed K-V@6	0.00175831	1868.02	623.68	1868.02	623.679	3	26	1.1.1.2339.14	37.1348	765486	681765	37.11	0.2	171785
1	sp|Q16881|TRXR1_DROME; sp|Q16881-6|TRXR1_DROME; sp|Q16881-5|TRXR1_DROME; sp|Q16881-4|TRXR1_DROME; sp|Q16881-3|TRXR1_DROME; sp|Q16881-2|TRXR1_DROME	Thioredoxin reductase 1, cytoplasmic OS=Homo sapiens GN=TXNRD1 PE=1 SV=3; Isoform 6 of Thioredoxin reductase 1, cytoplasmic OS=Homo sapiens GN=TXNRD1; Isoform 5 of Thioredoxin reductase 1, cytoplasmic OS=Homo sapiens GN=TXNRD1; Isoform 4 of Thioredoxin reductase 1, cytoplasmic OS=Homo sapiens GN=TXNRD1; Isoform 3 of Thioredoxin reductase 1, cytoplasmic OS=Homo sapiens GN=TXNRD1; Isoform 2 of Thio…	0	99	QFVPIKVEQIEAGTPGR			missed K-V@6	0.00175831	1868.02	623.68	1868.02	623.679	3	25	1.1.1.2340.9	37.1758	765486	557420	37.11	0.2	131295
1	sp|Q16881|TRXR1_DROME; sp|Q16881-6|TRXR1_DROME; sp|Q16881-5|TRXR1_DROME; sp|Q16881-4|TRXR1_DROME; sp|Q16881-3|TRXR1_DROME; sp|Q16881-2|TRXR1_DROME	Thioredoxin reductase 1, cytoplasmic OS=Homo sapiens GN=TXNRD1 PE=1 SV=3; Isoform 6 of Thioredoxin reductase 1, cytoplasmic OS=Homo sapiens GN=TXNRD1; Isoform 5 of Thioredoxin reductase 1, cytoplasmic OS=Homo sapiens GN=TXNRD1; Isoform 4 of Thioredoxin reductase 1, cytoplasmic OS=Homo sapiens GN=TXNRD1; Isoform 3 of Thioredoxin reductase 1, cytoplasmic OS=Homo sapiens GN=TXNRD1; Isoform 2 of Thio…	0	99	QFVPIKVEQIEAGTPGR			missed K-V@6	0.00175831	1868.02	623.68	1868.02	623.679	3	25	1.1.1.2341.9	37.2251	765486	426345	37.11	0.2	80198.1
1	sp|Q16881|TRXR1_DROME; sp|Q16881-6|TRXR1_DROME; sp|Q16881-5|TRXR1_DROME; sp|Q16881-4|TRXR1_DROME; sp|Q16881-3|TRXR1_DROME; sp|Q16881-2|TRXR1_DROME	Thioredoxin reductase 1, cytoplasmic OS=Homo sapiens GN=TXNRD1 PE=1 SV=3; Isoform 6 of Thioredoxin reductase 1, cytoplasmic OS=Homo sapiens GN=TXNRD1; Isoform 5 of Thioredoxin reductase 1, cytoplasmic OS=Homo sapiens GN=TXNRD1; Isoform 4 of Thioredoxin reductase 1, cytoplasmic OS=Homo sapiens GN=TXNRD1; Isoform 3 of Thioredoxin reductase 1, cytoplasmic OS=Homo sapiens GN=TXNRD1; Isoform 2 of Thio…	0	99	QFVPIKVEQIEAGTPGR			missed K-V@6	0.00175831	1868.02	623.68	1868.02	623.679	3	22	1.1.1.2342.11	37.2778	765486	264770	37.11	0.2	43829.1
1	sp|Q16881|TRXR1_DROME; sp|Q16881-6|TRXR1_DROME; sp|Q16881-5|TRXR1_DROME; sp|Q16881-4|TRXR1_DROME; sp|Q16881-3|TRXR1_DROME; sp|Q16881-2|TRXR1_DROME	Thioredoxin reductase 1, cytoplasmic OS=Homo sapiens GN=TXNRD1 PE=1 SV=3; Isoform 6 of Thioredoxin reductase 1, cytoplasmic OS=Homo sapiens GN=TXNRD1; Isoform 5 of Thioredoxin reductase 1, cytoplasmic OS=Homo sapiens GN=TXNRD1; Isoform 4 of Thioredoxin reductase 1, cytoplasmic OS=Homo sapiens GN=TXNRD1; Isoform 3 of Thioredoxin reductase 1, cytoplasmic OS=Homo sapiens GN=TXNRD1; Isoform 2 of Thio…	0	99	QFVPIKVEQIEAGTPGR			missed K-V@6	0.00175831	1868.02	623.68	1868.02	623.679	3	24	1.1.1.2343.7	37.3316	765486	145115	37.11	0.2	21943.4
1	sp|Q16881|TRXR1_DROME; sp|Q16881-6|TRXR1_DROME; sp|Q16881-5|TRXR1_DROME; sp|Q16881-4|TRXR1_DROME; sp|Q16881-3|TRXR1_DROME; sp|Q16881-2|TRXR1_DROME	Thioredoxin reductase 1, cytoplasmic OS=Homo sapiens GN=TXNRD1 PE=1 SV=3; Isoform 6 of Thioredoxin reductase 1, cytoplasmic OS=Homo sapiens GN=TXNRD1; Isoform 5 of Thioredoxin reductase 1, cytoplasmic OS=Homo sapiens GN=TXNRD1; Isoform 4 of Thioredoxin reductase 1, cytoplasmic OS=Homo sapiens GN=TXNRD1; Isoform 3 of Thioredoxin reductase 1, cytoplasmic OS=Homo sapiens GN=TXNRD1; Isoform 2 of Thio…	0	99	QFVPIKVEQIEAGTPGR			missed K-V@6	0.00175831	1868.02	623.68	1868.02	623.679	3	18	1.1.1.2344.9	37.3729	765486	85166.2	37.11	0.2	12026.4
1	sp|Q16881|TRXR1_DROME; sp|Q16881-6|TRXR1_DROME; sp|Q16881-5|TRXR1_DROME; sp|Q16881-4|TRXR1_DROME; sp|Q16881-3|TRXR1_DROME; sp|Q16881-2|TRXR1_DROME	Thioredoxin reductase 1, cytoplasmic OS=Homo sapiens GN=TXNRD1 PE=1 SV=3; Isoform 6 of Thioredoxin reductase 1, cytoplasmic OS=Homo sapiens GN=TXNRD1; Isoform 5 of Thioredoxin reductase 1, cytoplasmic OS=Homo sapiens GN=TXNRD1; Isoform 4 of Thioredoxin reductase 1, cytoplasmic OS=Homo sapiens GN=TXNRD1; Isoform 3 of Thioredoxin reductase 1, cytoplasmic OS=Homo sapiens GN=TXNRD1; Isoform 2 of Thio…	0	99	QFVPIKVEQIEAGTPGR			missed K-V@6	0.00175831	1868.02	623.68	1868.02	623.679	3	19	1.1.1.2345.9	37.4304	765486	40881.3	37.11	0.2	5549.91
1	sp|Q16881|TRXR1_DROME; sp|Q16881-6|TRXR1_DROME; sp|Q16881-5|TRXR1_DROME; sp|Q16881-4|TRXR1_DROME; sp|Q16881-3|TRXR1_DROME; sp|Q16881-2|TRXR1_DROME	Thioredoxin reductase 1, cytoplasmic OS=Homo sapiens GN=TXNRD1 PE=1 SV=3; Isoform 6 of Thioredoxin reductase 1, cytoplasmic OS=Homo sapiens GN=TXNRD1; Isoform 5 of Thioredoxin reductase 1, cytoplasmic OS=Homo sapiens GN=TXNRD1; Isoform 4 of Thioredoxin reductase 1, cytoplasmic OS=Homo sapiens GN=TXNRD1; Isoform 3 of Thioredoxin reductase 1, cytoplasmic OS=Homo sapiens GN=TXNRD1; Isoform 2 of Thio…	0	99	QFVPIKVEQIEAGTPGR	Gln->pyro-Glu@N-term		missed K-V@6	0.00592903	1851	926.505	1850.99	926.502	2	26	1.1.1.2460.23	43.1095	303018	290540	43.12	0.1	43260
1	sp|Q16881|TRXR1_DROME; sp|Q16881-6|TRXR1_DROME; sp|Q16881-5|TRXR1_DROME; sp|Q16881-4|TRXR1_DROME; sp|Q16881-3|TRXR1_DROME; sp|Q16881-2|TRXR1_DROME	Thioredoxin reductase 1, cytoplasmic OS=Homo sapiens GN=TXNRD1 PE=1 SV=3; Isoform 6 of Thioredoxin reductase 1, cytoplasmic OS=Homo sapiens GN=TXNRD1; Isoform 5 of Thioredoxin reductase 1, cytoplasmic OS=Homo sapiens GN=TXNRD1; Isoform 4 of Thioredoxin reductase 1, cytoplasmic OS=Homo sapiens GN=TXNRD1; Isoform 3 of Thioredoxin reductase 1, cytoplasmic OS=Homo sapiens GN=TXNRD1; Isoform 2 of Thio…	0	99	QFVPIKVEQIEAGTPGR	Gln->pyro-Glu@N-term		missed K-V@6	0.00592903	1851	926.505	1850.99	926.502	2	21	1.1.1.2462.23	43.2083	303018	112788	43.12	0.1	5891.28
1	sp|Q16881|TRXR1_DROME; sp|Q16881-6|TRXR1_DROME; sp|Q16881-5|TRXR1_DROME; sp|Q16881-4|TRXR1_DROME; sp|Q16881-3|TRXR1_DROME; sp|Q16881-2|TRXR1_DROME	Thioredoxin reductase 1, cytoplasmic OS=Homo sapiens GN=TXNRD1 PE=1 SV=3; Isoform 6 of Thioredoxin reductase 1, cytoplasmic OS=Homo sapiens GN=TXNRD1; Isoform 5 of Thioredoxin reductase 1, cytoplasmic OS=Homo sapiens GN=TXNRD1; Isoform 4 of Thioredoxin reductase 1, cytoplasmic OS=Homo sapiens GN=TXNRD1; Isoform 3 of Thioredoxin reductase 1, cytoplasmic OS=Homo sapiens GN=TXNRD1; Isoform 2 of Thio…	0	99	QFVPIKVEQIEAGTPGR	Gln->pyro-Glu@N-term		missed K-V@6	0.00592903	1851	926.505	1850.99	926.502	2	16	1.1.1.2463.16	43.246	303018	46288.5	43.12	0.1	2283.9
1	sp|Q16881|TRXR1_DROME; sp|Q16881-6|TRXR1_DROME; sp|Q16881-5|TRXR1_DROME; sp|Q16881-4|TRXR1_DROME; sp|Q16881-3|TRXR1_DROME; sp|Q16881-2|TRXR1_DROME	Thioredoxin reductase 1, cytoplasmic OS=Homo sapiens GN=TXNRD1 PE=1 SV=3; Isoform 6 of Thioredoxin reductase 1, cytoplasmic OS=Homo sapiens GN=TXNRD1; Isoform 5 of Thioredoxin reductase 1, cytoplasmic OS=Homo sapiens GN=TXNRD1; Isoform 4 of Thioredoxin reductase 1, cytoplasmic OS=Homo sapiens GN=TXNRD1; Isoform 3 of Thioredoxin reductase 1, cytoplasmic OS=Homo sapiens GN=TXNRD1; Isoform 2 of Thio…	0	99	QFVPIKVEQIEAGTPGR			missed K-V@6	0.00175831	1868.02	623.68	1868.02	623.679	3	24	1.1.1.2337.11	37.0314	765486	600575	37.11	0.2	185450
1	sp|Q16881|TRXR1_DROME; sp|Q16881-6|TRXR1_DROME; sp|Q16881-5|TRXR1_DROME; sp|Q16881-4|TRXR1_DROME; sp|Q16881-3|TRXR1_DROME; sp|Q16881-2|TRXR1_DROME	Thioredoxin reductase 1, cytoplasmic OS=Homo sapiens GN=TXNRD1 PE=1 SV=3; Isoform 6 of Thioredoxin reductase 1, cytoplasmic OS=Homo sapiens GN=TXNRD1; Isoform 5 of Thioredoxin reductase 1, cytoplasmic OS=Homo sapiens GN=TXNRD1; Isoform 4 of Thioredoxin reductase 1, cytoplasmic OS=Homo sapiens GN=TXNRD1; Isoform 3 of Thioredoxin reductase 1, cytoplasmic OS=Homo sapiens GN=TXNRD1; Isoform 2 of Thio…	0	99	QFVPIKVEQIEAGTPGR	Dioxidation(P)@4; Lys->Allysine(K)@6	Dioxidation(P)@403; Lys->Allysine(K)@405	missed K-V@6	0.0224512	1899	634.006	1898.97	633.999	3	12	1.1.1.2339.16	37.1381	3301.26	2592.29	37.11	0.15	1108.7
1	sp|Q16881|TRXR1_DROME; sp|Q16881-6|TRXR1_DROME; sp|Q16881-5|TRXR1_DROME; sp|Q16881-4|TRXR1_DROME; sp|Q16881-3|TRXR1_DROME; sp|Q16881-2|TRXR1_DROME	Thioredoxin reductase 1, cytoplasmic OS=Homo sapiens GN=TXNRD1 PE=1 SV=3; Isoform 6 of Thioredoxin reductase 1, cytoplasmic OS=Homo sapiens GN=TXNRD1; Isoform 5 of Thioredoxin reductase 1, cytoplasmic OS=Homo sapiens GN=TXNRD1; Isoform 4 of Thioredoxin reductase 1, cytoplasmic OS=Homo sapiens GN=TXNRD1; Isoform 3 of Thioredoxin reductase 1, cytoplasmic OS=Homo sapiens GN=TXNRD1; Isoform 2 of Thio…	0	99	QFVPIKVEQIEAGTPGR	Gln->pyro-Glu@N-term		missed K-V@6	0.00592903	1851	926.505	1850.99	926.502	2	12	1.1.1.2463.17	43.2477	303018	44218.5	43.12	0.1	2699.11
1	sp|Q16881|TRXR1_DROME; sp|Q16881-6|TRXR1_DROME; sp|Q16881-5|TRXR1_DROME; sp|Q16881-4|TRXR1_DROME; sp|Q16881-3|TRXR1_DROME; sp|Q16881-2|TRXR1_DROME	Thioredoxin reductase 1, cytoplasmic OS=Homo sapiens GN=TXNRD1 PE=1 SV=3; Isoform 6 of Thioredoxin reductase 1, cytoplasmic OS=Homo sapiens GN=TXNRD1; Isoform 5 of Thioredoxin reductase 1, cytoplasmic OS=Homo sapiens GN=TXNRD1; Isoform 4 of Thioredoxin reductase 1, cytoplasmic OS=Homo sapiens GN=TXNRD1; Isoform 3 of Thioredoxin reductase 1, cytoplasmic OS=Homo sapiens GN=TXNRD1; Isoform 2 of Thio…	0	99	QFVPIKVEQIEAGTPGR	Methyl+Deamidated(Q)@1; Oxidation(F)@2	Methyl+Deamidated(Q)@400; Oxidation(F)@401	missed K-V@6	-0.0139343	1899	634.006	1899.01	634.011	3	13	1.1.1.2338.15	37.0873	3301.26	3160.8	37.11	0.15	1922.6
1	sp|Q16881|TRXR1_DROME; sp|Q16881-6|TRXR1_DROME; sp|Q16881-5|TRXR1_DROME; sp|Q16881-4|TRXR1_DROME; sp|Q16881-3|TRXR1_DROME; sp|Q16881-2|TRXR1_DROME	Thioredoxin reductase 1, cytoplasmic OS=Homo sapiens GN=TXNRD1 PE=1 SV=3; Isoform 6 of Thioredoxin reductase 1, cytoplasmic OS=Homo sapiens GN=TXNRD1; Isoform 5 of Thioredoxin reductase 1, cytoplasmic OS=Homo sapiens GN=TXNRD1; Isoform 4 of Thioredoxin reductase 1, cytoplasmic OS=Homo sapiens GN=TXNRD1; Isoform 3 of Thioredoxin reductase 1, cytoplasmic OS=Homo sapiens GN=TXNRD1; Isoform 2 of Thio…	0	99	QLDSTIGIHPVCAEVF	Gln->pyro-Glu@N-term; Carbamidomethyl(C)@12		cleaved F-T@C-term	0.00198548	1767.85	884.933	1767.85	884.932	2	21	1.1.1.2510.13	45.5677	61557.8	58592.3	45.58	0.1	7279.62
1	sp|Q16881|TRXR1_DROME; sp|Q16881-6|TRXR1_DROME; sp|Q16881-5|TRXR1_DROME; sp|Q16881-4|TRXR1_DROME; sp|Q16881-3|TRXR1_DROME; sp|Q16881-2|TRXR1_DROME	Thioredoxin reductase 1, cytoplasmic OS=Homo sapiens GN=TXNRD1 PE=1 SV=3; Isoform 6 of Thioredoxin reductase 1, cytoplasmic OS=Homo sapiens GN=TXNRD1; Isoform 5 of Thioredoxin reductase 1, cytoplasmic OS=Homo sapiens GN=TXNRD1; Isoform 4 of Thioredoxin reductase 1, cytoplasmic OS=Homo sapiens GN=TXNRD1; Isoform 3 of Thioredoxin reductase 1, cytoplasmic OS=Homo sapiens GN=TXNRD1; Isoform 2 of Thio…	0	99	QLDSTIGIHPVCAEVF	Gln->pyro-Glu@N-term; Carbamidomethyl(C)@12		cleaved F-T@C-term	0.00198548	1767.85	884.933	1767.85	884.932	2	10	1.1.1.2512.21	45.675	61557.8	18751.2	45.58	0.1	1214.79
1	sp|Q16881|TRXR1_DROME; sp|Q16881-6|TRXR1_DROME; sp|Q16881-5|TRXR1_DROME; sp|Q16881-4|TRXR1_DROME; sp|Q16881-3|TRXR1_DROME; sp|Q16881-2|TRXR1_DROME	Thioredoxin reductase 1, cytoplasmic OS=Homo sapiens GN=TXNRD1 PE=1 SV=3; Isoform 6 of Thioredoxin reductase 1, cytoplasmic OS=Homo sapiens GN=TXNRD1; Isoform 5 of Thioredoxin reductase 1, cytoplasmic OS=Homo sapiens GN=TXNRD1; Isoform 4 of Thioredoxin reductase 1, cytoplasmic OS=Homo sapiens GN=TXNRD1; Isoform 3 of Thioredoxin reductase 1, cytoplasmic OS=Homo sapiens GN=TXNRD1; Isoform 2 of Thio…	0	99	QLDSTIGIHPVCAEVF	Carbamidomethyl(C)@12		cleaved F-T@C-term	0.0054639	1784.88	893.448	1784.88	893.446	2	25	1.1.1.2463.15	43.2443	243358	231437	43.22	0.1	42459.9
1	sp|Q16881|TRXR1_DROME; sp|Q16881-6|TRXR1_DROME; sp|Q16881-5|TRXR1_DROME; sp|Q16881-4|TRXR1_DROME; sp|Q16881-3|TRXR1_DROME; sp|Q16881-2|TRXR1_DROME	Thioredoxin reductase 1, cytoplasmic OS=Homo sapiens GN=TXNRD1 PE=1 SV=3; Isoform 6 of Thioredoxin reductase 1, cytoplasmic OS=Homo sapiens GN=TXNRD1; Isoform 5 of Thioredoxin reductase 1, cytoplasmic OS=Homo sapiens GN=TXNRD1; Isoform 4 of Thioredoxin reductase 1, cytoplasmic OS=Homo sapiens GN=TXNRD1; Isoform 3 of Thioredoxin reductase 1, cytoplasmic OS=Homo sapiens GN=TXNRD1; Isoform 2 of Thio…	0	99	QLDSTIGIHPVCAEVFTTL	Carbamidomethyl(C)@12		cleaved L-S@C-term	0.000768531	2100.06	1051.04	2100.06	1051.04	2	22	1.1.1.2495.17	44.8441	111413	110337	44.84	0.1	19141.4
1	sp|Q16881|TRXR1_DROME; sp|Q16881-6|TRXR1_DROME; sp|Q16881-5|TRXR1_DROME; sp|Q16881-4|TRXR1_DROME; sp|Q16881-3|TRXR1_DROME; sp|Q16881-2|TRXR1_DROME	Thioredoxin reductase 1, cytoplasmic OS=Homo sapiens GN=TXNRD1 PE=1 SV=3; Isoform 6 of Thioredoxin reductase 1, cytoplasmic OS=Homo sapiens GN=TXNRD1; Isoform 5 of Thioredoxin reductase 1, cytoplasmic OS=Homo sapiens GN=TXNRD1; Isoform 4 of Thioredoxin reductase 1, cytoplasmic OS=Homo sapiens GN=TXNRD1; Isoform 3 of Thioredoxin reductase 1, cytoplasmic OS=Homo sapiens GN=TXNRD1; Isoform 2 of Thio…	0	99	RSGASILQAGC	Carbamidomethyl(C)@11		cleaved C-U@C-term; missed R-S@1	-0.00123995	1118.55	560.282	1118.55	560.282	2	12	1.1.1.2037.17	22.3953	71037.1	28341.3	22.31	0.15	2499.93
1	sp|Q16881|TRXR1_DROME; sp|Q16881-6|TRXR1_DROME; sp|Q16881-5|TRXR1_DROME; sp|Q16881-4|TRXR1_DROME; sp|Q16881-3|TRXR1_DROME; sp|Q16881-2|TRXR1_DROME	Thioredoxin reductase 1, cytoplasmic OS=Homo sapiens GN=TXNRD1 PE=1 SV=3; Isoform 6 of Thioredoxin reductase 1, cytoplasmic OS=Homo sapiens GN=TXNRD1; Isoform 5 of Thioredoxin reductase 1, cytoplasmic OS=Homo sapiens GN=TXNRD1; Isoform 4 of Thioredoxin reductase 1, cytoplasmic OS=Homo sapiens GN=TXNRD1; Isoform 3 of Thioredoxin reductase 1, cytoplasmic OS=Homo sapiens GN=TXNRD1; Isoform 2 of Thio…	0	99	RSGASILQAGC	Carbamidomethyl(C)@11		cleaved C-U@C-term; missed R-S@1	-0.00123995	1118.55	560.282	1118.55	560.282	2	16	1.1.1.2035.15	22.2933	71037.1	69313.6	22.31	0.15	15356.8
1	sp|Q16881|TRXR1_DROME; sp|Q16881-6|TRXR1_DROME; sp|Q16881-5|TRXR1_DROME; sp|Q16881-4|TRXR1_DROME; sp|Q16881-3|TRXR1_DROME; sp|Q16881-2|TRXR1_DROME	Thioredoxin reductase 1, cytoplasmic OS=Homo sapiens GN=TXNRD1 PE=1 SV=3; Isoform 6 of Thioredoxin reductase 1, cytoplasmic OS=Homo sapiens GN=TXNRD1; Isoform 5 of Thioredoxin reductase 1, cytoplasmic OS=Homo sapiens GN=TXNRD1; Isoform 4 of Thioredoxin reductase 1, cytoplasmic OS=Homo sapiens GN=TXNRD1; Isoform 3 of Thioredoxin reductase 1, cytoplasmic OS=Homo sapiens GN=TXNRD1; Isoform 2 of Thio…	0	99	SDDLFSLPYCPGK	Carbamidomethyl(C)@10		cleaved S-S@N-term	0.00062848	1497.68	749.848	1497.68	749.848	2	20	1.1.1.2457.11	42.941	87722.8	87282.6	42.93	0.15	17480.5
1	sp|Q16881|TRXR1_DROME; sp|Q16881-6|TRXR1_DROME; sp|Q16881-5|TRXR1_DROME; sp|Q16881-4|TRXR1_DROME; sp|Q16881-3|TRXR1_DROME; sp|Q16881-2|TRXR1_DROME	Thioredoxin reductase 1, cytoplasmic OS=Homo sapiens GN=TXNRD1 PE=1 SV=3; Isoform 6 of Thioredoxin reductase 1, cytoplasmic OS=Homo sapiens GN=TXNRD1; Isoform 5 of Thioredoxin reductase 1, cytoplasmic OS=Homo sapiens GN=TXNRD1; Isoform 4 of Thioredoxin reductase 1, cytoplasmic OS=Homo sapiens GN=TXNRD1; Isoform 3 of Thioredoxin reductase 1, cytoplasmic OS=Homo sapiens GN=TXNRD1; Isoform 2 of Thio…	0	99	SDDLFSLPYCPGK	Carbamidomethyl(C)@10		cleaved S-S@N-term	0.00062848	1497.68	749.848	1497.68	749.848	2	17	1.1.1.2458.10	42.9885	87722.8	74299	42.93	0.15	10826.2
1	sp|Q16881|TRXR1_DROME; sp|Q16881-6|TRXR1_DROME; sp|Q16881-5|TRXR1_DROME; sp|Q16881-4|TRXR1_DROME; sp|Q16881-3|TRXR1_DROME; sp|Q16881-2|TRXR1_DROME	Thioredoxin reductase 1, cytoplasmic OS=Homo sapiens GN=TXNRD1 PE=1 SV=3; Isoform 6 of Thioredoxin reductase 1, cytoplasmic OS=Homo sapiens GN=TXNRD1; Isoform 5 of Thioredoxin reductase 1, cytoplasmic OS=Homo sapiens GN=TXNRD1; Isoform 4 of Thioredoxin reductase 1, cytoplasmic OS=Homo sapiens GN=TXNRD1; Isoform 3 of Thioredoxin reductase 1, cytoplasmic OS=Homo sapiens GN=TXNRD1; Isoform 2 of Thio…	0	99	SDDLFSLPYCPGK	Carbamidomethyl(C)@10		cleaved S-S@N-term	0.00062848	1497.68	749.848	1497.68	749.848	2	12	1.1.1.2459.11	43.0398	87722.8	35113.7	42.93	0.15	3772.69
1	sp|Q16881|TRXR1_DROME; sp|Q16881-6|TRXR1_DROME; sp|Q16881-5|TRXR1_DROME; sp|Q16881-4|TRXR1_DROME; sp|Q16881-3|TRXR1_DROME; sp|Q16881-2|TRXR1_DROME	Thioredoxin reductase 1, cytoplasmic OS=Homo sapiens GN=TXNRD1 PE=1 SV=3; Isoform 6 of Thioredoxin reductase 1, cytoplasmic OS=Homo sapiens GN=TXNRD1; Isoform 5 of Thioredoxin reductase 1, cytoplasmic OS=Homo sapiens GN=TXNRD1; Isoform 4 of Thioredoxin reductase 1, cytoplasmic OS=Homo sapiens GN=TXNRD1; Isoform 3 of Thioredoxin reductase 1, cytoplasmic OS=Homo sapiens GN=TXNRD1; Isoform 2 of Thio…	0	99	SGASILQAGC	Carbamidomethyl(C)@10		cleaved C-U@C-term	-0.00144878	962.448	482.231	962.449	482.232	2	16	1.1.1.2137.7	27.2149	189298	81860.9	27.35	0.2	13645.2
1	sp|Q16881|TRXR1_DROME; sp|Q16881-6|TRXR1_DROME; sp|Q16881-5|TRXR1_DROME; sp|Q16881-4|TRXR1_DROME; sp|Q16881-3|TRXR1_DROME; sp|Q16881-2|TRXR1_DROME	Thioredoxin reductase 1, cytoplasmic OS=Homo sapiens GN=TXNRD1 PE=1 SV=3; Isoform 6 of Thioredoxin reductase 1, cytoplasmic OS=Homo sapiens GN=TXNRD1; Isoform 5 of Thioredoxin reductase 1, cytoplasmic OS=Homo sapiens GN=TXNRD1; Isoform 4 of Thioredoxin reductase 1, cytoplasmic OS=Homo sapiens GN=TXNRD1; Isoform 3 of Thioredoxin reductase 1, cytoplasmic OS=Homo sapiens GN=TXNRD1; Isoform 2 of Thio…	0	99	SGASILQAGC	Carbamidomethyl(C)@10		cleaved C-U@C-term	-0.00144878	962.448	482.231	962.449	482.232	2	17	1.1.1.2138.10	27.2692	189298	148139	27.35	0.2	46349.5
1	sp|Q16881|TRXR1_DROME; sp|Q16881-6|TRXR1_DROME; sp|Q16881-5|TRXR1_DROME; sp|Q16881-4|TRXR1_DROME; sp|Q16881-3|TRXR1_DROME; sp|Q16881-2|TRXR1_DROME	Thioredoxin reductase 1, cytoplasmic OS=Homo sapiens GN=TXNRD1 PE=1 SV=3; Isoform 6 of Thioredoxin reductase 1, cytoplasmic OS=Homo sapiens GN=TXNRD1; Isoform 5 of Thioredoxin reductase 1, cytoplasmic OS=Homo sapiens GN=TXNRD1; Isoform 4 of Thioredoxin reductase 1, cytoplasmic OS=Homo sapiens GN=TXNRD1; Isoform 3 of Thioredoxin reductase 1, cytoplasmic OS=Homo sapiens GN=TXNRD1; Isoform 2 of Thio…	0	99	SGASILQAGC	Carbamidomethyl(C)@10		cleaved C-U@C-term	-0.00144878	962.448	482.231	962.449	482.232	2	17	1.1.1.2140.2	27.3543	189298	186143	27.35	0.2	39659.9
1	sp|Q16881|TRXR1_DROME; sp|Q16881-6|TRXR1_DROME; sp|Q16881-5|TRXR1_DROME; sp|Q16881-4|TRXR1_DROME; sp|Q16881-3|TRXR1_DROME; sp|Q16881-2|TRXR1_DROME	Thioredoxin reductase 1, cytoplasmic OS=Homo sapiens GN=TXNRD1 PE=1 SV=3; Isoform 6 of Thioredoxin reductase 1, cytoplasmic OS=Homo sapiens GN=TXNRD1; Isoform 5 of Thioredoxin reductase 1, cytoplasmic OS=Homo sapiens GN=TXNRD1; Isoform 4 of Thioredoxin reductase 1, cytoplasmic OS=Homo sapiens GN=TXNRD1; Isoform 3 of Thioredoxin reductase 1, cytoplasmic OS=Homo sapiens GN=TXNRD1; Isoform 2 of Thio…	0	99	SGASILQAGC	Carbamidomethyl(C)@10		cleaved C-U@C-term	-0.00144878	962.448	482.231	962.449	482.232	2	15	1.1.1.2143.4	27.5102	189298	46682.7	27.35	0.2	2100.42
1	sp|Q16881|TRXR1_DROME; sp|Q16881-6|TRXR1_DROME; sp|Q16881-5|TRXR1_DROME; sp|Q16881-4|TRXR1_DROME; sp|Q16881-3|TRXR1_DROME; sp|Q16881-2|TRXR1_DROME	Thioredoxin reductase 1, cytoplasmic OS=Homo sapiens GN=TXNRD1 PE=1 SV=3; Isoform 6 of Thioredoxin reductase 1, cytoplasmic OS=Homo sapiens GN=TXNRD1; Isoform 5 of Thioredoxin reductase 1, cytoplasmic OS=Homo sapiens GN=TXNRD1; Isoform 4 of Thioredoxin reductase 1, cytoplasmic OS=Homo sapiens GN=TXNRD1; Isoform 3 of Thioredoxin reductase 1, cytoplasmic OS=Homo sapiens GN=TXNRD1; Isoform 2 of Thio…	0	99	SGASILQAGC	Carbamidomethyl(C)@10		cleaved C-U@C-term	-0.00144878	962.448	482.231	962.449	482.232	2	17	1.1.1.2141.2	27.4052	189298	144716	27.35	0.2	28301.1
1	sp|Q16881|TRXR1_DROME; sp|Q16881-6|TRXR1_DROME; sp|Q16881-5|TRXR1_DROME; sp|Q16881-4|TRXR1_DROME; sp|Q16881-3|TRXR1_DROME; sp|Q16881-2|TRXR1_DROME	Thioredoxin reductase 1, cytoplasmic OS=Homo sapiens GN=TXNRD1 PE=1 SV=3; Isoform 6 of Thioredoxin reductase 1, cytoplasmic OS=Homo sapiens GN=TXNRD1; Isoform 5 of Thioredoxin reductase 1, cytoplasmic OS=Homo sapiens GN=TXNRD1; Isoform 4 of Thioredoxin reductase 1, cytoplasmic OS=Homo sapiens GN=TXNRD1; Isoform 3 of Thioredoxin reductase 1, cytoplasmic OS=Homo sapiens GN=TXNRD1; Isoform 2 of Thio…	0	99	SGASILQAGC	Carbamidomethyl(C)@10		cleaved C-U@C-term	-0.00144878	962.448	482.231	962.449	482.232	2	17	1.1.1.2139.4	27.3084	189298	183843	27.35	0.2	53850.2
1	sp|Q16881|TRXR1_DROME; sp|Q16881-6|TRXR1_DROME; sp|Q16881-5|TRXR1_DROME; sp|Q16881-4|TRXR1_DROME; sp|Q16881-3|TRXR1_DROME; sp|Q16881-2|TRXR1_DROME	Thioredoxin reductase 1, cytoplasmic OS=Homo sapiens GN=TXNRD1 PE=1 SV=3; Isoform 6 of Thioredoxin reductase 1, cytoplasmic OS=Homo sapiens GN=TXNRD1; Isoform 5 of Thioredoxin reductase 1, cytoplasmic OS=Homo sapiens GN=TXNRD1; Isoform 4 of Thioredoxin reductase 1, cytoplasmic OS=Homo sapiens GN=TXNRD1; Isoform 3 of Thioredoxin reductase 1, cytoplasmic OS=Homo sapiens GN=TXNRD1; Isoform 2 of Thio…	0	99	SGASILQAGC	Carbamidomethyl(C)@10		cleaved C-U@C-term	-0.00144878	962.448	482.231	962.449	482.232	2	14	1.1.1.2140.3	27.3559	189298	184844	27.35	0.2	10769.7
1	sp|Q16881|TRXR1_DROME; sp|Q16881-6|TRXR1_DROME; sp|Q16881-5|TRXR1_DROME; sp|Q16881-4|TRXR1_DROME; sp|Q16881-3|TRXR1_DROME; sp|Q16881-2|TRXR1_DROME	Thioredoxin reductase 1, cytoplasmic OS=Homo sapiens GN=TXNRD1 PE=1 SV=3; Isoform 6 of Thioredoxin reductase 1, cytoplasmic OS=Homo sapiens GN=TXNRD1; Isoform 5 of Thioredoxin reductase 1, cytoplasmic OS=Homo sapiens GN=TXNRD1; Isoform 4 of Thioredoxin reductase 1, cytoplasmic OS=Homo sapiens GN=TXNRD1; Isoform 3 of Thioredoxin reductase 1, cytoplasmic OS=Homo sapiens GN=TXNRD1; Isoform 2 of Thio…	0	99	SYDYDLIIIGGGSGGLAAAK				-0.000705294	1939.99	971.001	1939.99	971.002	2	25	1.1.1.2476.19	43.8938	331630	246469	43.96	0.1	4322.32
1	sp|Q16881|TRXR1_DROME; sp|Q16881-6|TRXR1_DROME; sp|Q16881-5|TRXR1_DROME; sp|Q16881-4|TRXR1_DROME; sp|Q16881-3|TRXR1_DROME; sp|Q16881-2|TRXR1_DROME	Thioredoxin reductase 1, cytoplasmic OS=Homo sapiens GN=TXNRD1 PE=1 SV=3; Isoform 6 of Thioredoxin reductase 1, cytoplasmic OS=Homo sapiens GN=TXNRD1; Isoform 5 of Thioredoxin reductase 1, cytoplasmic OS=Homo sapiens GN=TXNRD1; Isoform 4 of Thioredoxin reductase 1, cytoplasmic OS=Homo sapiens GN=TXNRD1; Isoform 3 of Thioredoxin reductase 1, cytoplasmic OS=Homo sapiens GN=TXNRD1; Isoform 2 of Thio…	0	99	SYDYDLIIIGGGSGGLAAAK				-0.000705294	1939.99	971.001	1939.99	971.002	2	28	1.1.1.2476.20	43.8954	331630	250683	43.96	0.1	51650.3
1	sp|Q16881|TRXR1_DROME; sp|Q16881-6|TRXR1_DROME; sp|Q16881-5|TRXR1_DROME; sp|Q16881-4|TRXR1_DROME; sp|Q16881-3|TRXR1_DROME; sp|Q16881-2|TRXR1_DROME	Thioredoxin reductase 1, cytoplasmic OS=Homo sapiens GN=TXNRD1 PE=1 SV=3; Isoform 6 of Thioredoxin reductase 1, cytoplasmic OS=Homo sapiens GN=TXNRD1; Isoform 5 of Thioredoxin reductase 1, cytoplasmic OS=Homo sapiens GN=TXNRD1; Isoform 4 of Thioredoxin reductase 1, cytoplasmic OS=Homo sapiens GN=TXNRD1; Isoform 3 of Thioredoxin reductase 1, cytoplasmic OS=Homo sapiens GN=TXNRD1; Isoform 2 of Thio…	0	99	SYDYDLIIIGGGSGGLAAAK				-0.000705294	1939.99	971.001	1939.99	971.002	2	28	1.1.1.2477.22	43.9485	331630	321463	43.96	0.1	53327.9
1	sp|Q16881|TRXR1_DROME; sp|Q16881-6|TRXR1_DROME; sp|Q16881-5|TRXR1_DROME; sp|Q16881-4|TRXR1_DROME; sp|Q16881-3|TRXR1_DROME; sp|Q16881-2|TRXR1_DROME	Thioredoxin reductase 1, cytoplasmic OS=Homo sapiens GN=TXNRD1 PE=1 SV=3; Isoform 6 of Thioredoxin reductase 1, cytoplasmic OS=Homo sapiens GN=TXNRD1; Isoform 5 of Thioredoxin reductase 1, cytoplasmic OS=Homo sapiens GN=TXNRD1; Isoform 4 of Thioredoxin reductase 1, cytoplasmic OS=Homo sapiens GN=TXNRD1; Isoform 3 of Thioredoxin reductase 1, cytoplasmic OS=Homo sapiens GN=TXNRD1; Isoform 2 of Thio…	0	99	SYDYDLIIIGGGSGGLAAAK				-0.000705294	1939.99	971.001	1939.99	971.002	2	25	1.1.1.2478.21	43.9961	331630	259816	43.96	0.1	29281.2
1	sp|Q16881|TRXR1_DROME; sp|Q16881-6|TRXR1_DROME; sp|Q16881-5|TRXR1_DROME; sp|Q16881-4|TRXR1_DROME; sp|Q16881-3|TRXR1_DROME; sp|Q16881-2|TRXR1_DROME	Thioredoxin reductase 1, cytoplasmic OS=Homo sapiens GN=TXNRD1 PE=1 SV=3; Isoform 6 of Thioredoxin reductase 1, cytoplasmic OS=Homo sapiens GN=TXNRD1; Isoform 5 of Thioredoxin reductase 1, cytoplasmic OS=Homo sapiens GN=TXNRD1; Isoform 4 of Thioredoxin reductase 1, cytoplasmic OS=Homo sapiens GN=TXNRD1; Isoform 3 of Thioredoxin reductase 1, cytoplasmic OS=Homo sapiens GN=TXNRD1; Isoform 2 of Thio…	0	99	SYDYDLIIIGGGSGGLAAAK				0.000880049	1939.99	647.671	1939.99	647.67	3	23	1.1.1.2480.5	44.0688	154860	74951	43.96	0.15	9280.35
1	sp|Q16881|TRXR1_DROME; sp|Q16881-6|TRXR1_DROME; sp|Q16881-5|TRXR1_DROME; sp|Q16881-4|TRXR1_DROME; sp|Q16881-3|TRXR1_DROME; sp|Q16881-2|TRXR1_DROME	Thioredoxin reductase 1, cytoplasmic OS=Homo sapiens GN=TXNRD1 PE=1 SV=3; Isoform 6 of Thioredoxin reductase 1, cytoplasmic OS=Homo sapiens GN=TXNRD1; Isoform 5 of Thioredoxin reductase 1, cytoplasmic OS=Homo sapiens GN=TXNRD1; Isoform 4 of Thioredoxin reductase 1, cytoplasmic OS=Homo sapiens GN=TXNRD1; Isoform 3 of Thioredoxin reductase 1, cytoplasmic OS=Homo sapiens GN=TXNRD1; Isoform 2 of Thio…	0	99	SYDYDLIIIGGGSGGLAAAK				-0.000705294	1939.99	971.001	1939.99	971.002	2	26	1.1.1.2480.14	44.0871	331630	115821	43.96	0.1	15733.7
1	sp|Q16881|TRXR1_DROME; sp|Q16881-6|TRXR1_DROME; sp|Q16881-5|TRXR1_DROME; sp|Q16881-4|TRXR1_DROME; sp|Q16881-3|TRXR1_DROME; sp|Q16881-2|TRXR1_DROME	Thioredoxin reductase 1, cytoplasmic OS=Homo sapiens GN=TXNRD1 PE=1 SV=3; Isoform 6 of Thioredoxin reductase 1, cytoplasmic OS=Homo sapiens GN=TXNRD1; Isoform 5 of Thioredoxin reductase 1, cytoplasmic OS=Homo sapiens GN=TXNRD1; Isoform 4 of Thioredoxin reductase 1, cytoplasmic OS=Homo sapiens GN=TXNRD1; Isoform 3 of Thioredoxin reductase 1, cytoplasmic OS=Homo sapiens GN=TXNRD1; Isoform 2 of Thio…	0	99	SYDYDLIIIGGGSGGLAAAK				-0.000705294	1939.99	971.001	1939.99	971.002	2	24	1.1.1.2481.19	44.1414	331630	79364.5	43.96	0.1	9127.36
1	sp|Q16881|TRXR1_DROME; sp|Q16881-6|TRXR1_DROME; sp|Q16881-5|TRXR1_DROME; sp|Q16881-4|TRXR1_DROME; sp|Q16881-3|TRXR1_DROME; sp|Q16881-2|TRXR1_DROME	Thioredoxin reductase 1, cytoplasmic OS=Homo sapiens GN=TXNRD1 PE=1 SV=3; Isoform 6 of Thioredoxin reductase 1, cytoplasmic OS=Homo sapiens GN=TXNRD1; Isoform 5 of Thioredoxin reductase 1, cytoplasmic OS=Homo sapiens GN=TXNRD1; Isoform 4 of Thioredoxin reductase 1, cytoplasmic OS=Homo sapiens GN=TXNRD1; Isoform 3 of Thioredoxin reductase 1, cytoplasmic OS=Homo sapiens GN=TXNRD1; Isoform 2 of Thio…	0	99	SYDYDLIIIGGGSGGLAAAK				0.000880049	1939.99	647.671	1939.99	647.67	3	19	1.1.1.2483.6	44.2183	154860	28091.4	43.96	0.15	32062.5
1	sp|Q16881|TRXR1_DROME; sp|Q16881-6|TRXR1_DROME; sp|Q16881-5|TRXR1_DROME; sp|Q16881-4|TRXR1_DROME; sp|Q16881-3|TRXR1_DROME; sp|Q16881-2|TRXR1_DROME	Thioredoxin reductase 1, cytoplasmic OS=Homo sapiens GN=TXNRD1 PE=1 SV=3; Isoform 6 of Thioredoxin reductase 1, cytoplasmic OS=Homo sapiens GN=TXNRD1; Isoform 5 of Thioredoxin reductase 1, cytoplasmic OS=Homo sapiens GN=TXNRD1; Isoform 4 of Thioredoxin reductase 1, cytoplasmic OS=Homo sapiens GN=TXNRD1; Isoform 3 of Thioredoxin reductase 1, cytoplasmic OS=Homo sapiens GN=TXNRD1; Isoform 2 of Thio…	0	99	SYDYDLIIIGGGSGGLAAAK				0.000880049	1939.99	647.671	1939.99	647.67	3	18	1.1.1.2484.5	44.2661	154860	28405.5	43.96	0.15	12378.3
1	sp|Q16881|TRXR1_DROME; sp|Q16881-6|TRXR1_DROME; sp|Q16881-5|TRXR1_DROME; sp|Q16881-4|TRXR1_DROME; sp|Q16881-3|TRXR1_DROME; sp|Q16881-2|TRXR1_DROME	Thioredoxin reductase 1, cytoplasmic OS=Homo sapiens GN=TXNRD1 PE=1 SV=3; Isoform 6 of Thioredoxin reductase 1, cytoplasmic OS=Homo sapiens GN=TXNRD1; Isoform 5 of Thioredoxin reductase 1, cytoplasmic OS=Homo sapiens GN=TXNRD1; Isoform 4 of Thioredoxin reductase 1, cytoplasmic OS=Homo sapiens GN=TXNRD1; Isoform 3 of Thioredoxin reductase 1, cytoplasmic OS=Homo sapiens GN=TXNRD1; Isoform 2 of Thio…	0	99	SYDYDLIIIGGGSGGLAAAK				0.00198025	1939.99	971.003	1939.99	971.002	2	14	1.1.1.2543.24	47.2124	8177.68	6357.74	46.88	0.54	1565.74
1	sp|Q16881|TRXR1_DROME; sp|Q16881-6|TRXR1_DROME; sp|Q16881-5|TRXR1_DROME; sp|Q16881-4|TRXR1_DROME; sp|Q16881-3|TRXR1_DROME; sp|Q16881-2|TRXR1_DROME	Thioredoxin reductase 1, cytoplasmic OS=Homo sapiens GN=TXNRD1 PE=1 SV=3; Isoform 6 of Thioredoxin reductase 1, cytoplasmic OS=Homo sapiens GN=TXNRD1; Isoform 5 of Thioredoxin reductase 1, cytoplasmic OS=Homo sapiens GN=TXNRD1; Isoform 4 of Thioredoxin reductase 1, cytoplasmic OS=Homo sapiens GN=TXNRD1; Isoform 3 of Thioredoxin reductase 1, cytoplasmic OS=Homo sapiens GN=TXNRD1; Isoform 2 of Thio…	0	99	SYDYDLIIIGGGSGGLAAAK				0.0365856	1940.03	647.683	1939.99	647.67	3	12	1.1.1.2546.2	47.325	7624	7347.01	47.32	0.15	1402.56
1	sp|Q16881|TRXR1_DROME; sp|Q16881-6|TRXR1_DROME; sp|Q16881-5|TRXR1_DROME; sp|Q16881-4|TRXR1_DROME; sp|Q16881-3|TRXR1_DROME; sp|Q16881-2|TRXR1_DROME	Thioredoxin reductase 1, cytoplasmic OS=Homo sapiens GN=TXNRD1 PE=1 SV=3; Isoform 6 of Thioredoxin reductase 1, cytoplasmic OS=Homo sapiens GN=TXNRD1; Isoform 5 of Thioredoxin reductase 1, cytoplasmic OS=Homo sapiens GN=TXNRD1; Isoform 4 of Thioredoxin reductase 1, cytoplasmic OS=Homo sapiens GN=TXNRD1; Isoform 3 of Thioredoxin reductase 1, cytoplasmic OS=Homo sapiens GN=TXNRD1; Isoform 2 of Thio…	0	99	SYDYDLIIIGGGSGGLAAAK				0.00234646	1939.99	971.003	1939.99	971.002	2	14	1.1.1.2576.23	48.7537	4055.17	3071.19	48.92	0.99	887.523
1	sp|Q16881|TRXR1_DROME; sp|Q16881-6|TRXR1_DROME; sp|Q16881-5|TRXR1_DROME; sp|Q16881-4|TRXR1_DROME; sp|Q16881-3|TRXR1_DROME; sp|Q16881-2|TRXR1_DROME	Thioredoxin reductase 1, cytoplasmic OS=Homo sapiens GN=TXNRD1 PE=1 SV=3; Isoform 6 of Thioredoxin reductase 1, cytoplasmic OS=Homo sapiens GN=TXNRD1; Isoform 5 of Thioredoxin reductase 1, cytoplasmic OS=Homo sapiens GN=TXNRD1; Isoform 4 of Thioredoxin reductase 1, cytoplasmic OS=Homo sapiens GN=TXNRD1; Isoform 3 of Thioredoxin reductase 1, cytoplasmic OS=Homo sapiens GN=TXNRD1; Isoform 2 of Thio…	0	99	SYDYDLIIIGGGSGGLAAAK				0.000330733	1939.99	647.67	1939.99	647.67	3	12	1.1.1.2582.6	49.0242	3613.22	3325.01	48.96	0.84	620.654
1	sp|Q16881|TRXR1_DROME; sp|Q16881-6|TRXR1_DROME; sp|Q16881-5|TRXR1_DROME; sp|Q16881-4|TRXR1_DROME; sp|Q16881-3|TRXR1_DROME; sp|Q16881-2|TRXR1_DROME	Thioredoxin reductase 1, cytoplasmic OS=Homo sapiens GN=TXNRD1 PE=1 SV=3; Isoform 6 of Thioredoxin reductase 1, cytoplasmic OS=Homo sapiens GN=TXNRD1; Isoform 5 of Thioredoxin reductase 1, cytoplasmic OS=Homo sapiens GN=TXNRD1; Isoform 4 of Thioredoxin reductase 1, cytoplasmic OS=Homo sapiens GN=TXNRD1; Isoform 3 of Thioredoxin reductase 1, cytoplasmic OS=Homo sapiens GN=TXNRD1; Isoform 2 of Thio…	0	99	SYDYDLIIIGGGSGGLAAAK				0.00234646	1939.99	971.003	1939.99	971.002	2	17	1.1.1.2597.18	49.7528	3245.05	3224.99	49.76	0.55	1016.45
1	sp|Q16881|TRXR1_DROME; sp|Q16881-6|TRXR1_DROME; sp|Q16881-5|TRXR1_DROME; sp|Q16881-4|TRXR1_DROME; sp|Q16881-3|TRXR1_DROME; sp|Q16881-2|TRXR1_DROME	Thioredoxin reductase 1, cytoplasmic OS=Homo sapiens GN=TXNRD1 PE=1 SV=3; Isoform 6 of Thioredoxin reductase 1, cytoplasmic OS=Homo sapiens GN=TXNRD1; Isoform 5 of Thioredoxin reductase 1, cytoplasmic OS=Homo sapiens GN=TXNRD1; Isoform 4 of Thioredoxin reductase 1, cytoplasmic OS=Homo sapiens GN=TXNRD1; Isoform 3 of Thioredoxin reductase 1, cytoplasmic OS=Homo sapiens GN=TXNRD1; Isoform 2 of Thio…	0	99	SYDYDLIIIGGGSGGLAAAK				0.00234646	1939.99	971.003	1939.99	971.002	2	17	1.1.1.2600.16	49.8993	3245.05	2603.83	49.76	0.55	879.861
1	sp|Q16881|TRXR1_DROME; sp|Q16881-6|TRXR1_DROME; sp|Q16881-5|TRXR1_DROME; sp|Q16881-4|TRXR1_DROME; sp|Q16881-3|TRXR1_DROME; sp|Q16881-2|TRXR1_DROME	Thioredoxin reductase 1, cytoplasmic OS=Homo sapiens GN=TXNRD1 PE=1 SV=3; Isoform 6 of Thioredoxin reductase 1, cytoplasmic OS=Homo sapiens GN=TXNRD1; Isoform 5 of Thioredoxin reductase 1, cytoplasmic OS=Homo sapiens GN=TXNRD1; Isoform 4 of Thioredoxin reductase 1, cytoplasmic OS=Homo sapiens GN=TXNRD1; Isoform 3 of Thioredoxin reductase 1, cytoplasmic OS=Homo sapiens GN=TXNRD1; Isoform 2 of Thio…	0	99	SYDYDLIIIGGGSGGLAAAK				-0.000827365	1939.99	971.001	1939.99	971.002	2	18	1.1.1.2609.12	50.3453	3068.14	2440.08	50.26	0.55	731.578
1	sp|Q16881|TRXR1_DROME; sp|Q16881-6|TRXR1_DROME; sp|Q16881-5|TRXR1_DROME; sp|Q16881-4|TRXR1_DROME; sp|Q16881-3|TRXR1_DROME; sp|Q16881-2|TRXR1_DROME	Thioredoxin reductase 1, cytoplasmic OS=Homo sapiens GN=TXNRD1 PE=1 SV=3; Isoform 6 of Thioredoxin reductase 1, cytoplasmic OS=Homo sapiens GN=TXNRD1; Isoform 5 of Thioredoxin reductase 1, cytoplasmic OS=Homo sapiens GN=TXNRD1; Isoform 4 of Thioredoxin reductase 1, cytoplasmic OS=Homo sapiens GN=TXNRD1; Isoform 3 of Thioredoxin reductase 1, cytoplasmic OS=Homo sapiens GN=TXNRD1; Isoform 2 of Thio…	0	99	SYDYDLIIIGGGSGGLAAAK				-0.00333137	1939.99	647.669	1939.99	647.67	3	13	1.1.1.2636.4	51.6731	2448.84	1210.96	51.96	0.65	307.127
1	sp|Q16881|TRXR1_DROME; sp|Q16881-6|TRXR1_DROME; sp|Q16881-5|TRXR1_DROME; sp|Q16881-4|TRXR1_DROME; sp|Q16881-3|TRXR1_DROME; sp|Q16881-2|TRXR1_DROME	Thioredoxin reductase 1, cytoplasmic OS=Homo sapiens GN=TXNRD1 PE=1 SV=3; Isoform 6 of Thioredoxin reductase 1, cytoplasmic OS=Homo sapiens GN=TXNRD1; Isoform 5 of Thioredoxin reductase 1, cytoplasmic OS=Homo sapiens GN=TXNRD1; Isoform 4 of Thioredoxin reductase 1, cytoplasmic OS=Homo sapiens GN=TXNRD1; Isoform 3 of Thioredoxin reductase 1, cytoplasmic OS=Homo sapiens GN=TXNRD1; Isoform 2 of Thio…	0	99	SYDYDLIIIGGGSGGLAAAK				-3.5477e-05	1939.99	647.67	1939.99	647.67	3	12	1.1.1.2658.6	52.7978	1958.21	1495.64	52.61	0.5	376.094
1	sp|Q16881|TRXR1_DROME; sp|Q16881-6|TRXR1_DROME; sp|Q16881-5|TRXR1_DROME; sp|Q16881-4|TRXR1_DROME; sp|Q16881-3|TRXR1_DROME; sp|Q16881-2|TRXR1_DROME	Thioredoxin reductase 1, cytoplasmic OS=Homo sapiens GN=TXNRD1 PE=1 SV=3; Isoform 6 of Thioredoxin reductase 1, cytoplasmic OS=Homo sapiens GN=TXNRD1; Isoform 5 of Thioredoxin reductase 1, cytoplasmic OS=Homo sapiens GN=TXNRD1; Isoform 4 of Thioredoxin reductase 1, cytoplasmic OS=Homo sapiens GN=TXNRD1; Isoform 3 of Thioredoxin reductase 1, cytoplasmic OS=Homo sapiens GN=TXNRD1; Isoform 2 of Thio…	0	99	TGKIPVTDEEQTNVPY			cleaved Y-I@C-term; missed K-I@3	-0.00229876	1789.87	895.943	1789.87	895.944	2	13	1.1.1.2232.26	31.9257	144531	14531.8	31.68	0.2	1817.91
1	sp|Q16881|TRXR1_DROME; sp|Q16881-6|TRXR1_DROME; sp|Q16881-5|TRXR1_DROME; sp|Q16881-4|TRXR1_DROME; sp|Q16881-3|TRXR1_DROME; sp|Q16881-2|TRXR1_DROME	Thioredoxin reductase 1, cytoplasmic OS=Homo sapiens GN=TXNRD1 PE=1 SV=3; Isoform 6 of Thioredoxin reductase 1, cytoplasmic OS=Homo sapiens GN=TXNRD1; Isoform 5 of Thioredoxin reductase 1, cytoplasmic OS=Homo sapiens GN=TXNRD1; Isoform 4 of Thioredoxin reductase 1, cytoplasmic OS=Homo sapiens GN=TXNRD1; Isoform 3 of Thioredoxin reductase 1, cytoplasmic OS=Homo sapiens GN=TXNRD1; Isoform 2 of Thio…	0	99	TGKIPVTDEEQTNVPY			cleaved Y-I@C-term; missed K-I@3	-0.00229876	1789.87	895.943	1789.87	895.944	2	14	1.1.1.2231.25	31.8749	144531	35608.4	31.68	0.2	4589.99
1	sp|Q16881|TRXR1_DROME; sp|Q16881-6|TRXR1_DROME; sp|Q16881-5|TRXR1_DROME; sp|Q16881-4|TRXR1_DROME; sp|Q16881-3|TRXR1_DROME; sp|Q16881-2|TRXR1_DROME	Thioredoxin reductase 1, cytoplasmic OS=Homo sapiens GN=TXNRD1 PE=1 SV=3; Isoform 6 of Thioredoxin reductase 1, cytoplasmic OS=Homo sapiens GN=TXNRD1; Isoform 5 of Thioredoxin reductase 1, cytoplasmic OS=Homo sapiens GN=TXNRD1; Isoform 4 of Thioredoxin reductase 1, cytoplasmic OS=Homo sapiens GN=TXNRD1; Isoform 3 of Thioredoxin reductase 1, cytoplasmic OS=Homo sapiens GN=TXNRD1; Isoform 2 of Thio…	0	99	TGKIPVTDEEQTNVPYIY			cleaved Y-A@C-term; missed K-I@3	0.00226273	2066.02	689.682	2066.02	689.681	3	16	1.1.1.2396.13	39.9423	99230	66047.8	39.87	0.1	9199.69
1	sp|Q16881|TRXR1_DROME; sp|Q16881-6|TRXR1_DROME; sp|Q16881-5|TRXR1_DROME; sp|Q16881-4|TRXR1_DROME; sp|Q16881-3|TRXR1_DROME; sp|Q16881-2|TRXR1_DROME	Thioredoxin reductase 1, cytoplasmic OS=Homo sapiens GN=TXNRD1 PE=1 SV=3; Isoform 6 of Thioredoxin reductase 1, cytoplasmic OS=Homo sapiens GN=TXNRD1; Isoform 5 of Thioredoxin reductase 1, cytoplasmic OS=Homo sapiens GN=TXNRD1; Isoform 4 of Thioredoxin reductase 1, cytoplasmic OS=Homo sapiens GN=TXNRD1; Isoform 3 of Thioredoxin reductase 1, cytoplasmic OS=Homo sapiens GN=TXNRD1; Isoform 2 of Thio…	0	99	TGKIPVTDEEQTNVPYIY			cleaved Y-A@C-term; missed K-I@3	0.00175526	2066.02	1034.02	2066.02	1034.02	2	18	1.1.1.2393.15	39.8158	136101	116714	39.87	0.1	15468.4
1	sp|Q16881|TRXR1_DROME; sp|Q16881-6|TRXR1_DROME; sp|Q16881-5|TRXR1_DROME; sp|Q16881-4|TRXR1_DROME; sp|Q16881-3|TRXR1_DROME; sp|Q16881-2|TRXR1_DROME	Thioredoxin reductase 1, cytoplasmic OS=Homo sapiens GN=TXNRD1 PE=1 SV=3; Isoform 6 of Thioredoxin reductase 1, cytoplasmic OS=Homo sapiens GN=TXNRD1; Isoform 5 of Thioredoxin reductase 1, cytoplasmic OS=Homo sapiens GN=TXNRD1; Isoform 4 of Thioredoxin reductase 1, cytoplasmic OS=Homo sapiens GN=TXNRD1; Isoform 3 of Thioredoxin reductase 1, cytoplasmic OS=Homo sapiens GN=TXNRD1; Isoform 2 of Thio…	0	99	TGKIPVTDEEQTNVPYIY			cleaved Y-A@C-term; missed K-I@3	0.00175526	2066.02	1034.02	2066.02	1034.02	2	19	1.1.1.2394.19	39.8655	136101	134830	39.87	0.1	22580.7
1	sp|Q16881|TRXR1_DROME; sp|Q16881-6|TRXR1_DROME; sp|Q16881-5|TRXR1_DROME; sp|Q16881-4|TRXR1_DROME; sp|Q16881-3|TRXR1_DROME; sp|Q16881-2|TRXR1_DROME	Thioredoxin reductase 1, cytoplasmic OS=Homo sapiens GN=TXNRD1 PE=1 SV=3; Isoform 6 of Thioredoxin reductase 1, cytoplasmic OS=Homo sapiens GN=TXNRD1; Isoform 5 of Thioredoxin reductase 1, cytoplasmic OS=Homo sapiens GN=TXNRD1; Isoform 4 of Thioredoxin reductase 1, cytoplasmic OS=Homo sapiens GN=TXNRD1; Isoform 3 of Thioredoxin reductase 1, cytoplasmic OS=Homo sapiens GN=TXNRD1; Isoform 2 of Thio…	0	99	TGKIPVTDEEQTNVPYIY	Cation:K(E)@10		cleaved Y-A@C-term; missed K-I@3	-0.00742878	2103.97	527	2103.98	527.001	4	10	1.1.1.2395.3	39.878	1314.54	1289.71	39.88	0.15	946.153
1	sp|Q16881|TRXR1_DROME; sp|Q16881-6|TRXR1_DROME; sp|Q16881-5|TRXR1_DROME; sp|Q16881-4|TRXR1_DROME; sp|Q16881-3|TRXR1_DROME; sp|Q16881-2|TRXR1_DROME	Thioredoxin reductase 1, cytoplasmic OS=Homo sapiens GN=TXNRD1 PE=1 SV=3; Isoform 6 of Thioredoxin reductase 1, cytoplasmic OS=Homo sapiens GN=TXNRD1; Isoform 5 of Thioredoxin reductase 1, cytoplasmic OS=Homo sapiens GN=TXNRD1; Isoform 4 of Thioredoxin reductase 1, cytoplasmic OS=Homo sapiens GN=TXNRD1; Isoform 3 of Thioredoxin reductase 1, cytoplasmic OS=Homo sapiens GN=TXNRD1; Isoform 2 of Thio…	0	99	TGKIPVTDEEQTNVPYIYAIGDILEDKVELTPVAIQAGR			missed K-I@3; missed K-V@27	-0.00515308	4255.22	852.052	4255.23	852.053	5	19	1.1.1.2538.11	46.9543	10555.2	9224.61	46.98	0.1	1760.56
1	sp|Q16881|TRXR1_DROME; sp|Q16881-6|TRXR1_DROME; sp|Q16881-5|TRXR1_DROME; sp|Q16881-4|TRXR1_DROME; sp|Q16881-3|TRXR1_DROME; sp|Q16881-2|TRXR1_DROME	Thioredoxin reductase 1, cytoplasmic OS=Homo sapiens GN=TXNRD1 PE=1 SV=3; Isoform 6 of Thioredoxin reductase 1, cytoplasmic OS=Homo sapiens GN=TXNRD1; Isoform 5 of Thioredoxin reductase 1, cytoplasmic OS=Homo sapiens GN=TXNRD1; Isoform 4 of Thioredoxin reductase 1, cytoplasmic OS=Homo sapiens GN=TXNRD1; Isoform 3 of Thioredoxin reductase 1, cytoplasmic OS=Homo sapiens GN=TXNRD1; Isoform 2 of Thio…	0	99	TGKIPVTDEEQTNVPYIYAIGDILEDKVELTPVAIQAGR			missed K-I@3; missed K-V@27	-0.00135608	4255.22	1064.81	4255.23	1064.81	4	31	1.1.1.2539.15	47.0171	32503.5	32410.2	47.01	0.15	13553.4
1	sp|Q16881|TRXR1_DROME; sp|Q16881-6|TRXR1_DROME; sp|Q16881-5|TRXR1_DROME; sp|Q16881-4|TRXR1_DROME; sp|Q16881-3|TRXR1_DROME; sp|Q16881-2|TRXR1_DROME	Thioredoxin reductase 1, cytoplasmic OS=Homo sapiens GN=TXNRD1 PE=1 SV=3; Isoform 6 of Thioredoxin reductase 1, cytoplasmic OS=Homo sapiens GN=TXNRD1; Isoform 5 of Thioredoxin reductase 1, cytoplasmic OS=Homo sapiens GN=TXNRD1; Isoform 4 of Thioredoxin reductase 1, cytoplasmic OS=Homo sapiens GN=TXNRD1; Isoform 3 of Thioredoxin reductase 1, cytoplasmic OS=Homo sapiens GN=TXNRD1; Isoform 2 of Thio…	0	99	TLVVGASYVAL			cleaved L-E@C-term	0.000450626	1091.62	546.819	1091.62	546.819	2	17	1.1.1.2477.2	43.9151	58035.7	53881	43.96	0.15	8945.73
1	sp|Q16881|TRXR1_DROME; sp|Q16881-6|TRXR1_DROME; sp|Q16881-5|TRXR1_DROME; sp|Q16881-4|TRXR1_DROME; sp|Q16881-3|TRXR1_DROME; sp|Q16881-2|TRXR1_DROME	Thioredoxin reductase 1, cytoplasmic OS=Homo sapiens GN=TXNRD1 PE=1 SV=3; Isoform 6 of Thioredoxin reductase 1, cytoplasmic OS=Homo sapiens GN=TXNRD1; Isoform 5 of Thioredoxin reductase 1, cytoplasmic OS=Homo sapiens GN=TXNRD1; Isoform 4 of Thioredoxin reductase 1, cytoplasmic OS=Homo sapiens GN=TXNRD1; Isoform 3 of Thioredoxin reductase 1, cytoplasmic OS=Homo sapiens GN=TXNRD1; Isoform 2 of Thio…	0	99	TLVVGASYVAL			cleaved L-E@C-term	0.000450626	1091.62	546.819	1091.62	546.819	2	15	1.1.1.2478.2	43.9644	58035.7	56467.2	43.96	0.15	7065
1	sp|Q16881|TRXR1_DROME; sp|Q16881-6|TRXR1_DROME; sp|Q16881-5|TRXR1_DROME; sp|Q16881-4|TRXR1_DROME; sp|Q16881-3|TRXR1_DROME; sp|Q16881-2|TRXR1_DROME	Thioredoxin reductase 1, cytoplasmic OS=Homo sapiens GN=TXNRD1 PE=1 SV=3; Isoform 6 of Thioredoxin reductase 1, cytoplasmic OS=Homo sapiens GN=TXNRD1; Isoform 5 of Thioredoxin reductase 1, cytoplasmic OS=Homo sapiens GN=TXNRD1; Isoform 4 of Thioredoxin reductase 1, cytoplasmic OS=Homo sapiens GN=TXNRD1; Isoform 3 of Thioredoxin reductase 1, cytoplasmic OS=Homo sapiens GN=TXNRD1; Isoform 2 of Thio…	0	99	TPLEYGAC	Carbamidomethyl(C)@8		cleaved F-T@N-term; cleaved C-G@C-term	0.00125054	909.391	455.703	909.39	455.702	2	10	1.1.1.2095.6	25.1458	3949.08	3673.52	25.18	0.25	1164.19
1	sp|Q16881|TRXR1_DROME; sp|Q16881-6|TRXR1_DROME; sp|Q16881-5|TRXR1_DROME; sp|Q16881-4|TRXR1_DROME; sp|Q16881-3|TRXR1_DROME; sp|Q16881-2|TRXR1_DROME	Thioredoxin reductase 1, cytoplasmic OS=Homo sapiens GN=TXNRD1 PE=1 SV=3; Isoform 6 of Thioredoxin reductase 1, cytoplasmic OS=Homo sapiens GN=TXNRD1; Isoform 5 of Thioredoxin reductase 1, cytoplasmic OS=Homo sapiens GN=TXNRD1; Isoform 4 of Thioredoxin reductase 1, cytoplasmic OS=Homo sapiens GN=TXNRD1; Isoform 3 of Thioredoxin reductase 1, cytoplasmic OS=Homo sapiens GN=TXNRD1; Isoform 2 of Thio…	0	99	VELTPVAIQ			cleaved Q-A@C-term	0.000604922	968.555	485.285	968.554	485.284	2	11	1.1.1.2351.5	37.7116	2962.95	2827.58	37.7	0.15	556.862
1	sp|Q16881|TRXR1_DROME; sp|Q16881-6|TRXR1_DROME; sp|Q16881-5|TRXR1_DROME; sp|Q16881-4|TRXR1_DROME; sp|Q16881-3|TRXR1_DROME; sp|Q16881-2|TRXR1_DROME	Thioredoxin reductase 1, cytoplasmic OS=Homo sapiens GN=TXNRD1 PE=1 SV=3; Isoform 6 of Thioredoxin reductase 1, cytoplasmic OS=Homo sapiens GN=TXNRD1; Isoform 5 of Thioredoxin reductase 1, cytoplasmic OS=Homo sapiens GN=TXNRD1; Isoform 4 of Thioredoxin reductase 1, cytoplasmic OS=Homo sapiens GN=TXNRD1; Isoform 3 of Thioredoxin reductase 1, cytoplasmic OS=Homo sapiens GN=TXNRD1; Isoform 2 of Thio…	0	99	VELTPVAIQ			cleaved Q-A@C-term	0.000604922	968.555	485.285	968.554	485.284	2	10	1.1.1.2353.5	37.8103	2962.95	1189.96	37.7	0.15	373.946
1	sp|Q16881|TRXR1_DROME; sp|Q16881-6|TRXR1_DROME; sp|Q16881-5|TRXR1_DROME; sp|Q16881-4|TRXR1_DROME; sp|Q16881-3|TRXR1_DROME; sp|Q16881-2|TRXR1_DROME	Thioredoxin reductase 1, cytoplasmic OS=Homo sapiens GN=TXNRD1 PE=1 SV=3; Isoform 6 of Thioredoxin reductase 1, cytoplasmic OS=Homo sapiens GN=TXNRD1; Isoform 5 of Thioredoxin reductase 1, cytoplasmic OS=Homo sapiens GN=TXNRD1; Isoform 4 of Thioredoxin reductase 1, cytoplasmic OS=Homo sapiens GN=TXNRD1; Isoform 3 of Thioredoxin reductase 1, cytoplasmic OS=Homo sapiens GN=TXNRD1; Isoform 2 of Thio…	0	99	VELTPVAIQAGR				-0.000138837	1252.71	627.364	1252.71	627.364	2	18	1.1.1.2252.20	32.9028	52234.4	44860.4	32.87	0.15	9663.5
1	sp|Q16881|TRXR1_DROME; sp|Q16881-6|TRXR1_DROME; sp|Q16881-5|TRXR1_DROME; sp|Q16881-4|TRXR1_DROME; sp|Q16881-3|TRXR1_DROME; sp|Q16881-2|TRXR1_DROME	Thioredoxin reductase 1, cytoplasmic OS=Homo sapiens GN=TXNRD1 PE=1 SV=3; Isoform 6 of Thioredoxin reductase 1, cytoplasmic OS=Homo sapiens GN=TXNRD1; Isoform 5 of Thioredoxin reductase 1, cytoplasmic OS=Homo sapiens GN=TXNRD1; Isoform 4 of Thioredoxin reductase 1, cytoplasmic OS=Homo sapiens GN=TXNRD1; Isoform 3 of Thioredoxin reductase 1, cytoplasmic OS=Homo sapiens GN=TXNRD1; Isoform 2 of Thio…	0	99	VEQIEAGTPGR				0.000426164	1155.59	578.802	1155.59	578.801	2	18	1.1.1.1943.14	17.818	57974	42070.1	17.93	0.2	10612
1	sp|Q16881|TRXR1_DROME; sp|Q16881-6|TRXR1_DROME; sp|Q16881-5|TRXR1_DROME; sp|Q16881-4|TRXR1_DROME; sp|Q16881-3|TRXR1_DROME; sp|Q16881-2|TRXR1_DROME	Thioredoxin reductase 1, cytoplasmic OS=Homo sapiens GN=TXNRD1 PE=1 SV=3; Isoform 6 of Thioredoxin reductase 1, cytoplasmic OS=Homo sapiens GN=TXNRD1; Isoform 5 of Thioredoxin reductase 1, cytoplasmic OS=Homo sapiens GN=TXNRD1; Isoform 4 of Thioredoxin reductase 1, cytoplasmic OS=Homo sapiens GN=TXNRD1; Isoform 3 of Thioredoxin reductase 1, cytoplasmic OS=Homo sapiens GN=TXNRD1; Isoform 2 of Thio…	0	99	VEQIEAGTPGR				0.000426164	1155.59	578.802	1155.59	578.801	2	17	1.1.1.1944.7	17.8589	57974	52987.3	17.93	0.2	11220
1	sp|Q16881|TRXR1_DROME; sp|Q16881-6|TRXR1_DROME; sp|Q16881-5|TRXR1_DROME; sp|Q16881-4|TRXR1_DROME; sp|Q16881-3|TRXR1_DROME; sp|Q16881-2|TRXR1_DROME	Thioredoxin reductase 1, cytoplasmic OS=Homo sapiens GN=TXNRD1 PE=1 SV=3; Isoform 6 of Thioredoxin reductase 1, cytoplasmic OS=Homo sapiens GN=TXNRD1; Isoform 5 of Thioredoxin reductase 1, cytoplasmic OS=Homo sapiens GN=TXNRD1; Isoform 4 of Thioredoxin reductase 1, cytoplasmic OS=Homo sapiens GN=TXNRD1; Isoform 3 of Thioredoxin reductase 1, cytoplasmic OS=Homo sapiens GN=TXNRD1; Isoform 2 of Thio…	0	99	VEQIEAGTPGR				0.000426164	1155.59	578.802	1155.59	578.801	2	18	1.1.1.1945.14	17.9029	57974	57837.8	17.93	0.2	12178.7
1	sp|Q16881|TRXR1_DROME; sp|Q16881-6|TRXR1_DROME; sp|Q16881-5|TRXR1_DROME; sp|Q16881-4|TRXR1_DROME; sp|Q16881-3|TRXR1_DROME; sp|Q16881-2|TRXR1_DROME	Thioredoxin reductase 1, cytoplasmic OS=Homo sapiens GN=TXNRD1 PE=1 SV=3; Isoform 6 of Thioredoxin reductase 1, cytoplasmic OS=Homo sapiens GN=TXNRD1; Isoform 5 of Thioredoxin reductase 1, cytoplasmic OS=Homo sapiens GN=TXNRD1; Isoform 4 of Thioredoxin reductase 1, cytoplasmic OS=Homo sapiens GN=TXNRD1; Isoform 3 of Thioredoxin reductase 1, cytoplasmic OS=Homo sapiens GN=TXNRD1; Isoform 2 of Thio…	0	99	VEQIEAGTPGR				0.000426164	1155.59	578.802	1155.59	578.801	2	18	1.1.1.1946.14	17.952	57974	53225.5	17.93	0.2	13187.5
1	sp|Q16881|TRXR1_DROME; sp|Q16881-6|TRXR1_DROME; sp|Q16881-5|TRXR1_DROME; sp|Q16881-4|TRXR1_DROME; sp|Q16881-3|TRXR1_DROME; sp|Q16881-2|TRXR1_DROME	Thioredoxin reductase 1, cytoplasmic OS=Homo sapiens GN=TXNRD1 PE=1 SV=3; Isoform 6 of Thioredoxin reductase 1, cytoplasmic OS=Homo sapiens GN=TXNRD1; Isoform 5 of Thioredoxin reductase 1, cytoplasmic OS=Homo sapiens GN=TXNRD1; Isoform 4 of Thioredoxin reductase 1, cytoplasmic OS=Homo sapiens GN=TXNRD1; Isoform 3 of Thioredoxin reductase 1, cytoplasmic OS=Homo sapiens GN=TXNRD1; Isoform 2 of Thio…	0	99	VEQIEAGTPGR				0.000426164	1155.59	578.802	1155.59	578.801	2	19	1.1.1.1947.17	18.0175	57974	38834.9	17.93	0.2	7653.37
1	sp|Q16881|TRXR1_DROME; sp|Q16881-6|TRXR1_DROME; sp|Q16881-5|TRXR1_DROME; sp|Q16881-4|TRXR1_DROME; sp|Q16881-3|TRXR1_DROME; sp|Q16881-2|TRXR1_DROME	Thioredoxin reductase 1, cytoplasmic OS=Homo sapiens GN=TXNRD1 PE=1 SV=3; Isoform 6 of Thioredoxin reductase 1, cytoplasmic OS=Homo sapiens GN=TXNRD1; Isoform 5 of Thioredoxin reductase 1, cytoplasmic OS=Homo sapiens GN=TXNRD1; Isoform 4 of Thioredoxin reductase 1, cytoplasmic OS=Homo sapiens GN=TXNRD1; Isoform 3 of Thioredoxin reductase 1, cytoplasmic OS=Homo sapiens GN=TXNRD1; Isoform 2 of Thio…	0	99	VEQIEAGTPGR				0.000426164	1155.59	578.802	1155.59	578.801	2	17	1.1.1.1948.7	18.0632	57974	29440.7	17.93	0.2	6229.21
1	sp|Q16881|TRXR1_DROME; sp|Q16881-6|TRXR1_DROME; sp|Q16881-5|TRXR1_DROME; sp|Q16881-4|TRXR1_DROME; sp|Q16881-3|TRXR1_DROME; sp|Q16881-2|TRXR1_DROME	Thioredoxin reductase 1, cytoplasmic OS=Homo sapiens GN=TXNRD1 PE=1 SV=3; Isoform 6 of Thioredoxin reductase 1, cytoplasmic OS=Homo sapiens GN=TXNRD1; Isoform 5 of Thioredoxin reductase 1, cytoplasmic OS=Homo sapiens GN=TXNRD1; Isoform 4 of Thioredoxin reductase 1, cytoplasmic OS=Homo sapiens GN=TXNRD1; Isoform 3 of Thioredoxin reductase 1, cytoplasmic OS=Homo sapiens GN=TXNRD1; Isoform 2 of Thio…	0	99	VEQIEAGTPGR				0.000426164	1155.59	578.802	1155.59	578.801	2	18	1.1.1.1950.8	18.1613	57974	18360.7	17.93	0.2	4642.08
1	sp|Q16881|TRXR1_DROME; sp|Q16881-6|TRXR1_DROME; sp|Q16881-5|TRXR1_DROME; sp|Q16881-4|TRXR1_DROME; sp|Q16881-3|TRXR1_DROME; sp|Q16881-2|TRXR1_DROME	Thioredoxin reductase 1, cytoplasmic OS=Homo sapiens GN=TXNRD1 PE=1 SV=3; Isoform 6 of Thioredoxin reductase 1, cytoplasmic OS=Homo sapiens GN=TXNRD1; Isoform 5 of Thioredoxin reductase 1, cytoplasmic OS=Homo sapiens GN=TXNRD1; Isoform 4 of Thioredoxin reductase 1, cytoplasmic OS=Homo sapiens GN=TXNRD1; Isoform 3 of Thioredoxin reductase 1, cytoplasmic OS=Homo sapiens GN=TXNRD1; Isoform 2 of Thio…	0	99	VEQIEAGTPGR				0.000426164	1155.59	578.802	1155.59	578.801	2	16	1.1.1.1951.24	18.2139	57974	12827.5	17.93	0.2	2685.68
1	sp|Q16881|TRXR1_DROME; sp|Q16881-6|TRXR1_DROME; sp|Q16881-5|TRXR1_DROME; sp|Q16881-4|TRXR1_DROME; sp|Q16881-3|TRXR1_DROME; sp|Q16881-2|TRXR1_DROME	Thioredoxin reductase 1, cytoplasmic OS=Homo sapiens GN=TXNRD1 PE=1 SV=3; Isoform 6 of Thioredoxin reductase 1, cytoplasmic OS=Homo sapiens GN=TXNRD1; Isoform 5 of Thioredoxin reductase 1, cytoplasmic OS=Homo sapiens GN=TXNRD1; Isoform 4 of Thioredoxin reductase 1, cytoplasmic OS=Homo sapiens GN=TXNRD1; Isoform 3 of Thioredoxin reductase 1, cytoplasmic OS=Homo sapiens GN=TXNRD1; Isoform 2 of Thio…	0	99	VEQIEAGTPGR				0.000426164	1155.59	578.802	1155.59	578.801	2	16	1.1.1.1952.17	18.2564	57974	8350.15	17.93	0.2	1922.81
1	sp|Q16881|TRXR1_DROME; sp|Q16881-6|TRXR1_DROME; sp|Q16881-5|TRXR1_DROME; sp|Q16881-4|TRXR1_DROME; sp|Q16881-3|TRXR1_DROME; sp|Q16881-2|TRXR1_DROME	Thioredoxin reductase 1, cytoplasmic OS=Homo sapiens GN=TXNRD1 PE=1 SV=3; Isoform 6 of Thioredoxin reductase 1, cytoplasmic OS=Homo sapiens GN=TXNRD1; Isoform 5 of Thioredoxin reductase 1, cytoplasmic OS=Homo sapiens GN=TXNRD1; Isoform 4 of Thioredoxin reductase 1, cytoplasmic OS=Homo sapiens GN=TXNRD1; Isoform 3 of Thioredoxin reductase 1, cytoplasmic OS=Homo sapiens GN=TXNRD1; Isoform 2 of Thio…	0	99	VEQIEAGTPGR				0.000426164	1155.59	578.802	1155.59	578.801	2	16	1.1.1.1953.7	18.3007	57974	4976.76	17.93	0.2	1115.63
1	sp|Q16881|TRXR1_DROME; sp|Q16881-6|TRXR1_DROME; sp|Q16881-5|TRXR1_DROME; sp|Q16881-4|TRXR1_DROME; sp|Q16881-3|TRXR1_DROME; sp|Q16881-2|TRXR1_DROME	Thioredoxin reductase 1, cytoplasmic OS=Homo sapiens GN=TXNRD1 PE=1 SV=3; Isoform 6 of Thioredoxin reductase 1, cytoplasmic OS=Homo sapiens GN=TXNRD1; Isoform 5 of Thioredoxin reductase 1, cytoplasmic OS=Homo sapiens GN=TXNRD1; Isoform 4 of Thioredoxin reductase 1, cytoplasmic OS=Homo sapiens GN=TXNRD1; Isoform 3 of Thioredoxin reductase 1, cytoplasmic OS=Homo sapiens GN=TXNRD1; Isoform 2 of Thio…	0	99	VMVLDFVTPTPL	Oxidation(M)@2		cleaved L-G@C-term	-0.00619333	1346.71	674.362	1346.72	674.365	2	12	1.1.1.2525.4	46.293	2820.34	2692.19	46.28	0.15	621.991
1	sp|Q16881|TRXR1_DROME; sp|Q16881-6|TRXR1_DROME; sp|Q16881-5|TRXR1_DROME; sp|Q16881-4|TRXR1_DROME; sp|Q16881-3|TRXR1_DROME; sp|Q16881-2|TRXR1_DROME	Thioredoxin reductase 1, cytoplasmic OS=Homo sapiens GN=TXNRD1 PE=1 SV=3; Isoform 6 of Thioredoxin reductase 1, cytoplasmic OS=Homo sapiens GN=TXNRD1; Isoform 5 of Thioredoxin reductase 1, cytoplasmic OS=Homo sapiens GN=TXNRD1; Isoform 4 of Thioredoxin reductase 1, cytoplasmic OS=Homo sapiens GN=TXNRD1; Isoform 3 of Thioredoxin reductase 1, cytoplasmic OS=Homo sapiens GN=TXNRD1; Isoform 2 of Thio…	0	99	VMVLDFVTPTPL			cleaved L-G@C-term	-0.00270686	1330.72	666.366	1330.72	666.368	2	17	1.1.1.2546.4	47.3283	363113	348484	47.32	0.1	41310.2
1	sp|Q16881|TRXR1_DROME; sp|Q16881-6|TRXR1_DROME; sp|Q16881-5|TRXR1_DROME; sp|Q16881-4|TRXR1_DROME; sp|Q16881-3|TRXR1_DROME; sp|Q16881-2|TRXR1_DROME	Thioredoxin reductase 1, cytoplasmic OS=Homo sapiens GN=TXNRD1 PE=1 SV=3; Isoform 6 of Thioredoxin reductase 1, cytoplasmic OS=Homo sapiens GN=TXNRD1; Isoform 5 of Thioredoxin reductase 1, cytoplasmic OS=Homo sapiens GN=TXNRD1; Isoform 4 of Thioredoxin reductase 1, cytoplasmic OS=Homo sapiens GN=TXNRD1; Isoform 3 of Thioredoxin reductase 1, cytoplasmic OS=Homo sapiens GN=TXNRD1; Isoform 2 of Thio…	0	99	VMVLDFVTPTPL	Cation:Na(D)@5		cleaved L-G@C-term	-0.00141224	1352.7	677.358	1352.7	677.359	2	14	1.1.1.2546.7	47.3333	20565.1	19226.2	47.32	0.1	3558.11
1	sp|Q16881|TRXR1_DROME; sp|Q16881-6|TRXR1_DROME; sp|Q16881-5|TRXR1_DROME; sp|Q16881-4|TRXR1_DROME; sp|Q16881-3|TRXR1_DROME; sp|Q16881-2|TRXR1_DROME	Thioredoxin reductase 1, cytoplasmic OS=Homo sapiens GN=TXNRD1 PE=1 SV=3; Isoform 6 of Thioredoxin reductase 1, cytoplasmic OS=Homo sapiens GN=TXNRD1; Isoform 5 of Thioredoxin reductase 1, cytoplasmic OS=Homo sapiens GN=TXNRD1; Isoform 4 of Thioredoxin reductase 1, cytoplasmic OS=Homo sapiens GN=TXNRD1; Isoform 3 of Thioredoxin reductase 1, cytoplasmic OS=Homo sapiens GN=TXNRD1; Isoform 2 of Thio…	0	99	VMVLDFVTPTPL			cleaved L-G@C-term	-0.00270686	1330.72	666.366	1330.72	666.368	2	16	1.1.1.2547.3	47.3791	363113	232156	47.32	0.1	12144.4
1	sp|Q16881|TRXR1_DROME; sp|Q16881-6|TRXR1_DROME; sp|Q16881-5|TRXR1_DROME; sp|Q16881-4|TRXR1_DROME; sp|Q16881-3|TRXR1_DROME; sp|Q16881-2|TRXR1_DROME	Thioredoxin reductase 1, cytoplasmic OS=Homo sapiens GN=TXNRD1 PE=1 SV=3; Isoform 6 of Thioredoxin reductase 1, cytoplasmic OS=Homo sapiens GN=TXNRD1; Isoform 5 of Thioredoxin reductase 1, cytoplasmic OS=Homo sapiens GN=TXNRD1; Isoform 4 of Thioredoxin reductase 1, cytoplasmic OS=Homo sapiens GN=TXNRD1; Isoform 3 of Thioredoxin reductase 1, cytoplasmic OS=Homo sapiens GN=TXNRD1; Isoform 2 of Thio…	0	99	VMVLDFVTPTPL			cleaved L-G@C-term	-0.00270686	1330.72	666.366	1330.72	666.368	2	13	1.1.1.2548.3	47.4383	363113	53973.1	47.32	0.1	1233.88
1	sp|Q16881|TRXR1_DROME; sp|Q16881-6|TRXR1_DROME; sp|Q16881-5|TRXR1_DROME; sp|Q16881-4|TRXR1_DROME; sp|Q16881-3|TRXR1_DROME; sp|Q16881-2|TRXR1_DROME	Thioredoxin reductase 1, cytoplasmic OS=Homo sapiens GN=TXNRD1 PE=1 SV=3; Isoform 6 of Thioredoxin reductase 1, cytoplasmic OS=Homo sapiens GN=TXNRD1; Isoform 5 of Thioredoxin reductase 1, cytoplasmic OS=Homo sapiens GN=TXNRD1; Isoform 4 of Thioredoxin reductase 1, cytoplasmic OS=Homo sapiens GN=TXNRD1; Isoform 3 of Thioredoxin reductase 1, cytoplasmic OS=Homo sapiens GN=TXNRD1; Isoform 2 of Thio…	0	99	VMVLDFVTPTPLGTR	Oxidation(M)@2			0.000107218	1660.89	831.45	1660.89	831.45	2	13	1.1.1.2479.10	44.0275	12179.6	9347.15	43.96	0.1	1905.11
1	sp|Q16881|TRXR1_DROME; sp|Q16881-6|TRXR1_DROME; sp|Q16881-5|TRXR1_DROME; sp|Q16881-4|TRXR1_DROME; sp|Q16881-3|TRXR1_DROME; sp|Q16881-2|TRXR1_DROME	Thioredoxin reductase 1, cytoplasmic OS=Homo sapiens GN=TXNRD1 PE=1 SV=3; Isoform 6 of Thioredoxin reductase 1, cytoplasmic OS=Homo sapiens GN=TXNRD1; Isoform 5 of Thioredoxin reductase 1, cytoplasmic OS=Homo sapiens GN=TXNRD1; Isoform 4 of Thioredoxin reductase 1, cytoplasmic OS=Homo sapiens GN=TXNRD1; Isoform 3 of Thioredoxin reductase 1, cytoplasmic OS=Homo sapiens GN=TXNRD1; Isoform 2 of Thio…	0	99	VMVLDFVTPTPLGTR				-0.000919107	1644.89	823.452	1644.89	823.453	2	25	1.1.1.2495.10	44.8207	1539489	1431644	44.84	0.1	222424
1	sp|Q16881|TRXR1_DROME; sp|Q16881-6|TRXR1_DROME; sp|Q16881-5|TRXR1_DROME; sp|Q16881-4|TRXR1_DROME; sp|Q16881-3|TRXR1_DROME; sp|Q16881-2|TRXR1_DROME	Thioredoxin reductase 1, cytoplasmic OS=Homo sapiens GN=TXNRD1 PE=1 SV=3; Isoform 6 of Thioredoxin reductase 1, cytoplasmic OS=Homo sapiens GN=TXNRD1; Isoform 5 of Thioredoxin reductase 1, cytoplasmic OS=Homo sapiens GN=TXNRD1; Isoform 4 of Thioredoxin reductase 1, cytoplasmic OS=Homo sapiens GN=TXNRD1; Isoform 3 of Thioredoxin reductase 1, cytoplasmic OS=Homo sapiens GN=TXNRD1; Isoform 2 of Thio…	0	99	VMVLDFVTPTPLGTR	Cation:Na(D)@5			0.00146394	1666.87	556.632	1666.87	556.632	3	14	1.1.1.2496.7	44.8616	12381.9	10980.7	44.84	0.1	2526.23
1	sp|Q16881|TRXR1_DROME; sp|Q16881-6|TRXR1_DROME; sp|Q16881-5|TRXR1_DROME; sp|Q16881-4|TRXR1_DROME; sp|Q16881-3|TRXR1_DROME; sp|Q16881-2|TRXR1_DROME	Thioredoxin reductase 1, cytoplasmic OS=Homo sapiens GN=TXNRD1 PE=1 SV=3; Isoform 6 of Thioredoxin reductase 1, cytoplasmic OS=Homo sapiens GN=TXNRD1; Isoform 5 of Thioredoxin reductase 1, cytoplasmic OS=Homo sapiens GN=TXNRD1; Isoform 4 of Thioredoxin reductase 1, cytoplasmic OS=Homo sapiens GN=TXNRD1; Isoform 3 of Thioredoxin reductase 1, cytoplasmic OS=Homo sapiens GN=TXNRD1; Isoform 2 of Thio…	0	99	VMVLDFVTPTPLGTR				-0.000919107	1644.89	823.452	1644.89	823.453	2	24	1.1.1.2496.19	44.8816	1539489	1108242	44.84	0.1	110606
1	sp|Q16881|TRXR1_DROME; sp|Q16881-6|TRXR1_DROME; sp|Q16881-5|TRXR1_DROME; sp|Q16881-4|TRXR1_DROME; sp|Q16881-3|TRXR1_DROME; sp|Q16881-2|TRXR1_DROME	Thioredoxin reductase 1, cytoplasmic OS=Homo sapiens GN=TXNRD1 PE=1 SV=3; Isoform 6 of Thioredoxin reductase 1, cytoplasmic OS=Homo sapiens GN=TXNRD1; Isoform 5 of Thioredoxin reductase 1, cytoplasmic OS=Homo sapiens GN=TXNRD1; Isoform 4 of Thioredoxin reductase 1, cytoplasmic OS=Homo sapiens GN=TXNRD1; Isoform 3 of Thioredoxin reductase 1, cytoplasmic OS=Homo sapiens GN=TXNRD1; Isoform 2 of Thio…	0	99	VMVLDFVTPTPLGTR				-0.000919107	1644.89	823.452	1644.89	823.453	2	24	1.1.1.2497.10	44.9191	1539489	618912	44.84	0.1	37124.2
1	sp|Q16881|TRXR1_DROME; sp|Q16881-6|TRXR1_DROME; sp|Q16881-5|TRXR1_DROME; sp|Q16881-4|TRXR1_DROME; sp|Q16881-3|TRXR1_DROME; sp|Q16881-2|TRXR1_DROME	Thioredoxin reductase 1, cytoplasmic OS=Homo sapiens GN=TXNRD1 PE=1 SV=3; Isoform 6 of Thioredoxin reductase 1, cytoplasmic OS=Homo sapiens GN=TXNRD1; Isoform 5 of Thioredoxin reductase 1, cytoplasmic OS=Homo sapiens GN=TXNRD1; Isoform 4 of Thioredoxin reductase 1, cytoplasmic OS=Homo sapiens GN=TXNRD1; Isoform 3 of Thioredoxin reductase 1, cytoplasmic OS=Homo sapiens GN=TXNRD1; Isoform 2 of Thio…	0	99	VMVLDFVTPTPLGTR				0.00126262	1644.89	549.305	1644.89	549.304	3	18	1.1.1.2498.2	44.9516	523560	89221.5	44.84	0.1	5125.93
1	sp|Q16881|TRXR1_DROME; sp|Q16881-6|TRXR1_DROME; sp|Q16881-5|TRXR1_DROME; sp|Q16881-4|TRXR1_DROME; sp|Q16881-3|TRXR1_DROME; sp|Q16881-2|TRXR1_DROME	Thioredoxin reductase 1, cytoplasmic OS=Homo sapiens GN=TXNRD1 PE=1 SV=3; Isoform 6 of Thioredoxin reductase 1, cytoplasmic OS=Homo sapiens GN=TXNRD1; Isoform 5 of Thioredoxin reductase 1, cytoplasmic OS=Homo sapiens GN=TXNRD1; Isoform 4 of Thioredoxin reductase 1, cytoplasmic OS=Homo sapiens GN=TXNRD1; Isoform 3 of Thioredoxin reductase 1, cytoplasmic OS=Homo sapiens GN=TXNRD1; Isoform 2 of Thio…	0	99	VMVLDFVTPTPLGTR	Formyl@N-term			0.000572334	1672.89	837.451	1672.89	837.45	2	13	1.1.1.2574.10	48.6461	3830.46	2006.63	48.57	0.1	535.501
1	sp|Q16881|TRXR1_DROME; sp|Q16881-6|TRXR1_DROME; sp|Q16881-5|TRXR1_DROME; sp|Q16881-4|TRXR1_DROME; sp|Q16881-3|TRXR1_DROME; sp|Q16881-2|TRXR1_DROME	Thioredoxin reductase 1, cytoplasmic OS=Homo sapiens GN=TXNRD1 PE=1 SV=3; Isoform 6 of Thioredoxin reductase 1, cytoplasmic OS=Homo sapiens GN=TXNRD1; Isoform 5 of Thioredoxin reductase 1, cytoplasmic OS=Homo sapiens GN=TXNRD1; Isoform 4 of Thioredoxin reductase 1, cytoplasmic OS=Homo sapiens GN=TXNRD1; Isoform 3 of Thioredoxin reductase 1, cytoplasmic OS=Homo sapiens GN=TXNRD1; Isoform 2 of Thio…	0	99	VVAQSTNSEEIIEGEYNTVML			cleaved L-A@C-term	6.89308e-07	2325.1	776.042	2325.1	776.042	3	17	1.1.1.2493.13	44.7236	124751	109530	44.7	0.15	11233.2
1	sp|Q16881|TRXR1_DROME; sp|Q16881-6|TRXR1_DROME; sp|Q16881-5|TRXR1_DROME; sp|Q16881-4|TRXR1_DROME; sp|Q16881-3|TRXR1_DROME; sp|Q16881-2|TRXR1_DROME	Thioredoxin reductase 1, cytoplasmic OS=Homo sapiens GN=TXNRD1 PE=1 SV=3; Isoform 6 of Thioredoxin reductase 1, cytoplasmic OS=Homo sapiens GN=TXNRD1; Isoform 5 of Thioredoxin reductase 1, cytoplasmic OS=Homo sapiens GN=TXNRD1; Isoform 4 of Thioredoxin reductase 1, cytoplasmic OS=Homo sapiens GN=TXNRD1; Isoform 3 of Thioredoxin reductase 1, cytoplasmic OS=Homo sapiens GN=TXNRD1; Isoform 2 of Thio…	0	99	VVGFHVLGPNAGEVTQGF			cleaved F-A@C-term	0.00168168	1826.93	914.474	1826.93	914.473	2	24	1.1.1.2465.19	43.3496	134743	119564	43.37	0.1	16895.8
1	sp|Q16881|TRXR1_DROME; sp|Q16881-6|TRXR1_DROME; sp|Q16881-5|TRXR1_DROME; sp|Q16881-4|TRXR1_DROME; sp|Q16881-3|TRXR1_DROME; sp|Q16881-2|TRXR1_DROME	Thioredoxin reductase 1, cytoplasmic OS=Homo sapiens GN=TXNRD1 PE=1 SV=3; Isoform 6 of Thioredoxin reductase 1, cytoplasmic OS=Homo sapiens GN=TXNRD1; Isoform 5 of Thioredoxin reductase 1, cytoplasmic OS=Homo sapiens GN=TXNRD1; Isoform 4 of Thioredoxin reductase 1, cytoplasmic OS=Homo sapiens GN=TXNRD1; Isoform 3 of Thioredoxin reductase 1, cytoplasmic OS=Homo sapiens GN=TXNRD1; Isoform 2 of Thio…	0	99	VVGFHVLGPNAGEVTQGF			cleaved F-A@C-term	0.00168168	1826.93	914.474	1826.93	914.473	2	24	1.1.1.2466.18	43.3973	134743	131850	43.37	0.1	19264.7
1	sp|Q16881|TRXR1_DROME; sp|Q16881-6|TRXR1_DROME; sp|Q16881-5|TRXR1_DROME; sp|Q16881-4|TRXR1_DROME; sp|Q16881-3|TRXR1_DROME; sp|Q16881-2|TRXR1_DROME	Thioredoxin reductase 1, cytoplasmic OS=Homo sapiens GN=TXNRD1 PE=1 SV=3; Isoform 6 of Thioredoxin reductase 1, cytoplasmic OS=Homo sapiens GN=TXNRD1; Isoform 5 of Thioredoxin reductase 1, cytoplasmic OS=Homo sapiens GN=TXNRD1; Isoform 4 of Thioredoxin reductase 1, cytoplasmic OS=Homo sapiens GN=TXNRD1; Isoform 3 of Thioredoxin reductase 1, cytoplasmic OS=Homo sapiens GN=TXNRD1; Isoform 2 of Thio…	0	99	VVGFHVLGPNAGEVTQGF			cleaved F-A@C-term	0.00168168	1826.93	914.474	1826.93	914.473	2	19	1.1.1.2467.20	43.4498	134743	77274.8	43.37	0.1	4383.26
1	sp|Q16881|TRXR1_DROME; sp|Q16881-6|TRXR1_DROME; sp|Q16881-5|TRXR1_DROME; sp|Q16881-4|TRXR1_DROME; sp|Q16881-3|TRXR1_DROME; sp|Q16881-2|TRXR1_DROME	Thioredoxin reductase 1, cytoplasmic OS=Homo sapiens GN=TXNRD1 PE=1 SV=3; Isoform 6 of Thioredoxin reductase 1, cytoplasmic OS=Homo sapiens GN=TXNRD1; Isoform 5 of Thioredoxin reductase 1, cytoplasmic OS=Homo sapiens GN=TXNRD1; Isoform 4 of Thioredoxin reductase 1, cytoplasmic OS=Homo sapiens GN=TXNRD1; Isoform 3 of Thioredoxin reductase 1, cytoplasmic OS=Homo sapiens GN=TXNRD1; Isoform 2 of Thio…	0	99	VVGFHVLGPNAGEVTQGFAA			cleaved A-A@C-term	0.0040652	1969.01	985.512	1969.01	985.51	2	20	1.1.1.2464.21	43.3036	50469.7	49465.8	43.31	0.1	13771
1	sp|Q16881|TRXR1_DROME; sp|Q16881-6|TRXR1_DROME; sp|Q16881-5|TRXR1_DROME; sp|Q16881-4|TRXR1_DROME; sp|Q16881-3|TRXR1_DROME; sp|Q16881-2|TRXR1_DROME	Thioredoxin reductase 1, cytoplasmic OS=Homo sapiens GN=TXNRD1 PE=1 SV=3; Isoform 6 of Thioredoxin reductase 1, cytoplasmic OS=Homo sapiens GN=TXNRD1; Isoform 5 of Thioredoxin reductase 1, cytoplasmic OS=Homo sapiens GN=TXNRD1; Isoform 4 of Thioredoxin reductase 1, cytoplasmic OS=Homo sapiens GN=TXNRD1; Isoform 3 of Thioredoxin reductase 1, cytoplasmic OS=Homo sapiens GN=TXNRD1; Isoform 2 of Thio…	0	99	VVGFHVLGPNAGEVTQGFAAA			cleaved A-L@C-term	0.00511221	2040.05	681.023	2040.04	681.022	3	12	1.1.1.2467.12	43.4365	17773.5	14775.7	43.41	0.1	2358.95
1	sp|Q16881|TRXR1_DROME; sp|Q16881-6|TRXR1_DROME; sp|Q16881-5|TRXR1_DROME; sp|Q16881-4|TRXR1_DROME; sp|Q16881-3|TRXR1_DROME; sp|Q16881-2|TRXR1_DROME	Thioredoxin reductase 1, cytoplasmic OS=Homo sapiens GN=TXNRD1 PE=1 SV=3; Isoform 6 of Thioredoxin reductase 1, cytoplasmic OS=Homo sapiens GN=TXNRD1; Isoform 5 of Thioredoxin reductase 1, cytoplasmic OS=Homo sapiens GN=TXNRD1; Isoform 4 of Thioredoxin reductase 1, cytoplasmic OS=Homo sapiens GN=TXNRD1; Isoform 3 of Thioredoxin reductase 1, cytoplasmic OS=Homo sapiens GN=TXNRD1; Isoform 2 of Thio…	0	99	VVGFHVLGPNAGEVTQGFAAALK				0.00318303	2281.22	571.313	2281.22	571.313	4	27	1.1.1.2477.4	43.9184	175096	152256	43.96	0.1	43696.8
1	sp|Q16881|TRXR1_DROME; sp|Q16881-6|TRXR1_DROME; sp|Q16881-5|TRXR1_DROME; sp|Q16881-4|TRXR1_DROME; sp|Q16881-3|TRXR1_DROME; sp|Q16881-2|TRXR1_DROME	Thioredoxin reductase 1, cytoplasmic OS=Homo sapiens GN=TXNRD1 PE=1 SV=3; Isoform 6 of Thioredoxin reductase 1, cytoplasmic OS=Homo sapiens GN=TXNRD1; Isoform 5 of Thioredoxin reductase 1, cytoplasmic OS=Homo sapiens GN=TXNRD1; Isoform 4 of Thioredoxin reductase 1, cytoplasmic OS=Homo sapiens GN=TXNRD1; Isoform 3 of Thioredoxin reductase 1, cytoplasmic OS=Homo sapiens GN=TXNRD1; Isoform 2 of Thio…	0	99	VVGFHVLGPNAGEVTQGFAAALK				-0.000269041	2281.22	761.414	2281.22	761.415	3	29	1.1.1.2478.14	43.9845	548354	503090	43.96	0.1	134721
1	sp|Q16881|TRXR1_DROME; sp|Q16881-6|TRXR1_DROME; sp|Q16881-5|TRXR1_DROME; sp|Q16881-4|TRXR1_DROME; sp|Q16881-3|TRXR1_DROME; sp|Q16881-2|TRXR1_DROME	Thioredoxin reductase 1, cytoplasmic OS=Homo sapiens GN=TXNRD1 PE=1 SV=3; Isoform 6 of Thioredoxin reductase 1, cytoplasmic OS=Homo sapiens GN=TXNRD1; Isoform 5 of Thioredoxin reductase 1, cytoplasmic OS=Homo sapiens GN=TXNRD1; Isoform 4 of Thioredoxin reductase 1, cytoplasmic OS=Homo sapiens GN=TXNRD1; Isoform 3 of Thioredoxin reductase 1, cytoplasmic OS=Homo sapiens GN=TXNRD1; Isoform 2 of Thio…	0	99	VVGFHVLGPNAGEVTQGFAAALK	Carbamidomethyl@N-term			0.000684036	2338.24	780.422	2338.24	780.422	3	11	1.1.1.2478.15	43.9861	1884.32	1286.75	43.91	0.15	766.037
1	sp|Q16881|TRXR1_DROME; sp|Q16881-6|TRXR1_DROME; sp|Q16881-5|TRXR1_DROME; sp|Q16881-4|TRXR1_DROME; sp|Q16881-3|TRXR1_DROME; sp|Q16881-2|TRXR1_DROME	Thioredoxin reductase 1, cytoplasmic OS=Homo sapiens GN=TXNRD1 PE=1 SV=3; Isoform 6 of Thioredoxin reductase 1, cytoplasmic OS=Homo sapiens GN=TXNRD1; Isoform 5 of Thioredoxin reductase 1, cytoplasmic OS=Homo sapiens GN=TXNRD1; Isoform 4 of Thioredoxin reductase 1, cytoplasmic OS=Homo sapiens GN=TXNRD1; Isoform 3 of Thioredoxin reductase 1, cytoplasmic OS=Homo sapiens GN=TXNRD1; Isoform 2 of Thio…	0	99	VVGFHVLGPNAGEVTQGFAAALK				-0.000269041	2281.22	761.414	2281.22	761.415	3	28	1.1.1.2479.7	44.0224	548354	378965	43.96	0.1	40722.6
1	sp|Q16881|TRXR1_DROME; sp|Q16881-6|TRXR1_DROME; sp|Q16881-5|TRXR1_DROME; sp|Q16881-4|TRXR1_DROME; sp|Q16881-3|TRXR1_DROME; sp|Q16881-2|TRXR1_DROME	Thioredoxin reductase 1, cytoplasmic OS=Homo sapiens GN=TXNRD1 PE=1 SV=3; Isoform 6 of Thioredoxin reductase 1, cytoplasmic OS=Homo sapiens GN=TXNRD1; Isoform 5 of Thioredoxin reductase 1, cytoplasmic OS=Homo sapiens GN=TXNRD1; Isoform 4 of Thioredoxin reductase 1, cytoplasmic OS=Homo sapiens GN=TXNRD1; Isoform 3 of Thioredoxin reductase 1, cytoplasmic OS=Homo sapiens GN=TXNRD1; Isoform 2 of Thio…	0	99	VVGFHVLGPNAGEVTQGFAAALK	Deamidated(N)@10			0.00246895	2282.21	761.743	2282.21	761.743	3	26	1.1.1.2493.12	44.7219	36367.3	29057.6	44.69	0.15	5288.45
1	sp|Q16881|TRXR1_DROME; sp|Q16881-6|TRXR1_DROME; sp|Q16881-5|TRXR1_DROME; sp|Q16881-4|TRXR1_DROME; sp|Q16881-3|TRXR1_DROME; sp|Q16881-2|TRXR1_DROME	Thioredoxin reductase 1, cytoplasmic OS=Homo sapiens GN=TXNRD1 PE=1 SV=3; Isoform 6 of Thioredoxin reductase 1, cytoplasmic OS=Homo sapiens GN=TXNRD1; Isoform 5 of Thioredoxin reductase 1, cytoplasmic OS=Homo sapiens GN=TXNRD1; Isoform 4 of Thioredoxin reductase 1, cytoplasmic OS=Homo sapiens GN=TXNRD1; Isoform 3 of Thioredoxin reductase 1, cytoplasmic OS=Homo sapiens GN=TXNRD1; Isoform 2 of Thio…	0	99	VVYENAYGQF	Deamidated(N)@5		cleaved F-I@C-term	0.00616709	1189.54	595.775	1189.53	595.772	2	11	1.1.1.2355.14	37.9239	6766.68	6241.29	37.85	0.39	1473.76
1	sp|Q16881|TRXR1_DROME; sp|Q16881-6|TRXR1_DROME; sp|Q16881-5|TRXR1_DROME; sp|Q16881-4|TRXR1_DROME; sp|Q16881-3|TRXR1_DROME; sp|Q16881-2|TRXR1_DROME	Thioredoxin reductase 1, cytoplasmic OS=Homo sapiens GN=TXNRD1 PE=1 SV=3; Isoform 6 of Thioredoxin reductase 1, cytoplasmic OS=Homo sapiens GN=TXNRD1; Isoform 5 of Thioredoxin reductase 1, cytoplasmic OS=Homo sapiens GN=TXNRD1; Isoform 4 of Thioredoxin reductase 1, cytoplasmic OS=Homo sapiens GN=TXNRD1; Isoform 3 of Thioredoxin reductase 1, cytoplasmic OS=Homo sapiens GN=TXNRD1; Isoform 2 of Thio…	0	99	VVYENAYGQFIGPHR				-0.000359313	1748.86	583.962	1748.86	583.962	3	21	1.1.1.2277.6	34.1213	345231	203275	34.2	0.2	44005
1	sp|Q16881|TRXR1_DROME; sp|Q16881-6|TRXR1_DROME; sp|Q16881-5|TRXR1_DROME; sp|Q16881-4|TRXR1_DROME; sp|Q16881-3|TRXR1_DROME; sp|Q16881-2|TRXR1_DROME	Thioredoxin reductase 1, cytoplasmic OS=Homo sapiens GN=TXNRD1 PE=1 SV=3; Isoform 6 of Thioredoxin reductase 1, cytoplasmic OS=Homo sapiens GN=TXNRD1; Isoform 5 of Thioredoxin reductase 1, cytoplasmic OS=Homo sapiens GN=TXNRD1; Isoform 4 of Thioredoxin reductase 1, cytoplasmic OS=Homo sapiens GN=TXNRD1; Isoform 3 of Thioredoxin reductase 1, cytoplasmic OS=Homo sapiens GN=TXNRD1; Isoform 2 of Thio…	0	99	VVYENAYGQFIGPHR				-0.000359313	1748.86	583.962	1748.86	583.962	3	22	1.1.1.2279.6	34.2114	345231	344186	34.2	0.2	88640.9
1	sp|Q16881|TRXR1_DROME; sp|Q16881-6|TRXR1_DROME; sp|Q16881-5|TRXR1_DROME; sp|Q16881-4|TRXR1_DROME; sp|Q16881-3|TRXR1_DROME; sp|Q16881-2|TRXR1_DROME	Thioredoxin reductase 1, cytoplasmic OS=Homo sapiens GN=TXNRD1 PE=1 SV=3; Isoform 6 of Thioredoxin reductase 1, cytoplasmic OS=Homo sapiens GN=TXNRD1; Isoform 5 of Thioredoxin reductase 1, cytoplasmic OS=Homo sapiens GN=TXNRD1; Isoform 4 of Thioredoxin reductase 1, cytoplasmic OS=Homo sapiens GN=TXNRD1; Isoform 3 of Thioredoxin reductase 1, cytoplasmic OS=Homo sapiens GN=TXNRD1; Isoform 2 of Thio…	0	99	VVYENAYGQFIGPHR				-0.000359313	1748.86	583.962	1748.86	583.962	3	22	1.1.1.2283.8	34.4261	345231	130049	34.2	0.2	31010.3
1	sp|Q16881|TRXR1_DROME; sp|Q16881-6|TRXR1_DROME; sp|Q16881-5|TRXR1_DROME; sp|Q16881-4|TRXR1_DROME; sp|Q16881-3|TRXR1_DROME; sp|Q16881-2|TRXR1_DROME	Thioredoxin reductase 1, cytoplasmic OS=Homo sapiens GN=TXNRD1 PE=1 SV=3; Isoform 6 of Thioredoxin reductase 1, cytoplasmic OS=Homo sapiens GN=TXNRD1; Isoform 5 of Thioredoxin reductase 1, cytoplasmic OS=Homo sapiens GN=TXNRD1; Isoform 4 of Thioredoxin reductase 1, cytoplasmic OS=Homo sapiens GN=TXNRD1; Isoform 3 of Thioredoxin reductase 1, cytoplasmic OS=Homo sapiens GN=TXNRD1; Isoform 2 of Thio…	0	99	VVYENAYGQFIGPHR				-0.000359313	1748.86	583.962	1748.86	583.962	3	19	1.1.1.2284.11	34.4654	345231	90069.5	34.2	0.2	18839.5
1	sp|Q16881|TRXR1_DROME; sp|Q16881-6|TRXR1_DROME; sp|Q16881-5|TRXR1_DROME; sp|Q16881-4|TRXR1_DROME; sp|Q16881-3|TRXR1_DROME; sp|Q16881-2|TRXR1_DROME	Thioredoxin reductase 1, cytoplasmic OS=Homo sapiens GN=TXNRD1 PE=1 SV=3; Isoform 6 of Thioredoxin reductase 1, cytoplasmic OS=Homo sapiens GN=TXNRD1; Isoform 5 of Thioredoxin reductase 1, cytoplasmic OS=Homo sapiens GN=TXNRD1; Isoform 4 of Thioredoxin reductase 1, cytoplasmic OS=Homo sapiens GN=TXNRD1; Isoform 3 of Thioredoxin reductase 1, cytoplasmic OS=Homo sapiens GN=TXNRD1; Isoform 2 of Thio…	0	99	VVYENAYGQFIGPHR				-0.000359313	1748.86	583.962	1748.86	583.962	3	21	1.1.1.2285.16	34.5232	345231	48570.5	34.2	0.2	9247.65
1	sp|Q16881|TRXR1_DROME; sp|Q16881-6|TRXR1_DROME; sp|Q16881-5|TRXR1_DROME; sp|Q16881-4|TRXR1_DROME; sp|Q16881-3|TRXR1_DROME; sp|Q16881-2|TRXR1_DROME	Thioredoxin reductase 1, cytoplasmic OS=Homo sapiens GN=TXNRD1 PE=1 SV=3; Isoform 6 of Thioredoxin reductase 1, cytoplasmic OS=Homo sapiens GN=TXNRD1; Isoform 5 of Thioredoxin reductase 1, cytoplasmic OS=Homo sapiens GN=TXNRD1; Isoform 4 of Thioredoxin reductase 1, cytoplasmic OS=Homo sapiens GN=TXNRD1; Isoform 3 of Thioredoxin reductase 1, cytoplasmic OS=Homo sapiens GN=TXNRD1; Isoform 2 of Thio…	0	99	VVYENAYGQFIGPHR				-0.000359313	1748.86	583.962	1748.86	583.962	3	19	1.1.1.2286.13	34.5676	345231	27943.5	34.2	0.2	4980.05
1	sp|Q16881|TRXR1_DROME; sp|Q16881-6|TRXR1_DROME; sp|Q16881-5|TRXR1_DROME; sp|Q16881-4|TRXR1_DROME; sp|Q16881-3|TRXR1_DROME; sp|Q16881-2|TRXR1_DROME	Thioredoxin reductase 1, cytoplasmic OS=Homo sapiens GN=TXNRD1 PE=1 SV=3; Isoform 6 of Thioredoxin reductase 1, cytoplasmic OS=Homo sapiens GN=TXNRD1; Isoform 5 of Thioredoxin reductase 1, cytoplasmic OS=Homo sapiens GN=TXNRD1; Isoform 4 of Thioredoxin reductase 1, cytoplasmic OS=Homo sapiens GN=TXNRD1; Isoform 3 of Thioredoxin reductase 1, cytoplasmic OS=Homo sapiens GN=TXNRD1; Isoform 2 of Thio…	0	99	VVYENAYGQFIGPHR	Deamidated(N)@5			-0.000182768	1749.85	584.29	1749.85	584.29	3	16	1.1.1.2315.5	35.9823	19806.5	18233.9	36.02	0.15	6171.5
1	sp|Q16881|TRXR1_DROME; sp|Q16881-6|TRXR1_DROME; sp|Q16881-5|TRXR1_DROME; sp|Q16881-4|TRXR1_DROME; sp|Q16881-3|TRXR1_DROME; sp|Q16881-2|TRXR1_DROME	Thioredoxin reductase 1, cytoplasmic OS=Homo sapiens GN=TXNRD1 PE=1 SV=3; Isoform 6 of Thioredoxin reductase 1, cytoplasmic OS=Homo sapiens GN=TXNRD1; Isoform 5 of Thioredoxin reductase 1, cytoplasmic OS=Homo sapiens GN=TXNRD1; Isoform 4 of Thioredoxin reductase 1, cytoplasmic OS=Homo sapiens GN=TXNRD1; Isoform 3 of Thioredoxin reductase 1, cytoplasmic OS=Homo sapiens GN=TXNRD1; Isoform 2 of Thio…	0	99	VVYENAYGQFIGPHR	Carbamidomethyl(H)@14			-0.000570115	1805.88	602.969	1805.88	602.969	3	13	1.1.1.2274.11	33.9738	5001.83	4767.98	33.96	0.15	1428.86
1	sp|Q16881|TRXR1_DROME; sp|Q16881-6|TRXR1_DROME; sp|Q16881-5|TRXR1_DROME; sp|Q16881-4|TRXR1_DROME; sp|Q16881-3|TRXR1_DROME; sp|Q16881-2|TRXR1_DROME	Thioredoxin reductase 1, cytoplasmic OS=Homo sapiens GN=TXNRD1 PE=1 SV=3; Isoform 6 of Thioredoxin reductase 1, cytoplasmic OS=Homo sapiens GN=TXNRD1; Isoform 5 of Thioredoxin reductase 1, cytoplasmic OS=Homo sapiens GN=TXNRD1; Isoform 4 of Thioredoxin reductase 1, cytoplasmic OS=Homo sapiens GN=TXNRD1; Isoform 3 of Thioredoxin reductase 1, cytoplasmic OS=Homo sapiens GN=TXNRD1; Isoform 2 of Thio…	0	99	VVYENAYGQFIGPHR				-0.000359313	1748.86	583.962	1748.86	583.962	3	23	1.1.1.2281.5	34.3147	345231	260931	34.2	0.2	72406.5
1	sp|Q16881|TRXR1_DROME; sp|Q16881-6|TRXR1_DROME; sp|Q16881-5|TRXR1_DROME; sp|Q16881-4|TRXR1_DROME; sp|Q16881-3|TRXR1_DROME; sp|Q16881-2|TRXR1_DROME	Thioredoxin reductase 1, cytoplasmic OS=Homo sapiens GN=TXNRD1 PE=1 SV=3; Isoform 6 of Thioredoxin reductase 1, cytoplasmic OS=Homo sapiens GN=TXNRD1; Isoform 5 of Thioredoxin reductase 1, cytoplasmic OS=Homo sapiens GN=TXNRD1; Isoform 4 of Thioredoxin reductase 1, cytoplasmic OS=Homo sapiens GN=TXNRD1; Isoform 3 of Thioredoxin reductase 1, cytoplasmic OS=Homo sapiens GN=TXNRD1; Isoform 2 of Thio…	0	99	VVYENAYGQFIGPHR				-0.000359313	1748.86	583.962	1748.86	583.962	3	23	1.1.1.2282.4	34.3706	345231	196606	34.2	0.2	52647.9
1	sp|Q16881|TRXR1_DROME; sp|Q16881-6|TRXR1_DROME; sp|Q16881-5|TRXR1_DROME; sp|Q16881-4|TRXR1_DROME; sp|Q16881-3|TRXR1_DROME; sp|Q16881-2|TRXR1_DROME	Thioredoxin reductase 1, cytoplasmic OS=Homo sapiens GN=TXNRD1 PE=1 SV=3; Isoform 6 of Thioredoxin reductase 1, cytoplasmic OS=Homo sapiens GN=TXNRD1; Isoform 5 of Thioredoxin reductase 1, cytoplasmic OS=Homo sapiens GN=TXNRD1; Isoform 4 of Thioredoxin reductase 1, cytoplasmic OS=Homo sapiens GN=TXNRD1; Isoform 3 of Thioredoxin reductase 1, cytoplasmic OS=Homo sapiens GN=TXNRD1; Isoform 2 of Thio…	0	99	VVYENAYGQFIGPHR				-0.000359313	1748.86	583.962	1748.86	583.962	3	23	1.1.1.2280.10	34.2739	345231	310184	34.2	0.2	85262.3
1	sp|Q16881|TRXR1_DROME; sp|Q16881-6|TRXR1_DROME; sp|Q16881-5|TRXR1_DROME; sp|Q16881-4|TRXR1_DROME; sp|Q16881-3|TRXR1_DROME; sp|Q16881-2|TRXR1_DROME	Thioredoxin reductase 1, cytoplasmic OS=Homo sapiens GN=TXNRD1 PE=1 SV=3; Isoform 6 of Thioredoxin reductase 1, cytoplasmic OS=Homo sapiens GN=TXNRD1; Isoform 5 of Thioredoxin reductase 1, cytoplasmic OS=Homo sapiens GN=TXNRD1; Isoform 4 of Thioredoxin reductase 1, cytoplasmic OS=Homo sapiens GN=TXNRD1; Isoform 3 of Thioredoxin reductase 1, cytoplasmic OS=Homo sapiens GN=TXNRD1; Isoform 2 of Thio…	0	99	VVYENAYGQFIGPHR				-0.000359313	1748.86	583.962	1748.86	583.962	3	22	1.1.1.2278.5	34.1737	345231	311376	34.2	0.2	51193.1
1	sp|Q16881|TRXR1_DROME; sp|Q16881-6|TRXR1_DROME; sp|Q16881-5|TRXR1_DROME; sp|Q16881-4|TRXR1_DROME; sp|Q16881-3|TRXR1_DROME; sp|Q16881-2|TRXR1_DROME	Thioredoxin reductase 1, cytoplasmic OS=Homo sapiens GN=TXNRD1 PE=1 SV=3; Isoform 6 of Thioredoxin reductase 1, cytoplasmic OS=Homo sapiens GN=TXNRD1; Isoform 5 of Thioredoxin reductase 1, cytoplasmic OS=Homo sapiens GN=TXNRD1; Isoform 4 of Thioredoxin reductase 1, cytoplasmic OS=Homo sapiens GN=TXNRD1; Isoform 3 of Thioredoxin reductase 1, cytoplasmic OS=Homo sapiens GN=TXNRD1; Isoform 2 of Thio…	0	99	WGLGGTCVNVGCIPK	Carbamidomethyl(C)@7; Carbamidomethyl(C)@12			-0.00299661	1616.78	809.396	1616.78	809.397	2	25	1.1.1.2434.20	41.8217	1898011	393622	41.64	0.15	37912.5
1	sp|Q16881|TRXR1_DROME; sp|Q16881-6|TRXR1_DROME; sp|Q16881-5|TRXR1_DROME; sp|Q16881-4|TRXR1_DROME; sp|Q16881-3|TRXR1_DROME; sp|Q16881-2|TRXR1_DROME	Thioredoxin reductase 1, cytoplasmic OS=Homo sapiens GN=TXNRD1 PE=1 SV=3; Isoform 6 of Thioredoxin reductase 1, cytoplasmic OS=Homo sapiens GN=TXNRD1; Isoform 5 of Thioredoxin reductase 1, cytoplasmic OS=Homo sapiens GN=TXNRD1; Isoform 4 of Thioredoxin reductase 1, cytoplasmic OS=Homo sapiens GN=TXNRD1; Isoform 3 of Thioredoxin reductase 1, cytoplasmic OS=Homo sapiens GN=TXNRD1; Isoform 2 of Thio…	0	99	WGLGGTCVNVGCIPK	Lys-add@N-term; Carbamidomethyl(C)@7; Carbamidomethyl(C)@12			0.00160667	1744.88	582.633	1744.88	582.632	3	14	1.1.1.2337.9	37.0281	33495.5	23717.2	36.97	0.1	2494.24
1	sp|Q16881|TRXR1_DROME; sp|Q16881-6|TRXR1_DROME; sp|Q16881-5|TRXR1_DROME; sp|Q16881-4|TRXR1_DROME; sp|Q16881-3|TRXR1_DROME; sp|Q16881-2|TRXR1_DROME	Thioredoxin reductase 1, cytoplasmic OS=Homo sapiens GN=TXNRD1 PE=1 SV=3; Isoform 6 of Thioredoxin reductase 1, cytoplasmic OS=Homo sapiens GN=TXNRD1; Isoform 5 of Thioredoxin reductase 1, cytoplasmic OS=Homo sapiens GN=TXNRD1; Isoform 4 of Thioredoxin reductase 1, cytoplasmic OS=Homo sapiens GN=TXNRD1; Isoform 3 of Thioredoxin reductase 1, cytoplasmic OS=Homo sapiens GN=TXNRD1; Isoform 2 of Thio…	0	99	WGLGGTCVNVGCIPK	Oxidation(W)@1; Carbamidomethyl(C)@7; Carbamidomethyl(C)@12			0.00269994	1632.78	817.396	1632.78	817.395	2	12	1.1.1.2411.11	40.6971	1400.07	435.26	40.61	0.2	464.984
1	sp|Q16881|TRXR1_DROME; sp|Q16881-6|TRXR1_DROME; sp|Q16881-5|TRXR1_DROME; sp|Q16881-4|TRXR1_DROME; sp|Q16881-3|TRXR1_DROME; sp|Q16881-2|TRXR1_DROME	Thioredoxin reductase 1, cytoplasmic OS=Homo sapiens GN=TXNRD1 PE=1 SV=3; Isoform 6 of Thioredoxin reductase 1, cytoplasmic OS=Homo sapiens GN=TXNRD1; Isoform 5 of Thioredoxin reductase 1, cytoplasmic OS=Homo sapiens GN=TXNRD1; Isoform 4 of Thioredoxin reductase 1, cytoplasmic OS=Homo sapiens GN=TXNRD1; Isoform 3 of Thioredoxin reductase 1, cytoplasmic OS=Homo sapiens GN=TXNRD1; Isoform 2 of Thio…	0	99	WGLGGTCVNVGCIPK	Carbamidomethyl(C)@7; Carbamidomethyl(C)@12			-0.00299661	1616.78	809.396	1616.78	809.397	2	24	1.1.1.2432.15	41.727	1898011	1185798	41.64	0.15	134797
1	sp|Q16881|TRXR1_DROME; sp|Q16881-6|TRXR1_DROME; sp|Q16881-5|TRXR1_DROME; sp|Q16881-4|TRXR1_DROME; sp|Q16881-3|TRXR1_DROME; sp|Q16881-2|TRXR1_DROME	Thioredoxin reductase 1, cytoplasmic OS=Homo sapiens GN=TXNRD1 PE=1 SV=3; Isoform 6 of Thioredoxin reductase 1, cytoplasmic OS=Homo sapiens GN=TXNRD1; Isoform 5 of Thioredoxin reductase 1, cytoplasmic OS=Homo sapiens GN=TXNRD1; Isoform 4 of Thioredoxin reductase 1, cytoplasmic OS=Homo sapiens GN=TXNRD1; Isoform 3 of Thioredoxin reductase 1, cytoplasmic OS=Homo sapiens GN=TXNRD1; Isoform 2 of Thio…	0	99	WGLGGTCVNVGCIPK	Carbamidomethyl(C)@7; Carbamidomethyl(C)@12			-0.00299661	1616.78	809.396	1616.78	809.397	2	24	1.1.1.2433.8	41.7729	1898011	761721	41.64	0.15	87258.2
1	sp|Q16881|TRXR1_DROME; sp|Q16881-6|TRXR1_DROME; sp|Q16881-5|TRXR1_DROME; sp|Q16881-4|TRXR1_DROME; sp|Q16881-3|TRXR1_DROME; sp|Q16881-2|TRXR1_DROME	Thioredoxin reductase 1, cytoplasmic OS=Homo sapiens GN=TXNRD1 PE=1 SV=3; Isoform 6 of Thioredoxin reductase 1, cytoplasmic OS=Homo sapiens GN=TXNRD1; Isoform 5 of Thioredoxin reductase 1, cytoplasmic OS=Homo sapiens GN=TXNRD1; Isoform 4 of Thioredoxin reductase 1, cytoplasmic OS=Homo sapiens GN=TXNRD1; Isoform 3 of Thioredoxin reductase 1, cytoplasmic OS=Homo sapiens GN=TXNRD1; Isoform 2 of Thio…	0	99	WGLGGTCVNVGCIPK	Carbamidomethyl(C)@7; Carbamidomethyl(C)@12; Didehydro@C-term			0.00154495	1614.77	808.39	1614.76	808.39	2	14	1.1.1.2428.22	41.5307	25913.9	22080.4	41.49	0.29	3595.51
1	sp|Q16881|TRXR1_DROME; sp|Q16881-6|TRXR1_DROME; sp|Q16881-5|TRXR1_DROME; sp|Q16881-4|TRXR1_DROME; sp|Q16881-3|TRXR1_DROME; sp|Q16881-2|TRXR1_DROME	Thioredoxin reductase 1, cytoplasmic OS=Homo sapiens GN=TXNRD1 PE=1 SV=3; Isoform 6 of Thioredoxin reductase 1, cytoplasmic OS=Homo sapiens GN=TXNRD1; Isoform 5 of Thioredoxin reductase 1, cytoplasmic OS=Homo sapiens GN=TXNRD1; Isoform 4 of Thioredoxin reductase 1, cytoplasmic OS=Homo sapiens GN=TXNRD1; Isoform 3 of Thioredoxin reductase 1, cytoplasmic OS=Homo sapiens GN=TXNRD1; Isoform 2 of Thio…	0	99	WGLGGTCVNVGCIPK	Carbamidomethyl(C)@7; Carbamidomethyl(C)@12			-0.00299661	1616.78	809.396	1616.78	809.397	2	24	1.1.1.2431.19	41.6727	1898011	1708363	41.64	0.15	172478
1	sp|Q16881|TRXR1_DROME; sp|Q16881-6|TRXR1_DROME; sp|Q16881-5|TRXR1_DROME; sp|Q16881-4|TRXR1_DROME; sp|Q16881-3|TRXR1_DROME; sp|Q16881-2|TRXR1_DROME	Thioredoxin reductase 1, cytoplasmic OS=Homo sapiens GN=TXNRD1 PE=1 SV=3; Isoform 6 of Thioredoxin reductase 1, cytoplasmic OS=Homo sapiens GN=TXNRD1; Isoform 5 of Thioredoxin reductase 1, cytoplasmic OS=Homo sapiens GN=TXNRD1; Isoform 4 of Thioredoxin reductase 1, cytoplasmic OS=Homo sapiens GN=TXNRD1; Isoform 3 of Thioredoxin reductase 1, cytoplasmic OS=Homo sapiens GN=TXNRD1; Isoform 2 of Thio…	0	99	WGLGGTCVNVGCIPK	Oxidation(W)@1; Carbamidomethyl(C)@7; Carbamidomethyl(C)@12			-0.00145045	1632.77	817.394	1632.78	817.395	2	12	1.1.1.2361.21	38.24	5768.27	5276.24	38.2	0.15	1587.35
1	sp|Q16881|TRXR1_DROME; sp|Q16881-6|TRXR1_DROME; sp|Q16881-5|TRXR1_DROME; sp|Q16881-4|TRXR1_DROME; sp|Q16881-3|TRXR1_DROME; sp|Q16881-2|TRXR1_DROME	Thioredoxin reductase 1, cytoplasmic OS=Homo sapiens GN=TXNRD1 PE=1 SV=3; Isoform 6 of Thioredoxin reductase 1, cytoplasmic OS=Homo sapiens GN=TXNRD1; Isoform 5 of Thioredoxin reductase 1, cytoplasmic OS=Homo sapiens GN=TXNRD1; Isoform 4 of Thioredoxin reductase 1, cytoplasmic OS=Homo sapiens GN=TXNRD1; Isoform 3 of Thioredoxin reductase 1, cytoplasmic OS=Homo sapiens GN=TXNRD1; Isoform 2 of Thio…	0	99	WGLGGTCVNVGCIPKK	Carbamidomethyl(C)@7; Carbamidomethyl(C)@12; Dioxidation(K)@15; Delta:H(2)C(2)(K)@16	Dioxidation(K)@217	missed K-K@15	-0.000624797	1802.88	601.967	1802.88	601.968	3	16	1.1.1.2383.9	39.2972	4471.57	4176.15	39.28	0.2	1220.32
1	sp|Q16881|TRXR1_DROME; sp|Q16881-6|TRXR1_DROME; sp|Q16881-5|TRXR1_DROME; sp|Q16881-4|TRXR1_DROME; sp|Q16881-3|TRXR1_DROME; sp|Q16881-2|TRXR1_DROME	Thioredoxin reductase 1, cytoplasmic OS=Homo sapiens GN=TXNRD1 PE=1 SV=3; Isoform 6 of Thioredoxin reductase 1, cytoplasmic OS=Homo sapiens GN=TXNRD1; Isoform 5 of Thioredoxin reductase 1, cytoplasmic OS=Homo sapiens GN=TXNRD1; Isoform 4 of Thioredoxin reductase 1, cytoplasmic OS=Homo sapiens GN=TXNRD1; Isoform 3 of Thioredoxin reductase 1, cytoplasmic OS=Homo sapiens GN=TXNRD1; Isoform 2 of Thio…	0	99	WGLGGTCVNVGCIPKK	Carbamidomethyl(C)@7; Carbamidomethyl(C)@12; Delta:H(2)C(2)(K)@15; Dioxidation(K)@16	Dioxidation(K)@218	missed K-K@15	-0.000624797	1802.88	601.967	1802.88	601.968	3	16	1.1.1.2383.9	39.2972	4471.57	4176.15	39.28	0.2	1220.32
1	sp|Q16881|TRXR1_DROME; sp|Q16881-6|TRXR1_DROME; sp|Q16881-5|TRXR1_DROME; sp|Q16881-4|TRXR1_DROME; sp|Q16881-3|TRXR1_DROME; sp|Q16881-2|TRXR1_DROME	Thioredoxin reductase 1, cytoplasmic OS=Homo sapiens GN=TXNRD1 PE=1 SV=3; Isoform 6 of Thioredoxin reductase 1, cytoplasmic OS=Homo sapiens GN=TXNRD1; Isoform 5 of Thioredoxin reductase 1, cytoplasmic OS=Homo sapiens GN=TXNRD1; Isoform 4 of Thioredoxin reductase 1, cytoplasmic OS=Homo sapiens GN=TXNRD1; Isoform 3 of Thioredoxin reductase 1, cytoplasmic OS=Homo sapiens GN=TXNRD1; Isoform 2 of Thio…	0	99	YLGIPGDK				0.000451426	861.46	431.737	861.46	431.737	2	10	1.1.1.2120.3	26.3731	27396.8	23135.1	26.47	0.64	6378.28
1	sp|Q16881|TRXR1_DROME; sp|Q16881-6|TRXR1_DROME; sp|Q16881-5|TRXR1_DROME; sp|Q16881-4|TRXR1_DROME; sp|Q16881-3|TRXR1_DROME; sp|Q16881-2|TRXR1_DROME	Thioredoxin reductase 1, cytoplasmic OS=Homo sapiens GN=TXNRD1 PE=1 SV=3; Isoform 6 of Thioredoxin reductase 1, cytoplasmic OS=Homo sapiens GN=TXNRD1; Isoform 5 of Thioredoxin reductase 1, cytoplasmic OS=Homo sapiens GN=TXNRD1; Isoform 4 of Thioredoxin reductase 1, cytoplasmic OS=Homo sapiens GN=TXNRD1; Isoform 3 of Thioredoxin reductase 1, cytoplasmic OS=Homo sapiens GN=TXNRD1; Isoform 2 of Thio…	0	99	YLGIPGDK				0.000451426	861.46	431.737	861.46	431.737	2	10	1.1.1.2122.5	26.4809	27396.8	26885.3	26.47	0.64	8098.42
1	sp|Q16881|TRXR1_DROME; sp|Q16881-6|TRXR1_DROME; sp|Q16881-5|TRXR1_DROME; sp|Q16881-4|TRXR1_DROME; sp|Q16881-3|TRXR1_DROME; sp|Q16881-2|TRXR1_DROME	Thioredoxin reductase 1, cytoplasmic OS=Homo sapiens GN=TXNRD1 PE=1 SV=3; Isoform 6 of Thioredoxin reductase 1, cytoplasmic OS=Homo sapiens GN=TXNRD1; Isoform 5 of Thioredoxin reductase 1, cytoplasmic OS=Homo sapiens GN=TXNRD1; Isoform 4 of Thioredoxin reductase 1, cytoplasmic OS=Homo sapiens GN=TXNRD1; Isoform 3 of Thioredoxin reductase 1, cytoplasmic OS=Homo sapiens GN=TXNRD1; Isoform 2 of Thio…	0	99	YLGIPGDKEYCIS	Carbamidomethyl(C)@11		cleaved S-S@C-term; missed K-E@8	0.00082394	1513.71	757.864	1513.71	757.863	2	15	1.1.1.2373.13	38.8242	68430.9	46563.7	38.98	0.39	6733.15
1	sp|Q16881|TRXR1_DROME; sp|Q16881-6|TRXR1_DROME; sp|Q16881-5|TRXR1_DROME; sp|Q16881-4|TRXR1_DROME; sp|Q16881-3|TRXR1_DROME; sp|Q16881-2|TRXR1_DROME	Thioredoxin reductase 1, cytoplasmic OS=Homo sapiens GN=TXNRD1 PE=1 SV=3; Isoform 6 of Thioredoxin reductase 1, cytoplasmic OS=Homo sapiens GN=TXNRD1; Isoform 5 of Thioredoxin reductase 1, cytoplasmic OS=Homo sapiens GN=TXNRD1; Isoform 4 of Thioredoxin reductase 1, cytoplasmic OS=Homo sapiens GN=TXNRD1; Isoform 3 of Thioredoxin reductase 1, cytoplasmic OS=Homo sapiens GN=TXNRD1; Isoform 2 of Thio…	0	99	YVALECAGF	Carbamidomethyl(C)@6		cleaved S-Y@N-term; cleaved F-L@C-term	0.0298609	1028.49	1029.5	1028.46	1029.47	1	11	1.1.1.2431.25	41.6827	201.58	201.58			2259.75
1	sp|Q16881|TRXR1_DROME; sp|Q16881-6|TRXR1_DROME; sp|Q16881-5|TRXR1_DROME; sp|Q16881-4|TRXR1_DROME; sp|Q16881-3|TRXR1_DROME; sp|Q16881-2|TRXR1_DROME	Thioredoxin reductase 1, cytoplasmic OS=Homo sapiens GN=TXNRD1 PE=1 SV=3; Isoform 6 of Thioredoxin reductase 1, cytoplasmic OS=Homo sapiens GN=TXNRD1; Isoform 5 of Thioredoxin reductase 1, cytoplasmic OS=Homo sapiens GN=TXNRD1; Isoform 4 of Thioredoxin reductase 1, cytoplasmic OS=Homo sapiens GN=TXNRD1; Isoform 3 of Thioredoxin reductase 1, cytoplasmic OS=Homo sapiens GN=TXNRD1; Isoform 2 of Thio…	0	98.68	WGLGGTCVNVGCIPK	Oxidation(W)@1; Carbamidomethyl(C)@7; Carbamidomethyl(C)@12			0.00269994	1632.78	817.396	1632.78	817.395	2	12	1.1.1.2408.7	40.5348	1400.07	1086.87	40.61	0.2	749.733
1	sp|Q16881|TRXR1_DROME; sp|Q16881-6|TRXR1_DROME; sp|Q16881-5|TRXR1_DROME; sp|Q16881-4|TRXR1_DROME; sp|Q16881-3|TRXR1_DROME; sp|Q16881-2|TRXR1_DROME	Thioredoxin reductase 1, cytoplasmic OS=Homo sapiens GN=TXNRD1 PE=1 SV=3; Isoform 6 of Thioredoxin reductase 1, cytoplasmic OS=Homo sapiens GN=TXNRD1; Isoform 5 of Thioredoxin reductase 1, cytoplasmic OS=Homo sapiens GN=TXNRD1; Isoform 4 of Thioredoxin reductase 1, cytoplasmic OS=Homo sapiens GN=TXNRD1; Isoform 3 of Thioredoxin reductase 1, cytoplasmic OS=Homo sapiens GN=TXNRD1; Isoform 2 of Thio…	0	98.68	YLGIPGDKEYCIS	Carbamidomethyl(C)@11		cleaved S-S@C-term; missed K-E@8	0.00082394	1513.71	757.864	1513.71	757.863	2	15	1.1.1.2375.12	38.9095	68430.9	60115.4	38.98	0.39	9947.21
1	sp|Q16881|TRXR1_DROME; sp|Q16881-6|TRXR1_DROME; sp|Q16881-5|TRXR1_DROME; sp|Q16881-4|TRXR1_DROME; sp|Q16881-3|TRXR1_DROME; sp|Q16881-2|TRXR1_DROME	Thioredoxin reductase 1, cytoplasmic OS=Homo sapiens GN=TXNRD1 PE=1 SV=3; Isoform 6 of Thioredoxin reductase 1, cytoplasmic OS=Homo sapiens GN=TXNRD1; Isoform 5 of Thioredoxin reductase 1, cytoplasmic OS=Homo sapiens GN=TXNRD1; Isoform 4 of Thioredoxin reductase 1, cytoplasmic OS=Homo sapiens GN=TXNRD1; Isoform 3 of Thioredoxin reductase 1, cytoplasmic OS=Homo sapiens GN=TXNRD1; Isoform 2 of Thio…	0.114074	98.44	TTLSVTKR			cleaved F-T@N-term; missed K-R@7	0.000472713	904.535	453.275	904.534	453.274	2	10	1.1.1.1834.7	12.5611	6103.13	6008.92	12.59	0.15	2060.49
1	sp|Q16881|TRXR1_DROME; sp|Q16881-6|TRXR1_DROME; sp|Q16881-5|TRXR1_DROME; sp|Q16881-4|TRXR1_DROME; sp|Q16881-3|TRXR1_DROME; sp|Q16881-2|TRXR1_DROME	Thioredoxin reductase 1, cytoplasmic OS=Homo sapiens GN=TXNRD1 PE=1 SV=3; Isoform 6 of Thioredoxin reductase 1, cytoplasmic OS=Homo sapiens GN=TXNRD1; Isoform 5 of Thioredoxin reductase 1, cytoplasmic OS=Homo sapiens GN=TXNRD1; Isoform 4 of Thioredoxin reductase 1, cytoplasmic OS=Homo sapiens GN=TXNRD1; Isoform 3 of Thioredoxin reductase 1, cytoplasmic OS=Homo sapiens GN=TXNRD1; Isoform 2 of Thio…	0	98.29	GFDQDMANK				0.000408887	1024.43	513.222	1024.43	513.221	2	15	1.1.1.1951.17	18.2022	192241	159768	18.12	0.25	31516
1	sp|Q16881|TRXR1_DROME; sp|Q16881-6|TRXR1_DROME; sp|Q16881-5|TRXR1_DROME; sp|Q16881-4|TRXR1_DROME; sp|Q16881-3|TRXR1_DROME; sp|Q16881-2|TRXR1_DROME	Thioredoxin reductase 1, cytoplasmic OS=Homo sapiens GN=TXNRD1 PE=1 SV=3; Isoform 6 of Thioredoxin reductase 1, cytoplasmic OS=Homo sapiens GN=TXNRD1; Isoform 5 of Thioredoxin reductase 1, cytoplasmic OS=Homo sapiens GN=TXNRD1; Isoform 4 of Thioredoxin reductase 1, cytoplasmic OS=Homo sapiens GN=TXNRD1; Isoform 3 of Thioredoxin reductase 1, cytoplasmic OS=Homo sapiens GN=TXNRD1; Isoform 2 of Thio…	0	98.08	IPVTDEEQTNVPY			cleaved Y-I@C-term	1.57712e-05	1503.71	752.862	1503.71	752.862	2	14	1.1.1.2290.21	34.7784	366472	270392	34.69	0.2	28365.2
1	sp|Q16881|TRXR1_DROME; sp|Q16881-6|TRXR1_DROME; sp|Q16881-5|TRXR1_DROME; sp|Q16881-4|TRXR1_DROME; sp|Q16881-3|TRXR1_DROME; sp|Q16881-2|TRXR1_DROME	Thioredoxin reductase 1, cytoplasmic OS=Homo sapiens GN=TXNRD1 PE=1 SV=3; Isoform 6 of Thioredoxin reductase 1, cytoplasmic OS=Homo sapiens GN=TXNRD1; Isoform 5 of Thioredoxin reductase 1, cytoplasmic OS=Homo sapiens GN=TXNRD1; Isoform 4 of Thioredoxin reductase 1, cytoplasmic OS=Homo sapiens GN=TXNRD1; Isoform 3 of Thioredoxin reductase 1, cytoplasmic OS=Homo sapiens GN=TXNRD1; Isoform 2 of Thio…	0	98.08	IPVTDEEQTNVPY			cleaved Y-I@C-term	1.57712e-05	1503.71	752.862	1503.71	752.862	2	13	1.1.1.2292.17	34.8754	366472	114748	34.69	0.2	9297.18
1	sp|Q16881|TRXR1_DROME; sp|Q16881-6|TRXR1_DROME; sp|Q16881-5|TRXR1_DROME; sp|Q16881-4|TRXR1_DROME; sp|Q16881-3|TRXR1_DROME; sp|Q16881-2|TRXR1_DROME	Thioredoxin reductase 1, cytoplasmic OS=Homo sapiens GN=TXNRD1 PE=1 SV=3; Isoform 6 of Thioredoxin reductase 1, cytoplasmic OS=Homo sapiens GN=TXNRD1; Isoform 5 of Thioredoxin reductase 1, cytoplasmic OS=Homo sapiens GN=TXNRD1; Isoform 4 of Thioredoxin reductase 1, cytoplasmic OS=Homo sapiens GN=TXNRD1; Isoform 3 of Thioredoxin reductase 1, cytoplasmic OS=Homo sapiens GN=TXNRD1; Isoform 2 of Thio…	0	98.08	LMHQAALLGQALQDSR	Oxidation(M)@2			-0.00252504	1766.91	589.976	1766.91	589.977	3	9	1.1.1.2332.12	36.8313	1703.64	457.07	36.92	0.1	1606.04
1	sp|Q16881|TRXR1_DROME; sp|Q16881-6|TRXR1_DROME; sp|Q16881-5|TRXR1_DROME; sp|Q16881-4|TRXR1_DROME; sp|Q16881-3|TRXR1_DROME; sp|Q16881-2|TRXR1_DROME	Thioredoxin reductase 1, cytoplasmic OS=Homo sapiens GN=TXNRD1 PE=1 SV=3; Isoform 6 of Thioredoxin reductase 1, cytoplasmic OS=Homo sapiens GN=TXNRD1; Isoform 5 of Thioredoxin reductase 1, cytoplasmic OS=Homo sapiens GN=TXNRD1; Isoform 4 of Thioredoxin reductase 1, cytoplasmic OS=Homo sapiens GN=TXNRD1; Isoform 3 of Thioredoxin reductase 1, cytoplasmic OS=Homo sapiens GN=TXNRD1; Isoform 2 of Thio…	0	98.08	WGLGGTCVNVGCIPK	Carbamidomethyl(C)@7; Carbamidomethyl(C)@12			-0.00299661	1616.78	809.396	1616.78	809.397	2	24	1.1.1.2429.19	41.5764	1898011	1391143	41.64	0.15	155320
1	sp|Q16881|TRXR1_DROME; sp|Q16881-6|TRXR1_DROME; sp|Q16881-5|TRXR1_DROME; sp|Q16881-4|TRXR1_DROME; sp|Q16881-3|TRXR1_DROME; sp|Q16881-2|TRXR1_DROME	Thioredoxin reductase 1, cytoplasmic OS=Homo sapiens GN=TXNRD1 PE=1 SV=3; Isoform 6 of Thioredoxin reductase 1, cytoplasmic OS=Homo sapiens GN=TXNRD1; Isoform 5 of Thioredoxin reductase 1, cytoplasmic OS=Homo sapiens GN=TXNRD1; Isoform 4 of Thioredoxin reductase 1, cytoplasmic OS=Homo sapiens GN=TXNRD1; Isoform 3 of Thioredoxin reductase 1, cytoplasmic OS=Homo sapiens GN=TXNRD1; Isoform 2 of Thio…	0	97.78	GFDQDMANK	Oxidation(M)@6			0.00160192	1040.42	521.22	1040.42	521.219	2	11	1.1.1.1832.6	12.4691	2198.47	2051.62	12.5	0.2	984.049
1	sp|Q16881|TRXR1_DROME; sp|Q16881-6|TRXR1_DROME; sp|Q16881-5|TRXR1_DROME; sp|Q16881-4|TRXR1_DROME; sp|Q16881-3|TRXR1_DROME; sp|Q16881-2|TRXR1_DROME	Thioredoxin reductase 1, cytoplasmic OS=Homo sapiens GN=TXNRD1 PE=1 SV=3; Isoform 6 of Thioredoxin reductase 1, cytoplasmic OS=Homo sapiens GN=TXNRD1; Isoform 5 of Thioredoxin reductase 1, cytoplasmic OS=Homo sapiens GN=TXNRD1; Isoform 4 of Thioredoxin reductase 1, cytoplasmic OS=Homo sapiens GN=TXNRD1; Isoform 3 of Thioredoxin reductase 1, cytoplasmic OS=Homo sapiens GN=TXNRD1; Isoform 2 of Thio…	0	97.78	GFDQDMANK				0.00101924	1024.43	513.222	1024.43	513.221	2	14	1.1.1.1945.12	17.8995	184373	173236	17.93	0.2	26103.7
1	sp|Q16881|TRXR1_DROME; sp|Q16881-6|TRXR1_DROME; sp|Q16881-5|TRXR1_DROME; sp|Q16881-4|TRXR1_DROME; sp|Q16881-3|TRXR1_DROME; sp|Q16881-2|TRXR1_DROME	Thioredoxin reductase 1, cytoplasmic OS=Homo sapiens GN=TXNRD1 PE=1 SV=3; Isoform 6 of Thioredoxin reductase 1, cytoplasmic OS=Homo sapiens GN=TXNRD1; Isoform 5 of Thioredoxin reductase 1, cytoplasmic OS=Homo sapiens GN=TXNRD1; Isoform 4 of Thioredoxin reductase 1, cytoplasmic OS=Homo sapiens GN=TXNRD1; Isoform 3 of Thioredoxin reductase 1, cytoplasmic OS=Homo sapiens GN=TXNRD1; Isoform 2 of Thio…	0	97.59	GFDQDMANK				0.00101924	1024.43	513.222	1024.43	513.221	2	15	1.1.1.1946.10	17.9454	184373	184124	17.93	0.2	29158.4
1	sp|Q16881|TRXR1_DROME; sp|Q16881-6|TRXR1_DROME; sp|Q16881-5|TRXR1_DROME; sp|Q16881-4|TRXR1_DROME; sp|Q16881-3|TRXR1_DROME; sp|Q16881-2|TRXR1_DROME	Thioredoxin reductase 1, cytoplasmic OS=Homo sapiens GN=TXNRD1 PE=1 SV=3; Isoform 6 of Thioredoxin reductase 1, cytoplasmic OS=Homo sapiens GN=TXNRD1; Isoform 5 of Thioredoxin reductase 1, cytoplasmic OS=Homo sapiens GN=TXNRD1; Isoform 4 of Thioredoxin reductase 1, cytoplasmic OS=Homo sapiens GN=TXNRD1; Isoform 3 of Thioredoxin reductase 1, cytoplasmic OS=Homo sapiens GN=TXNRD1; Isoform 2 of Thio…	0	97.42	KLMHQAALL			cleaved L-G@C-term; missed K-L@1	0.000882463	1023.59	512.803	1023.59	512.802	2	12	1.1.1.2094.10	25.1034	67465.7	13398.1	24.93	0.1	2568.43
1	sp|Q16881|TRXR1_DROME; sp|Q16881-6|TRXR1_DROME; sp|Q16881-5|TRXR1_DROME; sp|Q16881-4|TRXR1_DROME; sp|Q16881-3|TRXR1_DROME; sp|Q16881-2|TRXR1_DROME	Thioredoxin reductase 1, cytoplasmic OS=Homo sapiens GN=TXNRD1 PE=1 SV=3; Isoform 6 of Thioredoxin reductase 1, cytoplasmic OS=Homo sapiens GN=TXNRD1; Isoform 5 of Thioredoxin reductase 1, cytoplasmic OS=Homo sapiens GN=TXNRD1; Isoform 4 of Thioredoxin reductase 1, cytoplasmic OS=Homo sapiens GN=TXNRD1; Isoform 3 of Thioredoxin reductase 1, cytoplasmic OS=Homo sapiens GN=TXNRD1; Isoform 2 of Thio…	0.0366845	96.54	GQFIGPHR			cleaved Y-G@N-term	0.00129408	910.479	456.247	910.477	456.246	2	12	1.1.1.1885.2	14.984	12898.3	12320.3	14.97	0.15	4525
1	sp|Q16881|TRXR1_DROME; sp|Q16881-6|TRXR1_DROME; sp|Q16881-5|TRXR1_DROME; sp|Q16881-4|TRXR1_DROME; sp|Q16881-3|TRXR1_DROME; sp|Q16881-2|TRXR1_DROME	Thioredoxin reductase 1, cytoplasmic OS=Homo sapiens GN=TXNRD1 PE=1 SV=3; Isoform 6 of Thioredoxin reductase 1, cytoplasmic OS=Homo sapiens GN=TXNRD1; Isoform 5 of Thioredoxin reductase 1, cytoplasmic OS=Homo sapiens GN=TXNRD1; Isoform 4 of Thioredoxin reductase 1, cytoplasmic OS=Homo sapiens GN=TXNRD1; Isoform 3 of Thioredoxin reductase 1, cytoplasmic OS=Homo sapiens GN=TXNRD1; Isoform 2 of Thio…	0	96.54	RSGASILQAGC	Carbamidomethyl(C)@11		cleaved C-U@C-term; missed R-S@1	-0.00123995	1118.55	560.282	1118.55	560.282	2	11	1.1.1.2034.17	22.2473	71037.1	56282.3	22.31	0.15	6878.02
1	sp|Q16881|TRXR1_DROME; sp|Q16881-6|TRXR1_DROME; sp|Q16881-5|TRXR1_DROME; sp|Q16881-4|TRXR1_DROME; sp|Q16881-3|TRXR1_DROME; sp|Q16881-2|TRXR1_DROME	Thioredoxin reductase 1, cytoplasmic OS=Homo sapiens GN=TXNRD1 PE=1 SV=3; Isoform 6 of Thioredoxin reductase 1, cytoplasmic OS=Homo sapiens GN=TXNRD1; Isoform 5 of Thioredoxin reductase 1, cytoplasmic OS=Homo sapiens GN=TXNRD1; Isoform 4 of Thioredoxin reductase 1, cytoplasmic OS=Homo sapiens GN=TXNRD1; Isoform 3 of Thioredoxin reductase 1, cytoplasmic OS=Homo sapiens GN=TXNRD1; Isoform 2 of Thio…	1.25964	96.42	LYAGSTVK				0.000936026	837.46	419.738	837.46	419.737	2	10	1.1.1.1883.3	14.8812	347391	58463.8	14.63	0.2	8863.5
1	sp|Q16881|TRXR1_DROME; sp|Q16881-6|TRXR1_DROME; sp|Q16881-5|TRXR1_DROME; sp|Q16881-4|TRXR1_DROME; sp|Q16881-3|TRXR1_DROME; sp|Q16881-2|TRXR1_DROME	Thioredoxin reductase 1, cytoplasmic OS=Homo sapiens GN=TXNRD1 PE=1 SV=3; Isoform 6 of Thioredoxin reductase 1, cytoplasmic OS=Homo sapiens GN=TXNRD1; Isoform 5 of Thioredoxin reductase 1, cytoplasmic OS=Homo sapiens GN=TXNRD1; Isoform 4 of Thioredoxin reductase 1, cytoplasmic OS=Homo sapiens GN=TXNRD1; Isoform 3 of Thioredoxin reductase 1, cytoplasmic OS=Homo sapiens GN=TXNRD1; Isoform 2 of Thio…	0.00612308	95.97	KLMHQAALLGQAL			cleaved L-Q@C-term; missed K-L@1	-0.00511782	1392.79	465.269	1392.79	465.271	3	10	1.1.1.2302.5	35.3417	6753.07	6169.66	35.32	0.15	2022.99
1	sp|Q16881|TRXR1_DROME; sp|Q16881-6|TRXR1_DROME; sp|Q16881-5|TRXR1_DROME; sp|Q16881-4|TRXR1_DROME; sp|Q16881-3|TRXR1_DROME; sp|Q16881-2|TRXR1_DROME	Thioredoxin reductase 1, cytoplasmic OS=Homo sapiens GN=TXNRD1 PE=1 SV=3; Isoform 6 of Thioredoxin reductase 1, cytoplasmic OS=Homo sapiens GN=TXNRD1; Isoform 5 of Thioredoxin reductase 1, cytoplasmic OS=Homo sapiens GN=TXNRD1; Isoform 4 of Thioredoxin reductase 1, cytoplasmic OS=Homo sapiens GN=TXNRD1; Isoform 3 of Thioredoxin reductase 1, cytoplasmic OS=Homo sapiens GN=TXNRD1; Isoform 2 of Thio…	0	95.97	WGLGGTCVNVGCIPK	Carbamidomethyl(C)@7; Carbamidomethyl(C)@12			-0.00299661	1616.78	809.396	1616.78	809.397	2	24	1.1.1.2430.16	41.6319	1898011	1848599	41.64	0.15	183909
1	sp|Q16881|TRXR1_DROME; sp|Q16881-6|TRXR1_DROME; sp|Q16881-5|TRXR1_DROME; sp|Q16881-4|TRXR1_DROME; sp|Q16881-3|TRXR1_DROME; sp|Q16881-2|TRXR1_DROME	Thioredoxin reductase 1, cytoplasmic OS=Homo sapiens GN=TXNRD1 PE=1 SV=3; Isoform 6 of Thioredoxin reductase 1, cytoplasmic OS=Homo sapiens GN=TXNRD1; Isoform 5 of Thioredoxin reductase 1, cytoplasmic OS=Homo sapiens GN=TXNRD1; Isoform 4 of Thioredoxin reductase 1, cytoplasmic OS=Homo sapiens GN=TXNRD1; Isoform 3 of Thioredoxin reductase 1, cytoplasmic OS=Homo sapiens GN=TXNRD1; Isoform 2 of Thio…	0.00700489	95.81	GEHMEEHGIK			cleaved I-G@N-term	0.00150288	1165.52	583.767	1165.52	583.767	2	16	1.1.1.1899.23	15.658	2424.26	2414.39	15.66	0.2	4629.99
1	sp|Q16881|TRXR1_DROME; sp|Q16881-6|TRXR1_DROME; sp|Q16881-5|TRXR1_DROME; sp|Q16881-4|TRXR1_DROME; sp|Q16881-3|TRXR1_DROME; sp|Q16881-2|TRXR1_DROME	Thioredoxin reductase 1, cytoplasmic OS=Homo sapiens GN=TXNRD1 PE=1 SV=3; Isoform 6 of Thioredoxin reductase 1, cytoplasmic OS=Homo sapiens GN=TXNRD1; Isoform 5 of Thioredoxin reductase 1, cytoplasmic OS=Homo sapiens GN=TXNRD1; Isoform 4 of Thioredoxin reductase 1, cytoplasmic OS=Homo sapiens GN=TXNRD1; Isoform 3 of Thioredoxin reductase 1, cytoplasmic OS=Homo sapiens GN=TXNRD1; Isoform 2 of Thio…	0.0231917	95.54	KVVYENAY			cleaved Y-G@C-term; missed K-V@1	-0.000500497	984.491	493.253	984.492	493.253	2	12	1.1.1.2007.6	20.9511	12713.8	12575.8	20.98	0.15	2747.81
1	sp|Q16881|TRXR1_DROME; sp|Q16881-6|TRXR1_DROME; sp|Q16881-5|TRXR1_DROME; sp|Q16881-4|TRXR1_DROME; sp|Q16881-3|TRXR1_DROME; sp|Q16881-2|TRXR1_DROME	Thioredoxin reductase 1, cytoplasmic OS=Homo sapiens GN=TXNRD1 PE=1 SV=3; Isoform 6 of Thioredoxin reductase 1, cytoplasmic OS=Homo sapiens GN=TXNRD1; Isoform 5 of Thioredoxin reductase 1, cytoplasmic OS=Homo sapiens GN=TXNRD1; Isoform 4 of Thioredoxin reductase 1, cytoplasmic OS=Homo sapiens GN=TXNRD1; Isoform 3 of Thioredoxin reductase 1, cytoplasmic OS=Homo sapiens GN=TXNRD1; Isoform 2 of Thio…	1.13077	95.13	VEETVKHDWDR			missed K-H@6	-0.000383436	1412.67	471.897	1412.67	471.897	3	14	1.1.1.1911.8	16.2226	137540	112612	16.2	0.1	17204
2	sp|Q9NNW7|TRXR2_DROME; sp|Q9NNW7-2|TRXR2_DROME	Thioredoxin reductase 2, mitochondrial OS=Homo sapiens GN=TXNRD2 PE=1 SV=3; Isoform 2 of Thioredoxin reductase 2, mitochondrial OS=Homo sapiens GN=TXNRD2	2	99	AALLGGLIQDAPNYGWEVAQPVPHDWR			cleaved Q-A@N-term	-0.00390077	2972.49	595.505	2972.49	595.506	5	13	1.1.1.2508.4	45.4485	9596.6	9596.6	45.44	0.1	1708.47
2	sp|Q9NNW7|TRXR2_DROME; sp|Q9NNW7-2|TRXR2_DROME	Thioredoxin reductase 2, mitochondrial OS=Homo sapiens GN=TXNRD2 PE=1 SV=3; Isoform 2 of Thioredoxin reductase 2, mitochondrial OS=Homo sapiens GN=TXNRD2	2	99	AGVDTSPDTQK				0.00104139	1117.53	559.77	1117.53	559.77	2	17	1.1.1.1843.21	12.938	473822	11031.1	12.6	0.2	2198.17
2	sp|Q9NNW7|TRXR2_DROME; sp|Q9NNW7-2|TRXR2_DROME	Thioredoxin reductase 2, mitochondrial OS=Homo sapiens GN=TXNRD2 PE=1 SV=3; Isoform 2 of Thioredoxin reductase 2, mitochondrial OS=Homo sapiens GN=TXNRD2	2	99	AGVDTSPDTQKILVDSR			missed K-I@11	-8.40651e-05	1800.92	601.314	1800.92	601.315	3	14	1.1.1.2158.20	28.2712	5313.95	4659.03	28.24	0.15	1878.14
2	sp|Q9NNW7|TRXR2_DROME; sp|Q9NNW7-2|TRXR2_DROME	Thioredoxin reductase 2, mitochondrial OS=Homo sapiens GN=TXNRD2 PE=1 SV=3; Isoform 2 of Thioredoxin reductase 2, mitochondrial OS=Homo sapiens GN=TXNRD2	2	99	ALLGGLIQDAPNYGWEVAQPVPHDWR			cleaved A-A@N-term	-0.000995165	2901.46	968.159	2901.46	968.159	3	16	1.1.1.2506.8	45.3714	315785	74460.9	45.25	0.1	966.226
2	sp|Q9NNW7|TRXR2_DROME; sp|Q9NNW7-2|TRXR2_DROME	Thioredoxin reductase 2, mitochondrial OS=Homo sapiens GN=TXNRD2 PE=1 SV=3; Isoform 2 of Thioredoxin reductase 2, mitochondrial OS=Homo sapiens GN=TXNRD2	2	99	ASFVDEHTVCGVAK	Carbamidomethyl(C)@10			-0.00077966	1518.71	507.245	1518.71	507.245	3	12	1.1.1.2142.9	27.4692	5340.65	4229.19	27.6	0.34	1262.32
2	sp|Q9NNW7|TRXR2_DROME; sp|Q9NNW7-2|TRXR2_DROME	Thioredoxin reductase 2, mitochondrial OS=Homo sapiens GN=TXNRD2 PE=1 SV=3; Isoform 2 of Thioredoxin reductase 2, mitochondrial OS=Homo sapiens GN=TXNRD2	2	99	CGASYAQVMR	Carbamidomethyl(C)@1			-4.55495e-05	1141.5	571.758	1141.5	571.758	2	17	1.1.1.2036.19	22.3493	113865	54020.2	22.27	0.1	6225.5
2	sp|Q9NNW7|TRXR2_DROME; sp|Q9NNW7-2|TRXR2_DROME	Thioredoxin reductase 2, mitochondrial OS=Homo sapiens GN=TXNRD2 PE=1 SV=3; Isoform 2 of Thioredoxin reductase 2, mitochondrial OS=Homo sapiens GN=TXNRD2	2	99	DDIFWLK			cleaved S-D@N-term	0.000711686	935.476	468.745	935.475	468.745	2	10	1.1.1.2467.2	43.4198	3134.93	3053.6	43.41	0.1	696.345
2	sp|Q9NNW7|TRXR2_DROME; sp|Q9NNW7-2|TRXR2_DROME	Thioredoxin reductase 2, mitochondrial OS=Homo sapiens GN=TXNRD2 PE=1 SV=3; Isoform 2 of Thioredoxin reductase 2, mitochondrial OS=Homo sapiens GN=TXNRD2	2	99	DYDLLVVGGGSGGL			cleaved L-A@C-term	0.000423122	1320.66	661.336	1320.66	661.335	2	9	1.1.1.2511.10	45.6072	23633.3	4762.96	45.4	0.15	701.345
2	sp|Q9NNW7|TRXR2_DROME; sp|Q9NNW7-2|TRXR2_DROME	Thioredoxin reductase 2, mitochondrial OS=Homo sapiens GN=TXNRD2 PE=1 SV=3; Isoform 2 of Thioredoxin reductase 2, mitochondrial OS=Homo sapiens GN=TXNRD2	2	99	DYDLLVVGGGSGGLACAK	Carbamidomethyl(C)@16			0.00202908	1750.86	876.436	1750.86	876.435	2	19	1.1.1.2458.19	43.0035	322709	36966.8	42.67	0.1	1953.7
2	sp|Q9NNW7|TRXR2_DROME; sp|Q9NNW7-2|TRXR2_DROME	Thioredoxin reductase 2, mitochondrial OS=Homo sapiens GN=TXNRD2 PE=1 SV=3; Isoform 2 of Thioredoxin reductase 2, mitochondrial OS=Homo sapiens GN=TXNRD2	2	99	EATSVPHIY			cleaved Y-A@C-term	-0.000405981	1015.5	508.756	1015.5	508.756	2	14	1.1.1.2138.13	27.2742	636907	84930.7	27.59	0.39	12258.1
2	sp|Q9NNW7|TRXR2_DROME; sp|Q9NNW7-2|TRXR2_DROME	Thioredoxin reductase 2, mitochondrial OS=Homo sapiens GN=TXNRD2 PE=1 SV=3; Isoform 2 of Thioredoxin reductase 2, mitochondrial OS=Homo sapiens GN=TXNRD2	2	99	ECAGFLTGIGLDTTIM	Carbamidomethyl(C)@2		cleaved L-E@N-term; cleaved M-M@C-term	0.00131383	1697.8	849.908	1697.8	849.907	2	15	1.1.1.2543.19	47.2041	27039.8	25805.3	47.18	0.15	2955.82
2	sp|Q9NNW7|TRXR2_DROME; sp|Q9NNW7-2|TRXR2_DROME	Thioredoxin reductase 2, mitochondrial OS=Homo sapiens GN=TXNRD2 PE=1 SV=3; Isoform 2 of Thioredoxin reductase 2, mitochondrial OS=Homo sapiens GN=TXNRD2	2	99	ECAGFLTGIGLDTTIMMR	Carbamidomethyl(C)@2		cleaved L-E@N-term	-0.000832442	1984.94	662.654	1984.94	662.655	3	20	1.1.1.2518.4	45.9442	13991.8	10250.3	45.99	0.15	1911.1
2	sp|Q9NNW7|TRXR2_DROME; sp|Q9NNW7-2|TRXR2_DROME	Thioredoxin reductase 2, mitochondrial OS=Homo sapiens GN=TXNRD2 PE=1 SV=3; Isoform 2 of Thioredoxin reductase 2, mitochondrial OS=Homo sapiens GN=TXNRD2	2	99	EDTGTFDTVLW			cleaved W-A@C-term	-0.000442827	1282.57	642.293	1282.57	642.293	2	13	1.1.1.2509.6	45.5014	155252	112077	45.55	0.15	12648.8
2	sp|Q9NNW7|TRXR2_DROME; sp|Q9NNW7-2|TRXR2_DROME	Thioredoxin reductase 2, mitochondrial OS=Homo sapiens GN=TXNRD2 PE=1 SV=3; Isoform 2 of Thioredoxin reductase 2, mitochondrial OS=Homo sapiens GN=TXNRD2	2	99	EILLSADHIIIA			cleaved A-T@C-term	0.00117805	1306.75	654.383	1306.75	654.382	2	19	1.1.1.2475.5	43.8274	130549	123550	43.85	0.1	27869.4
2	sp|Q9NNW7|TRXR2_DROME; sp|Q9NNW7-2|TRXR2_DROME	Thioredoxin reductase 2, mitochondrial OS=Homo sapiens GN=TXNRD2 PE=1 SV=3; Isoform 2 of Thioredoxin reductase 2, mitochondrial OS=Homo sapiens GN=TXNRD2	2	99	EILLSADHIIIAT			cleaved T-G@C-term	0.000691079	1407.8	704.906	1407.8	704.906	2	20	1.1.1.2477.8	43.9251	120957	120792	43.92	0.1	22337.7
2	sp|Q9NNW7|TRXR2_DROME; sp|Q9NNW7-2|TRXR2_DROME	Thioredoxin reductase 2, mitochondrial OS=Homo sapiens GN=TXNRD2 PE=1 SV=3; Isoform 2 of Thioredoxin reductase 2, mitochondrial OS=Homo sapiens GN=TXNRD2	2	99	EILLSADHIIIATGGR			cleaved R-P@C-term	-0.00291418	1677.94	560.32	1677.94	560.321	3	20	1.1.1.2437.5	41.9444	148957	81638.6	41.84	0.15	13600.8
2	sp|Q9NNW7|TRXR2_DROME; sp|Q9NNW7-2|TRXR2_DROME	Thioredoxin reductase 2, mitochondrial OS=Homo sapiens GN=TXNRD2 PE=1 SV=3; Isoform 2 of Thioredoxin reductase 2, mitochondrial OS=Homo sapiens GN=TXNRD2	2	99	EILLSADHIIIATGGRPR				0.00159039	1931.1	644.706	1931.1	644.706	3	13	1.1.1.2415.8	40.8748	5897.52	1621.4	40.32	0.25	1080.24
2	sp|Q9NNW7|TRXR2_DROME; sp|Q9NNW7-2|TRXR2_DROME	Thioredoxin reductase 2, mitochondrial OS=Homo sapiens GN=TXNRD2 PE=1 SV=3; Isoform 2 of Thioredoxin reductase 2, mitochondrial OS=Homo sapiens GN=TXNRD2	2	99	EPPQLVLGL			cleaved L-H@C-term	0.000168751	964.559	483.287	964.559	483.287	2	13	1.1.1.2493.3	44.7069	327117	271807	44.65	0.15	36854.1
2	sp|Q9NNW7|TRXR2_DROME; sp|Q9NNW7-2|TRXR2_DROME	Thioredoxin reductase 2, mitochondrial OS=Homo sapiens GN=TXNRD2 PE=1 SV=3; Isoform 2 of Thioredoxin reductase 2, mitochondrial OS=Homo sapiens GN=TXNRD2	2	99	EPPQLVLGLHF			cleaved F-L@C-term	-0.000186366	1248.69	625.351	1248.69	625.351	2	9	1.1.1.2496.11	44.8682	24135.5	19567	44.84	0.15	1939.4
2	sp|Q9NNW7|TRXR2_DROME; sp|Q9NNW7-2|TRXR2_DROME	Thioredoxin reductase 2, mitochondrial OS=Homo sapiens GN=TXNRD2 PE=1 SV=3; Isoform 2 of Thioredoxin reductase 2, mitochondrial OS=Homo sapiens GN=TXNRD2	2	99	EPPQLVLGLHFLGPNAGEVTQGFALGIK				-0.00066314	2901.57	968.199	2901.58	968.199	3	19	1.1.1.2528.18	46.4613	24708.8	23680.7	46.48	0.1	5474.39
2	sp|Q9NNW7|TRXR2_DROME; sp|Q9NNW7-2|TRXR2_DROME	Thioredoxin reductase 2, mitochondrial OS=Homo sapiens GN=TXNRD2 PE=1 SV=3; Isoform 2 of Thioredoxin reductase 2, mitochondrial OS=Homo sapiens GN=TXNRD2	2	99	FLGPNAGEVTQGFALGIK			cleaved H-F@N-term	7.24956e-05	1817.97	909.991	1817.97	909.991	2	15	1.1.1.2474.19	43.7948	10933.7	7565.29	43.76	0.15	2251.66
2	sp|Q9NNW7|TRXR2_DROME; sp|Q9NNW7-2|TRXR2_DROME	Thioredoxin reductase 2, mitochondrial OS=Homo sapiens GN=TXNRD2 PE=1 SV=3; Isoform 2 of Thioredoxin reductase 2, mitochondrial OS=Homo sapiens GN=TXNRD2	2	99	GFDQQMSSMVIEH			cleaved H-M@C-term	-0.00100177	1507.64	754.829	1507.64	754.829	2	18	1.1.1.2358.7	38.0854	12117.1	8776.23	38.04	0.15	1963.51
2	sp|Q9NNW7|TRXR2_DROME; sp|Q9NNW7-2|TRXR2_DROME	Thioredoxin reductase 2, mitochondrial OS=Homo sapiens GN=TXNRD2 PE=1 SV=3; Isoform 2 of Thioredoxin reductase 2, mitochondrial OS=Homo sapiens GN=TXNRD2	2	99	GFDQQMSSMVIEHM			cleaved M-A@C-term	0.00101665	1638.69	820.35	1638.68	820.349	2	21	1.1.1.2471.17	43.6431	133343	119011	43.67	0.1	24003
2	sp|Q9NNW7|TRXR2_DROME; sp|Q9NNW7-2|TRXR2_DROME	Thioredoxin reductase 2, mitochondrial OS=Homo sapiens GN=TXNRD2 PE=1 SV=3; Isoform 2 of Thioredoxin reductase 2, mitochondrial OS=Homo sapiens GN=TXNRD2	2	99	GFDQQMSSMVIEHMASHGTR				0.00355444	2247.99	563.004	2247.98	563.003	4	22	1.1.1.2404.4	40.3213	351770	186587	40.17	0.25	33480.2
2	sp|Q9NNW7|TRXR2_DROME; sp|Q9NNW7-2|TRXR2_DROME	Thioredoxin reductase 2, mitochondrial OS=Homo sapiens GN=TXNRD2 PE=1 SV=3; Isoform 2 of Thioredoxin reductase 2, mitochondrial OS=Homo sapiens GN=TXNRD2	2	99	GFLTGIGLDTTIM			cleaved A-G@N-term; cleaved M-M@C-term	-0.000955318	1337.69	669.852	1337.69	669.852	2	15	1.1.1.2542.5	47.1311	25921.1	24682.6	47.17	0.15	3516.52
2	sp|Q9NNW7|TRXR2_DROME; sp|Q9NNW7-2|TRXR2_DROME	Thioredoxin reductase 2, mitochondrial OS=Homo sapiens GN=TXNRD2 PE=1 SV=3; Isoform 2 of Thioredoxin reductase 2, mitochondrial OS=Homo sapiens GN=TXNRD2	2	99	GFLTGIGLDTTIMMR			cleaved A-G@N-term	0.00231835	1624.83	813.424	1624.83	813.423	2	21	1.1.1.2516.12	45.8615	18481.1	13973.2	45.79	0.15	2266.8
2	sp|Q9NNW7|TRXR2_DROME; sp|Q9NNW7-2|TRXR2_DROME	Thioredoxin reductase 2, mitochondrial OS=Homo sapiens GN=TXNRD2 PE=1 SV=3; Isoform 2 of Thioredoxin reductase 2, mitochondrial OS=Homo sapiens GN=TXNRD2	2	99	GIGLDTTIMMR			cleaved T-G@N-term	-0.000520139	1206.61	604.312	1206.61	604.312	2	16	1.1.1.2418.6	41.0123	20540.9	19977.3	41	0.2	2954.78
2	sp|Q9NNW7|TRXR2_DROME; sp|Q9NNW7-2|TRXR2_DROME	Thioredoxin reductase 2, mitochondrial OS=Homo sapiens GN=TXNRD2 PE=1 SV=3; Isoform 2 of Thioredoxin reductase 2, mitochondrial OS=Homo sapiens GN=TXNRD2	2	99	GITSDDIFWLK			cleaved Y-G@N-term	-0.000715451	1293.66	647.837	1293.66	647.838	2	17	1.1.1.2482.9	44.1741	190520	169011	44.21	0.1	31980.3
2	sp|Q9NNW7|TRXR2_DROME; sp|Q9NNW7-2|TRXR2_DROME	Thioredoxin reductase 2, mitochondrial OS=Homo sapiens GN=TXNRD2 PE=1 SV=3; Isoform 2 of Thioredoxin reductase 2, mitochondrial OS=Homo sapiens GN=TXNRD2	2	99	GLHFLGPNAGEVTQGF			cleaved L-G@N-term; cleaved F-A@C-term	0.00078039	1642.81	822.413	1642.81	822.412	2	19	1.1.1.2462.20	43.2033	239971	91575.1	43.12	0.1	5051.34
2	sp|Q9NNW7|TRXR2_DROME; sp|Q9NNW7-2|TRXR2_DROME	Thioredoxin reductase 2, mitochondrial OS=Homo sapiens GN=TXNRD2 PE=1 SV=3; Isoform 2 of Thioredoxin reductase 2, mitochondrial OS=Homo sapiens GN=TXNRD2	2	99	GLHFLGPNAGEVTQGFALGIK			cleaved L-G@N-term	-0.0036787	2125.13	709.383	2125.13	709.385	3	19	1.1.1.2473.12	43.7338	17970.9	10195.7	43.81	0.1	2614.82
2	sp|Q9NNW7|TRXR2_DROME; sp|Q9NNW7-2|TRXR2_DROME	Thioredoxin reductase 2, mitochondrial OS=Homo sapiens GN=TXNRD2 PE=1 SV=3; Isoform 2 of Thioredoxin reductase 2, mitochondrial OS=Homo sapiens GN=TXNRD2	2	99	HFLGPNAGEVTQGF			cleaved L-H@N-term; cleaved F-A@C-term	-0.000882081	1472.7	737.359	1472.7	737.36	2	22	1.1.1.2365.20	38.4267	428894	201179	38.64	0.39	28894.5
2	sp|Q9NNW7|TRXR2_DROME; sp|Q9NNW7-2|TRXR2_DROME	Thioredoxin reductase 2, mitochondrial OS=Homo sapiens GN=TXNRD2 PE=1 SV=3; Isoform 2 of Thioredoxin reductase 2, mitochondrial OS=Homo sapiens GN=TXNRD2	2	99	HFLGPNAGEVTQGFAL			cleaved L-H@N-term; cleaved L-G@C-term	-0.000242565	1656.83	829.42	1656.83	829.42	2	12	1.1.1.2469.19	43.5473	39012.2	19150.6	43.47	0.1	3224.59
2	sp|Q9NNW7|TRXR2_DROME; sp|Q9NNW7-2|TRXR2_DROME	Thioredoxin reductase 2, mitochondrial OS=Homo sapiens GN=TXNRD2 PE=1 SV=3; Isoform 2 of Thioredoxin reductase 2, mitochondrial OS=Homo sapiens GN=TXNRD2	2	99	HFLGPNAGEVTQGFALGIK			cleaved L-H@N-term	0.00204443	1955.03	652.683	1955.03	652.683	3	23	1.1.1.2450.8	42.5902	44840.1	32785.7	42.53	0.1	4062.15
2	sp|Q9NNW7|TRXR2_DROME; sp|Q9NNW7-2|TRXR2_DROME	Thioredoxin reductase 2, mitochondrial OS=Homo sapiens GN=TXNRD2 PE=1 SV=3; Isoform 2 of Thioredoxin reductase 2, mitochondrial OS=Homo sapiens GN=TXNRD2	2	99	KLMHQAALLGGLIQDAPNYGWEVAQPVPH			cleaved H-D@C-term; missed K-L@1	0.00323713	3152.63	789.164	3152.62	789.163	4	20	1.1.1.2488.11	44.4738	39159.1	33327.8	44.45	0.15	5852.44
2	sp|Q9NNW7|TRXR2_DROME; sp|Q9NNW7-2|TRXR2_DROME	Thioredoxin reductase 2, mitochondrial OS=Homo sapiens GN=TXNRD2 PE=1 SV=3; Isoform 2 of Thioredoxin reductase 2, mitochondrial OS=Homo sapiens GN=TXNRD2	2	99	KLMHQAALLGGLIQDAPNYGWEVAQPVPHDWR			missed K-L@1	-0.00248308	3609.83	722.973	3609.83	722.973	5	19	1.1.1.2490.7	44.5658	40943.7	38329.5	44.55	0.15	8021.16
2	sp|Q9NNW7|TRXR2_DROME; sp|Q9NNW7-2|TRXR2_DROME	Thioredoxin reductase 2, mitochondrial OS=Homo sapiens GN=TXNRD2 PE=1 SV=3; Isoform 2 of Thioredoxin reductase 2, mitochondrial OS=Homo sapiens GN=TXNRD2	2	99	KMAEAVQNHVK			missed K-M@1	0.0021032	1253.66	627.836	1253.66	627.835	2	13	1.1.1.1834.17	12.5828	47289.8	4376.4	12.3	0.2	566.797
2	sp|Q9NNW7|TRXR2_DROME; sp|Q9NNW7-2|TRXR2_DROME	Thioredoxin reductase 2, mitochondrial OS=Homo sapiens GN=TXNRD2 PE=1 SV=3; Isoform 2 of Thioredoxin reductase 2, mitochondrial OS=Homo sapiens GN=TXNRD2	2	99	KVAVVDYVEPSPQGTR	Formyl@N-term		missed K-V@1	0.001506	1771.91	886.963	1771.91	886.963	2	17	1.1.1.2291.26	34.8361	2784.14	2734.19	34.84	0.2	863.668
2	sp|Q9NNW7|TRXR2_DROME; sp|Q9NNW7-2|TRXR2_DROME	Thioredoxin reductase 2, mitochondrial OS=Homo sapiens GN=TXNRD2 PE=1 SV=3; Isoform 2 of Thioredoxin reductase 2, mitochondrial OS=Homo sapiens GN=TXNRD2	2	99	LFGGSSDLMDYDNVPTTVF			cleaved F-T@C-term	-0.00062198	2076.93	1039.47	2076.94	1039.47	2	15	1.1.1.2533.14	46.7107	353087	323156	46.68	0.1	3773.12
2	sp|Q9NNW7|TRXR2_DROME; sp|Q9NNW7-2|TRXR2_DROME	Thioredoxin reductase 2, mitochondrial OS=Homo sapiens GN=TXNRD2 PE=1 SV=3; Isoform 2 of Thioredoxin reductase 2, mitochondrial OS=Homo sapiens GN=TXNRD2	2	99	LFGGSSDLMDYDNVPTTVFTPLEY			cleaved Y-G@C-term	0.00109151	2680.23	894.416	2680.23	894.416	3	14	1.1.1.2563.9	48.1754	105493	90960.1	48.12	0.15	5613.16
2	sp|Q9NNW7|TRXR2_DROME; sp|Q9NNW7-2|TRXR2_DROME	Thioredoxin reductase 2, mitochondrial OS=Homo sapiens GN=TXNRD2 PE=1 SV=3; Isoform 2 of Thioredoxin reductase 2, mitochondrial OS=Homo sapiens GN=TXNRD2	2	99	LFGGSSDLMDYDNVPTTVFTPLEYGCVGLSEEEAVAR	Dioxidation(P)@15; No Carbamidomethyl(C)@26	Dioxidation(P)@396		0.0063664	4012.83	1004.22	4012.82	1004.21	4	17	1.1.1.2556.20	47.8492	5313.48	5216.1	47.86	0.15	1812.32
2	sp|Q9NNW7|TRXR2_DROME; sp|Q9NNW7-2|TRXR2_DROME	Thioredoxin reductase 2, mitochondrial OS=Homo sapiens GN=TXNRD2 PE=1 SV=3; Isoform 2 of Thioredoxin reductase 2, mitochondrial OS=Homo sapiens GN=TXNRD2	2	99	LGGLIQDAPNYGWEVAQPVPHDWR			cleaved L-L@N-term	0.00215193	2717.34	906.786	2717.33	906.786	3	18	1.1.1.2471.23	43.6531	58229.9	52321.4	43.62	0.1	5632.27
2	sp|Q9NNW7|TRXR2_DROME; sp|Q9NNW7-2|TRXR2_DROME	Thioredoxin reductase 2, mitochondrial OS=Homo sapiens GN=TXNRD2 PE=1 SV=3; Isoform 2 of Thioredoxin reductase 2, mitochondrial OS=Homo sapiens GN=TXNRD2	2	99	LLGGLIQDAPNYGWEVAQPVPHDWR			cleaved A-L@N-term	0.000895179	2830.42	708.612	2830.42	708.612	4	23	1.1.1.2495.7	44.8124	37529.5	35633.6	44.8	0.1	9526.85
2	sp|Q9NNW7|TRXR2_DROME; sp|Q9NNW7-2|TRXR2_DROME	Thioredoxin reductase 2, mitochondrial OS=Homo sapiens GN=TXNRD2 PE=1 SV=3; Isoform 2 of Thioredoxin reductase 2, mitochondrial OS=Homo sapiens GN=TXNRD2	2	99	LMHQAALLGGLIQ			cleaved Q-D@C-term	0.00237898	1363.77	682.891	1363.76	682.89	2	12	1.1.1.2465.13	43.3396	13660.9	10100.7	43.27	0.1	1281.57
2	sp|Q9NNW7|TRXR2_DROME; sp|Q9NNW7-2|TRXR2_DROME	Thioredoxin reductase 2, mitochondrial OS=Homo sapiens GN=TXNRD2 PE=1 SV=3; Isoform 2 of Thioredoxin reductase 2, mitochondrial OS=Homo sapiens GN=TXNRD2	2	99	LMHQAALLGGLIQDAPNYGWEVAQPVPH			cleaved H-D@C-term	0.0033162	3024.53	1009.18	3024.53	1009.18	3	25	1.1.1.2505.20	45.3336	69619.7	66295.6	45.3	0.1	7499.99
2	sp|Q9NNW7|TRXR2_DROME; sp|Q9NNW7-2|TRXR2_DROME	Thioredoxin reductase 2, mitochondrial OS=Homo sapiens GN=TXNRD2 PE=1 SV=3; Isoform 2 of Thioredoxin reductase 2, mitochondrial OS=Homo sapiens GN=TXNRD2	2	99	LMHQAALLGGLIQDAPNYGWEVAQPVPHDWR				0.00293058	3481.74	581.297	3481.74	581.297	6	20	1.1.1.2502.2	45.1491	40049.8	38586.9	45.14	0.15	4535.89
2	sp|Q9NNW7|TRXR2_DROME; sp|Q9NNW7-2|TRXR2_DROME	Thioredoxin reductase 2, mitochondrial OS=Homo sapiens GN=TXNRD2 PE=1 SV=3; Isoform 2 of Thioredoxin reductase 2, mitochondrial OS=Homo sapiens GN=TXNRD2	2	99	LPDGQLQVTWEDSTTGK				0.00204662	1873.91	937.961	1873.91	937.96	2	18	1.1.1.2373.15	38.8309	24432.1	4115.71	39.13	0.25	1308.81
2	sp|Q9NNW7|TRXR2_DROME; sp|Q9NNW7-2|TRXR2_DROME	Thioredoxin reductase 2, mitochondrial OS=Homo sapiens GN=TXNRD2 PE=1 SV=3; Isoform 2 of Thioredoxin reductase 2, mitochondrial OS=Homo sapiens GN=TXNRD2	2	99	LPDGQLQVTWEDSTTGKEDTGTFDTVLW	HNE(L)@27	HNE(L)@313	cleaved W-A@C-term; missed K-E@17	-0.0131708	3294.57	1099.2	3294.58	1099.2	3	18	1.1.1.2491.18	44.6434	42120.6	40082.1	44.61	0.2	5439.63
2	sp|Q9NNW7|TRXR2_DROME; sp|Q9NNW7-2|TRXR2_DROME	Thioredoxin reductase 2, mitochondrial OS=Homo sapiens GN=TXNRD2 PE=1 SV=3; Isoform 2 of Thioredoxin reductase 2, mitochondrial OS=Homo sapiens GN=TXNRD2	2	99	LTGIGLDTTIM			cleaved F-L@N-term; cleaved M-M@C-term	-0.000719992	1133.6	567.807	1133.6	567.807	2	12	1.1.1.2484.4	44.2644	18398	16165.6	44.3	0.1	2516.93
2	sp|Q9NNW7|TRXR2_DROME; sp|Q9NNW7-2|TRXR2_DROME	Thioredoxin reductase 2, mitochondrial OS=Homo sapiens GN=TXNRD2 PE=1 SV=3; Isoform 2 of Thioredoxin reductase 2, mitochondrial OS=Homo sapiens GN=TXNRD2	2	99	LTGIGLDTTIMMR			cleaved F-L@N-term	9.6859e-05	1420.74	711.378	1420.74	711.378	2	18	1.1.1.2461.16	43.1473	41858.9	35846	43.12	0.15	4533.4
2	sp|Q9NNW7|TRXR2_DROME; sp|Q9NNW7-2|TRXR2_DROME	Thioredoxin reductase 2, mitochondrial OS=Homo sapiens GN=TXNRD2 PE=1 SV=3; Isoform 2 of Thioredoxin reductase 2, mitochondrial OS=Homo sapiens GN=TXNRD2	2	99	MAEAVQNHVK				-0.00228143	1125.56	563.786	1125.56	563.787	2	14	1.1.1.1861.14	13.8261	161004	6199.3	13.54	0.2	786.372
2	sp|Q9NNW7|TRXR2_DROME; sp|Q9NNW7-2|TRXR2_DROME	Thioredoxin reductase 2, mitochondrial OS=Homo sapiens GN=TXNRD2 PE=1 SV=3; Isoform 2 of Thioredoxin reductase 2, mitochondrial OS=Homo sapiens GN=TXNRD2	2	99	RLPDGQLQVTWEDSTTGK			missed R-L@1	-0.0041484	2030	677.675	2030.01	677.676	3	21	1.1.1.2313.14	35.8987	58048.9	17034.2	35.43	0.54	6993.13
2	sp|Q9NNW7|TRXR2_DROME; sp|Q9NNW7-2|TRXR2_DROME	Thioredoxin reductase 2, mitochondrial OS=Homo sapiens GN=TXNRD2 PE=1 SV=3; Isoform 2 of Thioredoxin reductase 2, mitochondrial OS=Homo sapiens GN=TXNRD2	2	99	RLPDGQLQVTWEDSTTGKEDTGTF			cleaved F-D@C-term; missed R-L@1; missed K-E@18	-0.00209791	2680.26	894.427	2680.26	894.428	3	17	1.1.1.2434.23	41.8284	7502.3	7272.32	41.84	0.25	1354.51
2	sp|Q9NNW7|TRXR2_DROME; sp|Q9NNW7-2|TRXR2_DROME	Thioredoxin reductase 2, mitochondrial OS=Homo sapiens GN=TXNRD2 PE=1 SV=3; Isoform 2 of Thioredoxin reductase 2, mitochondrial OS=Homo sapiens GN=TXNRD2	2	99	SDDIFWLK	Formyl@N-term		cleaved T-S@N-term	-0.000746238	1050.5	526.258	1050.5	526.258	2	12	1.1.1.2510.3	45.546	5396.49	5147.87	45.53	0.1	1153.99
2	sp|Q9NNW7|TRXR2_DROME; sp|Q9NNW7-2|TRXR2_DROME	Thioredoxin reductase 2, mitochondrial OS=Homo sapiens GN=TXNRD2 PE=1 SV=3; Isoform 2 of Thioredoxin reductase 2, mitochondrial OS=Homo sapiens GN=TXNRD2	2	99	SYVALECAGFLTGIGLDTTIMMR	Carbamidomethyl(C)@7		cleaved A-S@N-term	0.00353576	2518.23	840.418	2518.23	840.416	3	17	1.1.1.2555.15	47.7916	4762.55	4459.42	47.77	0.34	829.03
2	sp|Q9NNW7|TRXR2_DROME; sp|Q9NNW7-2|TRXR2_DROME	Thioredoxin reductase 2, mitochondrial OS=Homo sapiens GN=TXNRD2 PE=1 SV=3; Isoform 2 of Thioredoxin reductase 2, mitochondrial OS=Homo sapiens GN=TXNRD2	2	99	TLVVGASYVALECAGFLTGIGLDTTIMMR	Carbamidomethyl(C)@13			-0.00318153	3058.55	1020.52	3058.55	1020.53	3	15	1.1.1.2608.10	50.3036	739.01	407.13	50.41	0.15	490.081
2	sp|Q9NNW7|TRXR2_DROME; sp|Q9NNW7-2|TRXR2_DROME	Thioredoxin reductase 2, mitochondrial OS=Homo sapiens GN=TXNRD2 PE=1 SV=3; Isoform 2 of Thioredoxin reductase 2, mitochondrial OS=Homo sapiens GN=TXNRD2	2	99	TPLEYGCVGLSEEEAVAR	Carbamidomethyl(C)@7		cleaved F-T@N-term	-0.00118465	1978.93	990.472	1978.93	990.473	2	23	1.1.1.2395.12	39.908	98596.6	52523.1	39.82	0.1	4618.69
2	sp|Q9NNW7|TRXR2_DROME; sp|Q9NNW7-2|TRXR2_DROME	Thioredoxin reductase 2, mitochondrial OS=Homo sapiens GN=TXNRD2 PE=1 SV=3; Isoform 2 of Thioredoxin reductase 2, mitochondrial OS=Homo sapiens GN=TXNRD2	2	99	TVGIHPTCSEEVVK	Carbamidomethyl(C)@8			0.000559391	1554.77	778.393	1554.77	778.393	2	23	1.1.1.2038.26	22.4595	228909	228046	22.46	0.25	32591.2
2	sp|Q9NNW7|TRXR2_DROME; sp|Q9NNW7-2|TRXR2_DROME	Thioredoxin reductase 2, mitochondrial OS=Homo sapiens GN=TXNRD2 PE=1 SV=3; Isoform 2 of Thioredoxin reductase 2, mitochondrial OS=Homo sapiens GN=TXNRD2	2	99	VALECAGFLTGIGLDTTIMMR	Carbamidomethyl(C)@5		cleaved Y-V@N-term	-0.00164964	2268.13	757.051	2268.13	757.051	3	17	1.1.1.2541.7	47.0848	11195.4	10898.2	47.07	0.25	1585.68
2	sp|Q9NNW7|TRXR2_DROME; sp|Q9NNW7-2|TRXR2_DROME	Thioredoxin reductase 2, mitochondrial OS=Homo sapiens GN=TXNRD2 PE=1 SV=3; Isoform 2 of Thioredoxin reductase 2, mitochondrial OS=Homo sapiens GN=TXNRD2	2	99	VAVVDYVEPSPQ			cleaved Q-G@C-term	-0.00317254	1301.65	651.831	1301.65	651.832	2	15	1.1.1.2311.11	35.807	3698.47	1627.56	35.92	0.2	788.242
2	sp|Q9NNW7|TRXR2_DROME; sp|Q9NNW7-2|TRXR2_DROME	Thioredoxin reductase 2, mitochondrial OS=Homo sapiens GN=TXNRD2 PE=1 SV=3; Isoform 2 of Thioredoxin reductase 2, mitochondrial OS=Homo sapiens GN=TXNRD2	2	99	VAVVDYVEPSPQGTR				0.000544438	1615.82	539.614	1615.82	539.614	3	15	1.1.1.2239.7	32.2392	207324	16393.2	31.88	0.2	7850.51
2	sp|Q9NNW7|TRXR2_DROME; sp|Q9NNW7-2|TRXR2_DROME	Thioredoxin reductase 2, mitochondrial OS=Homo sapiens GN=TXNRD2 PE=1 SV=3; Isoform 2 of Thioredoxin reductase 2, mitochondrial OS=Homo sapiens GN=TXNRD2	2	99	VFTPLEYGCVGLSEEEAVAR	Carbamidomethyl(C)@9		cleaved T-V@N-term	0.00372648	2225.07	742.698	2225.07	742.696	3	19	1.1.1.2477.11	43.9301	33420.7	25011.8	43.9	0.1	5947.6
2	sp|Q9NNW7|TRXR2_DROME; sp|Q9NNW7-2|TRXR2_DROME	Thioredoxin reductase 2, mitochondrial OS=Homo sapiens GN=TXNRD2 PE=1 SV=3; Isoform 2 of Thioredoxin reductase 2, mitochondrial OS=Homo sapiens GN=TXNRD2	2	99	YPTHIEGALEYGIT			cleaved T-S@C-term	0.00123949	1562.76	782.389	1562.76	782.388	2	23	1.1.1.2394.16	39.8555	500355	149411	40.02	0.3	11879.6
2	sp|Q9NNW7|TRXR2_DROME; sp|Q9NNW7-2|TRXR2_DROME	Thioredoxin reductase 2, mitochondrial OS=Homo sapiens GN=TXNRD2 PE=1 SV=3; Isoform 2 of Thioredoxin reductase 2, mitochondrial OS=Homo sapiens GN=TXNRD2	2	99	YPTHIEGALEYGITSDDIFWLK				-0.00495988	2567.25	642.821	2567.26	642.822	4	13	1.1.1.2515.5	45.797	9500.44	6002.47	45.74	0.1	1438.36
2	sp|Q9NNW7|TRXR2_DROME; sp|Q9NNW7-2|TRXR2_DROME	Thioredoxin reductase 2, mitochondrial OS=Homo sapiens GN=TXNRD2 PE=1 SV=3; Isoform 2 of Thioredoxin reductase 2, mitochondrial OS=Homo sapiens GN=TXNRD2	2	99	YVALECAGFLTGIGLDTTIMMR	Carbamidomethyl(C)@6		cleaved S-Y@N-term	-0.0018054	2431.19	811.405	2431.2	811.406	3	19	1.1.1.2553.17	47.6959	15912	13244.4	47.62	0.2	1205.19
2	sp|Q9NNW7|TRXR2_DROME; sp|Q9NNW7-2|TRXR2_DROME	Thioredoxin reductase 2, mitochondrial OS=Homo sapiens GN=TXNRD2 PE=1 SV=3; Isoform 2 of Thioredoxin reductase 2, mitochondrial OS=Homo sapiens GN=TXNRD2	1.82391	99	YKPLEFTVAGR			cleaved H-Y@N-term	0.000500435	1279.69	427.572	1279.69	427.571	3	14	1.1.1.2214.2	31.0017	9177.66	9081.84	30.99	0.54	2826.91
2	sp|Q9NNW7|TRXR2_DROME; sp|Q9NNW7-2|TRXR2_DROME	Thioredoxin reductase 2, mitochondrial OS=Homo sapiens GN=TXNRD2 PE=1 SV=3; Isoform 2 of Thioredoxin reductase 2, mitochondrial OS=Homo sapiens GN=TXNRD2	1.48149	99	GFDQQMSSM			cleaved M-V@C-term	0.000430882	1029.39	515.702	1029.39	515.702	2	14	1.1.1.2229.12	31.755	182588	38461.7	31.49	0.25	6269.2
2	sp|Q9NNW7|TRXR2_DROME; sp|Q9NNW7-2|TRXR2_DROME	Thioredoxin reductase 2, mitochondrial OS=Homo sapiens GN=TXNRD2 PE=1 SV=3; Isoform 2 of Thioredoxin reductase 2, mitochondrial OS=Homo sapiens GN=TXNRD2	1.34679	99	GCVGLSEEEAVAR	Carbamidomethyl(C)@2		cleaved Y-G@N-term	-0.00138012	1375.64	688.827	1375.64	688.827	2	22	1.1.1.2126.8	26.706	69379.4	55049.3	26.66	0.15	16081
2	sp|Q9NNW7|TRXR2_DROME; sp|Q9NNW7-2|TRXR2_DROME	Thioredoxin reductase 2, mitochondrial OS=Homo sapiens GN=TXNRD2 PE=1 SV=3; Isoform 2 of Thioredoxin reductase 2, mitochondrial OS=Homo sapiens GN=TXNRD2	1.1549	99	GGLIQDAPNYGWEVAQPVPHDWR			cleaved L-G@N-term	0.00608256	2604.26	869.093	2604.25	869.091	3	13	1.1.1.2463.13	43.241	219314	78240.8	43.16	0.15	2950.88
2	sp|Q9NNW7|TRXR2_DROME; sp|Q9NNW7-2|TRXR2_DROME	Thioredoxin reductase 2, mitochondrial OS=Homo sapiens GN=TXNRD2 PE=1 SV=3; Isoform 2 of Thioredoxin reductase 2, mitochondrial OS=Homo sapiens GN=TXNRD2	1.11351	99	YPTHIEGALEY			cleaved Y-G@C-term	0.00145912	1291.61	646.812	1291.61	646.812	2	12	1.1.1.2292.14	34.8654	106581	91358.8	34.79	0.15	2584.06
2	sp|Q9NNW7|TRXR2_DROME; sp|Q9NNW7-2|TRXR2_DROME	Thioredoxin reductase 2, mitochondrial OS=Homo sapiens GN=TXNRD2 PE=1 SV=3; Isoform 2 of Thioredoxin reductase 2, mitochondrial OS=Homo sapiens GN=TXNRD2	1.05061	99	LMHQAALLGGL			cleaved L-I@C-term	-9.59051e-05	1122.62	562.318	1122.62	562.318	2	12	1.1.1.2412.3	40.7128	3606.45	3546.97	40.71	0.15	1258.66
2	sp|Q9NNW7|TRXR2_DROME; sp|Q9NNW7-2|TRXR2_DROME	Thioredoxin reductase 2, mitochondrial OS=Homo sapiens GN=TXNRD2 PE=1 SV=3; Isoform 2 of Thioredoxin reductase 2, mitochondrial OS=Homo sapiens GN=TXNRD2	1.00436	99	SGLDPTVTGC	Carbamidomethyl(C)@10		cleaved C-U@C-term	0.000366684	1005.44	503.729	1005.44	503.729	2	12	1.1.1.2106.14	25.7025	196501	3374.7	25.98	0.29	1559.85
2	sp|Q9NNW7|TRXR2_DROME; sp|Q9NNW7-2|TRXR2_DROME	Thioredoxin reductase 2, mitochondrial OS=Homo sapiens GN=TXNRD2 PE=1 SV=3; Isoform 2 of Thioredoxin reductase 2, mitochondrial OS=Homo sapiens GN=TXNRD2	0.853872	99	DAPNYGWEVAQPVPHDWR			cleaved Q-D@N-term	0.00139223	2135.98	713.001	2135.98	713.001	3	19	1.1.1.2423.13	41.2746	25979.1	22461.2	41.25	0.1	4667.02
2	sp|Q9NNW7|TRXR2_DROME; sp|Q9NNW7-2|TRXR2_DROME	Thioredoxin reductase 2, mitochondrial OS=Homo sapiens GN=TXNRD2 PE=1 SV=3; Isoform 2 of Thioredoxin reductase 2, mitochondrial OS=Homo sapiens GN=TXNRD2	0.853872	99	GFDQQMSSMVIEHMASH			cleaved H-G@C-term	0.00130002	1933.81	645.612	1933.81	645.611	3	17	1.1.1.2444.7	42.2927	43447.5	37094.7	42.27	0.1	5248.39
2	sp|Q9NNW7|TRXR2_DROME; sp|Q9NNW7-2|TRXR2_DROME	Thioredoxin reductase 2, mitochondrial OS=Homo sapiens GN=TXNRD2 PE=1 SV=3; Isoform 2 of Thioredoxin reductase 2, mitochondrial OS=Homo sapiens GN=TXNRD2	0.835647	99	KVAVVDYVEPSPQ			cleaved Q-G@C-term; missed K-V@1	0.00248733	1429.75	715.881	1429.75	715.88	2	14	1.1.1.2205.9	30.5886	4325.7	3042.46	30.51	0.2	863.937
2	sp|Q9NNW7|TRXR2_DROME; sp|Q9NNW7-2|TRXR2_DROME	Thioredoxin reductase 2, mitochondrial OS=Homo sapiens GN=TXNRD2 PE=1 SV=3; Isoform 2 of Thioredoxin reductase 2, mitochondrial OS=Homo sapiens GN=TXNRD2	0.790485	99	HGQEHVEVYHAH			cleaved H-Y@C-term	0.00259041	1441.65	481.558	1441.65	481.557	3	17	1.1.1.1819.2	11.8355	25822.6	12140.6	11.71	0.15	3399.92
2	sp|Q9NNW7|TRXR2_DROME; sp|Q9NNW7-2|TRXR2_DROME	Thioredoxin reductase 2, mitochondrial OS=Homo sapiens GN=TXNRD2 PE=1 SV=3; Isoform 2 of Thioredoxin reductase 2, mitochondrial OS=Homo sapiens GN=TXNRD2	0.747147	99	HAHYKPLEF			cleaved Y-H@N-term; cleaved F-T@C-term	-0.000743566	1140.57	571.293	1140.57	571.293	2	12	1.1.1.2062.19	23.5406	17315	16560.4	23.51	0.3	3035.72
2	sp|Q9NNW7|TRXR2_DROME; sp|Q9NNW7-2|TRXR2_DROME	Thioredoxin reductase 2, mitochondrial OS=Homo sapiens GN=TXNRD2 PE=1 SV=3; Isoform 2 of Thioredoxin reductase 2, mitochondrial OS=Homo sapiens GN=TXNRD2	0.58838	99	AIGDVVEGR			cleaved Y-A@N-term; cleaved R-P@C-term	0.000698594	914.483	458.249	914.482	458.248	2	15	1.1.1.2033.11	22.188	12859.6	11580.1	22.16	0.15	3819.48
2	sp|Q9NNW7|TRXR2_DROME; sp|Q9NNW7-2|TRXR2_DROME	Thioredoxin reductase 2, mitochondrial OS=Homo sapiens GN=TXNRD2 PE=1 SV=3; Isoform 2 of Thioredoxin reductase 2, mitochondrial OS=Homo sapiens GN=TXNRD2	0.534617	99	RLPDGQLQVTW			cleaved W-E@C-term; missed R-L@1	0.000746035	1311.69	656.854	1311.69	656.854	2	11	1.1.1.2409.9	40.5759	3939.23	3563.05	40.51	0.34	842.428
2	sp|Q9NNW7|TRXR2_DROME; sp|Q9NNW7-2|TRXR2_DROME	Thioredoxin reductase 2, mitochondrial OS=Homo sapiens GN=TXNRD2 PE=1 SV=3; Isoform 2 of Thioredoxin reductase 2, mitochondrial OS=Homo sapiens GN=TXNRD2	0.455932	99	KPLEFTVAGR			cleaved Y-K@N-term	0.000340761	1116.63	559.322	1116.63	559.322	2	11	1.1.1.2095.19	25.1675	4650.19	4175	25.38	0.39	1103.1
2	sp|Q9NNW7|TRXR2_DROME; sp|Q9NNW7-2|TRXR2_DROME	Thioredoxin reductase 2, mitochondrial OS=Homo sapiens GN=TXNRD2 PE=1 SV=3; Isoform 2 of Thioredoxin reductase 2, mitochondrial OS=Homo sapiens GN=TXNRD2	0.396856	99	FVDEHTVCGVAK	Carbamidomethyl(C)@8		cleaved S-F@N-term	0.000250616	1360.64	681.33	1360.64	681.33	2	21	1.1.1.2115.12	26.1521	3553.97	3511.46	26.17	0.34	1877.24
2	sp|Q9NNW7|TRXR2_DROME; sp|Q9NNW7-2|TRXR2_DROME	Thioredoxin reductase 2, mitochondrial OS=Homo sapiens GN=TXNRD2 PE=1 SV=3; Isoform 2 of Thioredoxin reductase 2, mitochondrial OS=Homo sapiens GN=TXNRD2	0.344862	99	EYGCVGLSEEEAVAR	Carbamidomethyl(C)@4		cleaved L-E@N-term	0.00354775	1667.75	556.924	1667.75	556.923	3	15	1.1.1.2245.9	32.5382	12663.8	7421.25	32.42	0.25	2638.32
2	sp|Q9NNW7|TRXR2_DROME; sp|Q9NNW7-2|TRXR2_DROME	Thioredoxin reductase 2, mitochondrial OS=Homo sapiens GN=TXNRD2 PE=1 SV=3; Isoform 2 of Thioredoxin reductase 2, mitochondrial OS=Homo sapiens GN=TXNRD2	0.270835	99	EPPQLVLGLH			cleaved H-F@C-term	0.000674128	1101.62	551.817	1101.62	551.816	2	17	1.1.1.2358.3	38.0604	119766	119175	38.05	0.35	17512.7
2	sp|Q9NNW7|TRXR2_DROME; sp|Q9NNW7-2|TRXR2_DROME	Thioredoxin reductase 2, mitochondrial OS=Homo sapiens GN=TXNRD2 PE=1 SV=3; Isoform 2 of Thioredoxin reductase 2, mitochondrial OS=Homo sapiens GN=TXNRD2	0.242604	99	HAHYKPLEFTVA			cleaved Y-H@N-term; cleaved A-G@C-term	0.000129171	1411.73	706.87	1411.72	706.87	2	16	1.1.1.2172.7	28.9678	10711	5557.65	29.18	0.39	1409.97
2	sp|Q9NNW7|TRXR2_DROME; sp|Q9NNW7-2|TRXR2_DROME	Thioredoxin reductase 2, mitochondrial OS=Homo sapiens GN=TXNRD2 PE=1 SV=3; Isoform 2 of Thioredoxin reductase 2, mitochondrial OS=Homo sapiens GN=TXNRD2	0.19382	99	VVGGGSGGLACAK	Carbamidomethyl(C)@11		cleaved L-V@N-term	-0.00100027	1131.57	566.792	1131.57	566.793	2	22	1.1.1.1912.9	16.2733	78948.8	76206.3	16.26	0.1	22330.4
2	sp|Q9NNW7|TRXR2_DROME; sp|Q9NNW7-2|TRXR2_DROME	Thioredoxin reductase 2, mitochondrial OS=Homo sapiens GN=TXNRD2 PE=1 SV=3; Isoform 2 of Thioredoxin reductase 2, mitochondrial OS=Homo sapiens GN=TXNRD2	0.169411	99	RSGLDPTVTGC	Carbamidomethyl(C)@11		cleaved C-U@C-term; missed R-S@1	0.0001872	1161.55	581.78	1161.54	581.78	2	15	1.1.1.2019.20	21.5569	61924.5	31224.2	21.67	0.2	9884.58
2	sp|Q9NNW7|TRXR2_DROME; sp|Q9NNW7-2|TRXR2_DROME	Thioredoxin reductase 2, mitochondrial OS=Homo sapiens GN=TXNRD2 PE=1 SV=3; Isoform 2 of Thioredoxin reductase 2, mitochondrial OS=Homo sapiens GN=TXNRD2	0.136083	99	FLGPNAGEVTQGF			cleaved H-F@N-term; cleaved F-A@C-term	0.00405724	1335.65	668.832	1335.65	668.83	2	16	1.1.1.2454.10	42.7913	121219	55105.4	42.72	0.1	4416.15
2	sp|Q9NNW7|TRXR2_DROME; sp|Q9NNW7-2|TRXR2_DROME	Thioredoxin reductase 2, mitochondrial OS=Homo sapiens GN=TXNRD2 PE=1 SV=3; Isoform 2 of Thioredoxin reductase 2, mitochondrial OS=Homo sapiens GN=TXNRD2	0.104025	99	DHIIIATGGR			cleaved A-D@N-term; cleaved R-P@C-term	-0.00249692	1051.57	526.795	1051.58	526.796	2	11	1.1.1.1965.14	18.897	2725.14	2383.92	18.86	0.1	752.576
2	sp|Q9NNW7|TRXR2_DROME; sp|Q9NNW7-2|TRXR2_DROME	Thioredoxin reductase 2, mitochondrial OS=Homo sapiens GN=TXNRD2 PE=1 SV=3; Isoform 2 of Thioredoxin reductase 2, mitochondrial OS=Homo sapiens GN=TXNRD2	0.076756	99	MAEAVQNH			cleaved H-V@C-term	0.00214357	898.399	450.207	898.397	450.206	2	11	1.1.1.1815.8	11.6307	2491.22	2327.25	11.61	0.15	872.925
2	sp|Q9NNW7|TRXR2_DROME; sp|Q9NNW7-2|TRXR2_DROME	Thioredoxin reductase 2, mitochondrial OS=Homo sapiens GN=TXNRD2 PE=1 SV=3; Isoform 2 of Thioredoxin reductase 2, mitochondrial OS=Homo sapiens GN=TXNRD2	0.0721166	99	GIHPTCSEEVVK	Carbamidomethyl(C)@6		cleaved V-G@N-term	0.00248889	1354.66	678.336	1354.66	678.335	2	18	1.1.1.2038.24	22.4562	18040.9	17858.2	22.46	0.25	3334.44
2	sp|Q9NNW7|TRXR2_DROME; sp|Q9NNW7-2|TRXR2_DROME	Thioredoxin reductase 2, mitochondrial OS=Homo sapiens GN=TXNRD2 PE=1 SV=3; Isoform 2 of Thioredoxin reductase 2, mitochondrial OS=Homo sapiens GN=TXNRD2	0.0624821	99	GLSEEEAVAR			cleaved V-G@N-term	0.00158865	1059.52	530.768	1059.52	530.767	2	14	1.1.1.1991.13	20.1654	6748.94	5768.94	20.19	0.15	1747.42
2	sp|Q9NNW7|TRXR2_DROME; sp|Q9NNW7-2|TRXR2_DROME	Thioredoxin reductase 2, mitochondrial OS=Homo sapiens GN=TXNRD2 PE=1 SV=3; Isoform 2 of Thioredoxin reductase 2, mitochondrial OS=Homo sapiens GN=TXNRD2	0.0604807	99	PTTVFTPLEYGCVGLSEEEAVAR	Oxidation(P)@7; Carbamidomethyl(C)@12	Oxidation(P)@402	cleaved V-P@N-term	-0.00258673	2540.21	636.059	2540.21	636.06	4	18	1.1.1.2391.7	39.696	22851.2	21866.8	39.68	0.15	5894.34
2	sp|Q9NNW7|TRXR2_DROME; sp|Q9NNW7-2|TRXR2_DROME	Thioredoxin reductase 2, mitochondrial OS=Homo sapiens GN=TXNRD2 PE=1 SV=3; Isoform 2 of Thioredoxin reductase 2, mitochondrial OS=Homo sapiens GN=TXNRD2	0.0362122	99	SMVIEHM			cleaved S-S@N-term; cleaved M-A@C-term	0.00171268	845.379	423.697	845.378	423.696	2	9	1.1.1.2110.4	25.8828	12975.6	8473.84	25.82	0.1	2058.29
2	sp|Q9NNW7|TRXR2_DROME; sp|Q9NNW7-2|TRXR2_DROME	Thioredoxin reductase 2, mitochondrial OS=Homo sapiens GN=TXNRD2 PE=1 SV=3; Isoform 2 of Thioredoxin reductase 2, mitochondrial OS=Homo sapiens GN=TXNRD2	0.0241089	99	KLMHQAALLGGLIQ			cleaved Q-D@C-term; missed K-L@1	0.000294593	1491.86	498.294	1491.86	498.294	3	9	1.1.1.2409.2	40.5643	2504.81	2374.05	40.59	0.1	1046.45
2	sp|Q9NNW7|TRXR2_DROME; sp|Q9NNW7-2|TRXR2_DROME	Thioredoxin reductase 2, mitochondrial OS=Homo sapiens GN=TXNRD2 PE=1 SV=3; Isoform 2 of Thioredoxin reductase 2, mitochondrial OS=Homo sapiens GN=TXNRD2	0.0204516	99	ASFVDEHTVC	Carbamidomethyl(C)@10		cleaved C-G@C-term	0.000298592	1163.49	582.753	1163.49	582.753	2	16	1.1.1.2097.18	25.2642	194703	86529.7	25.14	0.2	13614.7
2	sp|Q9NNW7|TRXR2_DROME; sp|Q9NNW7-2|TRXR2_DROME	Thioredoxin reductase 2, mitochondrial OS=Homo sapiens GN=TXNRD2 PE=1 SV=3; Isoform 2 of Thioredoxin reductase 2, mitochondrial OS=Homo sapiens GN=TXNRD2	0.00966115	99	SMVIEHMASHGTR			cleaved S-S@N-term	0.000300641	1454.68	485.899	1454.68	485.899	3	14	1.1.1.1953.3	18.2807	5664.65	5217.09	18.32	0.39	1620.58
2	sp|Q9NNW7|TRXR2_DROME; sp|Q9NNW7-2|TRXR2_DROME	Thioredoxin reductase 2, mitochondrial OS=Homo sapiens GN=TXNRD2 PE=1 SV=3; Isoform 2 of Thioredoxin reductase 2, mitochondrial OS=Homo sapiens GN=TXNRD2	0.00744649	99	LPDGQLQVT			cleaved T-W@C-term	0.00115975	969.514	485.764	969.513	485.764	2	12	1.1.1.2198.4	30.2284	6728.99	5507.81	30.31	0.29	1470.47
2	sp|Q9NNW7|TRXR2_DROME; sp|Q9NNW7-2|TRXR2_DROME	Thioredoxin reductase 2, mitochondrial OS=Homo sapiens GN=TXNRD2 PE=1 SV=3; Isoform 2 of Thioredoxin reductase 2, mitochondrial OS=Homo sapiens GN=TXNRD2	0.00744649	99	RLPDGQLQVT			cleaved T-W@C-term; missed R-L@1	0.00122247	1125.62	563.815	1125.61	563.814	2	13	1.1.1.2124.6	26.5808	27927.1	27677.8	26.56	0.49	5246.25
2	sp|Q9NNW7|TRXR2_DROME; sp|Q9NNW7-2|TRXR2_DROME	Thioredoxin reductase 2, mitochondrial OS=Homo sapiens GN=TXNRD2 PE=1 SV=3; Isoform 2 of Thioredoxin reductase 2, mitochondrial OS=Homo sapiens GN=TXNRD2	0.0043648	99	MSSMVIEHM			cleaved Q-M@N-term; cleaved M-A@C-term	-0.00135	1063.45	532.732	1063.45	532.732	2	10	1.1.1.2233.5	31.9399	3568.41	2376.74	32.03	0.35	661.645
2	sp|Q9NNW7|TRXR2_DROME; sp|Q9NNW7-2|TRXR2_DROME	Thioredoxin reductase 2, mitochondrial OS=Homo sapiens GN=TXNRD2 PE=1 SV=3; Isoform 2 of Thioredoxin reductase 2, mitochondrial OS=Homo sapiens GN=TXNRD2	0	99	AALLGGLIQDAPNYGWEVAQPVPHDWR			cleaved Q-A@N-term	-0.00156343	2972.49	744.13	2972.49	744.131	4	23	1.1.1.2507.7	45.404	70243.1	60361.1	45.44	0.1	12429.4
2	sp|Q9NNW7|TRXR2_DROME; sp|Q9NNW7-2|TRXR2_DROME	Thioredoxin reductase 2, mitochondrial OS=Homo sapiens GN=TXNRD2 PE=1 SV=3; Isoform 2 of Thioredoxin reductase 2, mitochondrial OS=Homo sapiens GN=TXNRD2	0	99	AALLGGLIQDAPNYGWEVAQPVPHDWR			cleaved Q-A@N-term	0.00373442	2972.5	991.84	2972.49	991.838	3	23	1.1.1.2507.18	45.4324	125355	121707	45.44	0.1	18367.3
2	sp|Q9NNW7|TRXR2_DROME; sp|Q9NNW7-2|TRXR2_DROME	Thioredoxin reductase 2, mitochondrial OS=Homo sapiens GN=TXNRD2 PE=1 SV=3; Isoform 2 of Thioredoxin reductase 2, mitochondrial OS=Homo sapiens GN=TXNRD2	0	99	AALLGGLIQDAPNYGWEVAQPVPHDWR			cleaved Q-A@N-term	-0.00156343	2972.49	744.13	2972.49	744.131	4	29	1.1.1.2508.14	45.4652	70243.1	62034.2	45.44	0.1	28680.7
2	sp|Q9NNW7|TRXR2_DROME; sp|Q9NNW7-2|TRXR2_DROME	Thioredoxin reductase 2, mitochondrial OS=Homo sapiens GN=TXNRD2 PE=1 SV=3; Isoform 2 of Thioredoxin reductase 2, mitochondrial OS=Homo sapiens GN=TXNRD2	0	99	AALLGGLIQDAPNYGWEVAQPVPHDWR			cleaved Q-A@N-term	0.00373442	2972.5	991.84	2972.49	991.838	3	23	1.1.1.2508.22	45.4819	125355	107686	45.44	0.1	7862.55
2	sp|Q9NNW7|TRXR2_DROME; sp|Q9NNW7-2|TRXR2_DROME	Thioredoxin reductase 2, mitochondrial OS=Homo sapiens GN=TXNRD2 PE=1 SV=3; Isoform 2 of Thioredoxin reductase 2, mitochondrial OS=Homo sapiens GN=TXNRD2	0	99	AALLGGLIQDAPNYGWEVAQPVPHDWR			cleaved Q-A@N-term	-0.00156343	2972.49	744.13	2972.49	744.131	4	20	1.1.1.2509.14	45.5147	70243.1	34886.6	45.44	0.1	2900.66
2	sp|Q9NNW7|TRXR2_DROME; sp|Q9NNW7-2|TRXR2_DROME	Thioredoxin reductase 2, mitochondrial OS=Homo sapiens GN=TXNRD2 PE=1 SV=3; Isoform 2 of Thioredoxin reductase 2, mitochondrial OS=Homo sapiens GN=TXNRD2	0	99	AALLGGLIQDAPNYGWEVAQPVPHDWR			cleaved Q-A@N-term	0.00373442	2972.5	991.84	2972.49	991.838	3	13	1.1.1.2509.24	45.5314	125355	39395.9	45.44	0.1	1865.41
2	sp|Q9NNW7|TRXR2_DROME; sp|Q9NNW7-2|TRXR2_DROME	Thioredoxin reductase 2, mitochondrial OS=Homo sapiens GN=TXNRD2 PE=1 SV=3; Isoform 2 of Thioredoxin reductase 2, mitochondrial OS=Homo sapiens GN=TXNRD2	0	99	AGVDTSPDTQK	Cation:Na(D)@4			0.00275765	1139.51	570.762	1139.51	570.761	2	14	1.1.1.1835.15	12.6316	1151.37	1104.14	12.6	0.15	517.503
2	sp|Q9NNW7|TRXR2_DROME; sp|Q9NNW7-2|TRXR2_DROME	Thioredoxin reductase 2, mitochondrial OS=Homo sapiens GN=TXNRD2 PE=1 SV=3; Isoform 2 of Thioredoxin reductase 2, mitochondrial OS=Homo sapiens GN=TXNRD2	0	99	AGVDTSPDTQK				0.00104139	1117.53	559.77	1117.53	559.77	2	17	1.1.1.1836.2	12.6905	473822	260158	12.6	0.2	144994
2	sp|Q9NNW7|TRXR2_DROME; sp|Q9NNW7-2|TRXR2_DROME	Thioredoxin reductase 2, mitochondrial OS=Homo sapiens GN=TXNRD2 PE=1 SV=3; Isoform 2 of Thioredoxin reductase 2, mitochondrial OS=Homo sapiens GN=TXNRD2	0	99	ALLGGLIQDAPNYGWEVAQPVPHDWR			cleaved A-A@N-term	-0.000995165	2901.46	968.159	2901.46	968.159	3	24	1.1.1.2503.16	45.2349	315785	297021	45.25	0.1	38919.1
2	sp|Q9NNW7|TRXR2_DROME; sp|Q9NNW7-2|TRXR2_DROME	Thioredoxin reductase 2, mitochondrial OS=Homo sapiens GN=TXNRD2 PE=1 SV=3; Isoform 2 of Thioredoxin reductase 2, mitochondrial OS=Homo sapiens GN=TXNRD2	0	99	ALLGGLIQDAPNYGWEVAQPVPHDWR			cleaved A-A@N-term	-0.000995165	2901.46	968.159	2901.46	968.159	3	24	1.1.1.2504.16	45.2842	315785	312676	45.25	0.1	28442.7
2	sp|Q9NNW7|TRXR2_DROME; sp|Q9NNW7-2|TRXR2_DROME	Thioredoxin reductase 2, mitochondrial OS=Homo sapiens GN=TXNRD2 PE=1 SV=3; Isoform 2 of Thioredoxin reductase 2, mitochondrial OS=Homo sapiens GN=TXNRD2	0	99	ALLGGLIQDAPNYGWEVAQPVPHDWR			cleaved A-A@N-term	-0.000995165	2901.46	968.159	2901.46	968.159	3	23	1.1.1.2505.18	45.3269	315785	191151	45.25	0.1	9398.57
2	sp|Q9NNW7|TRXR2_DROME; sp|Q9NNW7-2|TRXR2_DROME	Thioredoxin reductase 2, mitochondrial OS=Homo sapiens GN=TXNRD2 PE=1 SV=3; Isoform 2 of Thioredoxin reductase 2, mitochondrial OS=Homo sapiens GN=TXNRD2	0	99	ASFVDEHTVC	Carbamidomethyl(C)@10		cleaved C-G@C-term	0.000298592	1163.49	582.753	1163.49	582.753	2	17	1.1.1.2095.20	25.1692	194703	179905	25.14	0.2	37153.5
2	sp|Q9NNW7|TRXR2_DROME; sp|Q9NNW7-2|TRXR2_DROME	Thioredoxin reductase 2, mitochondrial OS=Homo sapiens GN=TXNRD2 PE=1 SV=3; Isoform 2 of Thioredoxin reductase 2, mitochondrial OS=Homo sapiens GN=TXNRD2	0	99	ASFVDEHTVC	Carbamidomethyl(C)@10		cleaved C-G@C-term	0.000298592	1163.49	582.753	1163.49	582.753	2	17	1.1.1.2096.6	25.2034	194703	154099	25.14	0.2	29163.5
2	sp|Q9NNW7|TRXR2_DROME; sp|Q9NNW7-2|TRXR2_DROME	Thioredoxin reductase 2, mitochondrial OS=Homo sapiens GN=TXNRD2 PE=1 SV=3; Isoform 2 of Thioredoxin reductase 2, mitochondrial OS=Homo sapiens GN=TXNRD2	0	99	ASFVDEHTVCGVAK	Carbamidomethyl(C)@10			-0.00121759	1518.71	760.364	1518.71	760.364	2	25	1.1.1.2116.9	26.2096	188001	183644	26.17	0.39	30118.3
2	sp|Q9NNW7|TRXR2_DROME; sp|Q9NNW7-2|TRXR2_DROME	Thioredoxin reductase 2, mitochondrial OS=Homo sapiens GN=TXNRD2 PE=1 SV=3; Isoform 2 of Thioredoxin reductase 2, mitochondrial OS=Homo sapiens GN=TXNRD2	0	99	ASFVDEHTVCGVAK	Carbamidomethyl(C)@10			-0.00121759	1518.71	760.364	1518.71	760.364	2	25	1.1.1.2117.11	26.2473	188001	176235	26.17	0.39	28744.5
2	sp|Q9NNW7|TRXR2_DROME; sp|Q9NNW7-2|TRXR2_DROME	Thioredoxin reductase 2, mitochondrial OS=Homo sapiens GN=TXNRD2 PE=1 SV=3; Isoform 2 of Thioredoxin reductase 2, mitochondrial OS=Homo sapiens GN=TXNRD2	0	99	ASFVDEHTVCGVAK	Carbamidomethyl(C)@10			-0.00121759	1518.71	760.364	1518.71	760.364	2	25	1.1.1.2118.14	26.306	188001	155660	26.17	0.39	22353.2
2	sp|Q9NNW7|TRXR2_DROME; sp|Q9NNW7-2|TRXR2_DROME	Thioredoxin reductase 2, mitochondrial OS=Homo sapiens GN=TXNRD2 PE=1 SV=3; Isoform 2 of Thioredoxin reductase 2, mitochondrial OS=Homo sapiens GN=TXNRD2	0	99	CGASYAQVMR	Carbamidomethyl(C)@1			-4.55495e-05	1141.5	571.758	1141.5	571.758	2	16	1.1.1.2033.21	22.2047	113865	81336.9	22.27	0.1	15051.1
2	sp|Q9NNW7|TRXR2_DROME; sp|Q9NNW7-2|TRXR2_DROME	Thioredoxin reductase 2, mitochondrial OS=Homo sapiens GN=TXNRD2 PE=1 SV=3; Isoform 2 of Thioredoxin reductase 2, mitochondrial OS=Homo sapiens GN=TXNRD2	0	99	CGASYAQVMR	Carbamidomethyl(C)@1			-4.55495e-05	1141.5	571.758	1141.5	571.758	2	17	1.1.1.2034.20	22.2523	113865	107491	22.27	0.1	23019.1
2	sp|Q9NNW7|TRXR2_DROME; sp|Q9NNW7-2|TRXR2_DROME	Thioredoxin reductase 2, mitochondrial OS=Homo sapiens GN=TXNRD2 PE=1 SV=3; Isoform 2 of Thioredoxin reductase 2, mitochondrial OS=Homo sapiens GN=TXNRD2	0	99	CGASYAQVMR	Carbamidomethyl(C)@1			-4.55495e-05	1141.5	571.758	1141.5	571.758	2	17	1.1.1.2035.18	22.2983	113865	94135.8	22.27	0.1	19416
2	sp|Q9NNW7|TRXR2_DROME; sp|Q9NNW7-2|TRXR2_DROME	Thioredoxin reductase 2, mitochondrial OS=Homo sapiens GN=TXNRD2 PE=1 SV=3; Isoform 2 of Thioredoxin reductase 2, mitochondrial OS=Homo sapiens GN=TXNRD2	0	99	DYDLLVVGGGSGGL			cleaved L-A@C-term	0.000423122	1320.66	661.336	1320.66	661.335	2	16	1.1.1.2508.8	45.4552	23633.3	18730.6	45.4	0.15	2351.75
2	sp|Q9NNW7|TRXR2_DROME; sp|Q9NNW7-2|TRXR2_DROME	Thioredoxin reductase 2, mitochondrial OS=Homo sapiens GN=TXNRD2 PE=1 SV=3; Isoform 2 of Thioredoxin reductase 2, mitochondrial OS=Homo sapiens GN=TXNRD2	0	99	DYDLLVVGGGSGGLACAK	Carbamidomethyl(C)@16			0.00202908	1750.86	876.436	1750.86	876.435	2	30	1.1.1.2451.21	42.6612	322709	305747	42.67	0.1	56385.4
2	sp|Q9NNW7|TRXR2_DROME; sp|Q9NNW7-2|TRXR2_DROME	Thioredoxin reductase 2, mitochondrial OS=Homo sapiens GN=TXNRD2 PE=1 SV=3; Isoform 2 of Thioredoxin reductase 2, mitochondrial OS=Homo sapiens GN=TXNRD2	0	99	DYDLLVVGGGSGGLACAK	Carbamidomethyl(C)@16			0.00202908	1750.86	876.436	1750.86	876.435	2	28	1.1.1.2452.16	42.7023	322709	281312	42.67	0.1	42589.8
2	sp|Q9NNW7|TRXR2_DROME; sp|Q9NNW7-2|TRXR2_DROME	Thioredoxin reductase 2, mitochondrial OS=Homo sapiens GN=TXNRD2 PE=1 SV=3; Isoform 2 of Thioredoxin reductase 2, mitochondrial OS=Homo sapiens GN=TXNRD2	0	99	DYDLLVVGGGSGGLACAK	Carbamidomethyl(C)@16			0.00202908	1750.86	876.436	1750.86	876.435	2	27	1.1.1.2453.20	42.7585	322709	170137	42.67	0.1	20600.5
2	sp|Q9NNW7|TRXR2_DROME; sp|Q9NNW7-2|TRXR2_DROME	Thioredoxin reductase 2, mitochondrial OS=Homo sapiens GN=TXNRD2 PE=1 SV=3; Isoform 2 of Thioredoxin reductase 2, mitochondrial OS=Homo sapiens GN=TXNRD2	0	99	DYDLLVVGGGSGGLACAK	Carbamidomethyl(C)@16			0.00202908	1750.86	876.436	1750.86	876.435	2	25	1.1.1.2454.20	42.808	322709	90340.9	42.67	0.1	12859.2
2	sp|Q9NNW7|TRXR2_DROME; sp|Q9NNW7-2|TRXR2_DROME	Thioredoxin reductase 2, mitochondrial OS=Homo sapiens GN=TXNRD2 PE=1 SV=3; Isoform 2 of Thioredoxin reductase 2, mitochondrial OS=Homo sapiens GN=TXNRD2	0	99	DYDLLVVGGGSGGLACAK	Carbamidomethyl(C)@16			0.00202908	1750.86	876.436	1750.86	876.435	2	26	1.1.1.2455.17	42.8525	322709	59767.2	42.67	0.1	7474.46
2	sp|Q9NNW7|TRXR2_DROME; sp|Q9NNW7-2|TRXR2_DROME	Thioredoxin reductase 2, mitochondrial OS=Homo sapiens GN=TXNRD2 PE=1 SV=3; Isoform 2 of Thioredoxin reductase 2, mitochondrial OS=Homo sapiens GN=TXNRD2	0	99	DYDLLVVGGGSGGLACAK	Carbamidomethyl(C)@16			0.00023391	1750.86	876.435	1750.86	876.435	2	18	1.1.1.2486.19	44.3931	7165.86	5600.43	44.31	0.64	2930.52
2	sp|Q9NNW7|TRXR2_DROME; sp|Q9NNW7-2|TRXR2_DROME	Thioredoxin reductase 2, mitochondrial OS=Homo sapiens GN=TXNRD2 PE=1 SV=3; Isoform 2 of Thioredoxin reductase 2, mitochondrial OS=Homo sapiens GN=TXNRD2	0	99	DYDLLVVGGGSGGLACAK	Carbamidomethyl(C)@16			0.00023391	1750.86	876.435	1750.86	876.435	2	14	1.1.1.2500.20	45.0804	6378.45	5849.43	45.14	0.64	4310.02
2	sp|Q9NNW7|TRXR2_DROME; sp|Q9NNW7-2|TRXR2_DROME	Thioredoxin reductase 2, mitochondrial OS=Homo sapiens GN=TXNRD2 PE=1 SV=3; Isoform 2 of Thioredoxin reductase 2, mitochondrial OS=Homo sapiens GN=TXNRD2	0	99	DYDLLVVGGGSGGLACAK	Carbamidomethyl(C)@16			-0.00159714	1750.85	876.434	1750.86	876.435	2	16	1.1.1.2585.13	49.187	1440.34	1299.43	49.21	0.65	708.681
2	sp|Q9NNW7|TRXR2_DROME; sp|Q9NNW7-2|TRXR2_DROME	Thioredoxin reductase 2, mitochondrial OS=Homo sapiens GN=TXNRD2 PE=1 SV=3; Isoform 2 of Thioredoxin reductase 2, mitochondrial OS=Homo sapiens GN=TXNRD2	0	99	DYDLLVVGGGSGGLACAK	Carbamidomethyl(C)@16			-0.00159714	1750.85	876.434	1750.86	876.435	2	11	1.1.1.2588.8	49.3455	1440.34	771.28	49.21	0.65	582.369
2	sp|Q9NNW7|TRXR2_DROME; sp|Q9NNW7-2|TRXR2_DROME	Thioredoxin reductase 2, mitochondrial OS=Homo sapiens GN=TXNRD2 PE=1 SV=3; Isoform 2 of Thioredoxin reductase 2, mitochondrial OS=Homo sapiens GN=TXNRD2	0	99	DYDLLVVGGGSGGLACAK	Carbamidomethyl(C)@16			-0.0001323	1750.86	876.435	1750.86	876.435	2	14	1.1.1.2596.15	49.7027	1146.81	608.33	49.51	0.35	415.515
2	sp|Q9NNW7|TRXR2_DROME; sp|Q9NNW7-2|TRXR2_DROME	Thioredoxin reductase 2, mitochondrial OS=Homo sapiens GN=TXNRD2 PE=1 SV=3; Isoform 2 of Thioredoxin reductase 2, mitochondrial OS=Homo sapiens GN=TXNRD2	0	99	DYDLLVVGGGSGGLACAK	Carbamidomethyl(C)@16			-0.00171921	1750.85	876.434	1750.86	876.435	2	13	1.1.1.2682.24	53.8278	527.38	391.39	53.79	0.15	337.887
2	sp|Q9NNW7|TRXR2_DROME; sp|Q9NNW7-2|TRXR2_DROME	Thioredoxin reductase 2, mitochondrial OS=Homo sapiens GN=TXNRD2 PE=1 SV=3; Isoform 2 of Thioredoxin reductase 2, mitochondrial OS=Homo sapiens GN=TXNRD2	0	99	DYDLLVVGGGSGGLACAK	Carbamidomethyl(C)@16			0.00350872	1750.86	584.627	1750.86	584.626	3	10	1.1.1.2460.4	43.0778	11375.6	8954.95	42.97	0.3	781.431
2	sp|Q9NNW7|TRXR2_DROME; sp|Q9NNW7-2|TRXR2_DROME	Thioredoxin reductase 2, mitochondrial OS=Homo sapiens GN=TXNRD2 PE=1 SV=3; Isoform 2 of Thioredoxin reductase 2, mitochondrial OS=Homo sapiens GN=TXNRD2	0	99	EATSVPHIY	Glu->pyro-Glu@N-term		cleaved Y-A@C-term	-0.00100892	997.486	499.75	997.487	499.751	2	11	1.1.1.2144.3	27.5561	24674.6	23782.9	27.6	0.34	663.586
2	sp|Q9NNW7|TRXR2_DROME; sp|Q9NNW7-2|TRXR2_DROME	Thioredoxin reductase 2, mitochondrial OS=Homo sapiens GN=TXNRD2 PE=1 SV=3; Isoform 2 of Thioredoxin reductase 2, mitochondrial OS=Homo sapiens GN=TXNRD2	0	99	ECAGFLTGIGLDTTIM	Carbamidomethyl(C)@2		cleaved L-E@N-term; cleaved M-M@C-term	0.00131383	1697.8	849.908	1697.8	849.907	2	14	1.1.1.2541.10	47.0931	27039.8	13244.2	47.18	0.15	1689.07
2	sp|Q9NNW7|TRXR2_DROME; sp|Q9NNW7-2|TRXR2_DROME	Thioredoxin reductase 2, mitochondrial OS=Homo sapiens GN=TXNRD2 PE=1 SV=3; Isoform 2 of Thioredoxin reductase 2, mitochondrial OS=Homo sapiens GN=TXNRD2	0	99	ECAGFLTGIGLDTTIM	Carbamidomethyl(C)@2		cleaved L-E@N-term; cleaved M-M@C-term	0.00131383	1697.8	849.908	1697.8	849.907	2	13	1.1.1.2544.18	47.2525	27039.8	20260.8	47.18	0.15	2330.3
2	sp|Q9NNW7|TRXR2_DROME; sp|Q9NNW7-2|TRXR2_DROME	Thioredoxin reductase 2, mitochondrial OS=Homo sapiens GN=TXNRD2 PE=1 SV=3; Isoform 2 of Thioredoxin reductase 2, mitochondrial OS=Homo sapiens GN=TXNRD2	0	99	ECAGFLTGIGLDTTIM	Carbamidomethyl(C)@2		cleaved L-E@N-term; cleaved M-M@C-term	0.00131383	1697.8	849.908	1697.8	849.907	2	12	1.1.1.2545.18	47.3023	27039.8	13614.7	47.18	0.15	1756.22
2	sp|Q9NNW7|TRXR2_DROME; sp|Q9NNW7-2|TRXR2_DROME	Thioredoxin reductase 2, mitochondrial OS=Homo sapiens GN=TXNRD2 PE=1 SV=3; Isoform 2 of Thioredoxin reductase 2, mitochondrial OS=Homo sapiens GN=TXNRD2	0	99	ECAGFLTGIGLDTTIMMR	Carbamidomethyl(C)@2		cleaved L-E@N-term	-0.000832442	1984.94	662.654	1984.94	662.655	3	12	1.1.1.2518.5	45.9459	13991.8	10399.4	45.99	0.15	2133.38
2	sp|Q9NNW7|TRXR2_DROME; sp|Q9NNW7-2|TRXR2_DROME	Thioredoxin reductase 2, mitochondrial OS=Homo sapiens GN=TXNRD2 PE=1 SV=3; Isoform 2 of Thioredoxin reductase 2, mitochondrial OS=Homo sapiens GN=TXNRD2	0	99	ECAGFLTGIGLDTTIMMR	Carbamidomethyl(C)@2		cleaved L-E@N-term	-0.00146102	1984.94	993.477	1984.94	993.478	2	15	1.1.1.2519.26	46.0305	16741.4	14465	45.99	0.15	3296.74
2	sp|Q9NNW7|TRXR2_DROME; sp|Q9NNW7-2|TRXR2_DROME	Thioredoxin reductase 2, mitochondrial OS=Homo sapiens GN=TXNRD2 PE=1 SV=3; Isoform 2 of Thioredoxin reductase 2, mitochondrial OS=Homo sapiens GN=TXNRD2	0	99	ECAGFLTGIGLDTTIMMR	Carbamidomethyl(C)@2		cleaved L-E@N-term	-0.000832442	1984.94	662.654	1984.94	662.655	3	17	1.1.1.2520.3	46.0418	13991.8	12727.2	45.99	0.15	1555.55
2	sp|Q9NNW7|TRXR2_DROME; sp|Q9NNW7-2|TRXR2_DROME	Thioredoxin reductase 2, mitochondrial OS=Homo sapiens GN=TXNRD2 PE=1 SV=3; Isoform 2 of Thioredoxin reductase 2, mitochondrial OS=Homo sapiens GN=TXNRD2	0	99	EDTGTFDTVLW	HNE(L)@10	HNE(L)@313	cleaved W-A@C-term	-0.0126208	1438.67	720.344	1438.69	720.351	2	14	1.1.1.2450.13	42.5985	60624.9	48738.3	42.57	0.15	5596.38
2	sp|Q9NNW7|TRXR2_DROME; sp|Q9NNW7-2|TRXR2_DROME	Thioredoxin reductase 2, mitochondrial OS=Homo sapiens GN=TXNRD2 PE=1 SV=3; Isoform 2 of Thioredoxin reductase 2, mitochondrial OS=Homo sapiens GN=TXNRD2	0	99	EILLSADHIIIA			cleaved A-T@C-term	0.00117805	1306.75	654.383	1306.75	654.382	2	16	1.1.1.2476.6	43.8721	130549	118719	43.85	0.1	17944.9
2	sp|Q9NNW7|TRXR2_DROME; sp|Q9NNW7-2|TRXR2_DROME	Thioredoxin reductase 2, mitochondrial OS=Homo sapiens GN=TXNRD2 PE=1 SV=3; Isoform 2 of Thioredoxin reductase 2, mitochondrial OS=Homo sapiens GN=TXNRD2	0	99	EILLSADHIIIA			cleaved A-T@C-term	0.00117805	1306.75	654.383	1306.75	654.382	2	14	1.1.1.2477.6	43.9218	130549	64873.5	43.85	0.1	4376.32
2	sp|Q9NNW7|TRXR2_DROME; sp|Q9NNW7-2|TRXR2_DROME	Thioredoxin reductase 2, mitochondrial OS=Homo sapiens GN=TXNRD2 PE=1 SV=3; Isoform 2 of Thioredoxin reductase 2, mitochondrial OS=Homo sapiens GN=TXNRD2	0	99	EILLSADHIIIAT			cleaved T-G@C-term	0.000691079	1407.8	704.906	1407.8	704.906	2	13	1.1.1.2478.10	43.9778	120957	97756.8	43.92	0.1	4165.54
2	sp|Q9NNW7|TRXR2_DROME; sp|Q9NNW7-2|TRXR2_DROME	Thioredoxin reductase 2, mitochondrial OS=Homo sapiens GN=TXNRD2 PE=1 SV=3; Isoform 2 of Thioredoxin reductase 2, mitochondrial OS=Homo sapiens GN=TXNRD2	0	99	EILLSADHIIIATGGR			cleaved R-P@C-term	-0.00291418	1677.94	560.32	1677.94	560.321	3	23	1.1.1.2434.6	41.7984	148957	108489	41.84	0.15	23924.6
2	sp|Q9NNW7|TRXR2_DROME; sp|Q9NNW7-2|TRXR2_DROME	Thioredoxin reductase 2, mitochondrial OS=Homo sapiens GN=TXNRD2 PE=1 SV=3; Isoform 2 of Thioredoxin reductase 2, mitochondrial OS=Homo sapiens GN=TXNRD2	0	99	EILLSADHIIIATGGR			cleaved R-P@C-term	-0.00291418	1677.94	560.32	1677.94	560.321	3	23	1.1.1.2435.4	41.8442	148957	147639	41.84	0.15	31944.4
2	sp|Q9NNW7|TRXR2_DROME; sp|Q9NNW7-2|TRXR2_DROME	Thioredoxin reductase 2, mitochondrial OS=Homo sapiens GN=TXNRD2 PE=1 SV=3; Isoform 2 of Thioredoxin reductase 2, mitochondrial OS=Homo sapiens GN=TXNRD2	0	99	EILLSADHIIIATGGR			cleaved R-P@C-term	-0.00291418	1677.94	560.32	1677.94	560.321	3	22	1.1.1.2436.5	41.895	148957	130960	41.84	0.15	22366.4
2	sp|Q9NNW7|TRXR2_DROME; sp|Q9NNW7-2|TRXR2_DROME	Thioredoxin reductase 2, mitochondrial OS=Homo sapiens GN=TXNRD2 PE=1 SV=3; Isoform 2 of Thioredoxin reductase 2, mitochondrial OS=Homo sapiens GN=TXNRD2	0	99	EILLSADHIIIATGGR			cleaved R-P@C-term	-0.00291418	1677.94	560.32	1677.94	560.321	3	17	1.1.1.2438.5	41.9935	148957	43517.7	41.84	0.15	9275.19
2	sp|Q9NNW7|TRXR2_DROME; sp|Q9NNW7-2|TRXR2_DROME	Thioredoxin reductase 2, mitochondrial OS=Homo sapiens GN=TXNRD2 PE=1 SV=3; Isoform 2 of Thioredoxin reductase 2, mitochondrial OS=Homo sapiens GN=TXNRD2	0	99	EILLSADHIIIATGGR			cleaved R-P@C-term	-0.00291418	1677.94	560.32	1677.94	560.321	3	14	1.1.1.2445.3	42.335	148957	7197.08	41.84	0.15	2245.86
2	sp|Q9NNW7|TRXR2_DROME; sp|Q9NNW7-2|TRXR2_DROME	Thioredoxin reductase 2, mitochondrial OS=Homo sapiens GN=TXNRD2 PE=1 SV=3; Isoform 2 of Thioredoxin reductase 2, mitochondrial OS=Homo sapiens GN=TXNRD2	0	99	EILLSADHIIIATGGR			cleaved R-P@C-term	-0.00291418	1677.94	560.32	1677.94	560.321	3	15	1.1.1.2439.3	42.0395	148957	33809	41.84	0.15	8923.98
2	sp|Q9NNW7|TRXR2_DROME; sp|Q9NNW7-2|TRXR2_DROME	Thioredoxin reductase 2, mitochondrial OS=Homo sapiens GN=TXNRD2 PE=1 SV=3; Isoform 2 of Thioredoxin reductase 2, mitochondrial OS=Homo sapiens GN=TXNRD2	0	99	EILLSADHIIIATGGRPR				0.00067486	1931.1	644.706	1931.1	644.706	3	18	1.1.1.2381.5	39.1998	271848	14229.8	38.54	0.2	4776.38
2	sp|Q9NNW7|TRXR2_DROME; sp|Q9NNW7-2|TRXR2_DROME	Thioredoxin reductase 2, mitochondrial OS=Homo sapiens GN=TXNRD2 PE=1 SV=3; Isoform 2 of Thioredoxin reductase 2, mitochondrial OS=Homo sapiens GN=TXNRD2	0	99	EILLSADHIIIATGGRPR				0.00067486	1931.1	644.706	1931.1	644.706	3	17	1.1.1.2383.10	39.3005	271848	10169.6	38.54	0.2	4458.74
2	sp|Q9NNW7|TRXR2_DROME; sp|Q9NNW7-2|TRXR2_DROME	Thioredoxin reductase 2, mitochondrial OS=Homo sapiens GN=TXNRD2 PE=1 SV=3; Isoform 2 of Thioredoxin reductase 2, mitochondrial OS=Homo sapiens GN=TXNRD2	0	99	EILLSADHIIIATGGRPR	Glu->pyro-Glu@N-term			0.00184843	1913.09	638.703	1913.08	638.702	3	13	1.1.1.2468.6	43.476	15451.5	15141.9	43.47	0.1	4437.51
2	sp|Q9NNW7|TRXR2_DROME; sp|Q9NNW7-2|TRXR2_DROME	Thioredoxin reductase 2, mitochondrial OS=Homo sapiens GN=TXNRD2 PE=1 SV=3; Isoform 2 of Thioredoxin reductase 2, mitochondrial OS=Homo sapiens GN=TXNRD2	0	99	EILLSADHIIIATGGRPR	Glu->pyro-Glu@N-term			0.00184843	1913.09	638.703	1913.08	638.702	3	12	1.1.1.2469.7	43.5273	15451.5	11387.3	43.47	0.1	1710.27
2	sp|Q9NNW7|TRXR2_DROME; sp|Q9NNW7-2|TRXR2_DROME	Thioredoxin reductase 2, mitochondrial OS=Homo sapiens GN=TXNRD2 PE=1 SV=3; Isoform 2 of Thioredoxin reductase 2, mitochondrial OS=Homo sapiens GN=TXNRD2	0	99	EPPQLVLGL			cleaved L-H@C-term	0.000168751	964.559	483.287	964.559	483.287	2	12	1.1.1.2490.2	44.5574	327117	128648	44.65	0.15	10673.6
2	sp|Q9NNW7|TRXR2_DROME; sp|Q9NNW7-2|TRXR2_DROME	Thioredoxin reductase 2, mitochondrial OS=Homo sapiens GN=TXNRD2 PE=1 SV=3; Isoform 2 of Thioredoxin reductase 2, mitochondrial OS=Homo sapiens GN=TXNRD2	0	99	EPPQLVLGL			cleaved L-H@C-term	0.000168751	964.559	483.287	964.559	483.287	2	14	1.1.1.2491.3	44.6084	327117	257219	44.65	0.15	44332
2	sp|Q9NNW7|TRXR2_DROME; sp|Q9NNW7-2|TRXR2_DROME	Thioredoxin reductase 2, mitochondrial OS=Homo sapiens GN=TXNRD2 PE=1 SV=3; Isoform 2 of Thioredoxin reductase 2, mitochondrial OS=Homo sapiens GN=TXNRD2	0	99	EPPQLVLGL			cleaved L-H@C-term	0.000168751	964.559	483.287	964.559	483.287	2	14	1.1.1.2492.3	44.6576	327117	322205	44.65	0.15	48777.9
2	sp|Q9NNW7|TRXR2_DROME; sp|Q9NNW7-2|TRXR2_DROME	Thioredoxin reductase 2, mitochondrial OS=Homo sapiens GN=TXNRD2 PE=1 SV=3; Isoform 2 of Thioredoxin reductase 2, mitochondrial OS=Homo sapiens GN=TXNRD2	0	99	EPPQLVLGL			cleaved L-H@C-term	0.000168751	964.559	483.287	964.559	483.287	2	12	1.1.1.2494.2	44.7547	327117	169455	44.65	0.15	19149.7
2	sp|Q9NNW7|TRXR2_DROME; sp|Q9NNW7-2|TRXR2_DROME	Thioredoxin reductase 2, mitochondrial OS=Homo sapiens GN=TXNRD2 PE=1 SV=3; Isoform 2 of Thioredoxin reductase 2, mitochondrial OS=Homo sapiens GN=TXNRD2	0	99	EPPQLVLGL			cleaved L-H@C-term	0.000168751	964.559	483.287	964.559	483.287	2	11	1.1.1.2495.2	44.8041	327117	83922.9	44.65	0.15	8461.24
2	sp|Q9NNW7|TRXR2_DROME; sp|Q9NNW7-2|TRXR2_DROME	Thioredoxin reductase 2, mitochondrial OS=Homo sapiens GN=TXNRD2 PE=1 SV=3; Isoform 2 of Thioredoxin reductase 2, mitochondrial OS=Homo sapiens GN=TXNRD2	0	99	EPPQLVLGL			cleaved L-H@C-term	0.000168751	964.559	483.287	964.559	483.287	2	11	1.1.1.2496.4	44.8566	327117	32452.3	44.65	0.15	3307.18
2	sp|Q9NNW7|TRXR2_DROME; sp|Q9NNW7-2|TRXR2_DROME	Thioredoxin reductase 2, mitochondrial OS=Homo sapiens GN=TXNRD2 PE=1 SV=3; Isoform 2 of Thioredoxin reductase 2, mitochondrial OS=Homo sapiens GN=TXNRD2	0	99	EPPQLVLGLH			cleaved H-F@C-term	0.000674128	1101.62	551.817	1101.62	551.816	2	13	1.1.1.2361.8	38.2101	119766	77567.2	38.05	0.35	10810.2
2	sp|Q9NNW7|TRXR2_DROME; sp|Q9NNW7-2|TRXR2_DROME	Thioredoxin reductase 2, mitochondrial OS=Homo sapiens GN=TXNRD2 PE=1 SV=3; Isoform 2 of Thioredoxin reductase 2, mitochondrial OS=Homo sapiens GN=TXNRD2	0	99	EPPQLVLGLH			cleaved H-F@C-term	0.000674128	1101.62	551.817	1101.62	551.816	2	15	1.1.1.2357.10	38.0162	119766	114298	38.05	0.35	17686.5
2	sp|Q9NNW7|TRXR2_DROME; sp|Q9NNW7-2|TRXR2_DROME	Thioredoxin reductase 2, mitochondrial OS=Homo sapiens GN=TXNRD2 PE=1 SV=3; Isoform 2 of Thioredoxin reductase 2, mitochondrial OS=Homo sapiens GN=TXNRD2	0	99	EPPQLVLGLH			cleaved H-F@C-term	0.000674128	1101.62	551.817	1101.62	551.816	2	13	1.1.1.2362.6	38.2559	119766	61057.8	38.05	0.35	10542
2	sp|Q9NNW7|TRXR2_DROME; sp|Q9NNW7-2|TRXR2_DROME	Thioredoxin reductase 2, mitochondrial OS=Homo sapiens GN=TXNRD2 PE=1 SV=3; Isoform 2 of Thioredoxin reductase 2, mitochondrial OS=Homo sapiens GN=TXNRD2	0	99	EPPQLVLGLH			cleaved H-F@C-term	0.000674128	1101.62	551.817	1101.62	551.816	2	13	1.1.1.2360.5	38.1559	119766	96130.1	38.05	0.35	13524
2	sp|Q9NNW7|TRXR2_DROME; sp|Q9NNW7-2|TRXR2_DROME	Thioredoxin reductase 2, mitochondrial OS=Homo sapiens GN=TXNRD2 PE=1 SV=3; Isoform 2 of Thioredoxin reductase 2, mitochondrial OS=Homo sapiens GN=TXNRD2	0	99	EPPQLVLGLH			cleaved H-F@C-term	0.000674128	1101.62	551.817	1101.62	551.816	2	14	1.1.1.2354.7	37.8627	119766	52836.8	38.05	0.35	11295.4
2	sp|Q9NNW7|TRXR2_DROME; sp|Q9NNW7-2|TRXR2_DROME	Thioredoxin reductase 2, mitochondrial OS=Homo sapiens GN=TXNRD2 PE=1 SV=3; Isoform 2 of Thioredoxin reductase 2, mitochondrial OS=Homo sapiens GN=TXNRD2	0	99	EPPQLVLGLH			cleaved H-F@C-term	0.000674128	1101.62	551.817	1101.62	551.816	2	13	1.1.1.2356.12	37.9701	119766	100345	38.05	0.35	14293.9
2	sp|Q9NNW7|TRXR2_DROME; sp|Q9NNW7-2|TRXR2_DROME	Thioredoxin reductase 2, mitochondrial OS=Homo sapiens GN=TXNRD2 PE=1 SV=3; Isoform 2 of Thioredoxin reductase 2, mitochondrial OS=Homo sapiens GN=TXNRD2	0	99	EPPQLVLGLHFLGPNAGEVTQGFALGIK				-0.00066314	2901.57	968.199	2901.58	968.199	3	14	1.1.1.2529.13	46.5203	24708.8	17594.3	46.48	0.1	1950.8
2	sp|Q9NNW7|TRXR2_DROME; sp|Q9NNW7-2|TRXR2_DROME	Thioredoxin reductase 2, mitochondrial OS=Homo sapiens GN=TXNRD2 PE=1 SV=3; Isoform 2 of Thioredoxin reductase 2, mitochondrial OS=Homo sapiens GN=TXNRD2	0	99	EYGCVGLSEEEAVAR	Carbamidomethyl(C)@4		cleaved L-E@N-term	-0.00113202	1667.75	834.88	1667.75	834.88	2	22	1.1.1.2239.16	32.2675	95610.1	45885.4	32.42	0.3	7803.42
2	sp|Q9NNW7|TRXR2_DROME; sp|Q9NNW7-2|TRXR2_DROME	Thioredoxin reductase 2, mitochondrial OS=Homo sapiens GN=TXNRD2 PE=1 SV=3; Isoform 2 of Thioredoxin reductase 2, mitochondrial OS=Homo sapiens GN=TXNRD2	0	99	EYGCVGLSEEEAVAR	Carbamidomethyl(C)@4		cleaved L-E@N-term	-0.00113202	1667.75	834.88	1667.75	834.88	2	22	1.1.1.2240.24	32.3168	95610.1	73843.3	32.42	0.3	14797.2
2	sp|Q9NNW7|TRXR2_DROME; sp|Q9NNW7-2|TRXR2_DROME	Thioredoxin reductase 2, mitochondrial OS=Homo sapiens GN=TXNRD2 PE=1 SV=3; Isoform 2 of Thioredoxin reductase 2, mitochondrial OS=Homo sapiens GN=TXNRD2	0	99	EYGCVGLSEEEAVAR	Carbamidomethyl(C)@4		cleaved L-E@N-term	-0.00113202	1667.75	834.88	1667.75	834.88	2	22	1.1.1.2241.24	32.3662	95610.1	92114.6	32.42	0.3	18147.2
2	sp|Q9NNW7|TRXR2_DROME; sp|Q9NNW7-2|TRXR2_DROME	Thioredoxin reductase 2, mitochondrial OS=Homo sapiens GN=TXNRD2 PE=1 SV=3; Isoform 2 of Thioredoxin reductase 2, mitochondrial OS=Homo sapiens GN=TXNRD2	0	99	EYGCVGLSEEEAVAR	Carbamidomethyl(C)@4		cleaved L-E@N-term	-0.00113202	1667.75	834.88	1667.75	834.88	2	23	1.1.1.2242.26	32.4188	95610.1	95534.4	32.42	0.3	16853.8
2	sp|Q9NNW7|TRXR2_DROME; sp|Q9NNW7-2|TRXR2_DROME	Thioredoxin reductase 2, mitochondrial OS=Homo sapiens GN=TXNRD2 PE=1 SV=3; Isoform 2 of Thioredoxin reductase 2, mitochondrial OS=Homo sapiens GN=TXNRD2	0	99	EYGCVGLSEEEAVAR	Carbamidomethyl(C)@4		cleaved L-E@N-term	-0.00113202	1667.75	834.88	1667.75	834.88	2	23	1.1.1.2243.20	32.4612	95610.1	83331.1	32.42	0.3	15059.5
2	sp|Q9NNW7|TRXR2_DROME; sp|Q9NNW7-2|TRXR2_DROME	Thioredoxin reductase 2, mitochondrial OS=Homo sapiens GN=TXNRD2 PE=1 SV=3; Isoform 2 of Thioredoxin reductase 2, mitochondrial OS=Homo sapiens GN=TXNRD2	0	99	EYGCVGLSEEEAVAR	Carbamidomethyl(C)@4		cleaved L-E@N-term	-0.00113202	1667.75	834.88	1667.75	834.88	2	25	1.1.1.2244.16	32.5172	95610.1	65892.9	32.42	0.3	11254.4
2	sp|Q9NNW7|TRXR2_DROME; sp|Q9NNW7-2|TRXR2_DROME	Thioredoxin reductase 2, mitochondrial OS=Homo sapiens GN=TXNRD2 PE=1 SV=3; Isoform 2 of Thioredoxin reductase 2, mitochondrial OS=Homo sapiens GN=TXNRD2	0	99	EYGCVGLSEEEAVAR	Carbamidomethyl(C)@4		cleaved L-E@N-term	-0.00113202	1667.75	834.88	1667.75	834.88	2	23	1.1.1.2245.20	32.5665	95610.1	49468.4	32.42	0.3	8461.38
2	sp|Q9NNW7|TRXR2_DROME; sp|Q9NNW7-2|TRXR2_DROME	Thioredoxin reductase 2, mitochondrial OS=Homo sapiens GN=TXNRD2 PE=1 SV=3; Isoform 2 of Thioredoxin reductase 2, mitochondrial OS=Homo sapiens GN=TXNRD2	0	99	EYGCVGLSEEEAVAR	Carbamidomethyl(C)@4		cleaved L-E@N-term	-0.00113202	1667.75	834.88	1667.75	834.88	2	23	1.1.1.2246.20	32.616	95610.1	41050.4	32.42	0.3	6573.6
2	sp|Q9NNW7|TRXR2_DROME; sp|Q9NNW7-2|TRXR2_DROME	Thioredoxin reductase 2, mitochondrial OS=Homo sapiens GN=TXNRD2 PE=1 SV=3; Isoform 2 of Thioredoxin reductase 2, mitochondrial OS=Homo sapiens GN=TXNRD2	0	99	EYGCVGLSEEEAVAR	Carbamidomethyl(C)@4		cleaved L-E@N-term	-0.00113202	1667.75	834.88	1667.75	834.88	2	19	1.1.1.2248.16	32.7148	95610.1	24625.6	32.42	0.3	3950.8
2	sp|Q9NNW7|TRXR2_DROME; sp|Q9NNW7-2|TRXR2_DROME	Thioredoxin reductase 2, mitochondrial OS=Homo sapiens GN=TXNRD2 PE=1 SV=3; Isoform 2 of Thioredoxin reductase 2, mitochondrial OS=Homo sapiens GN=TXNRD2	0	99	EYGCVGLSEEEAVAR	Carbamidomethyl(C)@4		cleaved L-E@N-term	-0.00113202	1667.75	834.88	1667.75	834.88	2	18	1.1.1.2249.26	32.7645	95610.1	18325.2	32.42	0.3	3501.22
2	sp|Q9NNW7|TRXR2_DROME; sp|Q9NNW7-2|TRXR2_DROME	Thioredoxin reductase 2, mitochondrial OS=Homo sapiens GN=TXNRD2 PE=1 SV=3; Isoform 2 of Thioredoxin reductase 2, mitochondrial OS=Homo sapiens GN=TXNRD2	0	99	EYGCVGLSEEEAVAR	Carbamidomethyl(C)@4		cleaved L-E@N-term	-0.00113202	1667.75	834.88	1667.75	834.88	2	20	1.1.1.2250.25	32.8122	95610.1	14321.6	32.42	0.3	3093.51
2	sp|Q9NNW7|TRXR2_DROME; sp|Q9NNW7-2|TRXR2_DROME	Thioredoxin reductase 2, mitochondrial OS=Homo sapiens GN=TXNRD2 PE=1 SV=3; Isoform 2 of Thioredoxin reductase 2, mitochondrial OS=Homo sapiens GN=TXNRD2	0	99	FLGPNAGEVTQGF			cleaved H-F@N-term; cleaved F-A@C-term	0.00405724	1335.65	668.832	1335.65	668.83	2	21	1.1.1.2452.11	42.694	121219	115762	42.72	0.1	17288
2	sp|Q9NNW7|TRXR2_DROME; sp|Q9NNW7-2|TRXR2_DROME	Thioredoxin reductase 2, mitochondrial OS=Homo sapiens GN=TXNRD2 PE=1 SV=3; Isoform 2 of Thioredoxin reductase 2, mitochondrial OS=Homo sapiens GN=TXNRD2	0	99	FLGPNAGEVTQGF			cleaved H-F@N-term; cleaved F-A@C-term	0.00405724	1335.65	668.832	1335.65	668.83	2	18	1.1.1.2453.8	42.7385	121219	107606	42.72	0.1	11895.9
2	sp|Q9NNW7|TRXR2_DROME; sp|Q9NNW7-2|TRXR2_DROME	Thioredoxin reductase 2, mitochondrial OS=Homo sapiens GN=TXNRD2 PE=1 SV=3; Isoform 2 of Thioredoxin reductase 2, mitochondrial OS=Homo sapiens GN=TXNRD2	0	99	FLGPNAGEVTQGF			cleaved H-F@N-term; cleaved F-A@C-term	0.00405724	1335.65	668.832	1335.65	668.83	2	16	1.1.1.2451.9	42.6412	121219	75423.7	42.72	0.1	7813.51
2	sp|Q9NNW7|TRXR2_DROME; sp|Q9NNW7-2|TRXR2_DROME	Thioredoxin reductase 2, mitochondrial OS=Homo sapiens GN=TXNRD2 PE=1 SV=3; Isoform 2 of Thioredoxin reductase 2, mitochondrial OS=Homo sapiens GN=TXNRD2	0	99	GCVGLSEEEAVAR	Carbamidomethyl(C)@2		cleaved Y-G@N-term	-0.00138012	1375.64	688.827	1375.64	688.827	2	22	1.1.1.2124.10	26.5941	69379.4	60556	26.66	0.15	13698.1
2	sp|Q9NNW7|TRXR2_DROME; sp|Q9NNW7-2|TRXR2_DROME	Thioredoxin reductase 2, mitochondrial OS=Homo sapiens GN=TXNRD2 PE=1 SV=3; Isoform 2 of Thioredoxin reductase 2, mitochondrial OS=Homo sapiens GN=TXNRD2	0	99	GCVGLSEEEAVAR	Carbamidomethyl(C)@2		cleaved Y-G@N-term	-0.00138012	1375.64	688.827	1375.64	688.827	2	22	1.1.1.2125.4	26.6564	69379.4	69258.5	26.66	0.15	17572.3
2	sp|Q9NNW7|TRXR2_DROME; sp|Q9NNW7-2|TRXR2_DROME	Thioredoxin reductase 2, mitochondrial OS=Homo sapiens GN=TXNRD2 PE=1 SV=3; Isoform 2 of Thioredoxin reductase 2, mitochondrial OS=Homo sapiens GN=TXNRD2	0	99	GCVGLSEEEAVAR	Carbamidomethyl(C)@2		cleaved Y-G@N-term	-0.00138012	1375.64	688.827	1375.64	688.827	2	20	1.1.1.2127.8	26.7483	69379.4	36335.2	26.66	0.15	11665.2
2	sp|Q9NNW7|TRXR2_DROME; sp|Q9NNW7-2|TRXR2_DROME	Thioredoxin reductase 2, mitochondrial OS=Homo sapiens GN=TXNRD2 PE=1 SV=3; Isoform 2 of Thioredoxin reductase 2, mitochondrial OS=Homo sapiens GN=TXNRD2	0	99	GFDQQMSSM			cleaved M-V@C-term	0.000430882	1029.39	515.702	1029.39	515.702	2	14	1.1.1.2219.4	31.2586	182588	20177.8	31.49	0.25	2359.02
2	sp|Q9NNW7|TRXR2_DROME; sp|Q9NNW7-2|TRXR2_DROME	Thioredoxin reductase 2, mitochondrial OS=Homo sapiens GN=TXNRD2 PE=1 SV=3; Isoform 2 of Thioredoxin reductase 2, mitochondrial OS=Homo sapiens GN=TXNRD2	0	99	GFDQQMSSM			cleaved M-V@C-term	0.000430882	1029.39	515.702	1029.39	515.702	2	14	1.1.1.2220.3	31.2956	182588	37215.9	31.49	0.25	5200.39
2	sp|Q9NNW7|TRXR2_DROME; sp|Q9NNW7-2|TRXR2_DROME	Thioredoxin reductase 2, mitochondrial OS=Homo sapiens GN=TXNRD2 PE=1 SV=3; Isoform 2 of Thioredoxin reductase 2, mitochondrial OS=Homo sapiens GN=TXNRD2	0	99	GFDQQMSSM			cleaved M-V@C-term	0.000430882	1029.39	515.702	1029.39	515.702	2	14	1.1.1.2221.3	31.3447	182588	66810.8	31.49	0.25	11734.5
2	sp|Q9NNW7|TRXR2_DROME; sp|Q9NNW7-2|TRXR2_DROME	Thioredoxin reductase 2, mitochondrial OS=Homo sapiens GN=TXNRD2 PE=1 SV=3; Isoform 2 of Thioredoxin reductase 2, mitochondrial OS=Homo sapiens GN=TXNRD2	0	99	GFDQQMSSM			cleaved M-V@C-term	0.000430882	1029.39	515.702	1029.39	515.702	2	14	1.1.1.2228.6	31.6955	182588	64808.4	31.49	0.25	12142.1
2	sp|Q9NNW7|TRXR2_DROME; sp|Q9NNW7-2|TRXR2_DROME	Thioredoxin reductase 2, mitochondrial OS=Homo sapiens GN=TXNRD2 PE=1 SV=3; Isoform 2 of Thioredoxin reductase 2, mitochondrial OS=Homo sapiens GN=TXNRD2	0	99	GFDQQMSSM	Dethiomethyl(M)@9		cleaved M-V@C-term	0.00148713	981.388	491.701	981.386	491.7	2	13	1.1.1.2055.3	23.2676	4918.95	3284.69	23.36	0.26	1692.44
2	sp|Q9NNW7|TRXR2_DROME; sp|Q9NNW7-2|TRXR2_DROME	Thioredoxin reductase 2, mitochondrial OS=Homo sapiens GN=TXNRD2 PE=1 SV=3; Isoform 2 of Thioredoxin reductase 2, mitochondrial OS=Homo sapiens GN=TXNRD2	0	99	GFDQQMSSM			cleaved M-V@C-term	0.000430882	1029.39	515.702	1029.39	515.702	2	13	1.1.1.2230.5	31.7992	182588	22879.1	31.49	0.25	3315.58
2	sp|Q9NNW7|TRXR2_DROME; sp|Q9NNW7-2|TRXR2_DROME	Thioredoxin reductase 2, mitochondrial OS=Homo sapiens GN=TXNRD2 PE=1 SV=3; Isoform 2 of Thioredoxin reductase 2, mitochondrial OS=Homo sapiens GN=TXNRD2	0	99	GFDQQMSSMVIEHM			cleaved M-A@C-term	0.00101665	1638.69	820.35	1638.68	820.349	2	22	1.1.1.2472.17	43.6926	133343	122274	43.67	0.1	20231.6
2	sp|Q9NNW7|TRXR2_DROME; sp|Q9NNW7-2|TRXR2_DROME	Thioredoxin reductase 2, mitochondrial OS=Homo sapiens GN=TXNRD2 PE=1 SV=3; Isoform 2 of Thioredoxin reductase 2, mitochondrial OS=Homo sapiens GN=TXNRD2	0	99	GFDQQMSSMVIEHM			cleaved M-A@C-term	0.00101665	1638.69	820.35	1638.68	820.349	2	14	1.1.1.2472.18	43.6943	133343	121645	43.67	0.1	12588
2	sp|Q9NNW7|TRXR2_DROME; sp|Q9NNW7-2|TRXR2_DROME	Thioredoxin reductase 2, mitochondrial OS=Homo sapiens GN=TXNRD2 PE=1 SV=3; Isoform 2 of Thioredoxin reductase 2, mitochondrial OS=Homo sapiens GN=TXNRD2	0	99	GFDQQMSSMVIEHM			cleaved M-A@C-term	0.00101665	1638.69	820.35	1638.68	820.349	2	19	1.1.1.2473.20	43.7471	133343	67896.2	43.67	0.1	5512.17
2	sp|Q9NNW7|TRXR2_DROME; sp|Q9NNW7-2|TRXR2_DROME	Thioredoxin reductase 2, mitochondrial OS=Homo sapiens GN=TXNRD2 PE=1 SV=3; Isoform 2 of Thioredoxin reductase 2, mitochondrial OS=Homo sapiens GN=TXNRD2	0	99	GFDQQMSSMVIEHMASH			cleaved H-G@C-term	0.00130002	1933.81	645.612	1933.81	645.611	3	18	1.1.1.2443.4	42.2384	43447.5	42394.8	42.27	0.1	16022.5
2	sp|Q9NNW7|TRXR2_DROME; sp|Q9NNW7-2|TRXR2_DROME	Thioredoxin reductase 2, mitochondrial OS=Homo sapiens GN=TXNRD2 PE=1 SV=3; Isoform 2 of Thioredoxin reductase 2, mitochondrial OS=Homo sapiens GN=TXNRD2	0	99	GFDQQMSSMVIEHMASHGTR	Oxidation(M)@9			0.000587204	2263.98	567.002	2263.98	567.002	4	19	1.1.1.2331.9	36.777	8540.92	7976.43	36.77	0.1	4294.27
2	sp|Q9NNW7|TRXR2_DROME; sp|Q9NNW7-2|TRXR2_DROME	Thioredoxin reductase 2, mitochondrial OS=Homo sapiens GN=TXNRD2 PE=1 SV=3; Isoform 2 of Thioredoxin reductase 2, mitochondrial OS=Homo sapiens GN=TXNRD2	0	99	GFDQQMSSMVIEHMASHGTR	Oxidation(M)@9			0.000587204	2263.98	567.002	2263.98	567.002	4	15	1.1.1.2332.10	36.828	8540.92	6146.57	36.77	0.1	4449.61
2	sp|Q9NNW7|TRXR2_DROME; sp|Q9NNW7-2|TRXR2_DROME	Thioredoxin reductase 2, mitochondrial OS=Homo sapiens GN=TXNRD2 PE=1 SV=3; Isoform 2 of Thioredoxin reductase 2, mitochondrial OS=Homo sapiens GN=TXNRD2	0	99	GFDQQMSSMVIEHMASHGTR				0.000155599	2247.98	750.335	2247.98	750.335	3	17	1.1.1.2399.16	40.095	112543	101029	40.17	0.25	13278.7
2	sp|Q9NNW7|TRXR2_DROME; sp|Q9NNW7-2|TRXR2_DROME	Thioredoxin reductase 2, mitochondrial OS=Homo sapiens GN=TXNRD2 PE=1 SV=3; Isoform 2 of Thioredoxin reductase 2, mitochondrial OS=Homo sapiens GN=TXNRD2	0	99	GFDQQMSSMVIEHMASHGTR				0.000155599	2247.98	750.335	2247.98	750.335	3	21	1.1.1.2400.12	40.1473	112543	111701	40.17	0.25	21835.2
2	sp|Q9NNW7|TRXR2_DROME; sp|Q9NNW7-2|TRXR2_DROME	Thioredoxin reductase 2, mitochondrial OS=Homo sapiens GN=TXNRD2 PE=1 SV=3; Isoform 2 of Thioredoxin reductase 2, mitochondrial OS=Homo sapiens GN=TXNRD2	0	99	GFDQQMSSMVIEHMASHGTR				0.00355444	2247.99	563.004	2247.98	563.003	4	20	1.1.1.2405.5	40.3721	351770	108913	40.17	0.25	16340.5
2	sp|Q9NNW7|TRXR2_DROME; sp|Q9NNW7-2|TRXR2_DROME	Thioredoxin reductase 2, mitochondrial OS=Homo sapiens GN=TXNRD2 PE=1 SV=3; Isoform 2 of Thioredoxin reductase 2, mitochondrial OS=Homo sapiens GN=TXNRD2	0	99	GFDQQMSSMVIEHMASHGTR				0.00355444	2247.99	563.004	2247.98	563.003	4	19	1.1.1.2406.8	40.4265	351770	44721	40.17	0.25	6334.99
2	sp|Q9NNW7|TRXR2_DROME; sp|Q9NNW7-2|TRXR2_DROME	Thioredoxin reductase 2, mitochondrial OS=Homo sapiens GN=TXNRD2 PE=1 SV=3; Isoform 2 of Thioredoxin reductase 2, mitochondrial OS=Homo sapiens GN=TXNRD2	0	99	GFDQQMSSMVIEHMASHGTR				0.00355444	2247.99	563.004	2247.98	563.003	4	14	1.1.1.2407.3	40.4673	351770	22577.3	40.17	0.25	3094.65
2	sp|Q9NNW7|TRXR2_DROME; sp|Q9NNW7-2|TRXR2_DROME	Thioredoxin reductase 2, mitochondrial OS=Homo sapiens GN=TXNRD2 PE=1 SV=3; Isoform 2 of Thioredoxin reductase 2, mitochondrial OS=Homo sapiens GN=TXNRD2	0	99	GFDQQMSSMVIEHMASHGTR				0.000155599	2247.98	750.335	2247.98	750.335	3	17	1.1.1.2399.17	40.0966	112543	101738	40.17	0.25	16484.8
2	sp|Q9NNW7|TRXR2_DROME; sp|Q9NNW7-2|TRXR2_DROME	Thioredoxin reductase 2, mitochondrial OS=Homo sapiens GN=TXNRD2 PE=1 SV=3; Isoform 2 of Thioredoxin reductase 2, mitochondrial OS=Homo sapiens GN=TXNRD2	0	99	GFDQQMSSMVIEHMASHGTR				0.00355444	2247.99	563.004	2247.98	563.003	4	23	1.1.1.2399.3	40.0733	351770	288911	40.17	0.25	66201.3
2	sp|Q9NNW7|TRXR2_DROME; sp|Q9NNW7-2|TRXR2_DROME	Thioredoxin reductase 2, mitochondrial OS=Homo sapiens GN=TXNRD2 PE=1 SV=3; Isoform 2 of Thioredoxin reductase 2, mitochondrial OS=Homo sapiens GN=TXNRD2	0	99	GFDQQMSSMVIEHMASHGTR				0.00355444	2247.99	563.004	2247.98	563.003	4	22	1.1.1.2398.2	40.0243	351770	184768	40.17	0.25	37952.8
2	sp|Q9NNW7|TRXR2_DROME; sp|Q9NNW7-2|TRXR2_DROME	Thioredoxin reductase 2, mitochondrial OS=Homo sapiens GN=TXNRD2 PE=1 SV=3; Isoform 2 of Thioredoxin reductase 2, mitochondrial OS=Homo sapiens GN=TXNRD2	0	99	GFDQQMSSMVIEHMASHGTR				0.00355444	2247.99	563.004	2247.98	563.003	4	22	1.1.1.2400.5	40.1256	351770	340371	40.17	0.25	73876.2
2	sp|Q9NNW7|TRXR2_DROME; sp|Q9NNW7-2|TRXR2_DROME	Thioredoxin reductase 2, mitochondrial OS=Homo sapiens GN=TXNRD2 PE=1 SV=3; Isoform 2 of Thioredoxin reductase 2, mitochondrial OS=Homo sapiens GN=TXNRD2	0	99	GFLTGIGLDTTIM			cleaved A-G@N-term; cleaved M-M@C-term	-0.000955318	1337.69	669.852	1337.69	669.852	2	14	1.1.1.2543.6	47.1825	25921.1	23569.4	47.17	0.15	2515.33
2	sp|Q9NNW7|TRXR2_DROME; sp|Q9NNW7-2|TRXR2_DROME	Thioredoxin reductase 2, mitochondrial OS=Homo sapiens GN=TXNRD2 PE=1 SV=3; Isoform 2 of Thioredoxin reductase 2, mitochondrial OS=Homo sapiens GN=TXNRD2	0	99	GFLTGIGLDTTIM			cleaved A-G@N-term; cleaved M-M@C-term	-0.000955318	1337.69	669.852	1337.69	669.852	2	11	1.1.1.2544.7	47.2341	25921.1	13023.4	47.17	0.15	1139.89
2	sp|Q9NNW7|TRXR2_DROME; sp|Q9NNW7-2|TRXR2_DROME	Thioredoxin reductase 2, mitochondrial OS=Homo sapiens GN=TXNRD2 PE=1 SV=3; Isoform 2 of Thioredoxin reductase 2, mitochondrial OS=Homo sapiens GN=TXNRD2	0	99	GFLTGIGLDTTIMMR			cleaved A-G@N-term	0.00231835	1624.83	813.424	1624.83	813.423	2	18	1.1.1.2515.19	45.8203	18481.1	17542.5	45.79	0.15	2830.16
2	sp|Q9NNW7|TRXR2_DROME; sp|Q9NNW7-2|TRXR2_DROME	Thioredoxin reductase 2, mitochondrial OS=Homo sapiens GN=TXNRD2 PE=1 SV=3; Isoform 2 of Thioredoxin reductase 2, mitochondrial OS=Homo sapiens GN=TXNRD2	0	99	GFLTGIGLDTTIMMR			cleaved A-G@N-term	0.00231835	1624.83	813.424	1624.83	813.423	2	17	1.1.1.2517.12	45.908	18481.1	9495.94	45.79	0.15	1627.9
2	sp|Q9NNW7|TRXR2_DROME; sp|Q9NNW7-2|TRXR2_DROME	Thioredoxin reductase 2, mitochondrial OS=Homo sapiens GN=TXNRD2 PE=1 SV=3; Isoform 2 of Thioredoxin reductase 2, mitochondrial OS=Homo sapiens GN=TXNRD2	0	99	GGLIQDAPNYGWEVAQPVPHDWR			cleaved L-G@N-term	0.00608256	2604.26	869.093	2604.25	869.091	3	18	1.1.1.2462.22	43.2067	219314	146404	43.16	0.15	8376.65
2	sp|Q9NNW7|TRXR2_DROME; sp|Q9NNW7-2|TRXR2_DROME	Thioredoxin reductase 2, mitochondrial OS=Homo sapiens GN=TXNRD2 PE=1 SV=3; Isoform 2 of Thioredoxin reductase 2, mitochondrial OS=Homo sapiens GN=TXNRD2	0	99	GGLIQDAPNYGWEVAQPVPHDWR			cleaved L-G@N-term	0.00608256	2604.26	869.093	2604.25	869.091	3	21	1.1.1.2461.24	43.1606	219314	217584	43.16	0.15	29737.3
2	sp|Q9NNW7|TRXR2_DROME; sp|Q9NNW7-2|TRXR2_DROME	Thioredoxin reductase 2, mitochondrial OS=Homo sapiens GN=TXNRD2 PE=1 SV=3; Isoform 2 of Thioredoxin reductase 2, mitochondrial OS=Homo sapiens GN=TXNRD2	0	99	GIGLDTTIMMR			cleaved T-G@N-term	-0.000520139	1206.61	604.312	1206.61	604.312	2	13	1.1.1.2414.5	40.8208	20540.9	4212.45	41	0.2	854.364
2	sp|Q9NNW7|TRXR2_DROME; sp|Q9NNW7-2|TRXR2_DROME	Thioredoxin reductase 2, mitochondrial OS=Homo sapiens GN=TXNRD2 PE=1 SV=3; Isoform 2 of Thioredoxin reductase 2, mitochondrial OS=Homo sapiens GN=TXNRD2	0	99	GIHPTCSEEVVK	Carbamidomethyl(C)@6		cleaved V-G@N-term	0.00248889	1354.66	678.336	1354.66	678.335	2	17	1.1.1.2037.25	22.4087	18040.9	15886.9	22.46	0.25	4185.74
2	sp|Q9NNW7|TRXR2_DROME; sp|Q9NNW7-2|TRXR2_DROME	Thioredoxin reductase 2, mitochondrial OS=Homo sapiens GN=TXNRD2 PE=1 SV=3; Isoform 2 of Thioredoxin reductase 2, mitochondrial OS=Homo sapiens GN=TXNRD2	0	99	GITSDDIFWLK			cleaved Y-G@N-term	-0.000715451	1293.66	647.837	1293.66	647.838	2	17	1.1.1.2483.6	44.2183	190520	182078	44.21	0.1	32062.5
2	sp|Q9NNW7|TRXR2_DROME; sp|Q9NNW7-2|TRXR2_DROME	Thioredoxin reductase 2, mitochondrial OS=Homo sapiens GN=TXNRD2 PE=1 SV=3; Isoform 2 of Thioredoxin reductase 2, mitochondrial OS=Homo sapiens GN=TXNRD2	0	99	GLGGTCVNVGCIPK	Carbamidomethyl(C)@6; Carbamidomethyl(C)@11		cleaved W-G@N-term	0.000494943	1430.7	716.358	1430.7	716.358	2	20	1.1.1.2274.20	33.9888	14399.8	13774.5	34	0.2	3639.5
2	sp|Q9NNW7|TRXR2_DROME; sp|Q9NNW7-2|TRXR2_DROME	Thioredoxin reductase 2, mitochondrial OS=Homo sapiens GN=TXNRD2 PE=1 SV=3; Isoform 2 of Thioredoxin reductase 2, mitochondrial OS=Homo sapiens GN=TXNRD2	0	99	GLGGTCVNVGCIPK	Carbamidomethyl(C)@6; Carbamidomethyl(C)@11		cleaved W-G@N-term	0.000494943	1430.7	716.358	1430.7	716.358	2	19	1.1.1.2276.9	34.0869	14399.8	9453.7	34	0.2	2194.98
2	sp|Q9NNW7|TRXR2_DROME; sp|Q9NNW7-2|TRXR2_DROME	Thioredoxin reductase 2, mitochondrial OS=Homo sapiens GN=TXNRD2 PE=1 SV=3; Isoform 2 of Thioredoxin reductase 2, mitochondrial OS=Homo sapiens GN=TXNRD2	0	99	GLHFLGPNAGEVTQGF			cleaved L-G@N-term; cleaved F-A@C-term	0.00078039	1642.81	822.413	1642.81	822.412	2	22	1.1.1.2461.22	43.1573	239971	187545	43.12	0.1	18002.3
2	sp|Q9NNW7|TRXR2_DROME; sp|Q9NNW7-2|TRXR2_DROME	Thioredoxin reductase 2, mitochondrial OS=Homo sapiens GN=TXNRD2 PE=1 SV=3; Isoform 2 of Thioredoxin reductase 2, mitochondrial OS=Homo sapiens GN=TXNRD2	0	99	GLHFLGPNAGEVTQGF	Deamidated(N)@8		cleaved L-G@N-term; cleaved F-A@C-term	0.00419525	1643.8	822.907	1643.79	822.904	2	10	1.1.1.2476.15	43.8871	7034.81	5532.39	43.82	0.15	1252.96
2	sp|Q9NNW7|TRXR2_DROME; sp|Q9NNW7-2|TRXR2_DROME	Thioredoxin reductase 2, mitochondrial OS=Homo sapiens GN=TXNRD2 PE=1 SV=3; Isoform 2 of Thioredoxin reductase 2, mitochondrial OS=Homo sapiens GN=TXNRD2	0	99	GLHFLGPNAGEVTQGF			cleaved L-G@N-term; cleaved F-A@C-term	0.00078039	1642.81	822.413	1642.81	822.412	2	24	1.1.1.2460.19	43.1028	239971	226000	43.12	0.1	40616.7
2	sp|Q9NNW7|TRXR2_DROME; sp|Q9NNW7-2|TRXR2_DROME	Thioredoxin reductase 2, mitochondrial OS=Homo sapiens GN=TXNRD2 PE=1 SV=3; Isoform 2 of Thioredoxin reductase 2, mitochondrial OS=Homo sapiens GN=TXNRD2	0	99	GLSEEEAVAR			cleaved V-G@N-term	0.00158865	1059.52	530.768	1059.52	530.767	2	14	1.1.1.1993.15	20.2681	6748.94	4936.4	20.19	0.15	1538.45
2	sp|Q9NNW7|TRXR2_DROME; sp|Q9NNW7-2|TRXR2_DROME	Thioredoxin reductase 2, mitochondrial OS=Homo sapiens GN=TXNRD2 PE=1 SV=3; Isoform 2 of Thioredoxin reductase 2, mitochondrial OS=Homo sapiens GN=TXNRD2	0	99	GLSEEEAVAR			cleaved V-G@N-term	0.00158865	1059.52	530.768	1059.52	530.767	2	14	1.1.1.1992.16	20.2199	6748.94	6446.38	20.19	0.15	2366.35
2	sp|Q9NNW7|TRXR2_DROME; sp|Q9NNW7-2|TRXR2_DROME	Thioredoxin reductase 2, mitochondrial OS=Homo sapiens GN=TXNRD2 PE=1 SV=3; Isoform 2 of Thioredoxin reductase 2, mitochondrial OS=Homo sapiens GN=TXNRD2	0	99	GPNAGEVTQGF			cleaved L-G@N-term; cleaved F-A@C-term	-0.000420162	1075.49	538.754	1075.49	538.754	2	11	1.1.1.2202.12	30.4283	2036.24	1987.17	30.46	0.25	704.944
2	sp|Q9NNW7|TRXR2_DROME; sp|Q9NNW7-2|TRXR2_DROME	Thioredoxin reductase 2, mitochondrial OS=Homo sapiens GN=TXNRD2 PE=1 SV=3; Isoform 2 of Thioredoxin reductase 2, mitochondrial OS=Homo sapiens GN=TXNRD2	0	99	HAHYKPLEF			cleaved Y-H@N-term; cleaved F-T@C-term	-0.000743566	1140.57	571.293	1140.57	571.293	2	14	1.1.1.2048.8	22.9368	14874.6	11269.5	22.81	0.39	2432.05
2	sp|Q9NNW7|TRXR2_DROME; sp|Q9NNW7-2|TRXR2_DROME	Thioredoxin reductase 2, mitochondrial OS=Homo sapiens GN=TXNRD2 PE=1 SV=3; Isoform 2 of Thioredoxin reductase 2, mitochondrial OS=Homo sapiens GN=TXNRD2	0	99	HAHYKPLEFTVA			cleaved Y-H@N-term; cleaved A-G@C-term	0.000129171	1411.73	706.87	1411.72	706.87	2	12	1.1.1.2183.22	29.5127	10711	4628.58	29.18	0.39	1058.74
2	sp|Q9NNW7|TRXR2_DROME; sp|Q9NNW7-2|TRXR2_DROME	Thioredoxin reductase 2, mitochondrial OS=Homo sapiens GN=TXNRD2 PE=1 SV=3; Isoform 2 of Thioredoxin reductase 2, mitochondrial OS=Homo sapiens GN=TXNRD2	0	99	HFLGPNAGEVTQGF	Deamidated(N)@6		cleaved L-H@N-term; cleaved F-A@C-term	0.00167471	1473.69	737.852	1473.69	737.852	2	20	1.1.1.2437.14	41.9594	28182.2	22275.2	41.89	0.15	4662.38
2	sp|Q9NNW7|TRXR2_DROME; sp|Q9NNW7-2|TRXR2_DROME	Thioredoxin reductase 2, mitochondrial OS=Homo sapiens GN=TXNRD2 PE=1 SV=3; Isoform 2 of Thioredoxin reductase 2, mitochondrial OS=Homo sapiens GN=TXNRD2	0	99	HFLGPNAGEVTQGF			cleaved L-H@N-term; cleaved F-A@C-term	-0.000882081	1472.7	737.359	1472.7	737.36	2	22	1.1.1.2366.19	38.4742	428894	279787	38.64	0.39	37418.5
2	sp|Q9NNW7|TRXR2_DROME; sp|Q9NNW7-2|TRXR2_DROME	Thioredoxin reductase 2, mitochondrial OS=Homo sapiens GN=TXNRD2 PE=1 SV=3; Isoform 2 of Thioredoxin reductase 2, mitochondrial OS=Homo sapiens GN=TXNRD2	0	99	HFLGPNAGEVTQGF			cleaved L-H@N-term; cleaved F-A@C-term	-0.000882081	1472.7	737.359	1472.7	737.36	2	21	1.1.1.2375.8	38.8995	428894	169275	38.64	0.39	21727.5
2	sp|Q9NNW7|TRXR2_DROME; sp|Q9NNW7-2|TRXR2_DROME	Thioredoxin reductase 2, mitochondrial OS=Homo sapiens GN=TXNRD2 PE=1 SV=3; Isoform 2 of Thioredoxin reductase 2, mitochondrial OS=Homo sapiens GN=TXNRD2	0	99	HFLGPNAGEVTQGF			cleaved L-H@N-term; cleaved F-A@C-term	-0.000882081	1472.7	737.359	1472.7	737.36	2	21	1.1.1.2376.7	38.9672	428894	106467	38.64	0.39	13796.7
2	sp|Q9NNW7|TRXR2_DROME; sp|Q9NNW7-2|TRXR2_DROME	Thioredoxin reductase 2, mitochondrial OS=Homo sapiens GN=TXNRD2 PE=1 SV=3; Isoform 2 of Thioredoxin reductase 2, mitochondrial OS=Homo sapiens GN=TXNRD2	0	99	HFLGPNAGEVTQGF	Deamidated(N)@6		cleaved L-H@N-term; cleaved F-A@C-term	0.0037499	1473.69	737.854	1473.69	737.852	2	16	1.1.1.2411.7	40.6804	15657.6	14928	40.71	0.2	3101.4
2	sp|Q9NNW7|TRXR2_DROME; sp|Q9NNW7-2|TRXR2_DROME	Thioredoxin reductase 2, mitochondrial OS=Homo sapiens GN=TXNRD2 PE=1 SV=3; Isoform 2 of Thioredoxin reductase 2, mitochondrial OS=Homo sapiens GN=TXNRD2	0	99	HFLGPNAGEVTQGF			cleaved L-H@N-term; cleaved F-A@C-term	-0.000882081	1472.7	737.359	1472.7	737.36	2	21	1.1.1.2368.19	38.5727	428894	404174	38.64	0.39	54860.9
2	sp|Q9NNW7|TRXR2_DROME; sp|Q9NNW7-2|TRXR2_DROME	Thioredoxin reductase 2, mitochondrial OS=Homo sapiens GN=TXNRD2 PE=1 SV=3; Isoform 2 of Thioredoxin reductase 2, mitochondrial OS=Homo sapiens GN=TXNRD2	0	99	HFLGPNAGEVTQGF			cleaved L-H@N-term; cleaved F-A@C-term	-0.000882081	1472.7	737.359	1472.7	737.36	2	22	1.1.1.2371.14	38.7119	428894	393940	38.64	0.39	55449.5
2	sp|Q9NNW7|TRXR2_DROME; sp|Q9NNW7-2|TRXR2_DROME	Thioredoxin reductase 2, mitochondrial OS=Homo sapiens GN=TXNRD2 PE=1 SV=3; Isoform 2 of Thioredoxin reductase 2, mitochondrial OS=Homo sapiens GN=TXNRD2	0	99	HFLGPNAGEVTQGF			cleaved L-H@N-term; cleaved F-A@C-term	-0.000882081	1472.7	737.359	1472.7	737.36	2	23	1.1.1.2373.12	38.8209	428894	261812	38.64	0.39	35697.7
2	sp|Q9NNW7|TRXR2_DROME; sp|Q9NNW7-2|TRXR2_DROME	Thioredoxin reductase 2, mitochondrial OS=Homo sapiens GN=TXNRD2 PE=1 SV=3; Isoform 2 of Thioredoxin reductase 2, mitochondrial OS=Homo sapiens GN=TXNRD2	0	99	HFLGPNAGEVTQGF			cleaved L-H@N-term; cleaved F-A@C-term	-0.000882081	1472.7	737.359	1472.7	737.36	2	23	1.1.1.2374.8	38.8704	428894	200597	38.64	0.39	27291.7
2	sp|Q9NNW7|TRXR2_DROME; sp|Q9NNW7-2|TRXR2_DROME	Thioredoxin reductase 2, mitochondrial OS=Homo sapiens GN=TXNRD2 PE=1 SV=3; Isoform 2 of Thioredoxin reductase 2, mitochondrial OS=Homo sapiens GN=TXNRD2	0	99	HFLGPNAGEVTQGF			cleaved L-H@N-term; cleaved F-A@C-term	-0.000882081	1472.7	737.359	1472.7	737.36	2	24	1.1.1.2367.19	38.5284	428894	356831	38.64	0.39	46795.9
2	sp|Q9NNW7|TRXR2_DROME; sp|Q9NNW7-2|TRXR2_DROME	Thioredoxin reductase 2, mitochondrial OS=Homo sapiens GN=TXNRD2 PE=1 SV=3; Isoform 2 of Thioredoxin reductase 2, mitochondrial OS=Homo sapiens GN=TXNRD2	0	99	HFLGPNAGEVTQGFALGIK			cleaved L-H@N-term	0.00204443	1955.03	652.683	1955.03	652.683	3	23	1.1.1.2449.7	42.539	44840.1	43026.5	42.53	0.1	10808.6
2	sp|Q9NNW7|TRXR2_DROME; sp|Q9NNW7-2|TRXR2_DROME	Thioredoxin reductase 2, mitochondrial OS=Homo sapiens GN=TXNRD2 PE=1 SV=3; Isoform 2 of Thioredoxin reductase 2, mitochondrial OS=Homo sapiens GN=TXNRD2	0	99	HGQEHVEVYHAH			cleaved H-Y@C-term	0.00259041	1441.65	481.558	1441.65	481.557	3	17	1.1.1.1816.10	11.6832	25822.6	23879.3	11.71	0.15	6120.12
2	sp|Q9NNW7|TRXR2_DROME; sp|Q9NNW7-2|TRXR2_DROME	Thioredoxin reductase 2, mitochondrial OS=Homo sapiens GN=TXNRD2 PE=1 SV=3; Isoform 2 of Thioredoxin reductase 2, mitochondrial OS=Homo sapiens GN=TXNRD2	0	99	HGQEHVEVYHAH			cleaved H-Y@C-term	0.00259041	1441.65	481.558	1441.65	481.557	3	17	1.1.1.1820.2	11.8747	25822.6	9635.69	11.71	0.15	2737.11
2	sp|Q9NNW7|TRXR2_DROME; sp|Q9NNW7-2|TRXR2_DROME	Thioredoxin reductase 2, mitochondrial OS=Homo sapiens GN=TXNRD2 PE=1 SV=3; Isoform 2 of Thioredoxin reductase 2, mitochondrial OS=Homo sapiens GN=TXNRD2	0	99	HGQEHVEVYHAH			cleaved H-Y@C-term	0.00259041	1441.65	481.558	1441.65	481.557	3	16	1.1.1.1817.15	11.7407	25822.6	23803.6	11.71	0.15	6763.61
2	sp|Q9NNW7|TRXR2_DROME; sp|Q9NNW7-2|TRXR2_DROME	Thioredoxin reductase 2, mitochondrial OS=Homo sapiens GN=TXNRD2 PE=1 SV=3; Isoform 2 of Thioredoxin reductase 2, mitochondrial OS=Homo sapiens GN=TXNRD2	0	99	HGQEHVEVYHAH			cleaved H-Y@C-term	0.00259041	1441.65	481.558	1441.65	481.557	3	16	1.1.1.1815.13	11.6407	25822.6	17168.2	11.71	0.15	4132.78
2	sp|Q9NNW7|TRXR2_DROME; sp|Q9NNW7-2|TRXR2_DROME	Thioredoxin reductase 2, mitochondrial OS=Homo sapiens GN=TXNRD2 PE=1 SV=3; Isoform 2 of Thioredoxin reductase 2, mitochondrial OS=Homo sapiens GN=TXNRD2	0	99	HGQEHVEVYHAH			cleaved H-Y@C-term	0.00259041	1441.65	481.558	1441.65	481.557	3	15	1.1.1.1818.12	11.7848	25822.6	18477.5	11.71	0.15	5091.7
2	sp|Q9NNW7|TRXR2_DROME; sp|Q9NNW7-2|TRXR2_DROME	Thioredoxin reductase 2, mitochondrial OS=Homo sapiens GN=TXNRD2 PE=1 SV=3; Isoform 2 of Thioredoxin reductase 2, mitochondrial OS=Homo sapiens GN=TXNRD2	0	99	KLMHQAALL			cleaved L-G@C-term; missed K-L@1	0.000882463	1023.59	512.803	1023.59	512.802	2	14	1.1.1.2089.15	24.8657	67465.7	47291.6	24.93	0.1	6994.61
2	sp|Q9NNW7|TRXR2_DROME; sp|Q9NNW7-2|TRXR2_DROME	Thioredoxin reductase 2, mitochondrial OS=Homo sapiens GN=TXNRD2 PE=1 SV=3; Isoform 2 of Thioredoxin reductase 2, mitochondrial OS=Homo sapiens GN=TXNRD2	0	99	KLMHQAALL			cleaved L-G@C-term; missed K-L@1	0.000882463	1023.59	512.803	1023.59	512.802	2	14	1.1.1.2093.4	25.0509	67465.7	20479.2	24.93	0.1	3759.5
2	sp|Q9NNW7|TRXR2_DROME; sp|Q9NNW7-2|TRXR2_DROME	Thioredoxin reductase 2, mitochondrial OS=Homo sapiens GN=TXNRD2 PE=1 SV=3; Isoform 2 of Thioredoxin reductase 2, mitochondrial OS=Homo sapiens GN=TXNRD2	0	99	KLMHQAALLGGLIQDAPNYGWEVAQPVPHDWR			missed K-L@1	-0.00248308	3609.83	722.973	3609.83	722.973	5	25	1.1.1.2489.7	44.5164	40943.7	38531.3	44.55	0.15	11833.2
2	sp|Q9NNW7|TRXR2_DROME; sp|Q9NNW7-2|TRXR2_DROME	Thioredoxin reductase 2, mitochondrial OS=Homo sapiens GN=TXNRD2 PE=1 SV=3; Isoform 2 of Thioredoxin reductase 2, mitochondrial OS=Homo sapiens GN=TXNRD2	0	99	KMAEAVQNHVK			missed K-M@1	0.0021032	1253.66	627.836	1253.66	627.835	2	19	1.1.1.1831.16	12.4351	47289.8	22354.2	12.3	0.2	3661.54
2	sp|Q9NNW7|TRXR2_DROME; sp|Q9NNW7-2|TRXR2_DROME	Thioredoxin reductase 2, mitochondrial OS=Homo sapiens GN=TXNRD2 PE=1 SV=3; Isoform 2 of Thioredoxin reductase 2, mitochondrial OS=Homo sapiens GN=TXNRD2	0	99	KMAEAVQNHVK			missed K-M@1	0.0021032	1253.66	627.836	1253.66	627.835	2	17	1.1.1.1827.9	12.2492	47289.8	41015.8	12.3	0.2	1611.85
2	sp|Q9NNW7|TRXR2_DROME; sp|Q9NNW7-2|TRXR2_DROME	Thioredoxin reductase 2, mitochondrial OS=Homo sapiens GN=TXNRD2 PE=1 SV=3; Isoform 2 of Thioredoxin reductase 2, mitochondrial OS=Homo sapiens GN=TXNRD2	0	99	KMAEAVQNHVK	Deamidated(N)@8		missed K-M@1	-0.000960282	1254.64	419.22	1254.64	419.22	3	15	1.1.1.1863.2	13.8947	9518.17	9331.85	13.89	0.1	3906.51
2	sp|Q9NNW7|TRXR2_DROME; sp|Q9NNW7-2|TRXR2_DROME	Thioredoxin reductase 2, mitochondrial OS=Homo sapiens GN=TXNRD2 PE=1 SV=3; Isoform 2 of Thioredoxin reductase 2, mitochondrial OS=Homo sapiens GN=TXNRD2	0	99	KMAEAVQNHVK			missed K-M@1	0.003257	1253.66	418.893	1253.66	418.892	3	18	1.1.1.1832.3	12.4591	178192	61566.1	12.3	0.2	16848
2	sp|Q9NNW7|TRXR2_DROME; sp|Q9NNW7-2|TRXR2_DROME	Thioredoxin reductase 2, mitochondrial OS=Homo sapiens GN=TXNRD2 PE=1 SV=3; Isoform 2 of Thioredoxin reductase 2, mitochondrial OS=Homo sapiens GN=TXNRD2	0	99	KVAVVDYVEPSPQ			cleaved Q-G@C-term; missed K-V@1	0.00248733	1429.75	715.881	1429.75	715.88	2	16	1.1.1.2201.10	30.3924	4325.7	2366.36	30.51	0.2	842.538
2	sp|Q9NNW7|TRXR2_DROME; sp|Q9NNW7-2|TRXR2_DROME	Thioredoxin reductase 2, mitochondrial OS=Homo sapiens GN=TXNRD2 PE=1 SV=3; Isoform 2 of Thioredoxin reductase 2, mitochondrial OS=Homo sapiens GN=TXNRD2	0	99	KVAVVDYVEPSPQ			cleaved Q-G@C-term; missed K-V@1	0.00248733	1429.75	715.881	1429.75	715.88	2	15	1.1.1.2203.11	30.4808	4325.7	3989.37	30.51	0.2	1010.85
2	sp|Q9NNW7|TRXR2_DROME; sp|Q9NNW7-2|TRXR2_DROME	Thioredoxin reductase 2, mitochondrial OS=Homo sapiens GN=TXNRD2 PE=1 SV=3; Isoform 2 of Thioredoxin reductase 2, mitochondrial OS=Homo sapiens GN=TXNRD2	0	99	KVAVVDYVEPSPQGTR	Formyl(K)@1		missed K-V@1	0.001506	1771.91	886.963	1771.91	886.963	2	17	1.1.1.2291.26	34.8361	2784.14	2734.19	34.84	0.2	863.668
2	sp|Q9NNW7|TRXR2_DROME; sp|Q9NNW7-2|TRXR2_DROME	Thioredoxin reductase 2, mitochondrial OS=Homo sapiens GN=TXNRD2 PE=1 SV=3; Isoform 2 of Thioredoxin reductase 2, mitochondrial OS=Homo sapiens GN=TXNRD2	0	99	KVAVVDYVEPSPQGTR			missed K-V@1	-0.000452501	1743.92	582.312	1743.92	582.312	3	21	1.1.1.2146.13	27.6722	705885	139590	27.3	0.3	57585.7
2	sp|Q9NNW7|TRXR2_DROME; sp|Q9NNW7-2|TRXR2_DROME	Thioredoxin reductase 2, mitochondrial OS=Homo sapiens GN=TXNRD2 PE=1 SV=3; Isoform 2 of Thioredoxin reductase 2, mitochondrial OS=Homo sapiens GN=TXNRD2	0	99	KVAVVDYVEPSPQGTR			missed K-V@1	-0.000452501	1743.92	582.312	1743.92	582.312	3	21	1.1.1.2147.8	27.7314	705885	84026.4	27.3	0.3	38634.8
2	sp|Q9NNW7|TRXR2_DROME; sp|Q9NNW7-2|TRXR2_DROME	Thioredoxin reductase 2, mitochondrial OS=Homo sapiens GN=TXNRD2 PE=1 SV=3; Isoform 2 of Thioredoxin reductase 2, mitochondrial OS=Homo sapiens GN=TXNRD2	0	99	KVAVVDYVEPSPQGTR			missed K-V@1	-0.000452501	1743.92	582.312	1743.92	582.312	3	22	1.1.1.2148.8	27.7774	705885	62476.8	27.3	0.3	28938.3
2	sp|Q9NNW7|TRXR2_DROME; sp|Q9NNW7-2|TRXR2_DROME	Thioredoxin reductase 2, mitochondrial OS=Homo sapiens GN=TXNRD2 PE=1 SV=3; Isoform 2 of Thioredoxin reductase 2, mitochondrial OS=Homo sapiens GN=TXNRD2	0	99	KVAVVDYVEPSPQGTR			missed K-V@1	-0.000452501	1743.92	582.312	1743.92	582.312	3	21	1.1.1.2149.4	27.8249	705885	48173.8	27.3	0.3	17836.3
2	sp|Q9NNW7|TRXR2_DROME; sp|Q9NNW7-2|TRXR2_DROME	Thioredoxin reductase 2, mitochondrial OS=Homo sapiens GN=TXNRD2 PE=1 SV=3; Isoform 2 of Thioredoxin reductase 2, mitochondrial OS=Homo sapiens GN=TXNRD2	0	99	KVAVVDYVEPSPQGTR			missed K-V@1	-0.000452501	1743.92	582.312	1743.92	582.312	3	21	1.1.1.2145.13	27.6264	705885	208387	27.3	0.3	69820.9
2	sp|Q9NNW7|TRXR2_DROME; sp|Q9NNW7-2|TRXR2_DROME	Thioredoxin reductase 2, mitochondrial OS=Homo sapiens GN=TXNRD2 PE=1 SV=3; Isoform 2 of Thioredoxin reductase 2, mitochondrial OS=Homo sapiens GN=TXNRD2	0	99	LFGGSSDLMDYDNVPTTVFTPLEYGCVGLSEEEAVAR	Carbamidomethyl(C)@26			0.00397569	4037.86	1010.47	4037.85	1010.47	4	21	1.1.1.2549.10	47.5078	69148.1	43396.3	47.46	0.15	3459.74
2	sp|Q9NNW7|TRXR2_DROME; sp|Q9NNW7-2|TRXR2_DROME	Thioredoxin reductase 2, mitochondrial OS=Homo sapiens GN=TXNRD2 PE=1 SV=3; Isoform 2 of Thioredoxin reductase 2, mitochondrial OS=Homo sapiens GN=TXNRD2	0	99	LFGGSSDLMDYDNVPTTVFTPLEYGCVGLSEEEAVAR	Oxidation(P)@15; Cation:K(E)@23; Carbamidomethyl(C)@26	Oxidation(P)@396		-0.0257931	4091.78	1023.95	4091.81	1023.96	4	16	1.1.1.2549.11	47.5128	11467.3	6432.7	47.46	0.1	1563.16
2	sp|Q9NNW7|TRXR2_DROME; sp|Q9NNW7-2|TRXR2_DROME	Thioredoxin reductase 2, mitochondrial OS=Homo sapiens GN=TXNRD2 PE=1 SV=3; Isoform 2 of Thioredoxin reductase 2, mitochondrial OS=Homo sapiens GN=TXNRD2	0	99	LFGGSSDLMDYDNVPTTVFTPLEYGCVGLSEEEAVAR	Oxidation(P)@21; Cation:K(E)@23; Carbamidomethyl(C)@26	Oxidation(P)@402		-0.0257931	4091.78	1023.95	4091.81	1023.96	4	16	1.1.1.2549.11	47.5128	11467.3	6432.7	47.46	0.1	1563.16
2	sp|Q9NNW7|TRXR2_DROME; sp|Q9NNW7-2|TRXR2_DROME	Thioredoxin reductase 2, mitochondrial OS=Homo sapiens GN=TXNRD2 PE=1 SV=3; Isoform 2 of Thioredoxin reductase 2, mitochondrial OS=Homo sapiens GN=TXNRD2	0	99	LFGGSSDLMDYDNVPTTVFTPLEYGCVGLSEEEAVAR	Dioxidation(P)@21; No Carbamidomethyl(C)@26	Dioxidation(P)@402		0.0063664	4012.83	1004.22	4012.82	1004.21	4	17	1.1.1.2556.20	47.8492	5313.48	5216.1	47.86	0.15	1812.32
2	sp|Q9NNW7|TRXR2_DROME; sp|Q9NNW7-2|TRXR2_DROME	Thioredoxin reductase 2, mitochondrial OS=Homo sapiens GN=TXNRD2 PE=1 SV=3; Isoform 2 of Thioredoxin reductase 2, mitochondrial OS=Homo sapiens GN=TXNRD2	0	99	LFGGSSDLMDYDNVPTTVFTPLEYGCVGLSEEEAVAR	Dioxidation(Y)@24; No Carbamidomethyl(C)@26	Dioxidation(Y)@405		0.0063664	4012.83	1004.22	4012.82	1004.21	4	17	1.1.1.2556.20	47.8492	5313.48	5216.1	47.86	0.15	1812.32
2	sp|Q9NNW7|TRXR2_DROME; sp|Q9NNW7-2|TRXR2_DROME	Thioredoxin reductase 2, mitochondrial OS=Homo sapiens GN=TXNRD2 PE=1 SV=3; Isoform 2 of Thioredoxin reductase 2, mitochondrial OS=Homo sapiens GN=TXNRD2	0	99	LMHQAALLGGLIQ			cleaved Q-D@C-term	0.00237898	1363.77	682.891	1363.76	682.89	2	14	1.1.1.2464.9	43.2837	13660.9	13481.5	43.27	0.1	3437.37
2	sp|Q9NNW7|TRXR2_DROME; sp|Q9NNW7-2|TRXR2_DROME	Thioredoxin reductase 2, mitochondrial OS=Homo sapiens GN=TXNRD2 PE=1 SV=3; Isoform 2 of Thioredoxin reductase 2, mitochondrial OS=Homo sapiens GN=TXNRD2	0	99	LMHQAALLGGLIQDAPNYGWEVAQPVPH			cleaved H-D@C-term	0.0033162	3024.53	1009.18	3024.53	1009.18	3	24	1.1.1.2506.9	45.3764	69619.7	40983.4	45.3	0.1	2527.04
2	sp|Q9NNW7|TRXR2_DROME; sp|Q9NNW7-2|TRXR2_DROME	Thioredoxin reductase 2, mitochondrial OS=Homo sapiens GN=TXNRD2 PE=1 SV=3; Isoform 2 of Thioredoxin reductase 2, mitochondrial OS=Homo sapiens GN=TXNRD2	0	99	LMHQAALLGGLIQDAPNYGWEVAQPVPHDWR				0.00293058	3481.74	581.297	3481.74	581.297	6	22	1.1.1.2501.4	45.1031	40049.8	35217.1	45.14	0.15	13233.3
2	sp|Q9NNW7|TRXR2_DROME; sp|Q9NNW7-2|TRXR2_DROME	Thioredoxin reductase 2, mitochondrial OS=Homo sapiens GN=TXNRD2 PE=1 SV=3; Isoform 2 of Thioredoxin reductase 2, mitochondrial OS=Homo sapiens GN=TXNRD2	0	99	LMHQAALLGGLIQDAPNYGWEVAQPVPHDWR				0.00543415	3481.74	871.442	3481.74	871.441	4	20	1.1.1.2501.22	45.133	582422	574336	45.14	0.15	58763.8
2	sp|Q9NNW7|TRXR2_DROME; sp|Q9NNW7-2|TRXR2_DROME	Thioredoxin reductase 2, mitochondrial OS=Homo sapiens GN=TXNRD2 PE=1 SV=3; Isoform 2 of Thioredoxin reductase 2, mitochondrial OS=Homo sapiens GN=TXNRD2	0	99	LMHQAALLGGLIQDAPNYGWEVAQPVPHDWR				0.00234471	3481.74	1161.59	3481.74	1161.59	3	18	1.1.1.2501.26	45.1397	70757.8	70143.7	45.14	0.15	5421.9
2	sp|Q9NNW7|TRXR2_DROME; sp|Q9NNW7-2|TRXR2_DROME	Thioredoxin reductase 2, mitochondrial OS=Homo sapiens GN=TXNRD2 PE=1 SV=3; Isoform 2 of Thioredoxin reductase 2, mitochondrial OS=Homo sapiens GN=TXNRD2	0	99	LMHQAALLGGLIQDAPNYGWEVAQPVPHDWR				0.00543415	3481.74	871.442	3481.74	871.441	4	23	1.1.1.2502.12	45.179	582422	428386	45.14	0.15	65716.4
2	sp|Q9NNW7|TRXR2_DROME; sp|Q9NNW7-2|TRXR2_DROME	Thioredoxin reductase 2, mitochondrial OS=Homo sapiens GN=TXNRD2 PE=1 SV=3; Isoform 2 of Thioredoxin reductase 2, mitochondrial OS=Homo sapiens GN=TXNRD2	0	99	LMHQAALLGGLIQDAPNYGWEVAQPVPHDWR	Oxidation(W)@20			-0.00733435	3497.72	875.438	3497.73	875.44	4	15	1.1.1.2502.13	45.1824	2991.89	2265.31	45.1	0.15	2015.53
2	sp|Q9NNW7|TRXR2_DROME; sp|Q9NNW7-2|TRXR2_DROME	Thioredoxin reductase 2, mitochondrial OS=Homo sapiens GN=TXNRD2 PE=1 SV=3; Isoform 2 of Thioredoxin reductase 2, mitochondrial OS=Homo sapiens GN=TXNRD2	0	99	LMHQAALLGGLIQDAPNYGWEVAQPVPHDWR				-0.00177812	3481.73	697.354	3481.74	697.354	5	19	1.1.1.2506.4	45.3547	259808	6708.33	45.14	0.15	2233.8
2	sp|Q9NNW7|TRXR2_DROME; sp|Q9NNW7-2|TRXR2_DROME	Thioredoxin reductase 2, mitochondrial OS=Homo sapiens GN=TXNRD2 PE=1 SV=3; Isoform 2 of Thioredoxin reductase 2, mitochondrial OS=Homo sapiens GN=TXNRD2	0	99	LPDGQLQVTWEDSTTGK				0.00204662	1873.91	937.961	1873.91	937.96	2	20	1.1.1.2375.14	38.9162	24432.1	8048.11	39.13	0.25	1738.73
2	sp|Q9NNW7|TRXR2_DROME; sp|Q9NNW7-2|TRXR2_DROME	Thioredoxin reductase 2, mitochondrial OS=Homo sapiens GN=TXNRD2 PE=1 SV=3; Isoform 2 of Thioredoxin reductase 2, mitochondrial OS=Homo sapiens GN=TXNRD2	0	99	LPDGQLQVTWEDSTTGK				0.00204662	1873.91	937.961	1873.91	937.96	2	23	1.1.1.2377.13	39.0145	24432.1	15175.2	39.13	0.25	2494.47
2	sp|Q9NNW7|TRXR2_DROME; sp|Q9NNW7-2|TRXR2_DROME	Thioredoxin reductase 2, mitochondrial OS=Homo sapiens GN=TXNRD2 PE=1 SV=3; Isoform 2 of Thioredoxin reductase 2, mitochondrial OS=Homo sapiens GN=TXNRD2	0	99	LPDGQLQVTWEDSTTGK				0.00204662	1873.91	937.961	1873.91	937.96	2	23	1.1.1.2380.14	39.1688	24432.1	22741.5	39.13	0.25	3708
2	sp|Q9NNW7|TRXR2_DROME; sp|Q9NNW7-2|TRXR2_DROME	Thioredoxin reductase 2, mitochondrial OS=Homo sapiens GN=TXNRD2 PE=1 SV=3; Isoform 2 of Thioredoxin reductase 2, mitochondrial OS=Homo sapiens GN=TXNRD2	0	99	MAEAVQNHVK	Oxidation(M)@1			0.00147451	1141.56	571.785	1141.55	571.785	2	16	1.1.1.1793.11	10.8817	2889.23	2648.01	10.85	0.15	997.804
2	sp|Q9NNW7|TRXR2_DROME; sp|Q9NNW7-2|TRXR2_DROME	Thioredoxin reductase 2, mitochondrial OS=Homo sapiens GN=TXNRD2 PE=1 SV=3; Isoform 2 of Thioredoxin reductase 2, mitochondrial OS=Homo sapiens GN=TXNRD2	0	99	MAEAVQNHVK	Oxidation(M)@1			0.00147451	1141.56	571.785	1141.55	571.785	2	14	1.1.1.1794.11	10.936	2889.23	1629.74	10.85	0.15	386.293
2	sp|Q9NNW7|TRXR2_DROME; sp|Q9NNW7-2|TRXR2_DROME	Thioredoxin reductase 2, mitochondrial OS=Homo sapiens GN=TXNRD2 PE=1 SV=3; Isoform 2 of Thioredoxin reductase 2, mitochondrial OS=Homo sapiens GN=TXNRD2	0	99	MAEAVQNHVK				-0.00228143	1125.56	563.786	1125.56	563.787	2	17	1.1.1.1859.12	13.7314	161004	39990.6	13.54	0.2	6196.01
2	sp|Q9NNW7|TRXR2_DROME; sp|Q9NNW7-2|TRXR2_DROME	Thioredoxin reductase 2, mitochondrial OS=Homo sapiens GN=TXNRD2 PE=1 SV=3; Isoform 2 of Thioredoxin reductase 2, mitochondrial OS=Homo sapiens GN=TXNRD2	0	99	MAEAVQNHVK				-0.00228143	1125.56	563.786	1125.56	563.787	2	16	1.1.1.1860.12	13.7764	161004	18097.9	13.54	0.2	2189.41
2	sp|Q9NNW7|TRXR2_DROME; sp|Q9NNW7-2|TRXR2_DROME	Thioredoxin reductase 2, mitochondrial OS=Homo sapiens GN=TXNRD2 PE=1 SV=3; Isoform 2 of Thioredoxin reductase 2, mitochondrial OS=Homo sapiens GN=TXNRD2	0	99	MAEAVQNHVK	Formyl@N-term			0.00160736	1153.56	577.786	1153.55	577.785	2	15	1.1.1.2107.23	25.7668	10008.1	6626.46	25.68	0.2	2391.27
2	sp|Q9NNW7|TRXR2_DROME; sp|Q9NNW7-2|TRXR2_DROME	Thioredoxin reductase 2, mitochondrial OS=Homo sapiens GN=TXNRD2 PE=1 SV=3; Isoform 2 of Thioredoxin reductase 2, mitochondrial OS=Homo sapiens GN=TXNRD2	0	99	MAEAVQNHVK				-0.00228143	1125.56	563.786	1125.56	563.787	2	17	1.1.1.1855.26	13.5389	161004	158759	13.54	0.2	31780
2	sp|Q9NNW7|TRXR2_DROME; sp|Q9NNW7-2|TRXR2_DROME	Thioredoxin reductase 2, mitochondrial OS=Homo sapiens GN=TXNRD2 PE=1 SV=3; Isoform 2 of Thioredoxin reductase 2, mitochondrial OS=Homo sapiens GN=TXNRD2	0	99	MAEAVQNHVK				-0.00228143	1125.56	563.786	1125.56	563.787	2	17	1.1.1.1854.24	13.4861	161004	130597	13.54	0.2	32098.3
2	sp|Q9NNW7|TRXR2_DROME; sp|Q9NNW7-2|TRXR2_DROME	Thioredoxin reductase 2, mitochondrial OS=Homo sapiens GN=TXNRD2 PE=1 SV=3; Isoform 2 of Thioredoxin reductase 2, mitochondrial OS=Homo sapiens GN=TXNRD2	0	99	MAEAVQNHVK				-0.00228143	1125.56	563.786	1125.56	563.787	2	17	1.1.1.1856.18	13.5747	161004	144424	13.54	0.2	27958.9
2	sp|Q9NNW7|TRXR2_DROME; sp|Q9NNW7-2|TRXR2_DROME	Thioredoxin reductase 2, mitochondrial OS=Homo sapiens GN=TXNRD2 PE=1 SV=3; Isoform 2 of Thioredoxin reductase 2, mitochondrial OS=Homo sapiens GN=TXNRD2	0	99	RLPDGQLQVT			cleaved T-W@C-term; missed R-L@1	0.00122247	1125.62	563.815	1125.61	563.814	2	12	1.1.1.2122.8	26.491	27927.1	25267.4	26.56	0.49	4458.04
2	sp|Q9NNW7|TRXR2_DROME; sp|Q9NNW7-2|TRXR2_DROME	Thioredoxin reductase 2, mitochondrial OS=Homo sapiens GN=TXNRD2 PE=1 SV=3; Isoform 2 of Thioredoxin reductase 2, mitochondrial OS=Homo sapiens GN=TXNRD2	0	99	RLPDGQLQVT			cleaved T-W@C-term; missed R-L@1	0.00122247	1125.62	563.815	1125.61	563.814	2	11	1.1.1.2120.9	26.3915	27927.1	16171.4	26.56	0.49	3052.31
2	sp|Q9NNW7|TRXR2_DROME; sp|Q9NNW7-2|TRXR2_DROME	Thioredoxin reductase 2, mitochondrial OS=Homo sapiens GN=TXNRD2 PE=1 SV=3; Isoform 2 of Thioredoxin reductase 2, mitochondrial OS=Homo sapiens GN=TXNRD2	0	99	RLPDGQLQVTW			cleaved W-E@C-term; missed R-L@1	0.000746035	1311.69	656.854	1311.69	656.854	2	11	1.1.1.2406.17	40.4415	3939.23	3678.54	40.51	0.34	953.316
2	sp|Q9NNW7|TRXR2_DROME; sp|Q9NNW7-2|TRXR2_DROME	Thioredoxin reductase 2, mitochondrial OS=Homo sapiens GN=TXNRD2 PE=1 SV=3; Isoform 2 of Thioredoxin reductase 2, mitochondrial OS=Homo sapiens GN=TXNRD2	0	99	RLPDGQLQVTWEDSTTGK			missed R-L@1	-0.0041484	2030	677.675	2030.01	677.676	3	23	1.1.1.2301.17	35.3144	58048.9	55300.4	35.43	0.54	14465
2	sp|Q9NNW7|TRXR2_DROME; sp|Q9NNW7-2|TRXR2_DROME	Thioredoxin reductase 2, mitochondrial OS=Homo sapiens GN=TXNRD2 PE=1 SV=3; Isoform 2 of Thioredoxin reductase 2, mitochondrial OS=Homo sapiens GN=TXNRD2	0	99	RLPDGQLQVTWEDSTTGK			missed R-L@1	-0.0041484	2030	677.675	2030.01	677.676	3	21	1.1.1.2305.19	35.513	58048.9	49104.2	35.43	0.54	11512.7
2	sp|Q9NNW7|TRXR2_DROME; sp|Q9NNW7-2|TRXR2_DROME	Thioredoxin reductase 2, mitochondrial OS=Homo sapiens GN=TXNRD2 PE=1 SV=3; Isoform 2 of Thioredoxin reductase 2, mitochondrial OS=Homo sapiens GN=TXNRD2	0	99	RLPDGQLQVTWEDSTTGK			missed R-L@1	0.000905541	2030.01	1016.01	2030.01	1016.01	2	21	1.1.1.2310.12	35.7712	15516.9	5331.72	35.28	0.39	1020.72
2	sp|Q9NNW7|TRXR2_DROME; sp|Q9NNW7-2|TRXR2_DROME	Thioredoxin reductase 2, mitochondrial OS=Homo sapiens GN=TXNRD2 PE=1 SV=3; Isoform 2 of Thioredoxin reductase 2, mitochondrial OS=Homo sapiens GN=TXNRD2	0	99	RLPDGQLQVTWEDSTTGK	Deamidated(Q)@8		missed R-L@1	0.0110427	2031	678.008	2030.99	678.004	3	19	1.1.1.2328.20	36.6475	7848.29	6923.8	36.52	0.49	7328.16
2	sp|Q9NNW7|TRXR2_DROME; sp|Q9NNW7-2|TRXR2_DROME	Thioredoxin reductase 2, mitochondrial OS=Homo sapiens GN=TXNRD2 PE=1 SV=3; Isoform 2 of Thioredoxin reductase 2, mitochondrial OS=Homo sapiens GN=TXNRD2	0	99	RLPDGQLQVTWEDSTTGK			missed R-L@1	0.00354203	2030.01	677.677	2030.01	677.676	3	13	1.1.1.2426.11	41.4139	3102.86	2279.15	41.34	0.29	1722.03
2	sp|Q9NNW7|TRXR2_DROME; sp|Q9NNW7-2|TRXR2_DROME	Thioredoxin reductase 2, mitochondrial OS=Homo sapiens GN=TXNRD2 PE=1 SV=3; Isoform 2 of Thioredoxin reductase 2, mitochondrial OS=Homo sapiens GN=TXNRD2	0	99	RLPDGQLQVTWEDSTTGK			missed R-L@1	0.0090352	2030.02	677.679	2030.01	677.676	3	13	1.1.1.2456.9	42.8883	3313.83	2388.28	42.63	0.49	1608.64
2	sp|Q9NNW7|TRXR2_DROME; sp|Q9NNW7-2|TRXR2_DROME	Thioredoxin reductase 2, mitochondrial OS=Homo sapiens GN=TXNRD2 PE=1 SV=3; Isoform 2 of Thioredoxin reductase 2, mitochondrial OS=Homo sapiens GN=TXNRD2	0	99	RLPDGQLQVTWEDSTTGK			missed R-L@1	-0.00624241	2030	677.674	2030.01	677.676	3	9	1.1.1.2477.7	43.9235	1410.24	1165.46	44.01	0.49	1005.61
2	sp|Q9NNW7|TRXR2_DROME; sp|Q9NNW7-2|TRXR2_DROME	Thioredoxin reductase 2, mitochondrial OS=Homo sapiens GN=TXNRD2 PE=1 SV=3; Isoform 2 of Thioredoxin reductase 2, mitochondrial OS=Homo sapiens GN=TXNRD2	0	99	RSGLDPTVTGC	Carbamidomethyl(C)@11		cleaved C-U@C-term; missed R-S@1	0.0001872	1161.55	581.78	1161.54	581.78	2	17	1.1.1.2021.7	21.6578	61924.5	58717.1	21.67	0.2	16253.9
2	sp|Q9NNW7|TRXR2_DROME; sp|Q9NNW7-2|TRXR2_DROME	Thioredoxin reductase 2, mitochondrial OS=Homo sapiens GN=TXNRD2 PE=1 SV=3; Isoform 2 of Thioredoxin reductase 2, mitochondrial OS=Homo sapiens GN=TXNRD2	0	99	RSGLDPTVTGC	Carbamidomethyl(C)@11		cleaved C-U@C-term; missed R-S@1	0.0001872	1161.55	581.78	1161.54	581.78	2	17	1.1.1.2023.4	21.7408	61924.5	54404.5	21.67	0.2	17683
2	sp|Q9NNW7|TRXR2_DROME; sp|Q9NNW7-2|TRXR2_DROME	Thioredoxin reductase 2, mitochondrial OS=Homo sapiens GN=TXNRD2 PE=1 SV=3; Isoform 2 of Thioredoxin reductase 2, mitochondrial OS=Homo sapiens GN=TXNRD2	0	99	SDDIFWLK			cleaved T-S@N-term	0.00222375	1022.51	512.262	1022.51	512.261	2	13	1.1.1.2457.2	42.926	1162086	138599	42.77	0.1	7734.43
2	sp|Q9NNW7|TRXR2_DROME; sp|Q9NNW7-2|TRXR2_DROME	Thioredoxin reductase 2, mitochondrial OS=Homo sapiens GN=TXNRD2 PE=1 SV=3; Isoform 2 of Thioredoxin reductase 2, mitochondrial OS=Homo sapiens GN=TXNRD2	0	99	SDDIFWLK			cleaved T-S@N-term	0.00222375	1022.51	512.262	1022.51	512.261	2	13	1.1.1.2456.3	42.8783	1162086	378845	42.77	0.1	31836.3
2	sp|Q9NNW7|TRXR2_DROME; sp|Q9NNW7-2|TRXR2_DROME	Thioredoxin reductase 2, mitochondrial OS=Homo sapiens GN=TXNRD2 PE=1 SV=3; Isoform 2 of Thioredoxin reductase 2, mitochondrial OS=Homo sapiens GN=TXNRD2	0	99	SDDIFWLK			cleaved T-S@N-term	0.00222375	1022.51	512.262	1022.51	512.261	2	13	1.1.1.2452.5	42.684	1162086	615648	42.77	0.1	41406.1
2	sp|Q9NNW7|TRXR2_DROME; sp|Q9NNW7-2|TRXR2_DROME	Thioredoxin reductase 2, mitochondrial OS=Homo sapiens GN=TXNRD2 PE=1 SV=3; Isoform 2 of Thioredoxin reductase 2, mitochondrial OS=Homo sapiens GN=TXNRD2	0	99	SDDIFWLK	Oxidation(W)@6		cleaved T-S@N-term	0.00499471	1038.51	520.261	1038.5	520.258	2	9	1.1.1.2454.5	42.783	1309.81	1280.75	42.77	0.1	565.461
2	sp|Q9NNW7|TRXR2_DROME; sp|Q9NNW7-2|TRXR2_DROME	Thioredoxin reductase 2, mitochondrial OS=Homo sapiens GN=TXNRD2 PE=1 SV=3; Isoform 2 of Thioredoxin reductase 2, mitochondrial OS=Homo sapiens GN=TXNRD2	0	99	SGLDPTVTGC	Carbamidomethyl(C)@10		cleaved C-U@C-term	0.000366684	1005.44	503.729	1005.44	503.729	2	16	1.1.1.2109.12	25.8471	196501	76206.6	25.98	0.29	13059.9
2	sp|Q9NNW7|TRXR2_DROME; sp|Q9NNW7-2|TRXR2_DROME	Thioredoxin reductase 2, mitochondrial OS=Homo sapiens GN=TXNRD2 PE=1 SV=3; Isoform 2 of Thioredoxin reductase 2, mitochondrial OS=Homo sapiens GN=TXNRD2	0	99	SGLDPTVTGC	Carbamidomethyl(C)@10		cleaved C-U@C-term	0.000366684	1005.44	503.729	1005.44	503.729	2	17	1.1.1.2110.17	25.9045	196501	146840	25.98	0.29	31099.6
2	sp|Q9NNW7|TRXR2_DROME; sp|Q9NNW7-2|TRXR2_DROME	Thioredoxin reductase 2, mitochondrial OS=Homo sapiens GN=TXNRD2 PE=1 SV=3; Isoform 2 of Thioredoxin reductase 2, mitochondrial OS=Homo sapiens GN=TXNRD2	0	99	SGLDPTVTGC	Carbamidomethyl(C)@10		cleaved C-U@C-term	0.000366684	1005.44	503.729	1005.44	503.729	2	16	1.1.1.2112.13	25.9965	196501	189486	25.98	0.29	41102
2	sp|Q9NNW7|TRXR2_DROME; sp|Q9NNW7-2|TRXR2_DROME	Thioredoxin reductase 2, mitochondrial OS=Homo sapiens GN=TXNRD2 PE=1 SV=3; Isoform 2 of Thioredoxin reductase 2, mitochondrial OS=Homo sapiens GN=TXNRD2	0	99	SGLDPTVTGC	Carbamidomethyl(C)@10		cleaved C-U@C-term	0.000366684	1005.44	503.729	1005.44	503.729	2	17	1.1.1.2113.7	26.0357	196501	179068	25.98	0.29	40042.3
2	sp|Q9NNW7|TRXR2_DROME; sp|Q9NNW7-2|TRXR2_DROME	Thioredoxin reductase 2, mitochondrial OS=Homo sapiens GN=TXNRD2 PE=1 SV=3; Isoform 2 of Thioredoxin reductase 2, mitochondrial OS=Homo sapiens GN=TXNRD2	0	99	SGLDPTVTGC	Carbamidomethyl(C)@10		cleaved C-U@C-term	0.000366684	1005.44	503.729	1005.44	503.729	2	17	1.1.1.2114.10	26.0896	196501	161405	25.98	0.29	36674.1
2	sp|Q9NNW7|TRXR2_DROME; sp|Q9NNW7-2|TRXR2_DROME	Thioredoxin reductase 2, mitochondrial OS=Homo sapiens GN=TXNRD2 PE=1 SV=3; Isoform 2 of Thioredoxin reductase 2, mitochondrial OS=Homo sapiens GN=TXNRD2	0	99	SGLDPTVTGC	Carbamidomethyl(C)@10		cleaved C-U@C-term	0.000366684	1005.44	503.729	1005.44	503.729	2	17	1.1.1.2115.4	26.1288	196501	134616	25.98	0.29	30487.1
2	sp|Q9NNW7|TRXR2_DROME; sp|Q9NNW7-2|TRXR2_DROME	Thioredoxin reductase 2, mitochondrial OS=Homo sapiens GN=TXNRD2 PE=1 SV=3; Isoform 2 of Thioredoxin reductase 2, mitochondrial OS=Homo sapiens GN=TXNRD2	0	99	SGLDPTVTGC	Carbamidomethyl(C)@10		cleaved C-U@C-term	0.000366684	1005.44	503.729	1005.44	503.729	2	16	1.1.1.2111.11	25.9437	196501	178822	25.98	0.29	46431.7
2	sp|Q9NNW7|TRXR2_DROME; sp|Q9NNW7-2|TRXR2_DROME	Thioredoxin reductase 2, mitochondrial OS=Homo sapiens GN=TXNRD2 PE=1 SV=3; Isoform 2 of Thioredoxin reductase 2, mitochondrial OS=Homo sapiens GN=TXNRD2	0	99	SMVIEHM			cleaved S-S@N-term; cleaved M-A@C-term	0.00171268	845.379	423.697	845.378	423.696	2	9	1.1.1.2109.4	25.8338	12975.6	12443.1	25.82	0.1	5186.82
2	sp|Q9NNW7|TRXR2_DROME; sp|Q9NNW7-2|TRXR2_DROME	Thioredoxin reductase 2, mitochondrial OS=Homo sapiens GN=TXNRD2 PE=1 SV=3; Isoform 2 of Thioredoxin reductase 2, mitochondrial OS=Homo sapiens GN=TXNRD2	0	99	TLVVGASYVAL			cleaved L-E@C-term	0.000450626	1091.62	546.819	1091.62	546.819	2	12	1.1.1.2476.3	43.8671	58035.7	32469	43.96	0.15	3280.14
2	sp|Q9NNW7|TRXR2_DROME; sp|Q9NNW7-2|TRXR2_DROME	Thioredoxin reductase 2, mitochondrial OS=Homo sapiens GN=TXNRD2 PE=1 SV=3; Isoform 2 of Thioredoxin reductase 2, mitochondrial OS=Homo sapiens GN=TXNRD2	0	99	TLVVGASYVAL			cleaved L-E@C-term	0.000450626	1091.62	546.819	1091.62	546.819	2	17	1.1.1.2477.2	43.9151	58035.7	53881	43.96	0.15	8945.73
2	sp|Q9NNW7|TRXR2_DROME; sp|Q9NNW7-2|TRXR2_DROME	Thioredoxin reductase 2, mitochondrial OS=Homo sapiens GN=TXNRD2 PE=1 SV=3; Isoform 2 of Thioredoxin reductase 2, mitochondrial OS=Homo sapiens GN=TXNRD2	0	99	TLVVGASYVAL			cleaved L-E@C-term	0.000450626	1091.62	546.819	1091.62	546.819	2	15	1.1.1.2478.2	43.9644	58035.7	56467.2	43.96	0.15	7065
2	sp|Q9NNW7|TRXR2_DROME; sp|Q9NNW7-2|TRXR2_DROME	Thioredoxin reductase 2, mitochondrial OS=Homo sapiens GN=TXNRD2 PE=1 SV=3; Isoform 2 of Thioredoxin reductase 2, mitochondrial OS=Homo sapiens GN=TXNRD2	0	99	TPLEYGCVGLSEEEAVAR	Carbamidomethyl(C)@7		cleaved F-T@N-term	-0.00118465	1978.93	990.472	1978.93	990.473	2	25	1.1.1.2392.15	39.7632	98596.6	78832.3	39.82	0.1	8843.43
2	sp|Q9NNW7|TRXR2_DROME; sp|Q9NNW7-2|TRXR2_DROME	Thioredoxin reductase 2, mitochondrial OS=Homo sapiens GN=TXNRD2 PE=1 SV=3; Isoform 2 of Thioredoxin reductase 2, mitochondrial OS=Homo sapiens GN=TXNRD2	0	99	TPLEYGCVGLSEEEAVAR	Carbamidomethyl(C)@7		cleaved F-T@N-term	-0.00118465	1978.93	990.472	1978.93	990.473	2	24	1.1.1.2393.14	39.8125	98596.6	96252.1	39.82	0.1	12478.8
2	sp|Q9NNW7|TRXR2_DROME; sp|Q9NNW7-2|TRXR2_DROME	Thioredoxin reductase 2, mitochondrial OS=Homo sapiens GN=TXNRD2 PE=1 SV=3; Isoform 2 of Thioredoxin reductase 2, mitochondrial OS=Homo sapiens GN=TXNRD2	0	99	TPLEYGCVGLSEEEAVAR	Carbamidomethyl(C)@7		cleaved F-T@N-term	-0.00118465	1978.93	990.472	1978.93	990.473	2	22	1.1.1.2394.18	39.8621	98596.6	82633.2	39.82	0.1	8733.75
2	sp|Q9NNW7|TRXR2_DROME; sp|Q9NNW7-2|TRXR2_DROME	Thioredoxin reductase 2, mitochondrial OS=Homo sapiens GN=TXNRD2 PE=1 SV=3; Isoform 2 of Thioredoxin reductase 2, mitochondrial OS=Homo sapiens GN=TXNRD2	0	99	TPLEYGCVGLSEEEAVAR	Carbamidomethyl(C)@7		cleaved F-T@N-term	-0.00118465	1978.93	990.472	1978.93	990.473	2	22	1.1.1.2396.22	39.9606	98596.6	25809.4	39.82	0.1	2503.47
2	sp|Q9NNW7|TRXR2_DROME; sp|Q9NNW7-2|TRXR2_DROME	Thioredoxin reductase 2, mitochondrial OS=Homo sapiens GN=TXNRD2 PE=1 SV=3; Isoform 2 of Thioredoxin reductase 2, mitochondrial OS=Homo sapiens GN=TXNRD2	0	99	TVGIHPTCSEEVVK	Carbamidomethyl(C)@8			0.00045228	1554.77	778.393	1554.77	778.393	2	25	1.1.1.2040.13	22.5583	228909	171834	22.46	0.25	23099.5
2	sp|Q9NNW7|TRXR2_DROME; sp|Q9NNW7-2|TRXR2_DROME	Thioredoxin reductase 2, mitochondrial OS=Homo sapiens GN=TXNRD2 PE=1 SV=3; Isoform 2 of Thioredoxin reductase 2, mitochondrial OS=Homo sapiens GN=TXNRD2	0	99	TVGIHPTCSEEVVK	Carbamidomethyl(C)@8			0.00045228	1554.77	778.393	1554.77	778.393	2	24	1.1.1.2042.10	22.647	228909	100403	22.46	0.25	14202.9
2	sp|Q9NNW7|TRXR2_DROME; sp|Q9NNW7-2|TRXR2_DROME	Thioredoxin reductase 2, mitochondrial OS=Homo sapiens GN=TXNRD2 PE=1 SV=3; Isoform 2 of Thioredoxin reductase 2, mitochondrial OS=Homo sapiens GN=TXNRD2	0	99	TVGIHPTCSEEVVK	Carbamidomethyl(C)@8			0.00045228	1554.77	778.393	1554.77	778.393	2	25	1.1.1.2043.9	22.706	228909	74080.3	22.46	0.25	12390
2	sp|Q9NNW7|TRXR2_DROME; sp|Q9NNW7-2|TRXR2_DROME	Thioredoxin reductase 2, mitochondrial OS=Homo sapiens GN=TXNRD2 PE=1 SV=3; Isoform 2 of Thioredoxin reductase 2, mitochondrial OS=Homo sapiens GN=TXNRD2	0	99	TVGIHPTCSEEVVK	Carbamidomethyl(C)@8			0.00045228	1554.77	778.393	1554.77	778.393	2	24	1.1.1.2044.7	22.7486	228909	63552.2	22.46	0.25	11461.6
2	sp|Q9NNW7|TRXR2_DROME; sp|Q9NNW7-2|TRXR2_DROME	Thioredoxin reductase 2, mitochondrial OS=Homo sapiens GN=TXNRD2 PE=1 SV=3; Isoform 2 of Thioredoxin reductase 2, mitochondrial OS=Homo sapiens GN=TXNRD2	0	99	TVGIHPTCSEEVVK	Carbamidomethyl(C)@8			0.00045228	1554.77	778.393	1554.77	778.393	2	23	1.1.1.2045.10	22.7995	228909	49774.9	22.46	0.25	8772.9
2	sp|Q9NNW7|TRXR2_DROME; sp|Q9NNW7-2|TRXR2_DROME	Thioredoxin reductase 2, mitochondrial OS=Homo sapiens GN=TXNRD2 PE=1 SV=3; Isoform 2 of Thioredoxin reductase 2, mitochondrial OS=Homo sapiens GN=TXNRD2	0	99	TVGIHPTCSEEVVK	Carbamidomethyl(C)@8			0.00045228	1554.77	778.393	1554.77	778.393	2	23	1.1.1.2046.11	22.8535	228909	40031.2	22.46	0.25	7066.02
2	sp|Q9NNW7|TRXR2_DROME; sp|Q9NNW7-2|TRXR2_DROME	Thioredoxin reductase 2, mitochondrial OS=Homo sapiens GN=TXNRD2 PE=1 SV=3; Isoform 2 of Thioredoxin reductase 2, mitochondrial OS=Homo sapiens GN=TXNRD2	0	99	TVGIHPTCSEEVVK	Formyl@N-term; Carbamidomethyl(C)@8			0.000151007	1582.77	792.39	1582.77	792.39	2	18	1.1.1.2169.24	28.8224	8224.7	8049.87	28.79	0.15	2109.18
2	sp|Q9NNW7|TRXR2_DROME; sp|Q9NNW7-2|TRXR2_DROME	Thioredoxin reductase 2, mitochondrial OS=Homo sapiens GN=TXNRD2 PE=1 SV=3; Isoform 2 of Thioredoxin reductase 2, mitochondrial OS=Homo sapiens GN=TXNRD2	0	99	VALECAGF	Carbamidomethyl(C)@5		cleaved Y-V@N-term; cleaved F-L@C-term	0.00183561	865.402	433.708	865.4	433.707	2	9	1.1.1.2326.3	36.5206	1259.33	590.46	36.42	0.2	441.975
2	sp|Q9NNW7|TRXR2_DROME; sp|Q9NNW7-2|TRXR2_DROME	Thioredoxin reductase 2, mitochondrial OS=Homo sapiens GN=TXNRD2 PE=1 SV=3; Isoform 2 of Thioredoxin reductase 2, mitochondrial OS=Homo sapiens GN=TXNRD2	0	99	VALECAGFLTGIGLDTTIMMR	Carbamidomethyl(C)@5		cleaved Y-V@N-term	-0.00164964	2268.13	757.051	2268.13	757.051	3	18	1.1.1.2542.6	47.1328	11195.4	9717.11	47.07	0.25	1678.49
2	sp|Q9NNW7|TRXR2_DROME; sp|Q9NNW7-2|TRXR2_DROME	Thioredoxin reductase 2, mitochondrial OS=Homo sapiens GN=TXNRD2 PE=1 SV=3; Isoform 2 of Thioredoxin reductase 2, mitochondrial OS=Homo sapiens GN=TXNRD2	0	99	VALECAGFLTGIGLDTTIMMR	Carbamidomethyl(C)@5		cleaved Y-V@N-term	-0.00164964	2268.13	757.051	2268.13	757.051	3	17	1.1.1.2543.14	47.1958	11195.4	7804.84	47.07	0.25	1304.78
2	sp|Q9NNW7|TRXR2_DROME; sp|Q9NNW7-2|TRXR2_DROME	Thioredoxin reductase 2, mitochondrial OS=Homo sapiens GN=TXNRD2 PE=1 SV=3; Isoform 2 of Thioredoxin reductase 2, mitochondrial OS=Homo sapiens GN=TXNRD2	0	99	VALECAGFLTGIGLDTTIMMR	Carbamidomethyl(C)@5		cleaved Y-V@N-term	-0.00164964	2268.13	757.051	2268.13	757.051	3	13	1.1.1.2550.11	47.5384	11195.4	2463.88	47.07	0.25	612.492
2	sp|Q9NNW7|TRXR2_DROME; sp|Q9NNW7-2|TRXR2_DROME	Thioredoxin reductase 2, mitochondrial OS=Homo sapiens GN=TXNRD2 PE=1 SV=3; Isoform 2 of Thioredoxin reductase 2, mitochondrial OS=Homo sapiens GN=TXNRD2	0	99	VAVVDYVEPSPQGTR				-0.000391273	1615.82	808.917	1615.82	808.918	2	24	1.1.1.2229.24	31.775	462039	204022	31.88	0.2	29151.9
2	sp|Q9NNW7|TRXR2_DROME; sp|Q9NNW7-2|TRXR2_DROME	Thioredoxin reductase 2, mitochondrial OS=Homo sapiens GN=TXNRD2 PE=1 SV=3; Isoform 2 of Thioredoxin reductase 2, mitochondrial OS=Homo sapiens GN=TXNRD2	0	99	VAVVDYVEPSPQGTR				-0.000391273	1615.82	808.917	1615.82	808.918	2	25	1.1.1.2230.11	31.8225	462039	365603	31.88	0.2	70575.9
2	sp|Q9NNW7|TRXR2_DROME; sp|Q9NNW7-2|TRXR2_DROME	Thioredoxin reductase 2, mitochondrial OS=Homo sapiens GN=TXNRD2 PE=1 SV=3; Isoform 2 of Thioredoxin reductase 2, mitochondrial OS=Homo sapiens GN=TXNRD2	0	99	VAVVDYVEPSPQGTR				-0.000391273	1615.82	808.917	1615.82	808.918	2	24	1.1.1.2231.24	31.8732	462039	451484	31.88	0.2	120499
2	sp|Q9NNW7|TRXR2_DROME; sp|Q9NNW7-2|TRXR2_DROME	Thioredoxin reductase 2, mitochondrial OS=Homo sapiens GN=TXNRD2 PE=1 SV=3; Isoform 2 of Thioredoxin reductase 2, mitochondrial OS=Homo sapiens GN=TXNRD2	0	99	VAVVDYVEPSPQGTR				-0.000391273	1615.82	808.917	1615.82	808.918	2	25	1.1.1.2232.25	31.924	462039	425620	31.88	0.2	81429.1
2	sp|Q9NNW7|TRXR2_DROME; sp|Q9NNW7-2|TRXR2_DROME	Thioredoxin reductase 2, mitochondrial OS=Homo sapiens GN=TXNRD2 PE=1 SV=3; Isoform 2 of Thioredoxin reductase 2, mitochondrial OS=Homo sapiens GN=TXNRD2	0	99	VAVVDYVEPSPQGTR				-0.000391273	1615.82	808.917	1615.82	808.918	2	24	1.1.1.2233.15	31.9648	462039	348040	31.88	0.2	78137.1
2	sp|Q9NNW7|TRXR2_DROME; sp|Q9NNW7-2|TRXR2_DROME	Thioredoxin reductase 2, mitochondrial OS=Homo sapiens GN=TXNRD2 PE=1 SV=3; Isoform 2 of Thioredoxin reductase 2, mitochondrial OS=Homo sapiens GN=TXNRD2	0	99	VAVVDYVEPSPQGTR				-0.000391273	1615.82	808.917	1615.82	808.918	2	24	1.1.1.2234.4	32.024	462039	257366	31.88	0.2	64042.6
2	sp|Q9NNW7|TRXR2_DROME; sp|Q9NNW7-2|TRXR2_DROME	Thioredoxin reductase 2, mitochondrial OS=Homo sapiens GN=TXNRD2 PE=1 SV=3; Isoform 2 of Thioredoxin reductase 2, mitochondrial OS=Homo sapiens GN=TXNRD2	0	99	VAVVDYVEPSPQGTR				-0.000391273	1615.82	808.917	1615.82	808.918	2	24	1.1.1.2235.5	32.0732	462039	197374	31.88	0.2	49838.7
2	sp|Q9NNW7|TRXR2_DROME; sp|Q9NNW7-2|TRXR2_DROME	Thioredoxin reductase 2, mitochondrial OS=Homo sapiens GN=TXNRD2 PE=1 SV=3; Isoform 2 of Thioredoxin reductase 2, mitochondrial OS=Homo sapiens GN=TXNRD2	0	99	VAVVDYVEPSPQGTR				-0.000391273	1615.82	808.917	1615.82	808.918	2	25	1.1.1.2236.7	32.1162	462039	146126	31.88	0.2	36371.4
2	sp|Q9NNW7|TRXR2_DROME; sp|Q9NNW7-2|TRXR2_DROME	Thioredoxin reductase 2, mitochondrial OS=Homo sapiens GN=TXNRD2 PE=1 SV=3; Isoform 2 of Thioredoxin reductase 2, mitochondrial OS=Homo sapiens GN=TXNRD2	0	99	VAVVDYVEPSPQGTR				-0.000391273	1615.82	808.917	1615.82	808.918	2	21	1.1.1.2237.13	32.1622	462039	97605.6	31.88	0.2	19650.9
2	sp|Q9NNW7|TRXR2_DROME; sp|Q9NNW7-2|TRXR2_DROME	Thioredoxin reductase 2, mitochondrial OS=Homo sapiens GN=TXNRD2 PE=1 SV=3; Isoform 2 of Thioredoxin reductase 2, mitochondrial OS=Homo sapiens GN=TXNRD2	0	99	VAVVDYVEPSPQGTR				-0.000391273	1615.82	808.917	1615.82	808.918	2	22	1.1.1.2238.15	32.2215	462039	45754.7	31.88	0.2	7553.11
2	sp|Q9NNW7|TRXR2_DROME; sp|Q9NNW7-2|TRXR2_DROME	Thioredoxin reductase 2, mitochondrial OS=Homo sapiens GN=TXNRD2 PE=1 SV=3; Isoform 2 of Thioredoxin reductase 2, mitochondrial OS=Homo sapiens GN=TXNRD2	0	99	VAVVDYVEPSPQGTR	Formyl@N-term			0.00369213	1643.82	822.917	1643.82	822.915	2	12	1.1.1.2448.12	42.5015	2275.06	2070.13	42.48	0.1	998.347
2	sp|Q9NNW7|TRXR2_DROME; sp|Q9NNW7-2|TRXR2_DROME	Thioredoxin reductase 2, mitochondrial OS=Homo sapiens GN=TXNRD2 PE=1 SV=3; Isoform 2 of Thioredoxin reductase 2, mitochondrial OS=Homo sapiens GN=TXNRD2	0	99	VVGGGSGGLACAK	Carbamidomethyl(C)@11		cleaved L-V@N-term	-0.00100027	1131.57	566.792	1131.57	566.793	2	21	1.1.1.1911.11	16.2276	78948.8	66299.9	16.26	0.1	15384.4
2	sp|Q9NNW7|TRXR2_DROME; sp|Q9NNW7-2|TRXR2_DROME	Thioredoxin reductase 2, mitochondrial OS=Homo sapiens GN=TXNRD2 PE=1 SV=3; Isoform 2 of Thioredoxin reductase 2, mitochondrial OS=Homo sapiens GN=TXNRD2	0	99	VVGGGSGGLACAK	Carbamidomethyl(C)@11		cleaved L-V@N-term	-0.00100027	1131.57	566.792	1131.57	566.793	2	19	1.1.1.1913.14	16.3408	78948.8	39409.3	16.26	0.1	3391.37
2	sp|Q9NNW7|TRXR2_DROME; sp|Q9NNW7-2|TRXR2_DROME	Thioredoxin reductase 2, mitochondrial OS=Homo sapiens GN=TXNRD2 PE=1 SV=3; Isoform 2 of Thioredoxin reductase 2, mitochondrial OS=Homo sapiens GN=TXNRD2	0	99	WGLGGTCVN	Carbamidomethyl(C)@7		cleaved N-V@C-term	-0.00175194	962.426	482.22	962.428	482.221	2	14	1.1.1.2297.4	35.0945	9266.58	8678.81	35.04	0.15	2422.74
2	sp|Q9NNW7|TRXR2_DROME; sp|Q9NNW7-2|TRXR2_DROME	Thioredoxin reductase 2, mitochondrial OS=Homo sapiens GN=TXNRD2 PE=1 SV=3; Isoform 2 of Thioredoxin reductase 2, mitochondrial OS=Homo sapiens GN=TXNRD2	0	99	WGLGGTCVNVGCIPK	Carbamidomethyl(C)@7; Carbamidomethyl(C)@12			-0.00299661	1616.78	809.396	1616.78	809.397	2	25	1.1.1.2434.20	41.8217	1898011	393622	41.64	0.15	37912.5
2	sp|Q9NNW7|TRXR2_DROME; sp|Q9NNW7-2|TRXR2_DROME	Thioredoxin reductase 2, mitochondrial OS=Homo sapiens GN=TXNRD2 PE=1 SV=3; Isoform 2 of Thioredoxin reductase 2, mitochondrial OS=Homo sapiens GN=TXNRD2	0	99	WGLGGTCVNVGCIPK	Carbamidomethyl(C)@7; Carbamidomethyl(C)@12			-0.00299661	1616.78	809.396	1616.78	809.397	2	24	1.1.1.2435.19	41.8692	1898011	176312	41.64	0.15	15223.6
2	sp|Q9NNW7|TRXR2_DROME; sp|Q9NNW7-2|TRXR2_DROME	Thioredoxin reductase 2, mitochondrial OS=Homo sapiens GN=TXNRD2 PE=1 SV=3; Isoform 2 of Thioredoxin reductase 2, mitochondrial OS=Homo sapiens GN=TXNRD2	0	99	WGLGGTCVNVGCIPK	Lys-add@N-term; Carbamidomethyl(C)@7; Carbamidomethyl(C)@12			0.00160667	1744.88	582.633	1744.88	582.632	3	14	1.1.1.2337.9	37.0281	33495.5	23717.2	36.97	0.1	2494.24
2	sp|Q9NNW7|TRXR2_DROME; sp|Q9NNW7-2|TRXR2_DROME	Thioredoxin reductase 2, mitochondrial OS=Homo sapiens GN=TXNRD2 PE=1 SV=3; Isoform 2 of Thioredoxin reductase 2, mitochondrial OS=Homo sapiens GN=TXNRD2	0	99	WGLGGTCVNVGCIPK	Oxidation(W)@1; Carbamidomethyl(C)@7; Carbamidomethyl(C)@12			0.00269994	1632.78	817.396	1632.78	817.395	2	12	1.1.1.2411.11	40.6971	1400.07	435.26	40.61	0.2	464.984
2	sp|Q9NNW7|TRXR2_DROME; sp|Q9NNW7-2|TRXR2_DROME	Thioredoxin reductase 2, mitochondrial OS=Homo sapiens GN=TXNRD2 PE=1 SV=3; Isoform 2 of Thioredoxin reductase 2, mitochondrial OS=Homo sapiens GN=TXNRD2	0	99	WGLGGTCVNVGCIPK	Carbamidomethyl(C)@7; Carbamidomethyl(C)@12			-0.00299661	1616.78	809.396	1616.78	809.397	2	24	1.1.1.2432.15	41.727	1898011	1185798	41.64	0.15	134797
2	sp|Q9NNW7|TRXR2_DROME; sp|Q9NNW7-2|TRXR2_DROME	Thioredoxin reductase 2, mitochondrial OS=Homo sapiens GN=TXNRD2 PE=1 SV=3; Isoform 2 of Thioredoxin reductase 2, mitochondrial OS=Homo sapiens GN=TXNRD2	0	99	WGLGGTCVNVGCIPK	Carbamidomethyl(C)@7; Carbamidomethyl(C)@12			-0.00299661	1616.78	809.396	1616.78	809.397	2	24	1.1.1.2433.8	41.7729	1898011	761721	41.64	0.15	87258.2
2	sp|Q9NNW7|TRXR2_DROME; sp|Q9NNW7-2|TRXR2_DROME	Thioredoxin reductase 2, mitochondrial OS=Homo sapiens GN=TXNRD2 PE=1 SV=3; Isoform 2 of Thioredoxin reductase 2, mitochondrial OS=Homo sapiens GN=TXNRD2	0	99	WGLGGTCVNVGCIPK	Carbamidomethyl(C)@7; Carbamidomethyl(C)@12; Didehydro@C-term			0.00154495	1614.77	808.39	1614.76	808.39	2	14	1.1.1.2428.22	41.5307	25913.9	22080.4	41.49	0.29	3595.51
2	sp|Q9NNW7|TRXR2_DROME; sp|Q9NNW7-2|TRXR2_DROME	Thioredoxin reductase 2, mitochondrial OS=Homo sapiens GN=TXNRD2 PE=1 SV=3; Isoform 2 of Thioredoxin reductase 2, mitochondrial OS=Homo sapiens GN=TXNRD2	0	99	WGLGGTCVNVGCIPK	Carbamidomethyl(C)@7; Carbamidomethyl(C)@12			-0.00299661	1616.78	809.396	1616.78	809.397	2	24	1.1.1.2431.19	41.6727	1898011	1708363	41.64	0.15	172478
2	sp|Q9NNW7|TRXR2_DROME; sp|Q9NNW7-2|TRXR2_DROME	Thioredoxin reductase 2, mitochondrial OS=Homo sapiens GN=TXNRD2 PE=1 SV=3; Isoform 2 of Thioredoxin reductase 2, mitochondrial OS=Homo sapiens GN=TXNRD2	0	99	WGLGGTCVNVGCIPK	Oxidation(W)@1; Carbamidomethyl(C)@7; Carbamidomethyl(C)@12			-0.00145045	1632.77	817.394	1632.78	817.395	2	12	1.1.1.2361.21	38.24	5768.27	5276.24	38.2	0.15	1587.35
2	sp|Q9NNW7|TRXR2_DROME; sp|Q9NNW7-2|TRXR2_DROME	Thioredoxin reductase 2, mitochondrial OS=Homo sapiens GN=TXNRD2 PE=1 SV=3; Isoform 2 of Thioredoxin reductase 2, mitochondrial OS=Homo sapiens GN=TXNRD2	0	99	WGLGGTCVNVGCIPKK	Carbamidomethyl(C)@7; Carbamidomethyl(C)@12; Lys-loss@C-term		missed K-K@15	-0.00299661	1616.78	809.396	1616.78	809.397	2	22	1.1.1.2436.12	41.9067	1898011	89602	41.64	0.15	8426.09
2	sp|Q9NNW7|TRXR2_DROME; sp|Q9NNW7-2|TRXR2_DROME	Thioredoxin reductase 2, mitochondrial OS=Homo sapiens GN=TXNRD2 PE=1 SV=3; Isoform 2 of Thioredoxin reductase 2, mitochondrial OS=Homo sapiens GN=TXNRD2	0	99	WGLGGTCVNVGCIPKK	Carbamidomethyl(C)@7; Carbamidomethyl(C)@12; Delta:H(2)C(2)(K)@15; Dioxidation(K)@16	Dioxidation(K)@218	missed K-K@15	-0.000624797	1802.88	601.967	1802.88	601.968	3	16	1.1.1.2383.9	39.2972	4471.57	4176.15	39.28	0.2	1220.32
2	sp|Q9NNW7|TRXR2_DROME; sp|Q9NNW7-2|TRXR2_DROME	Thioredoxin reductase 2, mitochondrial OS=Homo sapiens GN=TXNRD2 PE=1 SV=3; Isoform 2 of Thioredoxin reductase 2, mitochondrial OS=Homo sapiens GN=TXNRD2	0	99	WGLGGTCVNVGCIPKK	Carbamidomethyl(C)@7; Carbamidomethyl(C)@12; Dioxidation(K)@15; Delta:H(2)C(2)(K)@16	Dioxidation(K)@217	missed K-K@15	-0.000624797	1802.88	601.967	1802.88	601.968	3	16	1.1.1.2383.9	39.2972	4471.57	4176.15	39.28	0.2	1220.32
2	sp|Q9NNW7|TRXR2_DROME; sp|Q9NNW7-2|TRXR2_DROME	Thioredoxin reductase 2, mitochondrial OS=Homo sapiens GN=TXNRD2 PE=1 SV=3; Isoform 2 of Thioredoxin reductase 2, mitochondrial OS=Homo sapiens GN=TXNRD2	0	99	YKPLEFTVAGR			cleaved H-Y@N-term	0.000500435	1279.69	427.572	1279.69	427.571	3	13	1.1.1.2218.2	31.1961	9177.66	7603.15	30.99	0.54	1922.4
2	sp|Q9NNW7|TRXR2_DROME; sp|Q9NNW7-2|TRXR2_DROME	Thioredoxin reductase 2, mitochondrial OS=Homo sapiens GN=TXNRD2 PE=1 SV=3; Isoform 2 of Thioredoxin reductase 2, mitochondrial OS=Homo sapiens GN=TXNRD2	0	99	YPTHIEGALEY			cleaved Y-G@C-term	0.00145912	1291.61	646.812	1291.61	646.812	2	13	1.1.1.2287.13	34.6169	106581	15113.6	34.79	0.15	7688.23
2	sp|Q9NNW7|TRXR2_DROME; sp|Q9NNW7-2|TRXR2_DROME	Thioredoxin reductase 2, mitochondrial OS=Homo sapiens GN=TXNRD2 PE=1 SV=3; Isoform 2 of Thioredoxin reductase 2, mitochondrial OS=Homo sapiens GN=TXNRD2	0	99	YPTHIEGALEY			cleaved Y-G@C-term	0.00145912	1291.61	646.812	1291.61	646.812	2	15	1.1.1.2289.17	34.7224	106581	67335.2	34.79	0.15	20002
2	sp|Q9NNW7|TRXR2_DROME; sp|Q9NNW7-2|TRXR2_DROME	Thioredoxin reductase 2, mitochondrial OS=Homo sapiens GN=TXNRD2 PE=1 SV=3; Isoform 2 of Thioredoxin reductase 2, mitochondrial OS=Homo sapiens GN=TXNRD2	0	99	YPTHIEGALEY			cleaved Y-G@C-term	0.00145912	1291.61	646.812	1291.61	646.812	2	16	1.1.1.2291.12	34.8127	106581	105272	34.79	0.15	24694.8
2	sp|Q9NNW7|TRXR2_DROME; sp|Q9NNW7-2|TRXR2_DROME	Thioredoxin reductase 2, mitochondrial OS=Homo sapiens GN=TXNRD2 PE=1 SV=3; Isoform 2 of Thioredoxin reductase 2, mitochondrial OS=Homo sapiens GN=TXNRD2	0	99	YPTHIEGALEY			cleaved Y-G@C-term	0.00145912	1291.61	646.812	1291.61	646.812	2	14	1.1.1.2293.16	34.9181	106581	62691.8	34.79	0.15	9793.98
2	sp|Q9NNW7|TRXR2_DROME; sp|Q9NNW7-2|TRXR2_DROME	Thioredoxin reductase 2, mitochondrial OS=Homo sapiens GN=TXNRD2 PE=1 SV=3; Isoform 2 of Thioredoxin reductase 2, mitochondrial OS=Homo sapiens GN=TXNRD2	0	99	YPTHIEGALEYGIT			cleaved T-S@C-term	0.00123949	1562.76	782.389	1562.76	782.388	2	18	1.1.1.2393.9	39.7958	500355	64445.2	40.02	0.3	5077.57
2	sp|Q9NNW7|TRXR2_DROME; sp|Q9NNW7-2|TRXR2_DROME	Thioredoxin reductase 2, mitochondrial OS=Homo sapiens GN=TXNRD2 PE=1 SV=3; Isoform 2 of Thioredoxin reductase 2, mitochondrial OS=Homo sapiens GN=TXNRD2	0	99	YPTHIEGALEYGIT			cleaved T-S@C-term	0.00123949	1562.76	782.389	1562.76	782.388	2	23	1.1.1.2395.9	39.898	500355	244912	40.02	0.3	19647.5
2	sp|Q9NNW7|TRXR2_DROME; sp|Q9NNW7-2|TRXR2_DROME	Thioredoxin reductase 2, mitochondrial OS=Homo sapiens GN=TXNRD2 PE=1 SV=3; Isoform 2 of Thioredoxin reductase 2, mitochondrial OS=Homo sapiens GN=TXNRD2	0	99	YPTHIEGALEYGIT			cleaved T-S@C-term	0.00123949	1562.76	782.389	1562.76	782.388	2	24	1.1.1.2396.20	39.954	500355	410486	40.02	0.3	38454.2
2	sp|Q9NNW7|TRXR2_DROME; sp|Q9NNW7-2|TRXR2_DROME	Thioredoxin reductase 2, mitochondrial OS=Homo sapiens GN=TXNRD2 PE=1 SV=3; Isoform 2 of Thioredoxin reductase 2, mitochondrial OS=Homo sapiens GN=TXNRD2	0	99	YPTHIEGALEYGIT			cleaved T-S@C-term	0.00123949	1562.76	782.389	1562.76	782.388	2	22	1.1.1.2399.20	40.1016	500355	393772	40.02	0.3	33360.5
2	sp|Q9NNW7|TRXR2_DROME; sp|Q9NNW7-2|TRXR2_DROME	Thioredoxin reductase 2, mitochondrial OS=Homo sapiens GN=TXNRD2 PE=1 SV=3; Isoform 2 of Thioredoxin reductase 2, mitochondrial OS=Homo sapiens GN=TXNRD2	0	99	YPTHIEGALEYGIT			cleaved T-S@C-term	0.00123949	1562.76	782.389	1562.76	782.388	2	24	1.1.1.2400.13	40.1506	500355	324067	40.02	0.3	28451.9
2	sp|Q9NNW7|TRXR2_DROME; sp|Q9NNW7-2|TRXR2_DROME	Thioredoxin reductase 2, mitochondrial OS=Homo sapiens GN=TXNRD2 PE=1 SV=3; Isoform 2 of Thioredoxin reductase 2, mitochondrial OS=Homo sapiens GN=TXNRD2	0	99	YPTHIEGALEYGIT			cleaved T-S@C-term	0.00123949	1562.76	782.389	1562.76	782.388	2	24	1.1.1.2397.16	39.9968	500355	482428	40.02	0.3	62110.6
2	sp|Q9NNW7|TRXR2_DROME; sp|Q9NNW7-2|TRXR2_DROME	Thioredoxin reductase 2, mitochondrial OS=Homo sapiens GN=TXNRD2 PE=1 SV=3; Isoform 2 of Thioredoxin reductase 2, mitochondrial OS=Homo sapiens GN=TXNRD2	0	99	YPTHIEGALEYGIT			cleaved T-S@C-term	0.00123949	1562.76	782.389	1562.76	782.388	2	23	1.1.1.2401.11	40.205	500355	280423	40.02	0.3	25173.1
2	sp|Q9NNW7|TRXR2_DROME; sp|Q9NNW7-2|TRXR2_DROME	Thioredoxin reductase 2, mitochondrial OS=Homo sapiens GN=TXNRD2 PE=1 SV=3; Isoform 2 of Thioredoxin reductase 2, mitochondrial OS=Homo sapiens GN=TXNRD2	0	99	YPTHIEGALEYGITSDDIFWLK				0.000342593	2567.26	856.76	2567.26	856.76	3	24	1.1.1.2513.11	45.7079	98812	86114.6	45.74	0.15	14776.7
2	sp|Q9NNW7|TRXR2_DROME; sp|Q9NNW7-2|TRXR2_DROME	Thioredoxin reductase 2, mitochondrial OS=Homo sapiens GN=TXNRD2 PE=1 SV=3; Isoform 2 of Thioredoxin reductase 2, mitochondrial OS=Homo sapiens GN=TXNRD2	0	99	YPTHIEGALEYGITSDDIFWLK				0.000342593	2567.26	856.76	2567.26	856.76	3	25	1.1.1.2514.11	45.7624	98812	88270.4	45.74	0.15	10970.1
2	sp|Q9NNW7|TRXR2_DROME; sp|Q9NNW7-2|TRXR2_DROME	Thioredoxin reductase 2, mitochondrial OS=Homo sapiens GN=TXNRD2 PE=1 SV=3; Isoform 2 of Thioredoxin reductase 2, mitochondrial OS=Homo sapiens GN=TXNRD2	0	99	YPTHIEGALEYGITSDDIFWLK				0.000342593	2567.26	856.76	2567.26	856.76	3	23	1.1.1.2515.21	45.8237	98812	59320.3	45.74	0.15	5370.8
[truncated: 91 more rows]

## Sheet: IL1 proteins
N	Unused	Total	%Cov(95)	Accession	Name	Symbol	Peptides(95%)
1	429.03	429.03	64.7	tr|L0MPS3|L0MPS3_DROME	Apolipophorin, isoform B OS=Drosophila melanogaster OX=7227 GN=apolpp PE=1 SV=1	apolpp	342
[truncated: 3,731 more rows]

## Sheet: IL1 peptides
N	Accessions	Names	Contrib	Conf	Sequence	Modifications	ProteinModifications	Cleavages	dMass	Obs MW	Obs m/z	Theor MW	Theor m/z	Theor z	Sc	Spectrum	Acq Time	Intensity (Peptide)	PrecursorIntensityAcquisition	Apex Time (Peptide)	Elution Peak Width (Peptide)	MS2Counts
[truncated: 132,338 more rows]

[truncated: 8 more sheets: IL2 proteins, IL2 peptides, IL3 proteins, IL3 peptides, IL4 proteins, IL4 peptides, IL5 proteins, IL5 peptides]
